# Supplementary material for: 3D Functional Genomics Screens Identify CREBBP as a Targetable Driver in Aggressive Triple-Negative Breast Cancer
Source: Oxford University Press journal article supplement (doi:10.1158/0008-5472.can-20-1822), 2021-01-28
Supplement: 00085472can201822-sup-244334_2_supp_6736740_qk2c94.xls [file 00085472can201822-sup-244334_2_supp_6736740_qk2c94.xls]

## Sheet: Screen target list
Gene	Mutational Frequency	NCBI_ID	Ensembl_ID
PIK3CA	0.343792	5290	ENSG00000121879
TP53	0.304406	7157	ENSG00000141510
TTN	0.148865	7273	ENSG00000155657
CDH1	0.102136	999	ENSG00000039068
GATA3	0.0974633	2625	ENSG00000107485
MAP3K1	0.0787717	4214	ENSG00000095015
MLL3	0.0640854	58508	ENSG00000055609
MUC16	0.0594126	94025	ENSG00000181143
SYNE1	0.0447263	23345	ENSG00000131018
MUC4	0.0400534	4585	ENSG00000145113
FLG	0.0387183	2312	ENSG00000143631
USH2A	0.0380507	7399	ENSG00000042781
DST	0.0367156	667	ENSG00000151914
MUC12	0.0360481	10071	ENSG00000205277
NCOR1	0.0333778	9611	ENSG00000141027
DMD	0.0327103	1756	ENSG00000198947
RYR2	0.0327103	6262	ENSG00000198626
MAP2K4	0.0320427	6416	ENSG00000065559
RYR3	0.0313752	6263	ENSG00000198838
SYNE2	0.0313752	23224	ENSG00000054654
LRP2	0.0307076	4036	ENSG00000081479
HMCN1	0.0293725	83872	ENSG00000143341
PTEN	0.0293725	5728	ENSG00000171862
SPEN	0.0293725	23013	ENSG00000065526
HUWE1	0.0287049	10075	ENSG00000086758
MDN1	0.0287049	23195	ENSG00000112159
FAT3	0.0273698	120114	ENSG00000165323
MUC17	0.0273698	140453	ENSG00000169876
NEB	0.0273698	4703	ENSG00000183091
OBSCN	0.0273698	84033	ENSG00000154358
ARID1A	0.0260347	8289	ENSG00000117713
HRNR	0.0260347	388697	ENSG00000197915
CACNA1E	0.0253672	777	ENSG00000198216
MACF1	0.0253672	23499	ENSG00000127603
MUC5B	0.0253672	727897	ENSG00000117983
SPTA1	0.0253672	6708	ENSG00000163554
ZFHX4	0.0253672	79776	ENSG00000091656
APOB	0.0246996	338	ENSG00000084674
PCLO	0.024032	27445	ENSG00000186472
RUNX1	0.024032	100506403	ENSG00000159216
DNAH11	0.0233645	8701	ENSG00000105877
BIRC6	0.0226969	57448	ENSG00000115760
CSMD1	0.0226969	64478	ENSG00000183117
DNAH17	0.0226969	8632	ENSG00000187775
ABCA13	0.0220294	154664	ENSG00000179869
NF1	0.0220294	4763	ENSG00000196712
TBX3	0.0220294	6926	ENSG00000135111
XIRP2	0.0220294	129446	ENSG00000163092
DNAH2	0.0213618	146754	ENSG00000183914
GPR98	0.0213618	84059	ENSG00000164199
HYDIN	0.0213618	54768	ENSG00000157423
LRP1	0.0213618	4035	ENSG00000123384
RB1	0.0213618	5925	ENSG00000139687
RYR1	0.0213618	6261	ENSG00000196218
USP34	0.0213618	9736	ENSG00000115464
AHNAK	0.0206943	79026	ENSG00000124942
DYNC1H1	0.0206943	1778	ENSG00000197102
FCGBP	0.0206943	8857	ENSG00000090920
GOLGA6L2	0.0206943	283685	ENSG00000174450
GPR112	0.0206943	139378	ENSG00000156920
MXRA5	0.0206943	25878	ENSG00000101825
NOTCH2	0.0206943	4853	ENSG00000134250
PKHD1L1	0.0206943	93035	ENSG00000205038
CBFB	0.0200267	865	ENSG00000067955
CSMD3	0.0200267	114788	ENSG00000164796
TG	0.0200267	7038	ENSG00000042832
UBR4	0.0200267	23352	ENSG00000127481
ANK2	0.0193591	287	ENSG00000145362
ATM	0.0193591	472	ENSG00000149311
CMYA5	0.0193591	202333	ENSG00000164309
DNAH9	0.0193591	1770	ENSG00000007174
DYNC2H1	0.0193591	79659	ENSG00000187240
ERBB2	0.0193591	2064	ENSG00000141736
LYST	0.0193591	1130	ENSG00000143669
RELN	0.0193591	5649	ENSG00000189056
AHNAK2	0.0186916	113146	ENSG00000185567
CSMD2	0.0186916	114784	ENSG00000121904
HECTD4	0.0186916	283450	ENSG00000173064
HERC1	0.0186916	8925	ENSG00000103657
HERC2	0.0186916	8924	ENSG00000128731
KIAA1109	0.0186916	84162	ENSG00000138688
MED12	0.0186916	9968	ENSG00000184634
RNF213	0.0186916	57674	ENSG00000173821
DNAH3	0.018024	55567	ENSG00000158486
FAT4	0.018024	79633	ENSG00000196159
FLG2	0.018024	388698	ENSG00000143520
MYCBP2	0.018024	23077	ENSG00000005810
ODZ1	0.018024	10178	ENSG00000009694
UBR5	0.018024	51366	ENSG00000104517
AKAP9	0.0173565	10142	ENSG00000127914
ASPM	0.0173565	259266	ENSG00000066279
ATR	0.0173565	545	ENSG00000175054
CEP350	0.0173565	9857	ENSG00000135837
CUBN	0.0173565	8029	ENSG00000107611
DCHS2	0.0173565	54798	ENSG00000197410
DNAH8	0.0173565	1769	ENSG00000124721
DOCK11	0.0173565	139818	ENSG00000147251
EYS	0.0173565	346007	ENSG00000188107
VPS13C	0.0173565	54832	ENSG00000129003
DNAH5	0.0166889	1767	ENSG00000039139
FMN2	0.0166889	56776	ENSG00000155816
MAP1A	0.0166889	4130	ENSG00000166963
PKD1L1	0.0166889	168507	ENSG00000158683
PRUNE2	0.0166889	158471	ENSG00000106772
SACS	0.0166889	26278	ENSG00000151835
SF3B1	0.0166889	23451	ENSG00000115524
SI	0.0166889	6476	ENSG00000090402
SPHKAP	0.0166889	80309	ENSG00000153820
BRCA2	0.0160214	675	ENSG00000139618
CHD4	0.0160214	1108	ENSG00000111642
DMXL2	0.0160214	23312	ENSG00000104093
ERBB3	0.0160214	2065	ENSG00000065361
FOXA1	0.0160214	3169	ENSG00000129514
GON4L	0.0160214	54856	ENSG00000116580
SCN2A	0.0160214	6326	ENSG00000136531
VPS13D	0.0160214	55187	ENSG00000048707
ANK3	0.0153538	288	ENSG00000151150
ANKRD12	0.0153538	23253	ENSG00000101745
COL6A3	0.0153538	1293	ENSG00000163359
DNAH10	0.0153538	196385	ENSG00000197653
FAT2	0.0153538	2196	ENSG00000086570
LAMA1	0.0153538	284217	ENSG00000101680
MGAM	0.0153538	8972	ENSG00000257335
MLL	0.0153538	4297	ENSG00000118058
PCDH15	0.0153538	65217	ENSG00000150275
QSER1	0.0153538	79832	ENSG00000060749
SCN10A	0.0153538	6336	ENSG00000185313
SDK1	0.0153538	221935	ENSG00000146555
TCHH	0.0153538	7062	ENSG00000159450
TEX15	0.0153538	56154	ENSG00000133863
TPR	0.0153538	7175	ENSG00000047410
ARID1B	0.0146862	57492	ENSG00000049618
DNAH6	0.0146862	1768	ENSG00000115423
DNAH7	0.0146862	56171	ENSG00000118997
F5	0.0146862	2153	ENSG00000198734
KIAA0947	0.0146862	23379	ENSG00000164151
KIAA1210	0.0146862	57481	ENSG00000250423
LAMA2	0.0146862	3908	ENSG00000196569
PEG3	0.0146862	5178	ENSG00000198300
SMG1	0.0146862	23049	ENSG00000157106
HECW1	0.0140187	23072	ENSG00000002746
MYH11	0.0140187	4629	ENSG00000133392
NIPBL	0.0140187	25836	ENSG00000164190
SHROOM2	0.0140187	357	ENSG00000146950
SRRM2	0.0140187	23524	ENSG00000167978
ZDBF2	0.0140187	57683	ENSG00000204186
ATRX	0.0133511	546	ENSG00000085224
C5orf42	0.0133511	65250	ENSG00000197603
COL14A1	0.0133511	7373	ENSG00000187955
FAM208B	0.0133511	54906	ENSG00000108021
MYO9A	0.0133511	4649	ENSG00000066933
VCAN	0.0133511	1462	ENSG00000038427
ARHGAP5	0.0126836	394	ENSG00000100852
CACNA1B	0.0126836	774	ENSG00000148408
CACNA1F	0.0126836	778	ENSG00000102001
COL7A1	0.0126836	1294	ENSG00000114270
DNAH14	0.0126836	127602	ENSG00000185842
FBXW7	0.0126836	55294	ENSG00000109670
ITPR1	0.0126836	3708	ENSG00000150995
ITPR3	0.0126836	3710	ENSG00000096433
KIF4A	0.0126836	24137	ENSG00000090889
LAMB4	0.0126836	22798	ENSG00000091128
MYO18B	0.0126836	84700	ENSG00000133454
SZT2	0.0126836	23334	ENSG00000198198
ACE	0.012016	1636	ENSG00000159640
CCDC88A	0.012016	55704	ENSG00000115355
DIDO1	0.012016	11083	ENSG00000101191
PDE4DIP	0.012016	9659	ENSG00000178104
UNC80	0.012016	285175	ENSG00000144406
VPS13A	0.012016	23230	ENSG00000197969
ZNF462	0.012016	58499	ENSG00000148143
ZNF536	0.012016	9745	ENSG00000198597
ANKRD30A	0.0113485	91074	ENSG00000148513
C2orf16	0.0113485	84226	ENSG00000221843
ITPR2	0.0113485	3709	ENSG00000123104
ITSN2	0.0113485	50618	ENSG00000198399
MEFV	0.0113485	4210	ENSG00000103313
SETX	0.0113485	23064	ENSG00000107290
TTC40	0.0113485	54777	ENSG00000171811
WDFY3	0.0113485	23001	ENSG00000163625
CREBBP	0.0106809	1387	ENSG00000005339
CXorf22	0.0106809	170063	ENSG00000165164
FHOD3	0.0106809	80206	ENSG00000134775
MED13	0.0106809	9969	ENSG00000108510
STAB1	0.0106809	23166	ENSG00000010327
GCC2	0.0100134	9648	ENSG00000135968
HIVEP2	0.0100134	3097	ENSG00000010818
NBEAL1	0.0100134	65065	ENSG00000144426
SAGE1	0.0100134	55511	ENSG00000181433
EFCAB5	0.00867824	374786	ENSG00000176927
STARD9	0.00867824	57519	ENSG00000159433
ENAM	0.00801068	10117	ENSG00000132464
NRP1	0.00801068	8829	ENSG00000099250
DDX3X	0.00734312	1654	ENSG00000215301
FRG1	0.00734312	2483	ENSG00000109536
INPPL1	0.00734312	3636	ENSG00000165458
SHROOM3	0.00734312	57619	ENSG00000138771
TANC1	0.00667557	85461	ENSG00000115183
CXCR3	0.00400534	2833	ENSG00000186810
