# Supplementary material for: 3D Functional Genomics Screens Identify CREBBP as a Targetable Driver in Aggressive Triple-Negative Breast Cancer
Source: Oxford University Press journal article supplement (doi:10.1158/0008-5472.can-20-1822), 2021-01-28
Supplement: 00085472can201822-sup-244334_2_supp_6736742_qk2c94.xls [file 00085472can201822-sup-244334_2_supp_6736742_qk2c94.xls]

## Sheet: Sheet1
	Cell line	MCF10a	MCF10a	MCF10NeoT	MCF10NeoT	MCF10AT1	MCF10AT1	MCF10DCIS.com	MCF10DCIS.com	MCF10CA1a	MCF10CA1a	MCF10CA1d	MCF10CA1d	MCF10CA1h	MCF10CA1h
	Condition	2D	3D	2D	3D	2D	3D	2D	3D	2D	3D	2D	3D	2D	3D
siRNA pool		Average Viability (CTG)	Average Viability (CTG)	Average Viability (CTG)	Average Viability (CTG)	Average Viability (CTG)	Average Viability (CTG)	Average Viability (CTG)	Average Viability (CTG)	Average Viability (CTG)	Average Viability (CTG)	Average Viability (CTG)	Average Viability (CTG)	Average Viability (CTG)	Average Viability (CTG)
UBB		0.0362559	0.348489	0.0821464	0.353396	0.303795	0.402387	0.0618618	0.32268	0.310607	0.531139	0.0487222	0.817498	0.0610334	0.442336
PLK1		0.0916109	0.810158	0.190584	0.374079	0.461241	0.371861	0.113851	0.272448	0.186092	0.528721	0.110034	0.899629	0.116971	0.664487
STAB1		0.568739	0.871851	0.71496	0.534539	0.931137	0.524721	0.549456	0.37403	0.793242	0.598057	1.02078	0.896049	0.786122	0.464916
PIK3CA		1.36506	0.572856	1.14763	0.822063	1.02045	0.433347	0.898259	0.261138	0.954697	0.648487	0.838347	0.869705	0.935667	0.742958
SPTA1		0.656144	0.917804	0.57839	0.597594	0.90887	0.368983	0.899169	0.454803	0.852127	0.73701	0.680995	0.699576	0.641407	0.844536
SF3B1		0.124352	0.720354	0.19494	0.599719	0.437518	0.773956	0.21764	0.409104	0.494356	0.808159	0.161396	0.844522	0.287601	0.720575
SHROOM2		1.02074	0.915918	0.803423	0.527135	0.948007	0.668746	1.13724	0.590671	1.10764	0.811544	1.00921	0.905417	0.976714	0.567779
CHD4		0.369942	0.733982	0.723922	0.796657	0.771657	0.520577	0.780158	0.862372	0.747175	0.786182	0.478293	1.02238	0.515319	0.582285
siGENOME Lamin A/C Control		0.454847	0.810213	0.696895	0.522939	0.980931	0.490723	0.881557	0.622807	0.966594	0.919487	0.610359	1.00784	0.67366	0.933354
CXCR3		1.00556	0.539001	0.991357	0.747984	1.04382	0.642946	1.14545	0.836546	1.05553	0.832885	0.935636	1.08195	1.00369	0.702223
TANC1		1.35004	0.621342	0.975428	0.751146	0.98694	0.902159	1.1078	0.714417	0.958819	0.91749	0.980133	0.870207	1.23859	0.647603
ERBB3		0.955001	0.811143	0.882059	0.864951	0.960014	0.615448	0.860724	1.07163	0.843242	0.647936	0.938871	0.947039	0.891117	0.682723
SDK1		0.884151	0.946402	0.975913	0.697652	1.18606	0.91238	1.21125	0.607097	1.23489	0.721328	1.05725	0.959189	1.15333	0.838116
siGENOME Non-targeting Control #1		1.24763	0.795825	0.853107	0.984684	0.883371	0.547588	0.726906	0.664784	1.00694	0.963548	1.05327	1.09155	0.907504	0.72235
CEP350		1.48395	1.1399	1.0945	1.02273	0.920822	0.384752	1.16757	0.7752	0.989152	0.921221	1.11214	1.08498	1.01902	0.614943
CFAP46		0.550368	0.612153	0.810681	0.785023	0.95235	1.26518	1.09751	1.22495	1.14111	0.650772	0.689315	0.867092	0.940297	0.552951
PKHD1L1		0.727055	0.730561	0.97552	1.26209	1.04466	1.02631	1.02257	0.571447	1.125	0.746211	1.16325	0.973132	0.954577	0.781661
MED12		0.808613	0.556727	0.753791	0.487517	0.966831	0.969307	1.04569	1.13035	1.01987	0.760716	1.05755	1.03099	1.01694	1.15814
CDH1		1.0686	0.978339	0.894845	1.16696	0.887741	0.556684	0.774693	0.513763	0.864251	1.03971	0.964028	0.992289	0.864209	0.860974
DNAH10		1.05808	0.761954	1.18979	0.914574	1.0689	0.821434	1.2102	0.934266	1.06426	0.854108	1.13024	1.07482	1.11555	0.986655
MDN1		0.861357	0.739928	0.924454	0.664207	1.04241	1.32719	1.12834	0.853788	1.14615	0.886765	1.18919	0.97268	0.96078	1.01053
HERC2		1.43814	0.833103	1.31592	1.5108	1.15755	0.883636	1.14647	0.624537	1.30904	0.884126	1.11601	1.04224	1.36196	0.772599
FLG2		0.960796	0.55776	1.01504	0.928402	0.958399	1.49885	1.0017	1.22358	0.989896	0.751847	1.19879	1.05679	1.05415	0.632381
UNC80		1.03925	0.935173	0.907449	1.34017	1.06081	0.930213	1.19277	0.934338	0.968664	0.802318	1.05638	0.92594	1.0428	0.825313
SZT2		0.996096	1.20635	1.16119	0.790777	1.03986	0.687466	1.11361	1.32931	1.04664	1.00362	1.1365	0.812409	1.07673	0.931528
SPHKAP		0.476977	1.02227	0.77764	0.929281	0.884389	1.41	0.752863	0.600594	1.03533	0.816348	0.665823	1.06226	0.714075	1.06974
WDFY3		1.40332	1.10315	1.11277	1.17145	1.03608	1.31104	1.27331	0.852143	0.952068	1.00497	1.07695	0.884364	1.22127	1.01596
DDX3X		1.01755	1.1789	0.799626	0.949202	1.06024	1.1252	1.1825	1.34485	0.849908	0.726361	0.895474	1.07096	0.863115	0.996595
siGENOME Non-targeting Control #2		1.51791	1.36864	1.11964	1.493	0.98866	0.932598	1.07239	0.870669	1.05463	0.992891	0.972901	0.959618	1.08458	1.05054
DMD		1.64025	1.20168	1.55469	1.547	1.10278	0.453242	1.09782	1.79086	1.1318	0.914568	1.16422	1.03104	1.09671	0.742714
DNAH6		0.967492	0.959211	1.20631	0.992985	1.11467	1.15551	1.41561	1.251	1.09921	1.11731	1.24494	1.11844	1.16805	1.16288
BIRC6		1.80068	1.00683	1.19647	1.53849	1.00455	1.10202	1.29679	0.861215	1.07243	1.01747	1.23225	1.12909	1.13591	1.21828
RYR2		1.55811	1.70082	1.33286	1.94075	1.12604	0.54554	1.36985	0.949665	1.17454	0.853488	1.34069	0.989945	1.0488	0.905355
FAT3		1.48583	1.12164	1.2644	1.38009	0.951354	1.06225	0.792358	1.10108	1.00079	1.19132	0.951972	0.989448	1.17875	1.12289
NIPBL		0.826751	0.918484	0.671107	0.417892	0.864576	1.08062	0.885031	0.326337	0.925675	1.60114	0.954069	0.941904	0.954825	2.785
CACNA1F		0.725049	1.07167	1.08944	1.25482	0.905856	0.84159	0.92541	1.65341	0.962437	1.16661	1.07515	1.08028	0.822805	1.01076
MGAM		0.959316	0.677457	1.08383	0.825088	1.12719	2.26345	1.05907	0.661213	1.14268	1.25433	1.07043	1.01379	1.1109	1.45743
KIF4A		0.918226	1.40271	0.993295	1.61541	1.00461	1.05562	1.13942	1.29338	1.06467	0.896128	1.10224	0.975671	1.1168	0.924231
DYNC1H1		1.46219	1.03478	1.12243	1.49915	1.31084	1.17329	1.54322	1.75905	1.46483	0.944637	1.19642	0.956177	1.23423	0.904482
HECW1		2.21263	1.00558	1.47933	1.8809	1.1152	1.1635	1.16271	1.07016	1.1774	1.2498	1.07287	1.05063	1.2983	0.92934
PTEN		0.850029	1.70682	1.14498	1.31361	1.04188	1.02458	1.02084	1.33238	1.15136	1.11542	0.960495	0.870794	0.956753	1.04901
COL14A1		0.724388	1.42032	1.05012	1.54444	1.03334	0.784322	1.14142	0.904696	1.30286	1.33257	0.871379	0.989312	0.988627	1.44263
MEFV		0.765714	1.26833	0.950046	1.16115	0.954063	1.10772	0.774126	1.61772	0.960604	1.18429	1.05245	0.961912	0.936128	1.20483
MAP3K1		1.33038	0.969764	1.11341	1.05328	1.09997	1.54255	1.18101	1.36767	1.05075	1.02386	1.41266	1.15239	1.06418	1.42475
RB1		1.81726	1.41425	1.21663	0.950452	1.03406	1.1601	1.00475	1.35381	1.07465	1.52414	1.01504	1.05409	1.02936	1.1499
MUC17		0.879945	1.52723	1.15156	1.51617	1.0701	1.19789	0.93113	1.0221	0.990254	0.998206	0.945382	1.00768	1.06496	1.34929
MACF1		0.328686	0.996445	0.447885	0.589158	0.994013	2.38662	0.817184	0.882369	0.862826	1.65747	0.694311	1.07294	0.583614	1.49636
DIDO1		0.633736	1.22213	1.03258	1.24593	1.11393	0.886455	1.00969	2.41205	1.10363	1.11425	0.864943	1.07279	0.864897	1.1946
KIAA1210		1.46822	1.42324	1.16507	1.43088	1.09563	1.2147	1.22429	1.7343	1.18874	1.19611	1.16881	0.9877	1.31492	1.22951
EFCAB5		1.62352	1.15633	1.28437	1.55038	1.01927	1.57763	1.07992	1.51742	1.03295	1.1145	1.01091	1.11851	1.11815	1.42517
GAPDH		1.42366	1.32012	0.875179	1.36848	1.14489	1.54031	0.996893	1.67521	0.861502	1.25402	0.985457	0.970674	0.942355	1.60024
FMN2		2.1006	1.05646	1.24762	1.98487	1.04067	0.808933	0.951091	1.65998	1.05841	1.61684	1.17893	1.13796	1.02232	1.48588
DMXL2		1.31165	1.13872	1.27621	1.4125	1.01762	0.860511	1.02884	2.13607	1.00363	1.57375	0.984598	1.17084	1.01133	1.86327
ARID1B		0.56062	1.04285	0.600278	0.941566	0.876478	2.25416	1.00139	1.21234	0.905326	1.4849	0.761756	1.0384	0.686642	2.18405
ACSS2		1.36516	2.08868	0.864793	1.38384	1.04191	1.49536	1.48951	1.48264	0.987235	1.3138	0.919342	1.02344	1.03611	1.53754
ENAM		1.41962	1.43168	1.27201	1.72334	1.01867	1.58445	0.9332	1.62379	1.03659	1.37353	0.959283	1.07136	1.10194	1.78132
NF1		1.43566	1.72731	1.12255	1.79963	1.09017	1.28615	1.05889	1.52201	0.981764	1.38525	1.0766	1.08219	1.11383	2.19027
KMT2C		1.29371	1.81975	0.825308	1.18116	1.06745	1.60571	1.03117	0.86732	0.86339	1.63097	1.00034	1.01071	0.956528	3.00636
CREBBP		0.710905	1.51444	1.08205	0.916739	1.09131	2.29671	1.34864	2.27772	0.975785	1.21068	1.03439	0.950599	0.995325	2.8923
FOXA1		0.565037	0.892818	0.651414	1.10454	0.83315	1.59605	0.6155	2.51524	1.11907	2.98712	0.726244	1.00646	0.721812	3.08783
