# Supplementary material for: 3D Functional Genomics Screens Identify CREBBP as a Targetable Driver in Aggressive Triple-Negative Breast Cancer
Source: Oxford University Press journal article supplement (doi:10.1158/0008-5472.can-20-1822), 2021-01-28
Supplement: 00085472can201822-sup-244334_2_supp_6736744_qk2c94.xls [file 00085472can201822-sup-244334_2_supp_6736744_qk2c94.xls]

## Sheet: TNBC Pheno data
Patient ID	Profiled in Mutations	Profiled in Putative copy-number alterations from GISTIC	CREBBPalterations
TCGA-A7-A26I	Yes	Yes	Deep Deletion
TCGA-BH-A1F6	Yes	Yes	Deep Deletion
TCGA-E2-A158	Yes	Yes	Deep Deletion
TCGA-OL-A6VO		Yes	Deep Deletion
TCGA-D8-A1XK	Yes	Yes	Shallow Deletion
TCGA-A1-A0SK	Yes	Yes	Shallow Deletion
TCGA-A1-A0SO	Yes	Yes	Shallow Deletion
TCGA-A2-A0D0	Yes	Yes	Shallow Deletion
TCGA-A2-A0SX	Yes	Yes	Shallow Deletion
TCGA-A2-A3XT	Yes	Yes	Shallow Deletion
TCGA-A2-A04T	Yes	Yes	Shallow Deletion
TCGA-A2-A04U	Yes	Yes	Shallow Deletion
TCGA-A7-A0CE	Yes	Yes	Shallow Deletion
TCGA-A7-A4SD	Yes	Yes	Shallow Deletion
TCGA-A8-A07R	Yes	Yes	Shallow Deletion
TCGA-AC-A2BK	Yes	Yes	Shallow Deletion
TCGA-AC-A6IW		Yes	Shallow Deletion
TCGA-AN-A0AL	Yes	Yes	Shallow Deletion
TCGA-AN-A0FJ	Yes	Yes	Shallow Deletion
TCGA-AO-A0J6	Yes	Yes	Shallow Deletion
TCGA-AO-A129	Yes	Yes	Shallow Deletion
TCGA-AQ-A54N	Yes	Yes	Shallow Deletion
TCGA-AR-A1AH	Yes	Yes	Shallow Deletion
TCGA-AR-A1AQ	Yes	Yes	Shallow Deletion
TCGA-AR-A2LR	Yes	Yes	Shallow Deletion
TCGA-BH-A0E0	Yes	Yes	Shallow Deletion
TCGA-C8-A27B	Yes	Yes	Shallow Deletion
TCGA-D8-A27F	Yes	Yes	Shallow Deletion
TCGA-D8-A147	Yes	Yes	Shallow Deletion
TCGA-E2-A1AZ	Yes	Yes	Shallow Deletion
TCGA-E2-A1L7	Yes	Yes	Shallow Deletion
TCGA-E2-A1LK	Yes	Yes	Shallow Deletion
TCGA-E2-A159	Yes	Yes	Shallow Deletion
TCGA-E2-A574	Yes	Yes	Shallow Deletion
TCGA-E9-A1N8	Yes	Yes	Shallow Deletion
TCGA-E9-A1ND	Yes	Yes	Shallow Deletion
TCGA-E9-A22G	Yes	Yes	Shallow Deletion
TCGA-EW-A1P8	Yes	Yes	Shallow Deletion
TCGA-GM-A2DH	Yes	Yes	Shallow Deletion
TCGA-GM-A3XL	Yes	Yes	Shallow Deletion
TCGA-HN-A2NL	Yes	Yes	Shallow Deletion
TCGA-OL-A5D7	Yes	Yes	Shallow Deletion
TCGA-OL-A5RW	Yes	Yes	Shallow Deletion
TCGA-PL-A8LV		Yes	Shallow Deletion
TCGA-S3-AA10		Yes	Shallow Deletion
TCGA-AN-A0AR	Yes	Yes	WT
TCGA-AN-A0AT	Yes	Yes	WT
TCGA-AO-A128	Yes	Yes	WT
TCGA-D8-A1XQ	Yes	Yes	WT
TCGA-D8-A27H	Yes	Yes	WT
TCGA-A2-A0CM	Yes	Yes	WT
TCGA-A2-A0D2	Yes	Yes	WT
TCGA-A2-A0EQ	Yes	Yes	WT
TCGA-A2-A0ST	Yes	Yes	WT
TCGA-A2-A0T0	Yes	Yes	WT
TCGA-A2-A0T2	Yes	Yes	WT
TCGA-A2-A0YE	Yes	Yes	WT
TCGA-A2-A0YM	Yes	Yes	WT
TCGA-A2-A1G6	Yes	Yes	WT
TCGA-A2-A3XU	Yes	Yes	WT
TCGA-A2-A3XX	Yes	Yes	WT
TCGA-A2-A04P	Yes	Yes	WT
TCGA-A7-A0DA	Yes	Yes	WT
TCGA-A7-A4SE	Yes	Yes	WT
TCGA-A7-A5ZV	Yes	Yes	WT
TCGA-A7-A26F	Yes	Yes	WT
TCGA-A7-A26G	Yes	Yes	WT
TCGA-A8-A07O	Yes	Yes	WT
TCGA-AC-A2QJ	Yes	Yes	WT
TCGA-AN-A0FL	Yes	Yes	WT
TCGA-AN-A0FX	Yes	Yes	WT
TCGA-AN-A0XU	Yes	Yes	WT
TCGA-AN-A04D	Yes	Yes	WT
TCGA-AO-A0J2	Yes	Yes	WT
TCGA-AO-A1KR	Yes	Yes	WT
TCGA-AO-A03U	Yes	Yes	WT
TCGA-AO-A12F	Yes	Yes	WT
TCGA-AO-A124	Yes	Yes	WT
TCGA-AR-A0TS	Yes	Yes	WT
TCGA-AR-A0U0	Yes	Yes	WT
TCGA-AR-A1AI	Yes	Yes	WT
TCGA-AR-A1AJ	Yes	Yes	WT
TCGA-AR-A1AO	Yes	Yes	WT
TCGA-AR-A1AY	Yes	Yes	WT
TCGA-AR-A2LH	Yes	Yes	WT
TCGA-AR-A5QQ	Yes	Yes	WT
TCGA-AR-A256	Yes	Yes	WT
TCGA-B6-A0I2	Yes	Yes	WT
TCGA-B6-A0IQ	Yes	Yes	WT
TCGA-B6-A0RT	Yes	Yes	WT
TCGA-B6-A0RU	Yes	Yes	WT
TCGA-B6-A0WX	Yes	Yes	WT
TCGA-BH-A0AV	Yes	Yes	WT
TCGA-BH-A0B3	Yes	Yes	WT
TCGA-BH-A0B9	Yes	Yes	WT
TCGA-BH-A0BW	Yes	Yes	WT
TCGA-BH-A0E6	Yes	Yes	WT
TCGA-BH-A1EW	Yes	Yes	WT
TCGA-BH-A1FC	Yes	Yes	WT
TCGA-BH-A18G	Yes	Yes	WT
TCGA-BH-A18Q	Yes	Yes	WT
TCGA-BH-A18T	Yes	Yes	WT
TCGA-BH-A18V	Yes	Yes	WT
TCGA-BH-A42U	Yes	Yes	WT
TCGA-C8-A1HJ	Yes	Yes	WT
TCGA-C8-A3M7	Yes	Yes	WT
TCGA-C8-A12K	Yes	Yes	WT
TCGA-C8-A12V	Yes	Yes	WT
TCGA-C8-A26X	Yes	Yes	WT
TCGA-C8-A26Y	Yes	Yes	WT
TCGA-C8-A131	Yes	Yes	WT
TCGA-C8-A134	Yes	Yes	WT
TCGA-D8-A1JF	Yes	Yes	WT
TCGA-D8-A1JG	Yes	Yes	WT
TCGA-D8-A1JL	Yes	Yes	WT
TCGA-D8-A13Z	Yes	Yes	WT
TCGA-D8-A27M	Yes	Yes	WT
TCGA-D8-A142	Yes	Yes	WT
TCGA-D8-A143	Yes	Yes	WT
TCGA-E2-A1B6	Yes	Yes	WT
TCGA-E2-A1LG	Yes	Yes	WT
TCGA-E2-A1LL	Yes	Yes	WT
TCGA-E2-A14N	Yes	Yes	WT
TCGA-E2-A150	Yes	Yes	WT
TCGA-E9-A1RH	Yes	Yes	WT
TCGA-E9-A5FL	Yes	Yes	WT
TCGA-E9-A244	Yes	Yes	WT
TCGA-EW-A1OV	Yes	Yes	WT
TCGA-EW-A1P1	Yes	Yes	WT
TCGA-EW-A1P4	Yes	Yes	WT
TCGA-EW-A1PB	Yes	Yes	WT
TCGA-EW-A3U0	Yes	Yes	WT
TCGA-GI-A2C9	Yes	Yes	WT
TCGA-GM-A2DB	Yes	Yes	WT
TCGA-GM-A2DD	Yes	Yes	WT
TCGA-GM-A2DF	Yes	Yes	WT
TCGA-GM-A2DI	Yes	Yes	WT
TCGA-LL-A5YO	Yes	Yes	WT
TCGA-LL-A441	Yes	Yes	WT
TCGA-OL-A66I	Yes	Yes	WT

## Sheet: TNBC GEX enrichment
Gene	Cytoband	Altered group	Unaltered group	Altered group	Unaltered group	Log Ratio	p-Value	q-Value	Tendency
JPT2	16p13.3	11.55	12.06	0.46	0.57	-0.51	1.7e-07	0.002338	Under-expressed
MFSD5	12q13.13	9.13	9.54	0.38	0.49	-0.41	4.07e-07	0.002349	Under-expressed
MSRB1	16p13.3	8.54	9.39	0.84	0.93	-0.85	5.12e-07	0.002349	Under-expressed
UBE2I	16p13.3	10.95	11.35	0.4	0.47	-0.41	8.68e-07	0.002561	Under-expressed
PLVAP	19p13.11	10.21	10.95	0.72	0.9	-0.74	1.082e-06	0.002561	Under-expressed
SLX4	16p13.3	7.55	8.03	0.48	0.56	-0.47	1.29e-06	0.002561	Under-expressed
TNS2	12q13.13	9.09	9.77	0.68	0.86	-0.68	1.659e-06	0.002561	Under-expressed
MCM2	3q21.3	11.35	10.65	0.68	0.93	0.7	1.786e-06	0.002561	Over-expressed
LDB2	4p15.32	6.6	7.55	1.03	1	-0.95	1.812e-06	0.002561	Under-expressed
NUDT16L1	16p13.3	8.48	9.02	0.57	0.63	-0.55	1.86e-06	0.002561	Under-expressed
ZG16B	16p13.3	5.67	8.02	2.36	3.02	-2.35	2.128e-06	0.002664	Under-expressed
ZSCAN32	16p13.3	8.02	8.35	0.36	0.38	-0.33	2.752e-06	0.003158	Under-expressed
CDK1	10q21.2	10.78	10.07	0.69	0.98	0.71	3.203e-06	0.003199	Over-expressed
CAPN11	6p21.1	1.44	2.68	1.27	1.63	-1.24	3.252e-06	0.003199	Under-expressed
GNG11	7q21.3	7.76	8.53	0.79	1.06	-0.78	3.945e-06	0.003622	Under-expressed
HASPIN	17p13.2	7.07	6.4	0.62	1.03	0.67	4.566e-06	0.00393	Over-expressed
LINC01184	5q23.3	7.9	8.44	0.51	0.82	-0.54	5.174e-06	0.004148	Under-expressed
C16ORF72	16p13.2	9.75	10.21	0.55	0.41	-0.46	5.639e-06	0.004148	Under-expressed
NOSTRIN	2q24.3	4.96	6.33	1.54	1.68	-1.38	6.212e-06	0.004148	Under-expressed
CTSO	4q32.1	8.85	9.6	0.89	0.77	-0.75	6.354e-06	0.004148	Under-expressed
ALG1	16p13.3	8.75	9.22	0.56	0.48	-0.47	6.471e-06	0.004148	Under-expressed
ECSCR	5q31.2	4.99	5.88	0.96	1.18	-0.89	6.627e-06	0.004148	Under-expressed
SPARCL1	4q22.1	10.53	11.56	1.16	1.27	-1.03	7.641e-06	0.004574	Under-expressed
HMOX2	16p13.3	9.63	10.16	0.62	0.63	-0.53	8.228e-06	0.004721	Under-expressed
TSC2	16p13.3	10.17	10.56	0.46	0.47	-0.4	9.665e-06	0.005098	Under-expressed
SEMA3G	3p21.1	6.75	7.81	1.2	1.36	-1.06	9.707e-06	0.005098	Under-expressed
ABAT	16p13.2	6.28	7.38	1.26	1.38	-1.1	1.007e-05	0.005098	Under-expressed
SIDT1	3q13.2	5.17	6.88	2	2.06	-1.71	1.046e-05	0.005098	Under-expressed
NAA60	16p13.3	9.93	10.31	0.44	0.46	-0.38	1.093e-05	0.005098	Under-expressed
TK2	16q21	8.75	9.22	0.52	0.65	-0.47	1.111e-05	0.005098	Under-expressed
SKA1	18q21.1	8.58	7.87	0.68	1.15	0.71	1.16e-05	0.005152	Over-expressed
ZNF213	16p13.3	8.87	9.33	0.55	0.54	-0.46	1.225e-05	0.005272	Under-expressed
FAM83D	20q11.23	9.75	9.04	0.61	1.25	0.71	1.42e-05	0.005839	Over-expressed
GLYR1	16p13.3	10.63	11.04	0.51	0.46	-0.41	1.442e-05	0.005839	Under-expressed
KHK	2p23.3	7.76	7.01	0.91	0.91	0.75	1.623e-05	0.006385	Over-expressed
RAPGEF3	12q13.11	6.17	7	0.89	1.26	-0.83	1.734e-05	0.006633	Under-expressed
NUF2	1q23.3	9.57	8.82	0.66	1.31	0.74	1.798e-05	0.006691	Over-expressed
PLPP1	5q11.2	8.53	9.17	0.71	0.94	-0.64	1.879e-05	0.006747	Under-expressed
UBXN2A	2p23.3	9.11	8.66	0.56	0.52	0.45	1.955e-05	0.006747	Over-expressed
SH2D3C	9q34.11	7.52	8.22	0.8	0.98	-0.7	2e-05	0.006747	Under-expressed
LHFPL6	13q13.3-q14.11	8.15	8.91	0.91	1	-0.77	2.083e-05	0.006747	Under-expressed
S1PR1	1p21.2	7.64	8.54	1.08	1.14	-0.89	2.106e-05	0.006747	Under-expressed
ZNF597	16p13.3	3.87	5.23	1.77	1.33	-1.36	2.107e-05	0.006747	Under-expressed
CENPA	2p23.3	8.7	8	0.65	1.23	0.7	2.177e-05	0.006813	Over-expressed
GPRIN2	10q11.22	8.5	7.05	1.61	2.15	1.44	2.229e-05	0.006822	Over-expressed
SNAP23	15q15.1-q15.2	9.74	10.15	0.49	0.54	-0.41	2.49e-05	0.007215	Under-expressed
TMEM154	4q31.3	6.47	7.37	1.05	1.26	-0.9	2.602e-05	0.007215	Under-expressed
CLDN5	22q11.21	5.53	6.64	1.17	1.78	-1.11	2.632e-05	0.007215	Under-expressed
CEP57	11q21	10.15	9.7	0.57	0.51	0.45	2.708e-05	0.007215	Over-expressed
YEATS2	3q27.1	11	10.53	0.54	0.64	0.46	2.71e-05	0.007215	Over-expressed
KLF2	19p13.11	7.56	8.29	0.76	1.2	-0.73	2.75e-05	0.007215	Under-expressed
SLC9A3R2	16p13.3	9.38	10.13	0.94	0.97	-0.76	2.773e-05	0.007215	Under-expressed
CD34	1q32.2	9.25	9.95	0.86	0.91	-0.7	2.777e-05	0.007215	Under-expressed
PECAM1	17q23.3	9.29	9.96	0.81	0.9	-0.67	2.847e-05	0.00726	Under-expressed
ESAM	11q24.2	8.3	8.95	0.79	0.88	-0.65	3.018e-05	0.007529	Under-expressed
ROBO4	11q24.2	7.71	8.41	0.87	0.9	-0.7	3.22e-05	0.007529	Under-expressed
OLFML3	1p13.2	8.86	9.8	1.11	1.37	-0.95	3.249e-05	0.007529	Under-expressed
ZNF263	16p13.3	9.3	9.58	0.36	0.35	-0.28	3.295e-05	0.007529	Under-expressed
MYH14	19q13.33	11.54	10.31	0.98	2.37	1.22	3.309e-05	0.007529	Over-expressed
FAM124B	2q36.2	3.91	4.83	1.11	1.3	-0.92	3.481e-05	0.007529	Under-expressed
EBF1	5q33.3	6.2	7.14	1.17	1.22	-0.93	3.497e-05	0.007529	Under-expressed
KIF18B	17q21.31	9.04	8.35	0.65	1.26	0.69	3.543e-05	0.007529	Over-expressed
CHAF1B	21q22.12-q22.13	9.51	8.93	0.65	0.91	0.58	3.581e-05	0.007529	Over-expressed
GTSE1	22q13.31	9.13	8.45	0.81	1	0.68	3.596e-05	0.007529	Over-expressed
GART	21q22.11	11.33	10.92	0.47	0.63	0.41	3.602e-05	0.007529	Over-expressed
DCUN1D3	16p12.3	7.02	7.43	0.52	0.54	-0.42	3.609e-05	0.007529	Under-expressed
COQ7	16p12.3	8.05	8.48	0.54	0.55	-0.43	3.696e-05	0.007596	Under-expressed
SUV39H2	10p13	9.14	8.57	0.68	0.85	0.58	3.792e-05	0.007678	Over-expressed
LITAF	16p13.13	11.72	12.31	0.78	0.68	-0.59	3.983e-05	0.007949	Under-expressed
ORAI3	16p11.2	8.02	8.54	0.54	0.89	-0.52	4.083e-05	0.008031	Under-expressed
ENG	9q34.11	10.8	11.44	0.83	0.77	-0.64	4.266e-05	0.008274	Under-expressed
CLEC14A	14q21.1	7.41	8.13	0.87	1.06	-0.72	4.548e-05	0.008697	Under-expressed
ARL15	5q11.2	6.91	7.61	0.9	0.93	-0.71	4.714e-05	0.008873	Under-expressed
DNASE1	16p13.3	5.62	6.3	0.89	0.87	-0.68	4.768e-05	0.008873	Under-expressed
MELK	9p13.2	9.95	9.22	0.78	1.25	0.73	4.855e-05	0.008914	Over-expressed
CREBBP	16p13.3	10.75	11.25	0.67	0.57	-0.5	4.923e-05	0.008919	Under-expressed
THSD1	13q14.3	5.52	6.21	0.84	1	-0.69	5.04e-05	0.009013	Under-expressed
HYAL2	3p21.31	9.9	10.34	0.51	0.69	-0.44	5.112e-05	0.009024	Under-expressed
CDCA5	11q13.1	10.24	9.61	0.7	1.05	0.63	5.376e-05	0.009139	Over-expressed
TFCP2L1	2q14.2	10.77	9.47	1.39	2.24	1.3	5.415e-05	0.009139	Over-expressed
DNA2	10q21.3	8.29	7.5	0.99	1.13	0.79	5.528e-05	0.009139	Over-expressed
DEPTOR	8q24.12	7.87	8.77	1.1	1.32	-0.9	5.532e-05	0.009139	Under-expressed
CCSAP	1q42.13	9.65	9.12	0.68	0.68	0.52	5.699e-05	0.009139	Over-expressed
RAD54L	1p34.1	8.75	8.06	0.77	1.14	0.69	5.704e-05	0.009139	Over-expressed
SASS6	1p21.2	8.18	7.7	0.53	0.8	0.48	5.728e-05	0.009139	Over-expressed
MYCT1	6q25.2	6.17	7.01	1.09	1.11	-0.84	5.731e-05	0.009139	Under-expressed
FBXO8	4q34.1	8.05	8.41	0.44	0.54	-0.36	5.774e-05	0.009139	Under-expressed
KCTD5	16p13.3	9.78	10.16	0.47	0.54	-0.38	5.917e-05	0.009147	Under-expressed
LYRM1	16p12.3	8.49	8.92	0.57	0.54	-0.43	5.948e-05	0.009147	Under-expressed
DIPK2B	Xp11.3	7.55	8.27	0.88	1.03	-0.71	6.002e-05	0.009147	Under-expressed
MSH2	2p21-p16.3	10.86	10.34	0.66	0.75	0.53	6.045e-05	0.009147	Over-expressed
TBC1D24	16p13.3	8.32	8.88	0.66	0.89	-0.56	6.372e-05	0.009538	Under-expressed
CDCA7	2q31.1	9.43	8.65	0.92	1.26	0.78	6.474e-05	0.009586	Over-expressed
PSIP1	9p22.3	11.11	10.44	0.89	0.9	0.67	6.822e-05	0.009926	Over-expressed
CDC42EP5	19q13.42	5.32	6.27	1.14	1.48	-0.95	6.848e-05	0.009926	Under-expressed
GNA14	9q21.2	3.88	5.01	1.42	1.66	-1.13	7.134e-05	0.0102	Under-expressed
ERGIC1	5q35.1	11.39	11.82	0.5	0.7	-0.43	7.33e-05	0.0104	Under-expressed
MCM7	7q22.1	12.27	11.77	0.65	0.72	0.5	7.405e-05	0.0104	Over-expressed
KNOP1	16p12.3	8.93	9.33	0.53	0.52	-0.4	7.509e-05	0.0104	Under-expressed
PMM2	16p13.2	9.93	10.35	0.56	0.55	-0.42	7.611e-05	0.0105	Under-expressed
TIE1	1p34.2	7.85	8.58	0.94	1.05	-0.73	7.825e-05	0.0106	Under-expressed
PDE1A	2q32.1	4.04	5.09	1.44	1.31	-1.06	7.866e-05	0.0106	Under-expressed
SCARB2	4q21.1	12.08	12.49	0.54	0.58	-0.41	7.933e-05	0.0106	Under-expressed
EMCN	4q24	6.77	7.65	1.14	1.26	-0.88	8.023e-05	0.0106	Under-expressed
TNFAIP1	17q11.2	10.11	10.46	0.45	0.49	-0.35	8.217e-05	0.0108	Under-expressed
PDE7B	6q23.3	4.76	5.76	1.37	1.25	-1	8.412e-05	0.0109	Under-expressed
FLYWCH1	16p13.3	8.34	8.89	0.75	0.73	-0.56	8.669e-05	0.0112	Under-expressed
E2F7	12q21.2	7.56	6.66	1.1	1.41	0.9	8.804e-05	0.0112	Over-expressed
PLEKHG4	16q22.1	8.99	8.1	0.99	1.61	0.9	9.281e-05	0.0117	Over-expressed
SLC4A2	7q36.1	11.26	10.82	0.55	0.67	0.43	9.665e-05	0.0121	Over-expressed
CREB3L1	11p11.2	7.99	8.95	1.25	1.38	-0.95	9.844e-05	0.0122	Under-expressed
FZD4	11q14.2	8.57	9.29	0.93	1.08	-0.72	9.918e-05	0.0122	Under-expressed
EHD4	15q15.1	9.93	10.29	0.47	0.53	-0.36	0.0001004	0.0122	Under-expressed
LIN9	1q42.12	8.64	8.07	0.67	0.94	0.56	0.0001009	0.0122	Over-expressed
HSPA14	10p13	10.16	9.7	0.6	0.69	0.46	0.0001039	0.0123	Over-expressed
ARHGEF15	17p13.1	6.8	7.56	0.97	1.15	-0.76	0.0001039	0.0123	Under-expressed
CNRIP1	2p14	6.23	6.95	0.96	0.99	-0.71	0.0001057	0.0124	Under-expressed
NUBP1	16p13.13	8.34	8.77	0.56	0.65	-0.43	0.0001089	0.0126	Under-expressed
COG7	16p12.2	8.88	9.25	0.53	0.41	-0.37	0.0001092	0.0126	Under-expressed
FOXP1	3p13	9.39	9.93	0.72	0.78	-0.54	0.0001104	0.0127	Under-expressed
TSPAN7	Xp11.4	6.25	7.43	1.6	1.6	-1.17	0.0001136	0.0129	Under-expressed
CLEC3B	3p21.31	5.56	6.56	1.27	1.58	-1	0.0001152	0.013	Under-expressed
STMN1	1p36.11	13.27	12.67	0.71	1.02	0.6	0.000117	0.0131	Over-expressed
RND1	12q13.12	5.17	6.42	1.51	2.12	-1.25	0.0001207	0.0133	Under-expressed
LMF1	16p13.3	7.28	7.99	0.98	0.96	-0.71	0.0001212	0.0133	Under-expressed
PTPRB	12q15	7.5	8.38	1.21	1.23	-0.88	0.000123	0.0133	Under-expressed
NDN	15q11.2	6.62	7.62	1.39	1.32	-1	0.000123	0.0133	Under-expressed
CCDC138	2q13	6.97	6.32	0.87	0.99	0.66	0.000127	0.0136	Over-expressed
SOX17	8q11.23	4.75	5.47	0.88	1.24	-0.72	0.0001272	0.0136	Under-expressed
C5ORF34	5p12	7.08	6.49	0.79	0.87	0.59	0.0001328	0.014	Over-expressed
AUNIP	1p36.11	7.6	7.01	0.67	1.1	0.6	0.0001329	0.014	Over-expressed
MEIS3	19q13.32	6.15	7.24	1.5	1.5	-1.09	0.0001342	0.014	Under-expressed
PSRC1	1p13.3	8.77	8.17	0.72	1.02	0.59	0.0001363	0.0141	Over-expressed
POLQ	3q13.33	8.21	7.59	0.72	1.1	0.62	0.0001375	0.0141	Over-expressed
SIM2	21q22.13	8.05	6.82	1.61	1.95	1.24	0.000144	0.0147	Over-expressed
DONSON	21q22.11	9.31	8.74	0.78	0.82	0.57	0.0001483	0.0149	Over-expressed
LRRC70	5q12.1	3.96	4.65	0.83	1.21	-0.69	0.0001508	0.0149	Under-expressed
CLEC16A	16p13.13	9.17	9.6	0.62	0.56	-0.43	0.0001527	0.0149	Under-expressed
SELENOP	5p12	10.39	11.46	1.48	1.49	-1.06	0.0001531	0.0149	Under-expressed
ANP32E	1q21.2	12	11.32	0.75	1.3	0.68	0.0001549	0.0149	Over-expressed
THUMPD1	16p12.3	10.03	10.41	0.54	0.53	-0.39	0.0001554	0.0149	Under-expressed
RAB26	16p13.3	4.1	5.25	1.54	1.74	-1.15	0.0001559	0.0149	Under-expressed
CAVIN2	2q32.3	5.07	6.21	1.56	1.68	-1.14	0.0001565	0.0149	Under-expressed
RBBP7	Xp22.2	11.95	11.56	0.53	0.6	0.4	0.0001573	0.0149	Over-expressed
ERG	21q22.2	7.01	7.8	1.11	1.1	-0.79	0.0001577	0.0149	Under-expressed
C1QTNF7	4p15.32	1.79	3.04	1.67	1.92	-1.25	0.0001582	0.0149	Under-expressed
SLCO2A1	3q22.1-q22.2	7.64	8.67	1.48	1.35	-1.03	0.0001606	0.015	Under-expressed
KLHL15	Xp22.11	8.58	8.08	0.69	0.72	0.5	0.0001628	0.0151	Over-expressed
KCNE4	2q36.1	6.42	7.32	1.24	1.3	-0.9	0.0001678	0.0155	Under-expressed
YIPF1	1p32.3	9.33	9.68	0.46	0.56	-0.35	0.0001706	0.0157	Under-expressed
FAM13C	10q21.1	4.53	5.53	1.46	1.28	-1	0.0001746	0.0157	Under-expressed
HTRA1	10q26.13	10.52	11.39	1.24	1.18	-0.87	0.000177	0.0157	Under-expressed
CCM2L	20q11.21	4.96	5.74	1.05	1.18	-0.78	0.0001772	0.0157	Under-expressed
TEK	9p21.2	6.31	7.28	1.41	1.28	-0.98	0.0001775	0.0157	Under-expressed
IL1R1	2q11.2-q12.1	9.77	10.47	1.02	0.91	-0.7	0.0001776	0.0157	Under-expressed
ATP6V0C	16p13.3	11.03	11.51	0.64	0.73	-0.47	0.0001787	0.0157	Under-expressed
RFC4	3q27.3	9.83	9.22	0.88	0.8	0.61	0.0001789	0.0157	Over-expressed
MGRN1	16p13.3	10.27	10.67	0.58	0.51	-0.4	0.0001814	0.0158	Under-expressed
CCDC32	15q15.1	7.82	8.24	0.57	0.63	-0.41	0.0001819	0.0158	Under-expressed
ABCG2	4q22.1	4.02	4.99	1.34	1.43	-0.97	0.0001835	0.0158	Under-expressed
FAM234A	16p13.3	10.57	11.12	0.83	0.61	-0.55	0.0001855	0.0158	Under-expressed
SCML2	Xp22.13	7.39	6.44	1.22	1.58	0.95	0.000186	0.0158	Over-expressed
METTL22	16p13.2	6.94	7.3	0.5	0.53	-0.36	0.0001872	0.0158	Under-expressed
SPCS3	4q34.2	10.88	11.27	0.56	0.53	-0.39	0.0001897	0.0159	Under-expressed
REEP6	19p13.3	5.75	7.41	2.21	2.66	-1.66	0.0001928	0.0161	Under-expressed
ADGRL4	1p31.1	8.02	8.79	1.13	0.98	-0.77	0.0001964	0.0162	Under-expressed
RHBDF1	16p13.3	9.16	9.75	0.9	0.66	-0.59	0.0001969	0.0162	Under-expressed
HSPA12B	20p13	6.09	6.82	0.99	1.14	-0.73	0.0001988	0.0162	Under-expressed
REEP2	5q31.2	6.47	5.28	1.67	1.77	1.2	0.0001991	0.0162	Over-expressed
TMEM204	16p13.3	7.04	7.73	0.99	0.99	-0.69	0.0002016	0.0163	Under-expressed
BUB1	2q13	10.23	9.58	0.78	1.2	0.65	0.0002019	0.0163	Over-expressed
HSD17B11	4q22.1	7.81	8.46	0.84	1.1	-0.65	0.000204	0.0163	Under-expressed
DDIAS	11q14.1	8.3	7.73	0.76	0.93	0.57	0.000205	0.0163	Over-expressed
CDK16	Xp11.3	11.94	11.5	0.64	0.59	0.44	0.0002066	0.0163	Over-expressed
RHEB	7q36.1	10.97	10.6	0.5	0.58	0.37	0.0002071	0.0163	Over-expressed
EARS2	16p12.2	9.11	9.51	0.61	0.42	-0.4	0.0002083	0.0163	Under-expressed
PRKX	Xp22.33	10.82	10.27	0.78	0.85	0.56	0.0002103	0.0164	Over-expressed
CASTOR1	22q12.2	6.66	7.35	0.97	1.03	-0.69	0.0002134	0.0165	Under-expressed
DEXI	16p13.13	8.8	9.23	0.55	0.73	-0.43	0.0002149	0.0165	Under-expressed
COX4I2	20q11.21	3.14	4.04	1.26	1.37	-0.9	0.0002151	0.0165	Under-expressed
CDH5	16q21	8.72	9.47	1.11	0.96	-0.75	0.0002179	0.0165	Under-expressed
CLEC1A	12p13.2	4.84	5.62	1.17	0.92	-0.77	0.0002181	0.0165	Under-expressed
AARD	8q24.11	10.31	8.62	2.17	2.94	1.69	0.0002195	0.0165	Over-expressed
TSC22D3	Xq22.3	10	10.78	1.08	1.19	-0.78	0.0002214	0.0165	Under-expressed
GEM	8q22.1	7.99	8.74	1	1.25	-0.75	0.0002227	0.0165	Under-expressed
KCNH2	7q36.1	6.65	5.06	2.19	2.47	1.59	0.0002235	0.0165	Over-expressed
SLC10A7	4q31.22	7.18	7.69	0.78	0.62	-0.51	0.0002273	0.0167	Under-expressed
ADCY9	16p13.3	8.34	8.88	0.76	0.81	-0.54	0.0002302	0.0169	Under-expressed
LIMA1	12q13.12	9.9	10.56	0.93	0.97	-0.66	0.0002324	0.0169	Under-expressed
IFITM2	11p15.5	9.88	10.63	1.05	1.14	-0.75	0.0002358	0.017	Under-expressed
REEP5	5q22.2	11.26	11.67	0.46	0.83	-0.41	0.0002373	0.017	Under-expressed
PALLD	4q32.3	11.41	12.04	0.94	0.84	-0.63	0.0002382	0.017	Under-expressed
TFPI	2q32.1	7.43	8.24	1.19	1.14	-0.81	0.0002384	0.017	Under-expressed
EZH2	7q36.1	9.93	9.38	0.72	0.91	0.54	0.00024	0.017	Over-expressed
GJA4	1p34.3	6.89	7.54	0.85	1.1	-0.65	0.0002416	0.0171	Under-expressed
MECOM	3q26.2	6.73	7.58	1.15	1.39	-0.85	0.000247	0.0174	Under-expressed
PEAR1	1q23.1	5.54	6.35	1.14	1.21	-0.8	0.0002489	0.0174	Under-expressed
GNPTG	16p13.3	9.35	9.83	0.66	0.76	-0.48	0.000253	0.0176	Under-expressed
NR2F1-AS1	5q15	4.82	5.7	1.29	1.26	-0.89	0.0002539	0.0176	Under-expressed
PRPF3	1q21.2	10.93	10.48	0.64	0.68	0.45	0.0002589	0.0178	Over-expressed
RNASEL	1q25.3	7.47	8.01	0.8	0.71	-0.53	0.0002642	0.0181	Under-expressed
ESYT3	3q22.3	6.56	5.59	1.31	1.65	0.98	0.0002667	0.0181	Over-expressed
ABLIM3	5q32	6.08	7.15	1.54	1.57	-1.06	0.0002675	0.0181	Under-expressed
ABHD14B	3p21.2	9.61	10.15	0.78	0.8	-0.54	0.000269	0.0182	Under-expressed
CTPS1	1p34.2	10.59	10.13	0.6	0.83	0.46	0.0002866	0.0192	Over-expressed
JMJD8	16p13.3	9.95	10.43	0.73	0.65	-0.48	0.0002871	0.0192	Under-expressed
SLC40A1	2q32.2	8.98	10.08	1.61	1.6	-1.1	0.0002887	0.0192	Under-expressed
MMRN2	10q23.2	8.16	8.85	0.95	1.12	-0.69	0.0002902	0.0192	Under-expressed
THBD	20p11.21	7.96	8.64	0.95	1.06	-0.67	0.0002923	0.0193	Under-expressed
SEPHS2	16p11.2	10.75	11.14	0.5	0.7	-0.39	0.0002961	0.0194	Under-expressed
RASGRF2	5q14.1	5.55	6.39	1.27	1.11	-0.84	0.0002968	0.0194	Under-expressed
ARHGAP17	16p12.1	9.97	10.29	0.51	0.37	-0.32	0.0003099	0.0201	Under-expressed
SNORA8	11q21	8.84	8.32	0.78	0.72	0.52	0.0003118	0.0201	Over-expressed
INPP4B	4q31.21	5.59	6.75	1.75	1.59	-1.16	0.0003118	0.0201	Under-expressed
CDCA2	8p21.2	9.05	8.37	0.83	1.33	0.69	0.0003183	0.0204	Over-expressed
RARA	17q21.2	9.37	9.8	0.52	0.86	-0.44	0.0003208	0.0204	Under-expressed
DBF4B	17q21.31|17q21	7.66	7.27	0.53	0.69	0.4	0.0003224	0.0205	Over-expressed
UMPS	3q21.2	9.95	9.64	0.41	0.52	0.3	0.0003306	0.0209	Over-expressed
ZFHX4	8q21.13	6.02	7.19	1.82	1.43	-1.16	0.0003349	0.0211	Under-expressed
KCNJ14	19q13.33	5.47	4.9	0.83	0.88	0.57	0.0003381	0.0212	Over-expressed
CARMN	5q32	5.64	6.65	1.35	1.78	-1.01	0.0003446	0.0215	Under-expressed
PRICKLE2	3p14.1	7.5	8.33	1.24	1.21	-0.83	0.0003521	0.0218	Under-expressed
E2F1	20q11.22	9.66	9.05	0.83	1.06	0.61	0.0003584	0.0221	Over-expressed
THNSL1	10p12.1	8.72	8.12	0.73	1.16	0.59	0.0003652	0.0224	Over-expressed
KDM1A	1p36.12	11.59	11.25	0.48	0.59	0.35	0.0003653	0.0224	Over-expressed
SH3RF2	5q32	5.16	6.47	2.02	1.73	-1.31	0.0003674	0.0224	Under-expressed
FGD1	Xp11.22	9.67	9	0.88	1.24	0.67	0.0003738	0.0227	Over-expressed
STEAP4	7q21.12	7.27	8.58	1.89	2.11	-1.31	0.0003768	0.0228	Under-expressed
LYSMD1	1q21.3	8.61	8.13	0.63	0.87	0.48	0.0003826	0.0229	Over-expressed
PDE2A	11q13.4	5.61	6.4	1.12	1.31	-0.79	0.0003829	0.0229	Under-expressed
EEF2KMT	16p13.3	8.43	8.91	0.77	0.59	-0.49	0.0003868	0.023	Under-expressed
ABHD6	3p14.3	6.35	6.94	0.79	1.08	-0.59	0.0003876	0.023	Under-expressed
AGA	4q34.3	8.37	8.86	0.71	0.78	-0.49	0.0003921	0.0231	Under-expressed
KHSRP	19p13.3	11.66	11.3	0.56	0.46	0.36	0.0003946	0.0231	Over-expressed
VWF	12p13.31	10.55	11.33	1.16	1.17	-0.77	0.0003949	0.0231	Under-expressed
NMRAL1	16p13.3	9.46	9.94	0.67	0.8	-0.47	0.0003963	0.0231	Under-expressed
KIF2C	1p34.1	10.38	9.79	0.73	1.16	0.59	0.000398	0.0231	Over-expressed
CDCA8	1p34.3	10.15	9.59	0.68	1.12	0.56	0.000399	0.0231	Over-expressed
SRRM2	16p13.3	13.01	13.33	0.46	0.51	-0.32	0.0004051	0.0233	Under-expressed
GPR4	19q13.32	6.9	7.44	0.8	0.84	-0.54	0.0004058	0.0233	Under-expressed
PIF1	15q22.31	6.93	6.19	1.03	1.29	0.74	0.0004121	0.0235	Over-expressed
ZC3H8	2q14.1	7.74	7.31	0.69	0.55	0.43	0.0004167	0.0237	Over-expressed
ZNF662	3p22.1	7.3	6.48	1.2	1.34	0.83	0.0004189	0.0237	Over-expressed
ACTL6A	3q26.33	11.05	10.68	0.45	0.73	0.37	0.0004218	0.0238	Over-expressed
SEMA5A	5p15.31	7.53	8.58	1.68	1.32	-1.05	0.0004282	0.0241	Under-expressed
FAHD1	16p13.3	8.78	9.22	0.7	0.62	-0.45	0.0004315	0.0241	Under-expressed
WDR62	19q13.12	8.71	8.13	0.85	0.94	0.58	0.0004328	0.0241	Over-expressed
EXOSC3	9p13.2	9.06	8.7	0.51	0.62	0.36	0.000436	0.0242	Over-expressed
KDM4D	11q21	5.56	5.08	0.75	0.65	0.48	0.0004383	0.0242	Over-expressed
MCM10	10p13	9.35	8.63	0.95	1.36	0.72	0.0004392	0.0242	Over-expressed
KDM8	16p12.1	5.73	6.09	0.45	0.71	-0.36	0.0004544	0.0249	Under-expressed
ZDHHC3	3p21.31	10.07	10.34	0.41	0.45	-0.28	0.0004715	0.0258	Under-expressed
CD93	20p11.21	9.95	10.62	1.03	0.96	-0.66	0.0004738	0.0258	Under-expressed
CLCN2	3q27.1	7.75	7.05	1.04	1.09	0.7	0.0004792	0.026	Over-expressed
IL3RA	Xp22.33 and Yp11.2	6.56	7.19	0.85	1.18	-0.63	0.0004907	0.0263	Under-expressed
NCAPG	4p15.31	9.89	9.4	0.56	1.06	0.49	0.0004911	0.0263	Over-expressed
PRR13	12q13.13	10.5	10.82	0.49	0.49	-0.32	0.0004916	0.0263	Under-expressed
VEGFC	4q34.3	6.57	7.21	0.89	1.17	-0.64	0.000494	0.0263	Under-expressed
ESPL1	12q13.13	9.13	8.59	0.68	1.08	0.54	0.0004948	0.0263	Over-expressed
MAP3K5	6q23.3	8.46	9.06	0.93	0.89	-0.6	0.0004976	0.0263	Under-expressed
TERF2IP	16q23.1	10.13	10.42	0.4	0.55	-0.3	0.0005	0.0263	Under-expressed
WNT5A	3p14.3	7.27	8.26	1.55	1.42	-0.99	0.0005003	0.0263	Under-expressed
TXNDC11	16p13.13	10	10.42	0.68	0.51	-0.42	0.000509	0.0265	Under-expressed
SEPHS1	10p13	11.28	10.86	0.62	0.69	0.42	0.000509	0.0265	Over-expressed
ZNF687	1q21.3	10.44	10.07	0.58	0.56	0.37	0.0005095	0.0265	Over-expressed
GPR146	7p22.3	5.7	6.21	0.71	0.89	-0.5	0.0005121	0.0265	Under-expressed
PBK	8p21.1	8.95	8.35	0.83	1.14	0.61	0.0005259	0.0271	Over-expressed
NDUFB10	16p13.3	9.96	10.49	0.81	0.76	-0.52	0.0005306	0.0273	Under-expressed
ACOX2	3p14.3	4.22	5.31	1.47	2.09	-1.1	0.0005336	0.0273	Under-expressed
USP7	16p13.2	11.43	11.72	0.46	0.43	-0.29	0.000539	0.0275	Under-expressed
PIMREG	17p13.2	8.4	7.76	0.84	1.28	0.64	0.0005434	0.0275	Over-expressed
ACVRL1	12q13.13	8.26	8.77	0.72	0.89	-0.5	0.0005435	0.0275	Under-expressed
ARHGAP24	4q21.23-q21.3	6.77	7.42	1.08	0.78	-0.65	0.0005524	0.0279	Under-expressed
NUP107	12q15	10.34	9.99	0.5	0.61	0.35	0.0005673	0.0284	Over-expressed
PDCD4-AS1	10q25.2	5.15	5.66	0.67	1.01	-0.51	0.0005673	0.0284	Under-expressed
BFAR	16p13.12	10.29	10.56	0.44	0.35	-0.27	0.0005697	0.0284	Under-expressed
C16ORF91	16p13.3	7.73	8.17	0.71	0.6	-0.44	0.0005742	0.0285	Under-expressed
LRRC32	11q13.5	8.49	9.22	1.16	1.06	-0.73	0.0005792	0.0286	Under-expressed
KIF23	15q23	10.03	9.5	0.71	1.02	0.53	0.0005805	0.0286	Over-expressed
CDC25A	3p21.31	8.62	8.06	0.72	1.11	0.56	0.000581	0.0286	Over-expressed
BTNL9	5q35.3	4.46	5.52	1.49	1.94	-1.06	0.0005864	0.0287	Under-expressed
RIPPLY3	21q22.13	5.37	4.2	1.76	1.93	1.17	0.0005952	0.029	Over-expressed
SEMA6D	15q21.1	4.97	5.98	1.66	1.27	-1.01	0.0005954	0.029	Under-expressed
GALNT10	5q33.2	8.94	9.62	1.09	1.01	-0.69	0.0005993	0.029	Under-expressed
DNAJC6	1p31.3	7.51	6.45	1.54	1.84	1.05	0.0006004	0.029	Over-expressed
ZNF37A	10p11.1	9.56	9.09	0.74	0.69	0.47	0.0006034	0.0291	Over-expressed
CORO7	16p13.3	8.88	9.34	0.72	0.73	-0.47	0.0006104	0.0292	Under-expressed
RNFT2	12q24.22	7.43	6.6	1.18	1.52	0.83	0.000611	0.0292	Over-expressed
FOXO1	13q14.11	8.4	9.03	1.02	0.84	-0.62	0.000612	0.0292	Under-expressed
SMIM14	4p14	8.56	9.15	0.88	1.01	-0.59	0.0006188	0.0294	Under-expressed
TAF1D	11q21	9.89	9.42	0.76	0.64	0.47	0.0006229	0.0295	Over-expressed
MAP6D1	3q27.1	6.69	6.06	0.88	1.19	0.63	0.0006258	0.0295	Over-expressed
ADCY4	14q12	5.98	6.72	1.11	1.24	-0.74	0.0006268	0.0295	Under-expressed
PAXIP1	7q36.2	9.2	8.85	0.55	0.58	0.36	0.0006399	0.03	Over-expressed
PGBD1	6p22.1	7.33	6.69	0.97	1.08	0.64	0.0006489	0.0303	Over-expressed
FHL5	6q16.1	2.59	3.67	1.72	1.55	-1.07	0.0006529	0.0303	Under-expressed
EPAS1	2p21	10.71	11.33	1	0.89	-0.62	0.0006533	0.0303	Under-expressed
AURKAP1	1q41	4.47	3.81	1.02	1.08	0.66	0.0006571	0.0303	Over-expressed
TP53TG1	7q21.12	7.03	7.72	0.94	1.35	-0.69	0.0006587	0.0303	Under-expressed
ASPM	1q31.3	10.44	9.77	0.91	1.32	0.67	0.0006617	0.0303	Over-expressed
ACP1	2p25.3	11.23	10.85	0.56	0.66	0.38	0.0006621	0.0303	Over-expressed
TOM1L2	17p11.2	9.31	9.76	0.69	0.72	-0.45	0.0006661	0.0304	Under-expressed
GALNT7	4q34.1	9.12	9.75	0.88	1.16	-0.62	0.0006689	0.0304	Under-expressed
EIF1AX	Xp22.12	11.13	10.79	0.54	0.51	0.34	0.0006728	0.0305	Over-expressed
KANK3	19p13.2	5.35	5.93	0.78	1.13	-0.58	0.0006771	0.0305	Under-expressed
JAM2	21q21.3	5.88	6.66	1.21	1.25	-0.78	0.0006774	0.0305	Under-expressed
ZNF232	17p13.2	8.26	7.75	0.79	0.84	0.51	0.0006924	0.031	Over-expressed
SMC4	3q25.33	11.72	11.26	0.65	0.87	0.46	0.0006947	0.031	Over-expressed
B3GNT5	3q27.1	9.92	9.29	0.85	1.22	0.62	0.0006954	0.031	Over-expressed
SRPX2	Xq22.1	7.24	8.04	1.28	1.23	-0.81	0.0006989	0.031	Under-expressed
TMEM87A	15q15.1	10.76	11.12	0.53	0.67	-0.37	0.000703	0.0311	Under-expressed
GRAP	17p11.2	6.23	6.85	0.91	1.12	-0.62	0.000705	0.0311	Under-expressed
NOLC1	10q24.32	11.95	11.59	0.55	0.59	0.36	0.0007084	0.0312	Over-expressed
FUT8	14q23.3	8.64	9.15	0.81	0.76	-0.51	0.0007252	0.0315	Under-expressed
HLTF	3q24	10.66	10.16	0.8	0.79	0.51	0.0007259	0.0315	Over-expressed
NOTCH4	6p21.32	7.95	8.42	0.64	0.93	-0.47	0.0007275	0.0315	Under-expressed
RRAS	19q13.33	8.81	9.4	0.92	0.96	-0.59	0.0007279	0.0315	Under-expressed
LOC652276	16p13.3	4.95	5.33	0.57	0.65	-0.38	0.0007303	0.0315	Under-expressed
RAMP3	7p13	7.11	7.84	1.12	1.2	-0.73	0.0007321	0.0315	Under-expressed
ORC1	1p32.3	8.24	7.65	0.79	1.21	0.59	0.0007331	0.0315	Over-expressed
HAUS6	9p22.1	9.69	9.21	0.74	0.79	0.48	0.0007342	0.0315	Over-expressed
SCUBE2	11p15.4	6.01	7.29	1.96	2.2	-1.29	0.0007369	0.0315	Under-expressed
RHOJ	14q23.2	6.16	6.93	1.24	1.13	-0.77	0.0007445	0.0317	Under-expressed
NHLRC4	16p13.3	3.25	4.06	1.2	1.45	-0.81	0.0007469	0.0317	Under-expressed
ING2	4q35.1	7.39	7.74	0.53	0.6	-0.35	0.0007523	0.0319	Under-expressed
C19ORF48	19q13.33	10.7	10.18	0.82	0.84	0.52	0.0007623	0.0322	Over-expressed
KIF15	3p21.31	8.84	8.28	0.76	1.14	0.56	0.0007694	0.0322	Over-expressed
CAVIN4	9q31.1	4.44	3.7	1.2	1.13	0.75	0.0007697	0.0322	Over-expressed
PIK3R1	5q13.1	10.48	11.15	1	1.21	-0.67	0.0007709	0.0322	Under-expressed
GDE1	16p12.3	10.52	10.88	0.54	0.63	-0.36	0.0007713	0.0322	Under-expressed
TPK1	7q35	5.21	5.87	1.03	1.09	-0.66	0.0007743	0.0322	Under-expressed
GKAP1	9q21.32	6.73	6.16	0.86	1	0.57	0.000778	0.0323	Over-expressed
POPDC2	3q13.33	5.07	5.63	0.7	1.19	-0.55	0.000796	0.0329	Under-expressed
MIDN	19p13.3	10.36	10.74	0.56	0.71	-0.38	0.0008005	0.0329	Under-expressed
ETFDH	4q32.1	8.04	8.38	0.55	0.49	-0.34	0.0008025	0.0329	Under-expressed
AOC3	17q21.31	7.88	8.71	1.33	1.34	-0.84	0.0008025	0.0329	Under-expressed
COMT	22q11.21	10.58	11.08	0.81	0.71	-0.49	0.000808	0.033	Under-expressed
LFNG	7p22.3	7.74	8.39	0.91	1.28	-0.65	0.0008156	0.0332	Under-expressed
TMEM8A	16p13.3	10.03	10.51	0.79	0.68	-0.48	0.0008197	0.0333	Under-expressed
GRAMD2B	5q23.2	8.94	9.41	0.71	0.81	-0.47	0.0008246	0.0334	Under-expressed
XPO1	2p15	12.42	12.15	0.38	0.52	0.27	0.0008302	0.0335	Over-expressed
GPR85	7q31.1	4.39	5.02	0.99	1.05	-0.63	0.0008343	0.0336	Under-expressed
ZNF764	16p11.2	7.26	7.57	0.49	0.5	-0.31	0.0008368	0.0336	Under-expressed
MGST2	4q31.1	8.43	8.97	0.81	0.94	-0.53	0.000843	0.0337	Under-expressed
DECR2	16p13.3	7.92	8.53	1.02	0.86	-0.61	0.000856	0.0341	Under-expressed
PLXDC1	17q12	7.75	8.46	1.18	1	-0.71	0.0008571	0.0341	Under-expressed
TONSL	8q24.3	9.39	8.85	0.8	0.98	0.54	0.0008609	0.0342	Over-expressed
MED17	11q21	9.72	9.39	0.56	0.48	0.34	0.0008645	0.0342	Over-expressed
RRN3P3	16p12.2	5.41	5.73	0.5	0.5	-0.31	0.0008809	0.0347	Under-expressed
TBX19	1q24.2	7.51	6.9	0.85	1.2	0.6	0.0008821	0.0347	Over-expressed
TRAPPC2L	16q24.3	8.65	9.03	0.55	0.73	-0.38	0.0008881	0.0348	Under-expressed
STIL	1p33	9.49	8.95	0.77	1.04	0.54	0.0008957	0.0349	Over-expressed
ZNF174	16p13.3	7.74	8.02	0.47	0.38	-0.28	0.0008971	0.0349	Under-expressed
UFSP2	4q35.1	8.52	8.8	0.44	0.46	-0.28	0.0008986	0.0349	Under-expressed
CBFA2T3	16q24.3	5.47	6.43	1.55	1.52	-0.96	0.0009	0.0349	Under-expressed
KRT222	17q21.2	4.6	5.02	0.63	0.75	-0.42	0.0009032	0.0349	Under-expressed
TWNK	10q24.31	9.08	8.67	0.64	0.73	0.41	0.0009291	0.0358	Over-expressed
GASK1B	4q32.1	9.35	10.17	1.39	1.11	-0.82	0.0009322	0.0359	Under-expressed
NPRL3	16p13.3	9.59	9.94	0.59	0.52	-0.36	0.0009353	0.0359	Under-expressed
DLL4	15q15.1	7.25	7.74	0.68	1	-0.49	0.0009382	0.0359	Under-expressed
TGFB3	14q24.3	8.59	9.22	0.99	1.11	-0.64	0.0009465	0.0361	Under-expressed
CAV1	7q31.2	9.59	10.34	1.18	1.3	-0.75	0.0009482	0.0361	Under-expressed
GRID1	10q23.1-q23.2	4.24	5.04	1.31	1.22	-0.8	0.0009556	0.0361	Under-expressed
CHORDC1	11q14.3	9.77	9.38	0.59	0.69	0.39	0.000956	0.0361	Over-expressed
EDA2R	Xq12	4.13	5.02	1.5	1.31	-0.9	0.0009577	0.0361	Under-expressed
SERHL2	22q13.2	4.98	6.29	1.58	2.96	-1.3	0.0009703	0.0365	Under-expressed
POLA2	11q13.1	9.32	8.98	0.53	0.61	0.34	0.000977	0.0367	Over-expressed
AKR1C2	10p15.1	5.41	7.15	2.69	3.05	-1.73	0.0009829	0.0368	Under-expressed
MRAP2	6q14.2	4.25	5.57	2.26	1.79	-1.32	0.0009887	0.0369	Under-expressed
HCFC1R1	16p13.3	9.2	9.78	0.96	0.91	-0.58	0.0009945	0.037	Under-expressed
DCTN5	16p12.2	10.38	10.71	0.56	0.47	-0.33	0.0009961	0.037	Under-expressed
EDNRB	13q22.3	6.22	7.22	1.69	1.42	-1	0.001001	0.037	Under-expressed
CELF4	18q12.2	5.65	4.4	2.03	2.02	1.25	0.001003	0.037	Over-expressed
DEPDC1	1p31.3	9.32	8.7	0.83	1.31	0.62	0.001004	0.037	Over-expressed
NFKBIZ	3q12.3	7.69	8.43	1.24	1.13	-0.75	0.001011	0.0371	Under-expressed
IGF1	12q23.2	6.31	7.56	2.12	1.8	-1.25	0.001019	0.0372	Under-expressed
CAD	2p23.3	11.19	10.81	0.58	0.67	0.37	0.001021	0.0372	Over-expressed
BTBD11	12q23.3	5.06	6.12	1.69	1.78	-1.06	0.001021	0.0372	Under-expressed
FHOD1	16q22.1	8.67	9.11	0.56	0.97	-0.44	0.001027	0.0372	Under-expressed
WLS	1p31.3	8.27	9.31	1.67	1.69	-1.03	0.001027	0.0372	Under-expressed
SNRPN	15q11.2	9.07	9.91	1.41	1.27	-0.84	0.001032	0.0373	Under-expressed
BMERB1	16p13.11	6.2	6.88	1.01	1.31	-0.68	0.001037	0.0374	Under-expressed
CCDC152	5p12	4.44	5.21	1.2	1.39	-0.77	0.001041	0.0374	Under-expressed
SHISA5	3p21.31	11.34	11.74	0.64	0.68	-0.4	0.001042	0.0374	Under-expressed
HEYL	1p34.2	7.47	8.08	0.93	1.11	-0.61	0.001058	0.0378	Under-expressed
LSG1	3q29	10.47	10.15	0.53	0.5	0.32	0.001059	0.0378	Over-expressed
DSCC1	8q24.12	8.72	8.21	0.71	1.04	0.5	0.001064	0.0378	Over-expressed
ALCAM	3q13.11	9.78	10.77	1.56	1.75	-1	0.001067	0.0378	Under-expressed
IQCK	16p12.3	8.08	8.55	0.76	0.78	-0.47	0.001071	0.0378	Under-expressed
CIAO3	16p13.3	8.75	9.23	0.81	0.7	-0.48	0.001071	0.0378	Under-expressed
CLK2P1	7p15.3	4.33	3.88	0.69	0.86	0.45	0.001077	0.0379	Over-expressed
TMEM144	4q32.1	7.24	7.73	0.78	0.88	-0.5	0.001078	0.0379	Under-expressed
SYNC	1p35.1	6.55	7.62	1.69	1.86	-1.07	0.001082	0.0379	Under-expressed
ZC3H7A	16p13.13	9.6	9.92	0.51	0.54	-0.32	0.001086	0.0379	Under-expressed
CHEK2	22q12.1	8.79	8.4	0.59	0.7	0.39	0.001088	0.0379	Over-expressed
ARHGDIB	12p12.3	11.49	12.11	1.01	1.02	-0.62	0.001104	0.0383	Under-expressed
FAM214A	15q21.2-q21.3	8.49	9.02	0.79	1.02	-0.53	0.001106	0.0383	Under-expressed
ACBD7	10p13	7.49	6.54	1.44	1.83	0.96	0.001121	0.0388	Over-expressed
DAZAP2	12q13.13	11.94	12.19	0.39	0.44	-0.25	0.001129	0.0389	Under-expressed
PTPRM	18p11.23	8.54	9.31	1.3	1.11	-0.76	0.001129	0.0389	Under-expressed
GJA1	6q22.31	10	10.76	1.25	1.21	-0.75	0.00114	0.0391	Under-expressed
CEP85	1p36.11	9.31	8.9	0.65	0.76	0.41	0.001143	0.0392	Over-expressed
CSE1L	20q13.13	12.08	11.76	0.48	0.61	0.32	0.001153	0.0393	Over-expressed
FAS	10q23.31	7.87	8.56	1.22	0.85	-0.69	0.001154	0.0393	Under-expressed
MARCKS	6q21	11.93	12.31	0.63	0.61	-0.38	0.001176	0.0397	Under-expressed
DNAH14	1q42.12	7.75	7.27	0.75	0.89	0.48	0.001178	0.0397	Over-expressed
ISY1	3q21.3	9.87	9.6	0.44	0.45	0.27	0.001181	0.0397	Over-expressed
UPF2	10p14	10.77	10.39	0.59	0.71	0.38	0.001187	0.0397	Over-expressed
MGC16142	7q21.2	3.78	3.35	0.69	0.75	0.43	0.001188	0.0397	Over-expressed
FXR1	3q26.33	11.64	11.34	0.47	0.54	0.3	0.001188	0.0397	Over-expressed
DHRS7	14q23.1	9.88	10.3	0.66	0.8	-0.43	0.001193	0.0397	Under-expressed
FAM110D	1p36.11	3.99	4.64	0.93	1.35	-0.65	0.001196	0.0397	Under-expressed
MYH11	16p13.11	7.37	8.64	2.02	2.31	-1.28	0.001196	0.0397	Under-expressed
CHEK1	11q24.2	8.99	8.51	0.72	0.95	0.48	0.001198	0.0397	Over-expressed
SOX18	20q13.33	6.52	7.24	1.15	1.23	-0.71	0.001198	0.0397	Under-expressed
CIB2	15q25.1	7.72	7.09	0.92	1.3	0.64	0.0012	0.0397	Over-expressed
SYNPO2	4q26	7.71	8.6	1.43	1.57	-0.89	0.001209	0.0399	Under-expressed
WDR24	16p13.3	7.89	8.24	0.55	0.63	-0.35	0.001218	0.0399	Under-expressed
RHOB	2p24.1	11.1	11.63	0.78	1.1	-0.54	0.001218	0.0399	Under-expressed
HTATSF1	Xq26.3	11.53	11.18	0.59	0.56	0.35	0.001219	0.0399	Over-expressed
COL14A1	8q24.12	8.37	9.53	1.93	1.87	-1.16	0.00122	0.0399	Under-expressed
IQGAP2	5q13.3	7.94	8.82	1.46	1.43	-0.88	0.001227	0.04	Under-expressed
GNAZ	22q11.22-q11.23	8.05	7.34	1.08	1.33	0.7	0.00124	0.0404	Over-expressed
ITGA5	12q13.13	10.68	11.18	0.77	0.94	-0.5	0.001243	0.0404	Under-expressed
SPC25	2q24.3	7.9	7.39	0.76	0.98	0.5	0.001247	0.0404	Over-expressed
XBP1	22q12.1|22q12	12.12	12.77	0.99	1.22	-0.65	0.001261	0.0408	Under-expressed
DHRS7B	17p11.2	8.41	8.8	0.61	0.74	-0.39	0.001275	0.0411	Under-expressed
MPG	16p13.3	9.01	9.54	0.88	0.87	-0.53	0.001283	0.0413	Under-expressed
NARS2	11q14.1	9	8.61	0.64	0.64	0.39	0.001291	0.0414	Over-expressed
PRKCH	14q23.1	8.83	9.34	0.85	0.85	-0.51	0.001298	0.0416	Under-expressed
MCOLN3	1p22.3	6.51	5.49	1.65	1.82	1.03	0.001304	0.0417	Over-expressed
GEMIN8P4	1p22.2	5.58	5.1	0.77	0.86	0.48	0.001309	0.0417	Over-expressed
RRP1B	21q22.3	10.92	10.61	0.45	0.65	0.31	0.00132	0.042	Over-expressed
CLU	8p21.1	12.04	13.32	2.16	2.04	-1.28	0.001332	0.0423	Under-expressed
KIF24	9p13.3	7.88	7.43	0.73	0.79	0.45	0.001338	0.0423	Over-expressed
BAIAP3	16p13.3	4.42	5.38	1.48	1.82	-0.96	0.00134	0.0423	Under-expressed
PHKB	16q12.1	10.14	10.55	0.64	0.77	-0.41	0.001344	0.0423	Under-expressed
EIF2S3	Xp22.11	12.83	12.46	0.68	0.46	0.38	0.001355	0.0426	Over-expressed
MAN2B2	4p16.1	9.62	10.04	0.71	0.68	-0.42	0.001358	0.0426	Under-expressed
MRE11	11q21	9.29	8.88	0.71	0.63	0.41	0.001361	0.0426	Over-expressed
PTGER3	1p31.1	5.75	6.82	1.8	1.72	-1.07	0.001376	0.0429	Under-expressed
NME4	16p13.3	10.39	10.95	0.93	0.97	-0.56	0.001381	0.0429	Under-expressed
USHBP1	19p13.11	3.77	4.4	0.87	1.39	-0.63	0.001383	0.0429	Under-expressed
GSPT1	16p13.13	11.57	11.89	0.52	0.51	-0.31	0.001383	0.0429	Under-expressed
C1ORF112	1q24.2	8.98	8.53	0.7	0.86	0.45	0.001389	0.043	Over-expressed
DNAJC9	10q22.2	10.4	10.03	0.62	0.59	0.36	0.001393	0.043	Over-expressed
GPIHBP1	8q24.3	3.1	4.12	1.41	2.25	-1.02	0.001424	0.0439	Under-expressed
GFER	16p13.3	8.35	8.8	0.78	0.72	-0.46	0.001428	0.0439	Under-expressed
FOXF1	16q24.1	2.8	3.65	1.37	1.55	-0.85	0.001432	0.0439	Under-expressed
CLEC2B	12p13.31	7.15	7.74	1	0.93	-0.59	0.001445	0.0442	Under-expressed
ACTA2	10q23.31	11.78	12.6	1.41	1.28	-0.82	0.00145	0.0442	Under-expressed
PRDM16	1p36.32	2.69	3.78	1.83	1.79	-1.08	0.001451	0.0442	Under-expressed
SH3TC1	4p16.1	7.37	7.95	0.96	1.02	-0.58	0.00147	0.0447	Under-expressed
SRP14	15q15.1	11.48	11.78	0.48	0.51	-0.29	0.001498	0.0454	Under-expressed
EDRF1	10q26.2	8.9	8.52	0.64	0.64	0.38	0.0015	0.0454	Over-expressed
FAM72B	1p11.2	8.34	7.79	0.77	1.2	0.55	0.001521	0.0459	Over-expressed
PARP1	1q42.12	12.79	12.47	0.53	0.57	0.32	0.001547	0.0466	Over-expressed
VIPR1	3p22.1	6.08	6.9	1.23	1.72	-0.83	0.001563	0.047	Under-expressed
PDGFD	11q22.3	7.11	7.75	1.06	1.14	-0.64	0.001569	0.0471	Under-expressed
CASP10	2q33.1	7.15	7.87	1.22	1.22	-0.72	0.001572	0.0471	Under-expressed
CCND2	12p13.32	8.63	9.37	1.23	1.29	-0.74	0.001579	0.0471	Under-expressed
KIF11	10q23.33	10.42	9.96	0.68	0.97	0.46	0.001582	0.0471	Over-expressed
GPCPD1	20p12.3	9.04	9.52	0.76	0.91	-0.48	0.001585	0.0471	Under-expressed
SCP2	1p32.3	11.01	11.31	0.42	0.67	-0.3	0.001591	0.0472	Under-expressed
CCDC170	6q25.1	4.39	5.16	1.24	1.44	-0.77	0.001601	0.0474	Under-expressed
CWF19L1	10q24.31	9.17	8.88	0.49	0.48	0.29	0.001607	0.0475	Over-expressed
SPRY1	4q28.1	8.3	8.92	1.03	1.15	-0.63	0.001626	0.0478	Under-expressed
BMS1	10q11.21	10.94	10.66	0.47	0.53	0.29	0.00163	0.0478	Over-expressed
SGK1	6q23.2	9.77	10.38	1.1	0.81	-0.61	0.00163	0.0478	Under-expressed
NR2C1	12q22	8.25	7.96	0.45	0.55	0.28	0.001631	0.0478	Over-expressed
ATP6V0E1	5q35.1	11.26	11.66	0.65	0.72	-0.4	0.001638	0.0479	Under-expressed
HOXD9	2q31.1	5.4	6.03	1.02	1.18	-0.63	0.00164	0.0479	Under-expressed
MKI67	10q26.2	12.04	11.48	0.82	1.19	0.56	0.00165	0.048	Over-expressed
CHAC2	2p16.2	6.61	6.13	0.75	0.94	0.48	0.001663	0.0483	Over-expressed
EMC7	15q14	9.57	9.87	0.5	0.56	-0.3	0.001673	0.0485	Under-expressed
PIPSL	10q23.33	8.02	7.69	0.55	0.57	0.33	0.001682	0.0487	Over-expressed
NUP210	3p25.1	11.71	11.01	1.18	1.25	0.71	0.001686	0.0487	Over-expressed
PARP8	5q11.1	7	7.8	1.43	1.21	-0.8	0.001701	0.0489	Under-expressed
SLC29A2	11q13.2	8.78	8.16	1.02	1.12	0.62	0.001703	0.0489	Over-expressed
CDH6	5p13.3	4.63	5.46	1.52	1.09	-0.83	0.00171	0.0491	Under-expressed
TICRR	15q26.1	8.73	8.2	0.79	1.12	0.53	0.001717	0.0491	Over-expressed
TROAP	12q13.12	9.01	8.5	0.72	1.14	0.51	0.001719	0.0491	Over-expressed
SENP3	17p13.1	10.2	9.91	0.44	0.57	0.29	0.001738	0.0495	Over-expressed
DEK	6p22.3	12.5	11.98	0.83	1.01	0.52	0.00174	0.0495	Over-expressed
ZFP82	19q13.12	7.55	7.07	0.75	0.95	0.48	0.001758	0.0497	Over-expressed
EEF2K	16p12.2	9.8	10.11	0.51	0.58	-0.31	0.001759	0.0497	Under-expressed
CD63	12q13.2	12.88	13.21	0.51	0.7	-0.33	0.001763	0.0497	Under-expressed
SEMA3A	7q21.11	4.22	5.31	1.92	1.72	-1.09	0.001764	0.0497	Under-expressed
GRASP	12q13.13	5.74	6.35	0.94	1.23	-0.61	0.001766	0.0497	Under-expressed
KIFC1	6p21.32	10.49	10.02	0.68	1.05	0.47	0.001774	0.0499	Over-expressed
SGO1	3p24.3	7.55	6.98	0.83	1.26	0.57	0.001787	0.05	Over-expressed
RFC5	12q24.23	8.99	8.64	0.59	0.62	0.35	0.001789	0.05	Over-expressed
LMNB2	19p13.3	11.39	10.97	0.68	0.81	0.42	0.00179	0.05	Over-expressed
DLGAP5	14q22.3	9.47	8.98	0.64	1.16	0.49	0.0018	0.0502	Over-expressed
ARFIP1	4q31.3	9.38	9.7	0.53	0.57	-0.32	0.001803	0.0502	Under-expressed
DDX11	12p11.21	9.68	9.19	0.77	0.96	0.49	0.001815	0.0504	Over-expressed
IQCC	1p35.2	6.91	6.45	0.82	0.74	0.47	0.001821	0.0505	Over-expressed
RAI2	Xp22.13	6.09	6.89	1.37	1.39	-0.8	0.00183	0.0506	Under-expressed
FAM76B	11q21	8.55	8.18	0.63	0.63	0.37	0.001845	0.0509	Over-expressed
FANCD2	3p25.3	9.32	8.91	0.66	0.8	0.41	0.001851	0.0509	Over-expressed
ZNF239	10q11.21	8	7.51	0.76	0.99	0.49	0.001853	0.0509	Over-expressed
SNHG3	1p35.3	6.69	6.09	0.98	1.15	0.6	0.001867	0.0512	Over-expressed
TESC	12q24.22	3.39	4.51	1.93	1.93	-1.12	0.001885	0.0516	Under-expressed
IQGAP3	1q22	10.49	9.93	0.76	1.33	0.56	0.001902	0.052	Over-expressed
ZWINT	10q21.1	10.13	9.65	0.78	0.96	0.49	0.001919	0.0522	Over-expressed
ACTB	7p22.1	16.65	16.97	0.55	0.56	-0.32	0.001919	0.0522	Under-expressed
NRIP2	12p13.33	5.09	5.65	0.9	1.13	-0.56	0.001921	0.0522	Under-expressed
FAM72A	1q32.1	6.22	5.59	0.91	1.41	0.63	0.001928	0.0523	Over-expressed
RASL10A	22q12.2	2.47	3.32	1.44	1.51	-0.85	0.001949	0.0527	Under-expressed
FAM47E	4q21.1	3.56	4.37	1.24	1.68	-0.81	0.001959	0.0529	Under-expressed
MAP1LC3B	16q24.2	10.58	10.88	0.5	0.52	-0.29	0.001963	0.0529	Under-expressed
F2R	5q13.3	9.26	9.95	1.26	0.97	-0.68	0.001966	0.0529	Under-expressed
ELOB	16p13.3	10.59	11.1	0.88	0.92	-0.51	0.001973	0.053	Under-expressed
C4ORF33	4q28.2	7.16	7.59	0.76	0.74	-0.43	0.00199	0.0533	Under-expressed
DBF4	7q21.12	9.04	8.72	0.48	0.71	0.32	0.001998	0.0534	Over-expressed
CYBRD1	2q31.1	10.39	10.99	0.99	1.16	-0.6	0.002002	0.0534	Under-expressed
CENPO	2p23.3	8.13	7.77	0.54	0.77	0.36	0.002009	0.0535	Over-expressed
MTPAP	10p11.23	9.84	9.47	0.62	0.66	0.37	0.002022	0.0538	Over-expressed
PTH1R	3p21.31	2.82	3.8	1.64	1.82	-0.98	0.002036	0.054	Under-expressed
C1ORF109	1p34.3	8.86	8.56	0.49	0.6	0.3	0.002048	0.0542	Over-expressed
SAMD1	19p13.12	8.84	8.46	0.68	0.58	0.38	0.002059	0.0543	Over-expressed
LRPPRC	2p21	12.46	12.1	0.6	0.66	0.36	0.00206	0.0543	Over-expressed
ZNF37BP	10q11.21	8.51	8.03	0.83	0.88	0.49	0.002071	0.0545	Over-expressed
STARD8	Xq13.1	6.63	7.19	1.01	0.91	-0.56	0.002082	0.0547	Under-expressed
FSTL3	19p13.3	7.53	8.2	1.05	1.38	-0.67	0.002087	0.0547	Under-expressed
CXCR4	2q22.1	10.68	11.29	1.04	1.1	-0.61	0.002098	0.0548	Under-expressed
SYT17	16p12.3	4.33	5.43	1.98	1.73	-1.1	0.002099	0.0548	Under-expressed
EED	11q14.2	9.08	8.83	0.42	0.45	0.25	0.00211	0.0548	Over-expressed
ABCA6	17q24.2-q24.3	4.47	5.59	2.06	1.63	-1.12	0.00211	0.0548	Under-expressed
FAM241A	4q25	7.35	8.02	1.15	1.19	-0.67	0.002112	0.0548	Under-expressed
SEC61A2	10p14	7.91	7.4	0.93	0.81	0.51	0.002114	0.0548	Over-expressed
MCTP1	5q15	5.66	6.54	1.54	1.46	-0.87	0.00213	0.0551	Under-expressed
AFF3	2q11.2	5.81	7.09	2.21	2.25	-1.27	0.002145	0.0554	Under-expressed
SLC46A3	13q12.3	7.79	8.35	0.92	1.08	-0.55	0.002176	0.0558	Under-expressed
CDC25C	5q31.2	7.44	6.91	0.78	1.17	0.52	0.00218	0.0558	Over-expressed
USP13	3q26.33	9.99	9.53	0.75	0.91	0.46	0.00218	0.0558	Over-expressed
AS3MT	10q24.32	7.93	7.13	1.33	1.56	0.8	0.002181	0.0558	Over-expressed
ZFP36	19q13.2	10.41	11.03	1.03	1.19	-0.62	0.002187	0.0558	Under-expressed
SLIT3	5q34-q35.1	7.72	8.65	1.71	1.38	-0.93	0.002188	0.0558	Under-expressed
INKA1	3p21.31	4.2	4.76	0.78	1.31	-0.56	0.002189	0.0558	Under-expressed
DUSP6	12q21.33	9.29	10.04	1.23	1.49	-0.75	0.002208	0.0562	Under-expressed
IL4R	16p12.1	9.52	10.04	0.86	0.98	-0.51	0.00223	0.0566	Under-expressed
C21ORF58	21q22.3	7.66	7.08	1	1.07	0.58	0.002231	0.0566	Over-expressed
MCM8	20p12.3	8.68	8.26	0.68	0.85	0.42	0.002237	0.0566	Over-expressed
CHCHD3	7q32.3-q33	10.31	10.02	0.49	0.56	0.29	0.002243	0.0566	Over-expressed
PCDH12	5q31.3	7.63	8.15	0.93	0.89	-0.52	0.002244	0.0566	Under-expressed
ANTXR2	4q21.21	8.84	9.4	1.02	0.92	-0.56	0.002248	0.0566	Under-expressed
ATAD2	8q24.13	11.45	10.92	0.86	1.03	0.52	0.002254	0.0566	Over-expressed
KIF20A	5q31.2	10.23	9.74	0.65	1.21	0.49	0.002274	0.057	Over-expressed
DNMT3A	2p23.3	10.07	9.69	0.64	0.7	0.37	0.002283	0.0571	Over-expressed
RAPGEF4	2q31.1	6.02	6.64	1.1	1.07	-0.62	0.002286	0.0571	Under-expressed
RAD51AP1	12p13.32	8.98	8.41	0.93	1.12	0.57	0.002287	0.0571	Over-expressed
MOB3A	19p13.3	9.77	10.09	0.53	0.65	-0.32	0.00231	0.0575	Under-expressed
NAGPA	16p13.3	7.55	7.99	0.82	0.64	-0.44	0.002317	0.0576	Under-expressed
PDXDC1	16p13.11	11.71	12.06	0.64	0.6	-0.36	0.00232	0.0576	Under-expressed
KIAA0825	5q15	4.25	4.81	1	0.97	-0.56	0.002344	0.0578	Under-expressed
TTK	6q14.1	9.57	9.03	0.74	1.27	0.53	0.002344	0.0578	Over-expressed
FAT4	4q28.1	6.23	7.24	1.9	1.44	-1.01	0.002346	0.0578	Under-expressed
FOXM1	12p13.33	11.4	10.77	1.02	1.32	0.63	0.002353	0.0578	Over-expressed
IGFBP7	4q12	11.63	12.16	0.92	0.92	-0.52	0.002355	0.0578	Under-expressed
MELTF	3q29	9.77	8.7	1.77	2.16	1.08	0.002356	0.0578	Over-expressed
NAA80	3p21.31	6.62	7.08	0.81	0.78	-0.46	0.002365	0.0579	Under-expressed
MCCC2	5q13.2	10.27	10.64	0.53	0.86	-0.37	0.002384	0.0583	Under-expressed
SNX4	3q21.2	9.96	9.7	0.47	0.42	0.26	0.002387	0.0583	Over-expressed
GIT2	12q24.11	9.71	9.99	0.53	0.41	-0.28	0.00239	0.0583	Under-expressed
DKK3	11p15.3	8.7	9.36	1.16	1.19	-0.66	0.002397	0.0583	Under-expressed
PDE1B	12q13.2	6.07	6.68	1.1	1.04	-0.61	0.002401	0.0583	Under-expressed
ZNF423	16q12.1	5.56	6.43	1.62	1.29	-0.87	0.002432	0.059	Under-expressed
NNT	5p12	10.37	9.84	0.87	1.04	0.52	0.002436	0.059	Over-expressed
POLD1	19q13.33	9.71	9.3	0.7	0.78	0.41	0.002444	0.059	Over-expressed
EXOC3L2	19q13.32	5.36	5.87	0.85	1.02	-0.51	0.002445	0.059	Under-expressed
VAMP5	2p11.2	7.97	8.48	0.9	0.96	-0.52	0.002457	0.0591	Under-expressed
SELENOI	2p23.3	10.84	10.48	0.62	0.67	0.36	0.002474	0.0595	Over-expressed
HIC1	17p13.3	6.28	6.86	0.96	1.2	-0.59	0.002482	0.0595	Under-expressed
KIF4A	Xq13.1	10.05	9.56	0.73	1.13	0.49	0.002485	0.0595	Over-expressed
ARL4A	7p21.3	8.13	8.68	0.94	1.05	-0.55	0.002502	0.0598	Under-expressed
RAVER2	1p31.3	9.31	8.82	0.7	1.17	0.49	0.002509	0.0599	Over-expressed
GPRC5C	17q25.1	7.03	8.03	1.68	1.93	-0.99	0.002519	0.0599	Under-expressed
TVP23A	16p13.13	3.49	4.11	0.99	1.34	-0.62	0.002524	0.0599	Under-expressed
ARHGEF39	9p13.3	8.02	7.6	0.63	0.94	0.42	0.002525	0.0599	Over-expressed
CALCRL	2q32.1	7.96	8.69	1.32	1.21	-0.72	0.002535	0.06	Under-expressed
RNASE4	14q11.2	8.44	9.04	1.07	1.08	-0.6	0.002538	0.06	Under-expressed
PSMD2	3q27.1	12.74	12.44	0.51	0.6	0.3	0.002552	0.0603	Over-expressed
ANKLE1	19p13.11	5.36	4.45	1.66	1.53	0.91	0.002562	0.0604	Over-expressed
GEN1	2p24.2	9.23	8.87	0.64	0.66	0.36	0.002567	0.0604	Over-expressed
ZNF703	8p11.23	6.36	7.16	1.47	1.27	-0.8	0.002571	0.0604	Under-expressed
LRRC17	7q22.1	4.96	5.87	1.53	1.83	-0.92	0.002574	0.0604	Under-expressed
MAF	16q23.2	8.77	9.35	1.07	0.97	-0.58	0.002578	0.0604	Under-expressed
CCNE1	19q12	8.88	8.17	1.17	1.49	0.72	0.002584	0.0604	Over-expressed
PDCD11	10q24.33	10.73	10.39	0.6	0.62	0.34	0.002594	0.0605	Over-expressed
MAD2L1	4q27	9.57	9.09	0.8	0.99	0.48	0.002604	0.0606	Over-expressed
ISCU	12q23.3	9.82	10.07	0.42	0.5	-0.25	0.002607	0.0606	Under-expressed
VSTM4	10q11.23	7.01	7.82	1.55	1.14	-0.81	0.002608	0.0606	Under-expressed
ADGRF5	6p12.3	8.56	9.14	1.07	0.97	-0.59	0.002624	0.0608	Under-expressed
TADA2B	4p16.1	9.17	9.45	0.47	0.57	-0.28	0.002627	0.0608	Under-expressed
RSPO3	6q22.33	5.28	6.19	1.61	1.63	-0.91	0.002633	0.0608	Under-expressed
TMEM159	16p12.3	9.56	9.97	0.73	0.76	-0.41	0.002649	0.0609	Under-expressed
EMP2	16p13.13	11.2	11.72	0.93	0.95	-0.52	0.00265	0.0609	Under-expressed
NCAPG2	7q36.3	10.17	9.71	0.77	0.88	0.45	0.002651	0.0609	Over-expressed
PDPK1	16p13.3	9.88	10.21	0.53	0.66	-0.32	0.002666	0.061	Under-expressed
CDC20	1p34.2	10.97	10.47	0.69	1.24	0.5	0.002666	0.061	Over-expressed
TGFBR2	3p24.1	10.14	10.76	1.13	1.11	-0.63	0.002668	0.061	Under-expressed
TCEA3	1p36.12	9.55	8.87	1.06	1.52	0.68	0.002672	0.061	Over-expressed
CEP295	11q21	9.15	8.76	0.69	0.68	0.39	0.002689	0.0613	Over-expressed
ZNF652	17q21.32-q21.33	10.05	10.4	0.54	0.76	-0.34	0.002697	0.0614	Under-expressed
ILKAP	2q37.3	9.02	8.75	0.5	0.47	0.27	0.002719	0.0618	Over-expressed
SERHL	22q13.2	6.81	7.48	0.8	1.78	-0.67	0.002736	0.062	Under-expressed
TMBIM4	12q14.3	9.55	9.91	0.53	0.83	-0.36	0.002739	0.062	Under-expressed
SHE	1q21.3	6.14	6.89	1.39	1.23	-0.75	0.00275	0.0622	Under-expressed
CD2BP2	16p11.2	10.2	10.48	0.45	0.58	-0.28	0.002771	0.0626	Under-expressed
ZNF419	19q13.43	7.61	7.23	0.64	0.79	0.39	0.002787	0.0628	Over-expressed
FLYWCH2	16p13.3	8.13	8.63	0.92	0.85	-0.5	0.002796	0.0629	Under-expressed
FLT4	5q35.3	7.21	7.77	0.99	1.04	-0.56	0.002803	0.063	Under-expressed
RUVBL1	3q21.3	10.73	10.39	0.59	0.68	0.34	0.002818	0.0631	Over-expressed
SMG5	1q22	12.1	11.77	0.54	0.7	0.33	0.002819	0.0631	Over-expressed
RAMP2	17q21.2	7.55	8.09	0.89	1.12	-0.54	0.002833	0.0632	Under-expressed
DTWD1	15q21.2	7.94	8.24	0.54	0.53	-0.3	0.002834	0.0632	Under-expressed
SNAI2	8q11.21	7.97	8.79	1.56	1.25	-0.82	0.002836	0.0632	Under-expressed
DPH6	15q14	6.27	6.65	0.71	0.61	-0.38	0.00284	0.0632	Under-expressed
NAA50	3q13.31	12.15	11.87	0.48	0.57	0.28	0.002873	0.0638	Over-expressed
RNASEH1	2p25.3	8.92	8.61	0.55	0.6	0.31	0.002881	0.0639	Over-expressed
AASS	7q31.32	6.62	7.24	1.16	1.03	-0.63	0.002907	0.0644	Under-expressed
DNAJB5	9p13.3	7.03	7.49	0.81	0.87	-0.46	0.002917	0.0644	Under-expressed
MYOM3	1p36.11	2.81	3.66	1.53	1.5	-0.85	0.002922	0.0644	Under-expressed
STK10	5q35.1	9.28	9.73	0.82	0.82	-0.45	0.002927	0.0644	Under-expressed
OLFML1	11p15.4	6.57	7.37	1.57	1.05	-0.8	0.002929	0.0644	Under-expressed
NEK2	1q32.3	9.66	9.17	0.65	1.24	0.49	0.002932	0.0644	Over-expressed
ZNF367	9q22.32|9q22.32	8.34	7.8	0.96	1.01	0.54	0.002941	0.0644	Over-expressed
ZNF674	Xp11.3	6.25	5.96	0.51	0.54	0.29	0.002941	0.0644	Over-expressed
SPC24	19p13.2	5.43	4.76	1.19	1.26	0.67	0.002946	0.0644	Over-expressed
CAV2	7q31.2	8.86	9.54	1.23	1.23	-0.68	0.002966	0.0647	Under-expressed
HDAC6	Xp11.23	10.18	9.88	0.51	0.59	0.3	0.002978	0.0649	Over-expressed
TSHZ3	19q12	6.92	7.59	1.27	1.03	-0.67	0.003014	0.0656	Under-expressed
LDHD	16q23.1	4.03	5.15	1.97	2.14	-1.12	0.003023	0.0656	Under-expressed
USP48	1p36.12	10.49	10.23	0.48	0.47	0.26	0.003026	0.0656	Over-expressed
TMEM167A	5q14.2	10.68	10.93	0.43	0.5	-0.25	0.00306	0.0663	Under-expressed
PMEPA1	20q13.31	11.03	11.55	0.96	0.92	-0.52	0.00309	0.0667	Under-expressed
TPX2	20q11.21	11.71	11.26	0.66	1.13	0.46	0.003093	0.0667	Over-expressed
YPEL2	17q22	8.35	8.81	0.82	0.85	-0.46	0.003093	0.0667	Under-expressed
TMEM255B	13q34	4.7	5.33	1.17	1.1	-0.63	0.003111	0.0669	Under-expressed
SCARF1	17p13.3	6.85	7.25	0.69	0.82	-0.4	0.003113	0.0669	Under-expressed
METTL7A	12q13.12	9.62	10.29	1.23	1.21	-0.68	0.003127	0.0669	Under-expressed
HELLS	10q23.33	8.08	7.58	0.9	0.93	0.5	0.00313	0.0669	Over-expressed
ZNF212	7q36.1	8.71	8.42	0.46	0.62	0.28	0.003133	0.0669	Over-expressed
HNRNPR	1p36.12	11.86	11.63	0.41	0.41	0.22	0.003136	0.0669	Over-expressed
TBX2	17q23.2	6.54	7.14	1	1.28	-0.6	0.003144	0.0669	Under-expressed
IL7	8q21.13	3.87	4.73	1.65	1.29	-0.86	0.003147	0.0669	Under-expressed
FOXS1	20q11.21	4.7	5.29	1.04	1.16	-0.59	0.003149	0.0669	Under-expressed
KRBOX4	Xp11.3	7.95	7.62	0.54	0.68	0.32	0.003153	0.0669	Over-expressed
SENP5	3q29	10.11	9.79	0.61	0.54	0.32	0.003167	0.0671	Over-expressed
RRN3	16p13.11	10.22	10.48	0.44	0.53	-0.26	0.003189	0.0674	Under-expressed
EEF1AKMT2	10q26.13	8.45	8.1	0.64	0.59	0.34	0.003194	0.0674	Over-expressed
ATG9B	7q36.1	6.09	5.28	1.48	1.47	0.81	0.003195	0.0674	Over-expressed
PLAT	8p11.21	8.95	9.7	1.3	1.53	-0.75	0.003213	0.0675	Under-expressed
TNRC6A	16p12.1	9.74	10.04	0.58	0.49	-0.3	0.003219	0.0675	Under-expressed
TRIP13	5p15.33	9.65	9.15	0.79	1.14	0.5	0.003222	0.0675	Over-expressed
PABPC1L	20q13.12	7.86	7.26	1.03	1.26	0.6	0.003226	0.0675	Over-expressed
ZNF112	19q13.31	7.1	6.67	0.73	0.9	0.43	0.00323	0.0675	Over-expressed
LRRC61	7q36.1	8.81	8.37	0.76	0.86	0.43	0.003231	0.0675	Over-expressed
ZNF786	7q36.1	7.96	7.67	0.49	0.62	0.29	0.003258	0.068	Over-expressed
RFTN2	2q33.1	4.88	5.52	1.12	1.28	-0.64	0.003267	0.0681	Under-expressed
NOMO1	16p13.11	11.83	12.17	0.64	0.62	-0.35	0.003273	0.0681	Under-expressed
RGS5	1q23.3	9.47	10.23	1.4	1.3	-0.75	0.003277	0.0681	Under-expressed
HOXD8	2q31.1	5.59	6.22	1.18	1.1	-0.63	0.003297	0.0684	Under-expressed
POLR2D	2q14.3	9.75	9.45	0.58	0.45	0.3	0.003318	0.0687	Over-expressed
KIAA1841	2p15	8.77	8.34	0.77	0.79	0.42	0.00333	0.0689	Over-expressed
IRF2	4q35.1	9.38	9.67	0.52	0.55	-0.29	0.003337	0.0689	Under-expressed
MAOA	Xp11.3	5.99	6.98	1.65	2.09	-0.98	0.003358	0.0691	Under-expressed
FAF2	5q35.2	10.39	10.65	0.47	0.48	-0.26	0.003358	0.0691	Under-expressed
ZNF205-AS1	16p13.3	2.28	2.77	0.9	0.92	-0.49	0.003365	0.0692	Under-expressed
TUBA8	22q11.21	6.37	5.82	1.03	1	0.56	0.003377	0.0693	Over-expressed
ZDHHC23	3q13.31	8.21	7.76	0.76	0.97	0.45	0.003386	0.0694	Over-expressed
MOSMO	16p12.2	7.66	7.93	0.5	0.47	-0.27	0.003396	0.0694	Under-expressed
EID1	15q21.1	10.64	11	0.59	0.78	-0.36	0.003399	0.0694	Under-expressed
PUM3	9p24.2	10.5	10.06	0.8	0.83	0.44	0.003415	0.0696	Over-expressed
RBM17	10p15.1	11.48	11.11	0.67	0.65	0.36	0.003419	0.0696	Over-expressed
CDC45	22q11.21	8.73	8.24	0.77	1.11	0.49	0.00342	0.0696	Over-expressed
SF3B2	11q13.1	12.51	12.3	0.39	0.41	0.21	0.003447	0.0699	Over-expressed
TCIM	8p11.21	7.97	8.88	1.66	1.67	-0.91	0.003448	0.0699	Under-expressed
EIF4G1	3q27.1	13.55	13.31	0.4	0.54	0.25	0.003455	0.0699	Over-expressed
WDCP	2p23.3	8.31	8.03	0.51	0.51	0.28	0.003456	0.0699	Over-expressed
TMEM201	1p36.22	9.3	8.95	0.57	0.75	0.34	0.003466	0.07	Over-expressed
ZCCHC24	10q22.3	8.18	8.77	1.1	1.05	-0.59	0.003519	0.0708	Under-expressed
LUC7L	16p13.3	8.87	9.26	0.69	0.76	-0.39	0.003521	0.0708	Under-expressed
SNRNP40	1p35.2	10.04	9.78	0.41	0.57	0.25	0.003526	0.0708	Over-expressed
TRPM4	19q13.33	8.67	9.28	1.14	1.08	-0.61	0.00353	0.0708	Under-expressed
VPS72	1q21.3	10.89	10.54	0.61	0.7	0.35	0.003539	0.0708	Over-expressed
RTF1	15q15.1	10.41	10.62	0.36	0.47	-0.22	0.00354	0.0708	Under-expressed
NR5A2	1q32.1	4.95	5.6	1.25	1.06	-0.65	0.003543	0.0708	Under-expressed
DPH2	1p34.1	9.78	9.49	0.51	0.61	0.3	0.003552	0.0709	Over-expressed
CNN2	19p13.3	11.31	11.81	0.93	0.91	-0.5	0.003562	0.0709	Under-expressed
CDC7	1p22.1	8.99	8.46	0.96	1	0.53	0.003564	0.0709	Over-expressed
ZWILCH	15q22.31	9.38	9.04	0.61	0.63	0.33	0.003582	0.0711	Over-expressed
HYAL1	3p21.31	4.54	5.32	1.38	1.59	-0.79	0.003582	0.0711	Under-expressed
LASP1	17q12	12.06	12.34	0.5	0.55	-0.28	0.003597	0.0713	Under-expressed
MSC	8q13.3	6.65	7.45	1.4	1.62	-0.8	0.003626	0.0717	Under-expressed
CHURC1	14q23.3	9.52	9.82	0.51	0.67	-0.3	0.003627	0.0717	Under-expressed
P4HA3	11q13.4	5.91	6.66	1.4	1.36	-0.75	0.003642	0.0718	Under-expressed
STARD13	13q13.1-q13.2	7.98	8.51	1.03	0.8	-0.52	0.003664	0.0722	Under-expressed
CAMSAP3	19p13.2	9.53	9.02	0.78	1.22	0.51	0.003673	0.0723	Over-expressed
TFAM	10q21.1	9.66	9.27	0.74	0.68	0.39	0.003681	0.0723	Over-expressed
XPNPEP1	10q25.1	10.44	10.21	0.44	0.43	0.23	0.003687	0.0723	Over-expressed
BEND3	6q21	8.5	8.1	0.66	0.86	0.39	0.0037	0.0723	Over-expressed
YEATS4	12q15	8.62	8.28	0.62	0.62	0.34	0.003701	0.0723	Over-expressed
SPDEF	6p21.31	6.3	7.84	2.66	3.21	-1.53	0.003703	0.0723	Under-expressed
SLC25A19	17q25.1	8.79	8.42	0.61	0.79	0.36	0.003706	0.0723	Over-expressed
NCBP2	3q29	11.33	11.02	0.61	0.53	0.32	0.003724	0.0725	Over-expressed
TOPBP1	3q22.1	10.61	10.23	0.67	0.74	0.37	0.003732	0.0725	Over-expressed
IGFBP4	17q21.2	11.99	12.58	1.09	1.14	-0.6	0.003745	0.0725	Under-expressed
SAR1B	5q31.1	8.69	9.01	0.56	0.69	-0.32	0.003745	0.0725	Under-expressed
DSN1	20q11.23	9.55	9.27	0.5	0.58	0.28	0.003747	0.0725	Over-expressed
SWAP70	11p15.4	10.4	10.76	0.62	0.77	-0.36	0.00375	0.0725	Under-expressed
SLC4A3	2q35	8.33	7.81	0.94	0.98	0.51	0.003761	0.0726	Over-expressed
FRS3	6p21.1	7	6.61	0.62	0.91	0.39	0.003764	0.0726	Over-expressed
AURKA	20q13.2	9.78	9.37	0.66	0.97	0.42	0.003769	0.0726	Over-expressed
UTRN	6q24.2	10.16	10.7	1.04	0.93	-0.54	0.003783	0.0727	Under-expressed
MSX1	4p16.2	4.9	5.57	1.23	1.22	-0.66	0.003808	0.0731	Under-expressed
GAL	11q13.2	7.02	5.7	2.35	2.65	1.32	0.003813	0.0731	Over-expressed
NAA35	9q21.33	9.11	8.81	0.53	0.6	0.3	0.003817	0.0731	Over-expressed
POLE	12q24.33	10.36	10.03	0.62	0.63	0.33	0.003824	0.0731	Over-expressed
FAM136A	2p13.3	10.62	10.3	0.56	0.64	0.31	0.003828	0.0731	Over-expressed
CCDC69	5q33.1	7.84	8.55	1.33	1.3	-0.71	0.003832	0.0731	Under-expressed
MRTFB	16p13.12	9.67	10.11	0.85	0.75	-0.44	0.003837	0.0731	Under-expressed
ADCY3	2p23.3	10.52	10.14	0.61	0.88	0.38	0.003849	0.0732	Over-expressed
UBALD1	16p13.3	8.17	8.57	0.74	0.73	-0.4	0.003863	0.0733	Under-expressed
CKAP2	13q14.3	10.2	9.77	0.8	0.81	0.43	0.003864	0.0733	Over-expressed
PDGFRB	5q32	10.61	11.26	1.25	1.09	-0.65	0.003889	0.0736	Under-expressed
DST	6p12.1	10.96	11.61	1.23	1.15	-0.65	0.003895	0.0736	Under-expressed
FEN1	11q12.2	10.47	10.08	0.72	0.74	0.39	0.003902	0.0736	Over-expressed
HJURP	2q37.1	9.39	8.96	0.64	1.09	0.43	0.003902	0.0736	Over-expressed
LPAR1	9q31.3	7.07	7.91	1.71	1.12	-0.84	0.003914	0.0737	Under-expressed
TOP2A	17q21.2	12.1	11.61	0.72	1.22	0.49	0.003933	0.0739	Over-expressed
SMC3	10q25.2	11.06	10.68	0.71	0.71	0.38	0.003934	0.0739	Over-expressed
SPAST	2p22.3	9.6	9.32	0.5	0.55	0.28	0.00394	0.0739	Over-expressed
ELL2	5q15	9.27	9.78	1	0.79	-0.51	0.003948	0.074	Under-expressed
MAPK11	22q13.33	7.11	7.7	1.13	1.03	-0.59	0.003959	0.074	Under-expressed
NSD2	4p16.3	11.26	10.91	0.6	0.75	0.35	0.003962	0.074	Over-expressed
MEF2C	5q14.3	8.56	9.13	1.12	0.92	-0.57	0.003968	0.074	Under-expressed
ERCC3	2q14.3	10.3	10.03	0.54	0.43	0.28	0.003969	0.074	Over-expressed
TRIM34	11p15.4	6.69	7.25	1.06	0.99	-0.56	0.003981	0.0741	Under-expressed
HERPUD1	16q13	10.94	11.3	0.64	0.71	-0.36	0.003996	0.0743	Under-expressed
RASGRP3	2p22.3	8.01	8.5	0.9	0.98	-0.49	0.004021	0.0746	Under-expressed
IFT57	3q13.12-q13.13	9.63	9.34	0.55	0.51	0.29	0.00404	0.0748	Over-expressed
DCTD	4q35.1	10.07	10.37	0.57	0.53	-0.3	0.004041	0.0748	Under-expressed
CEP55	10q23.33	9.96	9.47	0.77	1.16	0.49	0.004058	0.075	Over-expressed
HMCN1	1q25.3-q31.1	7.65	8.59	1.81	1.66	-0.94	0.004099	0.0757	Under-expressed
SKA3	13q12.11	8.74	8.26	0.8	1.11	0.48	0.004109	0.0757	Over-expressed
UBR1	15q15.2	8.65	9.07	0.78	0.79	-0.42	0.004114	0.0757	Under-expressed
ZBTB7A	19p13.3	9.07	9.37	0.6	0.47	-0.3	0.004124	0.0758	Under-expressed
FAM92A	8q22.1	7.44	6.81	1.16	1.25	0.64	0.004129	0.0758	Over-expressed
FBXO43	8q22.2	4.84	4.2	1.16	1.31	0.64	0.004143	0.076	Over-expressed
BCL6B	17p13.1	7.35	7.87	0.97	0.97	-0.52	0.00416	0.0761	Under-expressed
MCM6	2q21.3	11.24	10.86	0.69	0.79	0.38	0.004162	0.0761	Over-expressed
CASP8	2q33.1	8.69	9.1	0.78	0.69	-0.4	0.004177	0.0762	Under-expressed
FBXL16	16p13.3	6.47	7.5	1.9	1.99	-1.03	0.004185	0.0762	Under-expressed
LMO2	11p13	7.43	7.92	0.87	1.02	-0.49	0.00419	0.0762	Under-expressed
SNHG1	11q12.3	10.24	9.78	0.85	0.93	0.47	0.004193	0.0762	Over-expressed
PLSCR4	3q24	7.46	8.13	1.31	1.13	-0.67	0.004202	0.0762	Under-expressed
MIR17HG	13q31.3	5.49	4.81	1.32	1.15	0.68	0.004202	0.0762	Over-expressed
E2F6	2p25.1	8.78	8.5	0.53	0.52	0.28	0.004216	0.0763	Over-expressed
LMOD1	1q32.1	7.22	7.96	1.32	1.5	-0.73	0.004219	0.0763	Under-expressed
CLPX	15q22.31	9.65	9.38	0.46	0.59	0.27	0.004264	0.077	Over-expressed
FGGY	1p32.1	6.47	6.85	0.65	0.82	-0.38	0.004268	0.077	Under-expressed
HMGA1	6p21.31	12.21	11.75	0.87	0.88	0.46	0.004285	0.0771	Over-expressed
GLDC	9p24.1	6.44	4.93	2.87	2.77	1.51	0.004285	0.0771	Over-expressed
LIMCH1	4p13	9.6	10.35	1.45	1.3	-0.75	0.004289	0.0771	Under-expressed
LDHB	12p12.1	13.28	12.66	1.1	1.28	0.62	0.004316	0.0774	Over-expressed
FAM71E1	19q13.33	6.43	5.66	1.36	1.62	0.77	0.004316	0.0774	Over-expressed
ELFN1	7p22.3	4.72	5.22	0.88	1.05	-0.49	0.004335	0.0776	Under-expressed
ENPP2	8q24.12	8.22	9.02	1.42	1.7	-0.8	0.004343	0.0776	Under-expressed
LPXN	11q12.1	8.41	8.92	0.94	0.98	-0.51	0.00435	0.0776	Under-expressed
ITIH5	10p14	6.84	7.78	1.79	1.68	-0.93	0.00435	0.0776	Under-expressed
RPL36AL	14q21.3	10.95	11.3	0.57	0.81	-0.35	0.004357	0.0776	Under-expressed
LRG1	19p13.3	4.73	6.26	2.8	3.04	-1.52	0.004362	0.0776	Under-expressed
FBXO41	2p13.2	8.68	8.14	1.02	1.03	0.54	0.004382	0.0779	Over-expressed
FILIP1L	3q12.1	8.5	9.26	1.55	1.12	-0.76	0.004397	0.078	Under-expressed
ATP13A3	3q29	11.57	11.17	0.75	0.75	0.4	0.004404	0.078	Over-expressed
FLI1	11q24.3	7.98	8.55	1.13	1	-0.58	0.004413	0.078	Under-expressed
DCLRE1B	1p13.2	8.83	8.46	0.74	0.57	0.37	0.004415	0.078	Over-expressed
ZNF530	19q13.43	6.42	6.06	0.69	0.65	0.36	0.004416	0.078	Over-expressed
THY1	11q23.3	10.93	11.49	1.06	1.06	-0.56	0.004438	0.0782	Under-expressed
HEY1	8q21.13	6.97	7.62	1.26	1.19	-0.66	0.00444	0.0782	Under-expressed
C7ORF61	7q22.1	3.79	2.88	1.75	1.61	0.9	0.004463	0.0785	Over-expressed
P2RY14	3q25.1	4.52	5.18	1.25	1.21	-0.66	0.004475	0.0786	Under-expressed
CDKN2A	9p21.3	9.62	8.32	2.44	2.47	1.3	0.004496	0.0787	Over-expressed
GALNT6	12q13.13	9.01	9.73	1.36	1.37	-0.72	0.004502	0.0787	Under-expressed
CDR2	16p12.2	9.5	9.85	0.71	0.5	-0.35	0.004502	0.0787	Under-expressed
FRZB	2q32.1	6.77	7.87	1.93	2.41	-1.1	0.004506	0.0787	Under-expressed
CACNA1H	16p13.3	5.13	5.93	1.42	1.73	-0.8	0.004515	0.0788	Under-expressed
MARF1	16p13.11	10.49	10.78	0.56	0.54	-0.29	0.004533	0.0789	Under-expressed
LYG1	2q11.2	4.08	3.46	1.13	1.29	0.62	0.004534	0.0789	Over-expressed
RPL39L	3q27.3	9.07	8.63	0.78	0.95	0.44	0.004543	0.0789	Over-expressed
AP3B2	15q25.2	6.12	4.93	2.2	2.34	1.19	0.004547	0.0789	Over-expressed
CHST14	15q15.1	8.79	9.11	0.59	0.61	-0.32	0.004551	0.0789	Under-expressed
CILP	15q22.31	8.62	9.66	1.91	2.13	-1.04	0.004574	0.0792	Under-expressed
RILPL2	12q24.31	7.94	8.36	0.81	0.8	-0.43	0.004593	0.0794	Under-expressed
TMEM9B	11p15.4	9.79	10.06	0.5	0.5	-0.26	0.004595	0.0794	Under-expressed
E2F8	11p15.1	7.75	7.18	0.95	1.31	0.56	0.004614	0.0795	Over-expressed
CCNB2	15q22.2	10.02	9.56	0.73	1.09	0.45	0.004615	0.0795	Over-expressed
MFAP4	17p11.2	7.61	8.6	1.84	2.01	-1	0.004622	0.0796	Under-expressed
C17ORF53	17q21.31	7.26	6.87	0.69	0.82	0.39	0.004634	0.0797	Over-expressed
ITM2A	Xq21.1	7.16	8.06	1.75	1.62	-0.9	0.004648	0.0797	Under-expressed
MTERF1	7q21.2	8.03	7.74	0.53	0.63	0.3	0.004649	0.0797	Over-expressed
RTKN2	10q21.2	8.28	7.69	1.11	1.15	0.59	0.004654	0.0797	Over-expressed
FKBP7	2q31.2	7.81	8.21	0.78	0.72	-0.4	0.004661	0.0797	Under-expressed
ANO10	3p22.1-p21.33	9.36	9.73	0.72	0.66	-0.37	0.004679	0.0799	Under-expressed
PIP4K2A	10p12.2	9.31	9.67	0.72	0.57	-0.36	0.004701	0.0802	Under-expressed
NR1D1	17q21.1	7.86	8.32	0.89	0.79	-0.45	0.004731	0.0806	Under-expressed
TRIM5	11p15.4	8.17	8.71	1.11	0.81	-0.54	0.004768	0.081	Under-expressed
MTBP	8q24.12	8.11	7.65	0.77	1.08	0.46	0.004771	0.081	Over-expressed
EPB41L4A-DT	5q22.2	2.62	3.36	1.47	1.31	-0.75	0.004773	0.081	Under-expressed
LOC606724	16p11.2	4.66	5.25	0.99	1.39	-0.59	0.004786	0.0811	Under-expressed
ECT2	3q26.31	10.64	10.18	0.78	1.06	0.46	0.004789	0.0811	Over-expressed
SPOCK1	5q31.2	7.89	8.75	1.66	1.59	-0.86	0.004795	0.0811	Under-expressed
UBN1	16p13.3	10.46	10.78	0.65	0.56	-0.33	0.004797	0.0811	Under-expressed
TNFSF12	17p13.1	8.2	8.6	0.71	0.87	-0.4	0.004807	0.0811	Under-expressed
MED14	Xp11.4	10.71	10.39	0.6	0.61	0.32	0.004811	0.0811	Over-expressed
HNMT	2q22.1	8.61	9.03	0.84	0.74	-0.43	0.004835	0.0813	Under-expressed
TES	7q31.2	10.81	11.19	0.81	0.49	-0.38	0.004836	0.0813	Under-expressed
ZNF674-AS1	Xp11.3	6.32	5.96	0.66	0.74	0.36	0.004851	0.0815	Over-expressed
TMEM119	12q23.3	8.43	9.1	1.23	1.37	-0.67	0.004882	0.0818	Under-expressed
FAM173A	16p13.3	6.26	6.89	1.17	1.27	-0.63	0.004885	0.0818	Under-expressed
PUS7	7q22.3	9.72	9.37	0.6	0.83	0.36	0.004907	0.0821	Over-expressed
SNHG9	16p13.3	4.86	5.57	1.39	1.29	-0.71	0.004924	0.0823	Under-expressed
WDR4	21q22.3	8.37	7.99	0.72	0.75	0.38	0.004944	0.0825	Over-expressed
PTGER4	5p13.1	6.94	7.61	1.33	1.14	-0.67	0.004948	0.0825	Under-expressed
ILF3	19p13.2	12.84	12.6	0.46	0.43	0.24	0.004957	0.0825	Over-expressed
HSPB6	19q13.12	6.21	7.14	1.73	1.93	-0.93	0.004965	0.0826	Under-expressed
NUCB2	11p15.1	10.38	10.79	0.73	0.9	-0.41	0.004983	0.0827	Under-expressed
ZNF473	19q13.33	8.62	8.35	0.49	0.61	0.28	0.004989	0.0827	Over-expressed
TMEM150C	4q21.22	6.14	6.92	1.54	1.36	-0.78	0.004996	0.0827	Under-expressed
PTN	7q33	6.56	7.74	2.24	2.3	-1.18	0.005002	0.0827	Under-expressed
MIA2	14q21.1	9.39	9.73	0.6	0.79	-0.34	0.005005	0.0827	Under-expressed
KATNAL2	18q21.1	6.5	5.93	1.07	1.15	0.57	0.005034	0.0831	Over-expressed
TRPC6	11q22.1	5.11	5.69	1.18	0.96	-0.58	0.005069	0.0835	Under-expressed
PCGF6	10q24.33	8	7.67	0.67	0.59	0.34	0.005072	0.0835	Over-expressed
FBXL7	5p15.1	7.14	7.88	1.48	1.26	-0.74	0.005082	0.0836	Under-expressed
SH2B3	12q24.12	9.17	9.6	0.9	0.68	-0.44	0.005089	0.0836	Under-expressed
ARHGEF5	7q35	9.2	8.8	0.66	0.97	0.4	0.0051	0.0837	Over-expressed
UBE2D4	7p13	7.81	8.12	0.59	0.56	-0.3	0.005124	0.084	Under-expressed
ZNF282	7q36.1	9.78	9.52	0.46	0.57	0.26	0.005132	0.084	Over-expressed
STRBP	9q33.3	10.31	10	0.52	0.76	0.31	0.005148	0.0841	Over-expressed
CRIPT	2p21	9.07	8.78	0.58	0.53	0.29	0.00515	0.0841	Over-expressed
CX3CR1	3p22.2	5.28	6.2	1.8	1.68	-0.92	0.005157	0.0841	Under-expressed
FANCG	9p13.3	9.19	8.83	0.69	0.65	0.35	0.00517	0.0842	Over-expressed
DALRD3	3p21.31	8.54	8.87	0.56	0.8	-0.33	0.005204	0.0847	Under-expressed
CNOT10	3p22.3	9.69	9.44	0.49	0.45	0.25	0.005208	0.0847	Over-expressed
BCORL1	Xq26.1	8.83	8.51	0.6	0.64	0.32	0.005227	0.0848	Over-expressed
FAM117A	17q21.33	7.89	8.23	0.62	0.73	-0.34	0.005237	0.0848	Under-expressed
FOSB	19q13.32	7.35	8.32	1.77	2.11	-0.98	0.005238	0.0848	Under-expressed
AURKB	17p13.1	9.18	8.69	0.79	1.23	0.49	0.005238	0.0848	Over-expressed
CCDC150	2q33.1	5.94	5.37	1.03	1.23	0.57	0.005252	0.0849	Over-expressed
PPP1R3B	8p23.1	9.8	10.29	0.95	0.93	-0.49	0.005272	0.085	Under-expressed
BHLHE40	3p26.1	11.35	11.95	1.21	1.07	-0.61	0.005275	0.085	Under-expressed
BTG2	1q32.1	10.18	10.71	1.01	1.06	-0.53	0.005287	0.085	Under-expressed
FBXO45	3q29	9.98	9.63	0.64	0.72	0.35	0.005289	0.085	Over-expressed
OTUD3	1p36.13	8.26	7.88	0.73	0.78	0.39	0.005293	0.085	Over-expressed
RAD21	8q24.11	13.48	13.05	0.77	0.93	0.43	0.005301	0.085	Over-expressed
SERF2	15q15.3	12.61	13.02	0.75	0.91	-0.41	0.005302	0.085	Under-expressed
RUNDC3B	7q21.12	3.37	4.16	1.53	1.55	-0.79	0.005317	0.0851	Under-expressed
PCDH7	4p15.1	7.03	7.86	1.6	1.62	-0.83	0.005326	0.0851	Under-expressed
STK17B	2q32.3	9.69	10.15	0.9	0.85	-0.46	0.005328	0.0851	Under-expressed
AKAP13	15q25.3	11.06	11.46	0.77	0.74	-0.39	0.005352	0.0853	Under-expressed
RAD54B	8q22.1	8.19	7.81	0.62	0.92	0.37	0.005355	0.0853	Over-expressed
ARF3	12q13.12	12.04	12.24	0.36	0.44	-0.2	0.005356	0.0853	Under-expressed
UHRF2	9p24.1	10.05	9.69	0.73	0.68	0.37	0.005378	0.0854	Over-expressed
JAM3	11q25	7.86	8.43	1.08	1.13	-0.57	0.005382	0.0854	Under-expressed
MVP	16p11.2	10.79	11.3	0.98	1.03	-0.52	0.005385	0.0854	Under-expressed
FGD5	3p25.1	8.03	8.64	1.19	1.15	-0.61	0.005389	0.0854	Under-expressed
PDGFA	7p22.3	7.83	8.32	0.92	1.02	-0.49	0.005407	0.0855	Under-expressed
TRPV1	17p13.2	7.35	6.94	0.74	0.89	0.41	0.005411	0.0855	Over-expressed
UBAP2	9p13.3	10.51	10.21	0.57	0.6	0.3	0.005412	0.0855	Over-expressed
RCOR2	11q13.1	8.01	7.15	1.5	1.98	0.86	0.005435	0.0857	Over-expressed
CCNA2	4q27	10.02	9.59	0.7	1.06	0.43	0.005464	0.0861	Over-expressed
CCDC18	1p22.1	7.31	6.89	0.76	0.89	0.42	0.005472	0.0861	Over-expressed
LAMA4	6q21	10.23	10.79	1.14	0.94	-0.56	0.005486	0.0861	Under-expressed
ZEB1	10p11.22	7.99	8.64	1.32	1.05	-0.64	0.005487	0.0861	Under-expressed
SSC5D	19q13.42	7.07	7.76	1.34	1.34	-0.69	0.005506	0.0863	Under-expressed
PHF12	17q11.2	9.72	9.94	0.37	0.54	-0.22	0.005509	0.0863	Under-expressed
NPDC1	9q34.3	8.93	9.59	1.24	1.36	-0.66	0.005523	0.0864	Under-expressed
CAB39L	13q14.2	7.94	8.48	0.93	1.25	-0.53	0.00553	0.0864	Under-expressed
ID3	1p36.12	8.93	9.46	1.01	1.09	-0.53	0.005556	0.0867	Under-expressed
UBE2S	19q13.42	9.72	9.25	0.81	1.06	0.46	0.005588	0.0871	Over-expressed
RABEP2	16p11.2	8.45	8.87	0.74	0.92	-0.41	0.005615	0.0875	Under-expressed
ARHGAP11A	15q13.3	9.58	9.16	0.66	1.06	0.42	0.005638	0.0877	Over-expressed
ARHGAP6	Xp22.2	4.54	5.23	1.42	1.18	-0.69	0.005688	0.0884	Under-expressed
CBR4	4q32.3	8.09	8.5	0.81	0.76	-0.41	0.005698	0.0885	Under-expressed
ASB8	12q13.11	8.9	9.11	0.42	0.42	-0.21	0.005712	0.0886	Under-expressed
PPP1R3C	10q23.32	5.23	6.18	1.87	1.78	-0.95	0.005744	0.0886	Under-expressed
DCLRE1C	10p13	9.1	8.78	0.56	0.74	0.32	0.005748	0.0886	Over-expressed
ZNF639	3q26.33	9.93	9.66	0.48	0.63	0.27	0.005748	0.0886	Over-expressed
RCN2	15q24.3	10.87	10.5	0.7	0.76	0.37	0.005749	0.0886	Over-expressed
GLT8D2	12q23.3	7.28	7.88	1.2	1.13	-0.61	0.005761	0.0886	Under-expressed
ROGDI	16p13.3	8.44	8.88	0.86	0.83	-0.44	0.005762	0.0886	Under-expressed
TEX10	9q31.1	9.6	9.27	0.64	0.6	0.32	0.005766	0.0886	Over-expressed
FOS	14q24.3	10.21	10.97	1.37	1.67	-0.75	0.005773	0.0886	Under-expressed
CPPED1	16p13.12	8.6	9.22	1.23	1.1	-0.61	0.005774	0.0886	Under-expressed
AMPH	7p14.1	4.26	5.3	2.15	1.67	-1.04	0.005822	0.0891	Under-expressed
NMNAT3	3q23	6.86	6.12	1.38	1.62	0.75	0.005827	0.0891	Over-expressed
ZNF326	1p22.2	9.25	8.99	0.46	0.59	0.26	0.005828	0.0891	Over-expressed
CASP4	11q22.3	9.14	9.6	0.95	0.79	-0.46	0.005834	0.0891	Under-expressed
ACVR2B	3p22.2	8.61	8.18	0.85	0.82	0.43	0.005838	0.0891	Over-expressed
METTL9	16p12.2	10.88	11.12	0.52	0.38	-0.25	0.005843	0.0891	Under-expressed
CELSR2	1p13.3	10.72	10.15	1.1	1.15	0.57	0.005864	0.0893	Over-expressed
ACAD9	3q21.3	10.27	9.96	0.62	0.57	0.31	0.005867	0.0893	Over-expressed
TMEFF1	9q31.1	7.36	6.71	1.29	1.2	0.65	0.00588	0.0893	Over-expressed
MCM3	6p12.2	12.13	11.78	0.67	0.73	0.35	0.005883	0.0893	Over-expressed
CEBPZ	2p22.2	10.78	10.53	0.47	0.52	0.25	0.005897	0.0894	Over-expressed
PLXNA4	7q32.3	5.92	6.86	1.91	1.66	-0.94	0.005905	0.0894	Under-expressed
CFI	4q25	7.63	8.4	1.44	1.65	-0.77	0.005924	0.0896	Under-expressed
ODC1	2p25.1	11.22	10.82	0.77	0.8	0.4	0.005928	0.0896	Over-expressed
SEMA6B	19p13.3	6.88	7.41	0.91	1.27	-0.53	0.005938	0.0896	Under-expressed
RAD9A	11q13.2	8.3	7.99	0.61	0.6	0.31	0.005939	0.0896	Over-expressed
SPIN4	Xq11.1	8.27	7.78	0.96	0.95	0.49	0.005947	0.0896	Over-expressed
NOP10	15q14	9.85	10.17	0.6	0.7	-0.32	0.005952	0.0896	Under-expressed
PARPBP	12q23.2	7.83	7.46	0.71	0.75	0.37	0.005966	0.0897	Over-expressed
KPNA2	17q24.2	12.35	11.98	0.63	0.89	0.37	0.005989	0.0899	Over-expressed
NAALADL1	11q13.1	4.34	4.89	1.08	1.06	-0.55	0.006006	0.0901	Under-expressed
MRPL33	2p23.2	9.2	8.98	0.42	0.46	0.22	0.006036	0.0904	Over-expressed
TXNIP	1q21.1	12.44	12.92	0.93	0.96	-0.48	0.006042	0.0904	Under-expressed
TBX15	1p12	5.65	6.41	1.61	1.15	-0.76	0.006048	0.0904	Under-expressed
TRIM41	5q35.3	8.71	9.03	0.61	0.61	-0.31	0.006054	0.0904	Under-expressed
DVL3	3q27.1	11.63	11.38	0.45	0.53	0.24	0.006076	0.0907	Over-expressed
TLR3	4q35.1	5.91	6.6	1.36	1.36	-0.69	0.006092	0.0907	Under-expressed
SQOR	15q21.1	9.99	10.41	0.83	0.84	-0.42	0.006094	0.0907	Under-expressed
SRSF12	6q15	6.52	5.73	1.47	1.76	0.8	0.006107	0.0908	Over-expressed
CARD6	5p13.1	7.41	7.97	1.14	0.98	-0.56	0.006128	0.091	Under-expressed
CARHSP1	16p13.2	10.34	10.69	0.69	0.64	-0.35	0.006134	0.091	Under-expressed
PHF10	6q27	10.68	10.34	0.7	0.62	0.34	0.006149	0.091	Over-expressed
SRRM2-AS1	16p13.3	3.05	3.57	0.99	1.07	-0.52	0.006152	0.091	Under-expressed
SMNDC1	10q25.2	9.77	9.54	0.46	0.47	0.23	0.006154	0.091	Over-expressed
JAZF1	7p15.2-p15.1	8	8.37	0.78	0.63	-0.38	0.006173	0.0912	Under-expressed
FAM107A	3p14.3-p14.2	6.69	7.96	2.55	2.36	-1.27	0.006176	0.0912	Under-expressed
STAG3L1	7q11.23	6.16	5.58	1.1	1.21	0.58	0.006219	0.0917	Over-expressed
GALK2	15q21.1-q21.2	8.25	8.54	0.56	0.59	-0.29	0.006237	0.0919	Under-expressed
YBX1	1p34.2	13.64	13.33	0.55	0.76	0.32	0.006258	0.0921	Over-expressed
ZNF398	7q36.1	9.31	9.03	0.59	0.48	0.28	0.006266	0.0921	Over-expressed
PCSK5	9q21.13	4.95	5.89	1.98	1.48	-0.94	0.006282	0.0922	Under-expressed
NSMCE1	16p12.1	9.45	9.76	0.58	0.69	-0.31	0.006294	0.0923	Under-expressed
CCT4	2p15	12.54	12.29	0.47	0.58	0.25	0.006317	0.0925	Over-expressed
NOMO3	16p13.11	10.37	10.74	0.73	0.77	-0.38	0.006337	0.0927	Under-expressed
AKIP1	11p15.4	7.72	8.07	0.74	0.62	-0.36	0.006373	0.093	Under-expressed
U2SURP	3q23	11.4	11.15	0.47	0.55	0.25	0.006375	0.093	Over-expressed
AMIGO1	1p13.3	6.29	5.77	0.95	1.19	0.52	0.00638	0.093	Over-expressed
JKAMP	14q23.1	9.09	9.33	0.46	0.52	-0.24	0.006384	0.093	Under-expressed
PAPSS2	10q23.2-q23.31	9.05	9.78	1.38	1.55	-0.73	0.006414	0.0932	Under-expressed
IBA57	1q42.13	8.52	8.11	0.82	0.75	0.41	0.006419	0.0932	Over-expressed
MAST3	19p13.11	7.89	8.23	0.65	0.69	-0.33	0.006419	0.0932	Under-expressed
DUSP1	5q35.1	10.02	10.66	1.24	1.31	-0.64	0.006426	0.0932	Under-expressed
CDT1	16q24.3	9.33	8.87	0.8	1.12	0.46	0.006437	0.0932	Over-expressed
RIBC2	22q13.31	5.76	5.13	1.29	1.14	0.63	0.006439	0.0932	Over-expressed
TBP	6q27	8.4	8.12	0.55	0.53	0.28	0.006441	0.0932	Over-expressed
DCAF12	9p13.3	11.02	10.72	0.6	0.56	0.3	0.006448	0.0932	Over-expressed
SUOX	12q13.2	8.47	8.77	0.56	0.67	-0.3	0.006454	0.0932	Under-expressed
HAUS5	19q13.12	9.1	8.71	0.81	0.67	0.39	0.00646	0.0932	Over-expressed
PIGQ	16p13.3	9.18	9.59	0.82	0.77	-0.41	0.006531	0.094	Under-expressed
CIB1	15q26.1	10.27	10.69	0.81	0.86	-0.42	0.006535	0.094	Under-expressed
FYCO1	3p21.31	9.31	9.69	0.76	0.7	-0.38	0.006539	0.094	Under-expressed
RNF40	16p11.2	11.08	11.31	0.45	0.42	-0.22	0.006552	0.0941	Under-expressed
TIPIN	15q22.31	7.44	7.08	0.69	0.76	0.36	0.006558	0.0941	Over-expressed
FOXA1	14q21.1	6.25	7.68	2.71	3.11	-1.43	0.006598	0.0945	Under-expressed
STK17A	7p13	9.1	9.45	0.66	0.78	-0.35	0.006614	0.0947	Under-expressed
FRMD4B	3p14.1	8.14	8.68	1.17	0.85	-0.55	0.006636	0.0949	Under-expressed
BLM	15q26.1	8.56	8.16	0.71	0.97	0.4	0.006644	0.0949	Over-expressed
LINC00926	15q21.3	3.98	4.64	1.03	1.78	-0.66	0.006656	0.095	Under-expressed
MSRB3	12q14.3	8.34	8.99	1.31	1.22	-0.65	0.006671	0.095	Under-expressed
UCP3	11q13.4	4.76	4.41	0.66	0.77	0.35	0.006671	0.095	Over-expressed
NEPRO	3q13.2	10.16	9.95	0.4	0.48	0.22	0.006676	0.095	Over-expressed
IDH1	2q34	10.84	11.28	0.91	0.84	-0.45	0.006695	0.0951	Under-expressed
ST8SIA4	5q21.1	7.86	8.36	1.05	0.9	-0.51	0.006702	0.0951	Under-expressed
CIP2A	3q13.13	8.6	8.17	0.78	1.04	0.44	0.006722	0.0953	Over-expressed
CD3EAP	19q13.32	9.4	9.12	0.54	0.58	0.28	0.006733	0.0954	Over-expressed
ATP10D	4p12	8.11	8.59	1.02	0.81	-0.49	0.006745	0.0954	Under-expressed
RACGAP1	12q13.12	10.37	10.02	0.6	0.88	0.35	0.00675	0.0954	Over-expressed
ZFP3	17p13.2	8.12	7.82	0.58	0.64	0.3	0.006784	0.0958	Over-expressed
TRIM3	11p15.4	7.24	7.61	0.68	0.86	-0.37	0.006799	0.0959	Under-expressed
TMEM229B	14q24.1	6.93	7.51	1.17	1.11	-0.58	0.006838	0.0962	Under-expressed
RNF135	17q11.2	8.7	9.02	0.68	0.54	-0.32	0.006838	0.0962	Under-expressed
ITPR1	3p26.1	8.15	8.82	1.39	1.23	-0.67	0.006846	0.0962	Under-expressed
ATP6V1B1	2p13.3	8.11	7.11	1.84	2.25	0.99	0.006857	0.0962	Over-expressed
CHST1	11p11.2	6.38	7.21	1.58	1.83	-0.83	0.00686	0.0962	Under-expressed
URB2	1q42.13	9.54	9.2	0.64	0.75	0.34	0.006864	0.0962	Over-expressed
EDNRA	4q31.22-q31.23	7.91	8.54	1.28	1.14	-0.62	0.006872	0.0962	Under-expressed
ZNF286A	17p12	9.17	8.77	0.73	0.95	0.4	0.006886	0.0962	Over-expressed
CD248	11q13.2	9.06	9.61	1.05	1.22	-0.55	0.006887	0.0962	Under-expressed
TELO2	16p13.3	9.1	9.47	0.73	0.81	-0.38	0.006889	0.0962	Under-expressed
RYR1	19q13.2	8.08	7.16	1.77	1.99	0.92	0.006893	0.0962	Over-expressed
CENPL	1q25.1	8.55	8.23	0.56	0.76	0.31	0.006901	0.0962	Over-expressed
SDHAP1	3q29	7.48	7.09	0.8	0.79	0.4	0.006908	0.0962	Over-expressed
SUPT7L	2p23.3	10.15	9.96	0.37	0.41	0.19	0.006933	0.0963	Over-expressed
AP3M2	8p11.21	9.42	9.03	0.83	0.66	0.39	0.00695	0.0963	Over-expressed
BMP4	14q22.2	5.08	5.89	1.56	1.71	-0.8	0.006952	0.0963	Under-expressed
RAB40C	16p13.3	8.79	9.17	0.77	0.71	-0.38	0.006961	0.0963	Under-expressed
DNMT1	19p13.2	11.57	11.19	0.77	0.73	0.38	0.006963	0.0963	Over-expressed
JUN	1p32.1	11.46	11.86	0.7	1	-0.4	0.006967	0.0963	Under-expressed
SIAE	11q24.2	8.54	9	0.9	0.92	-0.45	0.006969	0.0963	Under-expressed
METRN	16p13.3	6.27	7.31	2.01	2.17	-1.03	0.006977	0.0963	Under-expressed
DAPK2	15q22.31	8.48	7.88	1.2	1.2	0.6	0.006993	0.0963	Over-expressed
FAM43A	3q29	6.86	7.35	0.87	1.17	-0.49	0.006997	0.0963	Under-expressed
TSHZ2	20q13.2	5.19	6.09	1.87	1.65	-0.9	0.006999	0.0963	Under-expressed
LY96	8q21.11	6.45	6.91	0.92	0.94	-0.46	0.007001	0.0963	Under-expressed
PRRX1	1q24.2	9.89	10.57	1.47	1.05	-0.68	0.007019	0.0965	Under-expressed
PLN	6q22.31	4.38	5.17	1.64	1.47	-0.79	0.007029	0.0965	Under-expressed
GTPBP4	10p15.3	11.36	11.01	0.67	0.77	0.35	0.007037	0.0965	Over-expressed
PYCARD	16p11.2	8.14	8.78	1.2	1.44	-0.64	0.007044	0.0965	Under-expressed
NEMP1	12q13.3	9.72	9.39	0.64	0.72	0.33	0.007066	0.0967	Over-expressed
STUB1	16p13.3	10.06	10.45	0.79	0.77	-0.39	0.007098	0.0971	Under-expressed
SLC25A52	18q12.1	3.14	2.8	0.64	0.78	0.34	0.007112	0.0972	Over-expressed
CH25H	10q23.31	4.55	5.32	1.49	1.62	-0.77	0.007133	0.0973	Under-expressed
LRRN4CL	11q12.3	3.05	3.99	1.91	1.77	-0.93	0.007134	0.0973	Under-expressed
PLEC	8q24.3	12.62	12.98	0.7	0.78	-0.36	0.007149	0.0973	Under-expressed
CSRP1	1q32.1	12.17	12.6	0.82	0.94	-0.43	0.007149	0.0973	Under-expressed
KLF9	9q21.12	9.09	9.52	0.85	0.91	-0.43	0.007176	0.0975	Under-expressed
TXLNG	Xp22.2	8.21	7.73	0.94	1.04	0.48	0.007176	0.0975	Over-expressed
CSRNP1	3p22.2	8.83	9.25	0.83	0.82	-0.41	0.0072	0.0977	Under-expressed
ZDHHC13	11p15.1	9.4	9.05	0.63	0.88	0.36	0.007206	0.0977	Over-expressed
NOL11	17q24.2	10.61	10.33	0.54	0.61	0.28	0.007222	0.0978	Over-expressed
SH3D19	4q31.3	9.2	9.71	1.08	0.85	-0.51	0.007241	0.098	Under-expressed
NAP1L1	12q21.2	13.08	12.8	0.59	0.54	0.29	0.007268	0.0981	Over-expressed
POLR3E	16p12.2	9.29	9.54	0.55	0.37	-0.25	0.007273	0.0981	Under-expressed
UCHL5	1q31.2	9.81	9.51	0.59	0.64	0.3	0.007274	0.0981	Over-expressed
USP2	11q23.3	6.73	6.08	1.23	1.45	0.65	0.007292	0.0982	Over-expressed
SH3PXD2B	5q35.1	10.87	11.23	0.74	0.65	-0.36	0.00732	0.0985	Under-expressed
DEPDC1B	5q12.1	7.9	7.43	0.84	1.12	0.47	0.007324	0.0985	Over-expressed
RBM14	11q13.2	10.31	10.17	0.29	0.3	0.14	0.007329	0.0985	Over-expressed
MTFMT	15q22.31	7.72	7.48	0.5	0.44	0.24	0.00737	0.0989	Over-expressed
CENPF	1q41	12.11	11.63	0.79	1.25	0.48	0.007384	0.099	Over-expressed
SYNE1	6q25.2	8.84	9.5	1.43	1.06	-0.66	0.007431	0.0993	Under-expressed
RCC2	1p36.13	12.87	12.63	0.42	0.61	0.24	0.007436	0.0993	Over-expressed
CKAP2L	2q14.1	8.36	7.82	0.99	1.28	0.54	0.007439	0.0993	Over-expressed
OPA1	3q29	11.17	10.89	0.51	0.65	0.28	0.007443	0.0993	Over-expressed
ADAM33	20p13	3.65	4.52	1.58	2.09	-0.87	0.007443	0.0993	Under-expressed
EME1	17q21.33	6.88	6.45	0.78	1	0.42	0.007468	0.0996	Over-expressed
USP4	3p21.31	10.13	10.32	0.38	0.42	-0.19	0.007479	0.0996	Under-expressed
MALL	2q13	9.21	9.94	1.45	1.57	-0.74	0.007485	0.0996	Under-expressed
GINS1	20p11.21	9.27	8.84	0.82	0.95	0.43	0.007503	0.0996	Over-expressed
IFNGR1	6q23.3	10.76	11.15	0.84	0.65	-0.39	0.007506	0.0996	Under-expressed
CLN3	16p12.1	10.07	10.41	0.68	0.71	-0.34	0.007506	0.0996	Under-expressed
ZSCAN16	6p22.1	7.51	7.1	0.72	1.03	0.41	0.007524	0.0996	Over-expressed
NOVA2	19q13.32	4.4	4.85	0.89	0.95	-0.45	0.007528	0.0996	Under-expressed
STOML2	9p13.3	11.28	10.97	0.64	0.63	0.32	0.007552	0.0996	Over-expressed
GLYCTK	3p21.2	5.39	5.8	0.75	1	-0.42	0.007555	0.0996	Under-expressed
NOVA1	14q12	3.48	4.44	1.99	1.83	-0.96	0.007556	0.0996	Under-expressed
GOLGA2P5	12q23.1	7.13	6.6	1.04	1.14	0.53	0.007577	0.0996	Over-expressed
EEF1AKMT3	12q14.1	7.84	8.09	0.45	0.58	-0.25	0.007582	0.0996	Under-expressed
DNAJA1	9p21.1	12.26	11.99	0.52	0.56	0.26	0.007584	0.0996	Over-expressed
GTF2IP1	7q11.23	12.68	12.43	0.52	0.48	0.25	0.007585	0.0996	Over-expressed
SCARA3	8p21.1	9.16	10.06	1.94	1.48	-0.9	0.007594	0.0996	Under-expressed
PAXBP1	21q22.11	9.75	9.44	0.64	0.66	0.32	0.007598	0.0996	Over-expressed
MOCS2	5q11.2	8.77	9.09	0.61	0.74	-0.33	0.007602	0.0996	Under-expressed
UBC	12q24.31	14.8	15.04	0.49	0.47	-0.24	0.007602	0.0996	Under-expressed
SMAP2	1p34.2	9.68	10.04	0.73	0.68	-0.36	0.007612	0.0996	Under-expressed
ESCO2	8p21.1	7.54	7.07	0.9	1.07	0.47	0.007615	0.0996	Over-expressed
NME3	16p13.3	8.37	8.97	1.26	1.15	-0.61	0.007628	0.0996	Under-expressed
JAG1	20p12.2	9.93	10.49	1.14	1.12	-0.56	0.00764	0.0996	Under-expressed
GINS4	8p11.21	8.97	8.45	0.98	1.2	0.52	0.007648	0.0996	Over-expressed
ATP6V1E1	22q11.21	10.93	11.14	0.4	0.41	-0.2	0.007649	0.0996	Under-expressed
TBCK	4q24	8.34	8.68	0.72	0.58	-0.34	0.00766	0.0997	Under-expressed
NTAN1	16p13.11	9.22	9.56	0.75	0.54	-0.34	0.007682	0.0998	Under-expressed
COQ10B	2q33.1	9.01	9.24	0.44	0.51	-0.23	0.007682	0.0998	Under-expressed
C9ORF40	9q21.13	7.92	7.54	0.72	0.86	0.38	0.0077	0.0999	Over-expressed
HDAC7	12q13.11	10.13	10.39	0.51	0.55	-0.26	0.007739	0.1	Under-expressed
CLEC11A	19q13.33	7	7.57	1.13	1.23	-0.58	0.00776	0.101	Under-expressed
COL11A2	6p21.32	6.6	5.19	2.95	2.61	1.41	0.007814	0.101	Over-expressed
PCOLCE	7q22.1	9.94	10.48	1.02	1.27	-0.54	0.007829	0.101	Under-expressed
DLEU2	13q14.2	5.98	5.46	1.1	0.92	0.52	0.007831	0.101	Over-expressed
SPG11	15q21.1	9.81	10.1	0.51	0.75	-0.29	0.007846	0.101	Under-expressed
PAQR4	16p13.3	9.99	10.37	0.72	0.92	-0.39	0.007847	0.101	Under-expressed
RRM2	2p25.1	10.83	10.42	0.71	1.07	0.41	0.007891	0.102	Over-expressed
CLCN7	16p13.3	10.29	10.71	0.93	0.65	-0.42	0.007905	0.102	Under-expressed
PODXL2	3q21.3	10.3	9.74	1.12	1.2	0.56	0.007916	0.102	Over-expressed
LINC00312	3p25.3	4.08	4.59	0.98	1.17	-0.51	0.007917	0.102	Under-expressed
WASF1	6q21	8.39	7.87	0.94	1.26	0.52	0.007926	0.102	Over-expressed
AQP1	7p14.3	10.42	11.12	1.46	1.36	-0.7	0.007946	0.102	Under-expressed
TAF1A	1q41	6.98	6.61	0.73	0.82	0.37	0.007951	0.102	Over-expressed
MRPL28	16p13.3	9.59	10	0.85	0.81	-0.41	0.007955	0.102	Under-expressed
IPW	15q11.2	6.26	7.14	1.84	1.67	-0.88	0.008007	0.102	Under-expressed
VPS35L	16p12.3	9.75	10.03	0.53	0.62	-0.28	0.008087	0.103	Under-expressed
TXNRD3NB	3q21.3	8.34	8.02	0.65	0.63	0.32	0.008087	0.103	Over-expressed
PMS2P3	7q11.23	5.69	5.3	0.8	0.79	0.39	0.008096	0.103	Over-expressed
CES2	16q22.1	9.3	9.55	0.47	0.58	-0.25	0.008115	0.103	Under-expressed
TESMIN	11q13.3	8.33	7.81	1.07	1.04	0.52	0.008125	0.103	Over-expressed
MSH6	2p16.3	11.5	11.16	0.68	0.71	0.34	0.008164	0.104	Over-expressed
IFI27L2	14q32.12	7.1	7.59	0.94	1.11	-0.49	0.008174	0.104	Under-expressed
RNF8	6p21.2	9.4	9.06	0.72	0.66	0.34	0.008209	0.104	Over-expressed
SLC7A2	8p22	6.6	7.63	2.11	2.04	-1.02	0.008217	0.104	Under-expressed
KIF17	1p36.12	3.69	4.23	1.09	1.16	-0.54	0.008268	0.105	Under-expressed
CCT2	12q15	11.95	11.68	0.56	0.57	0.28	0.008272	0.105	Over-expressed
HDGF	1q23.1	13.8	13.52	0.5	0.69	0.28	0.008332	0.105	Over-expressed
UBE2C	20q13.12	10.62	10.12	0.9	1.25	0.5	0.008361	0.106	Over-expressed
LMCD1	3p25.3	9.09	9.5	0.83	0.87	-0.41	0.008388	0.106	Under-expressed
ASPH	8q12.3	11.77	12.17	0.74	0.96	-0.4	0.00839	0.106	Under-expressed
GIMAP8	7q36.1	7.37	7.95	1.23	1.07	-0.58	0.008393	0.106	Under-expressed
GEMIN4	17p13.3	9.69	9.41	0.56	0.56	0.28	0.008397	0.106	Over-expressed
DAB2	5p13.1	9.87	10.37	1.08	0.81	-0.49	0.008409	0.106	Under-expressed
JUNB	19p13.13	10.64	11.09	0.87	1.03	-0.45	0.008414	0.106	Under-expressed
GNAI2	3p21.31	12.27	12.54	0.53	0.57	-0.26	0.008441	0.106	Under-expressed
PCNX3	11q13.1	10.8	10.54	0.55	0.51	0.26	0.008471	0.106	Over-expressed
UNKL	16p13.3	7.91	8.24	0.69	0.65	-0.33	0.008479	0.106	Under-expressed
UBFD1	16p12.2	10.42	10.7	0.61	0.53	-0.29	0.0085	0.106	Under-expressed
HSPBAP1	3q21.1	7.78	7.51	0.51	0.65	0.27	0.008517	0.106	Over-expressed
BNC2	9p22.3-p22.2	6.5	7.2	1.5	1.29	-0.7	0.008522	0.106	Under-expressed
NDC80	18p11.32	9.42	8.95	0.81	1.25	0.47	0.008528	0.106	Over-expressed
HR	8p21.3	9.71	9.07	1.17	1.55	0.63	0.00853	0.106	Over-expressed
GPC2	7q22.1	6.48	5.63	1.68	1.94	0.86	0.008539	0.106	Over-expressed
PARN	16p13.12	10.32	10.53	0.42	0.41	-0.2	0.00854	0.106	Under-expressed
C11ORF96	11p11.2	6.91	7.47	1.04	1.38	-0.56	0.008575	0.107	Under-expressed
NCAPD2	12p13.31	11.87	11.44	0.91	0.86	0.44	0.008613	0.107	Over-expressed
TYMS	18p11.32	10.43	9.92	1.02	1.1	0.51	0.008614	0.107	Over-expressed
ANKHD1-EIF4EBP3	5q31.3	8.77	9.15	0.83	0.68	-0.38	0.008617	0.107	Under-expressed
ATP2B1-AS1	12q21.33	4.1	4.61	0.97	1.21	-0.51	0.008646	0.107	Under-expressed
DDX12P	12p13.31	7.28	6.79	1.01	0.95	0.48	0.008692	0.108	Over-expressed
DKC1	Xq28	11.51	11.23	0.56	0.59	0.28	0.00872	0.108	Over-expressed
FAM241B	10q22.1	8.29	7.86	0.85	0.94	0.43	0.008762	0.108	Over-expressed
TBC1D9	4q31.21	9.18	9.74	1.1	1.23	-0.56	0.008779	0.108	Under-expressed
SULT1A1	16p11.2	7.26	7.81	1.11	1.18	-0.55	0.008786	0.108	Under-expressed
OPTN	10p13	11.58	11.17	0.79	0.97	0.41	0.008789	0.108	Over-expressed
THOC6	16p13.3	8.97	9.29	0.62	0.75	-0.32	0.008824	0.109	Under-expressed
SPARC	5q33.1	14.48	14.98	1.07	0.99	-0.51	0.008834	0.109	Under-expressed
DHX9	1q25.3	12.47	12.25	0.46	0.45	0.22	0.008882	0.109	Over-expressed
DVL2	17p13.1	9.5	9.25	0.51	0.52	0.25	0.008896	0.109	Over-expressed
CENPI	Xq22.1	7.01	6.46	1.01	1.36	0.55	0.008913	0.109	Over-expressed
FXR2	17p13.1	9.81	9.56	0.52	0.54	0.25	0.008933	0.11	Over-expressed
SNRNP25	16p13.3	8.99	9.37	0.77	0.78	-0.37	0.00895	0.11	Under-expressed
SP140L	2q37.1	7.63	8.15	1.15	0.89	-0.52	0.00895	0.11	Under-expressed
UTP25	1q32.2	10.1	9.78	0.61	0.73	0.31	0.009027	0.11	Over-expressed
ACTR6	12q23.1	9.45	9.16	0.59	0.64	0.29	0.009048	0.11	Over-expressed
PRDM6	5q23.2	3.49	4.15	1.42	1.24	-0.66	0.009048	0.11	Under-expressed
PPP1R12B	1q32.1	9.21	9.63	0.82	0.96	-0.42	0.009073	0.111	Under-expressed
USP1	1p31.3	11.33	10.92	0.82	0.93	0.42	0.00909	0.111	Over-expressed
GPR68	14q32.11	6.89	7.4	1.02	1.16	-0.51	0.009108	0.111	Under-expressed
ANKRD50	4q28.1	9.56	9.99	0.89	0.9	-0.43	0.009125	0.111	Under-expressed
TMPO	12q23.1	11.27	10.92	0.72	0.68	0.34	0.009126	0.111	Over-expressed
FANCB	Xp22.2	5.84	5.41	0.84	1.03	0.44	0.009153	0.111	Over-expressed
WDR33	2q14.3	10.63	10.44	0.41	0.28	0.18	0.009157	0.111	Over-expressed
TSPAN31	12q14.1	9.03	9.34	0.64	0.64	-0.31	0.009158	0.111	Under-expressed
CPE	4q32.3	9.13	9.76	1.32	1.28	-0.63	0.009168	0.111	Under-expressed
TXNDC15	5q31.1	9.66	9.87	0.43	0.44	-0.21	0.009174	0.111	Under-expressed
ABCF2	7q36.1	10.87	10.62	0.52	0.51	0.25	0.00918	0.111	Over-expressed
RHOA	3p21.31	13.19	13.38	0.39	0.43	-0.19	0.009181	0.111	Under-expressed
MMP2	16q12.2	11.95	12.62	1.45	1.24	-0.67	0.009183	0.111	Under-expressed
PRR5L	11p13-p12	7.04	7.51	0.94	1.05	-0.47	0.009191	0.111	Under-expressed
MEX3A	1q22	11.12	10.48	1.09	1.77	0.65	0.009271	0.111	Over-expressed
KIAA1191	5q35.2	10.7	10.98	0.61	0.5	-0.28	0.009284	0.111	Under-expressed
PLA2G5	1p36.13	2.88	3.58	1.41	1.56	-0.7	0.009294	0.111	Under-expressed
PTBP2	1p21.3	8.82	8.37	0.98	0.78	0.45	0.0093	0.111	Over-expressed
LY86	6p25.1	6.47	6.97	1.05	1.05	-0.51	0.009302	0.111	Under-expressed
DTL	1q32.3	9.58	9.18	0.7	1.03	0.4	0.009306	0.111	Over-expressed
AGPS	2q31.2	9.98	9.68	0.56	0.76	0.3	0.009306	0.111	Over-expressed
RIOK2	5q15	8.61	8.83	0.46	0.42	-0.22	0.009309	0.111	Under-expressed
MAPRE2	18q12.1-q12.2	9.64	10.02	0.79	0.79	-0.38	0.009309	0.111	Under-expressed
HIKESHI	11q14.2	9.16	8.91	0.53	0.5	0.25	0.009312	0.111	Over-expressed
RPH3AL	17p13.3	5.48	6.02	1.03	1.32	-0.54	0.00933	0.111	Under-expressed
SLC25A18	22q11.21	2.46	3.14	1.15	1.86	-0.68	0.009332	0.111	Under-expressed
ZBTB5	9p13.2	9.51	9.21	0.62	0.67	0.31	0.009348	0.111	Over-expressed
FAM110A	20p13	8.69	9.14	0.96	0.9	-0.45	0.009396	0.112	Under-expressed
PITPNC1	17q24.2	7.94	8.32	0.77	0.86	-0.38	0.009403	0.112	Under-expressed
PRTFDC1	10p12.1	8.2	7.47	1.46	1.62	0.73	0.009412	0.112	Over-expressed
ECHDC3	10p14	8.82	8.22	1.21	1.38	0.61	0.00942	0.112	Over-expressed
CEP72	5p15.33	6.87	6.44	0.88	0.95	0.43	0.009432	0.112	Over-expressed
SRSF4	1p35.3	11.15	10.96	0.36	0.45	0.19	0.009498	0.113	Over-expressed
ADGRA2	8p11.23	9	9.46	0.91	1.01	-0.45	0.009511	0.113	Under-expressed
GIMAP7	7q36.1	7.12	7.79	1.42	1.37	-0.68	0.009543	0.113	Under-expressed
ORC3	6q15	9.75	9.48	0.51	0.67	0.27	0.00956	0.113	Over-expressed
CXCL12	10q11.21	9.96	10.58	1.35	1.16	-0.62	0.009602	0.113	Under-expressed
KITLG	12q21.32	8.18	8.81	1.26	1.41	-0.63	0.009608	0.113	Under-expressed
FBXW7	4q31.3	8.6	8.92	0.66	0.7	-0.32	0.009625	0.113	Under-expressed
PCED1B	12q13.11	7.09	7.63	1.15	1.1	-0.54	0.009625	0.113	Under-expressed
OSGIN1	16q23.3	6.13	6.68	1.06	1.35	-0.56	0.009646	0.114	Under-expressed
RPIA	2p11.2	9.57	9.29	0.63	0.53	0.29	0.009652	0.114	Over-expressed
CUL2	10p11.21	10.26	9.99	0.54	0.6	0.27	0.009693	0.114	Over-expressed
MAP3K1	5q11.2	9.51	9.92	0.83	0.9	-0.41	0.009697	0.114	Under-expressed
ZNF75A	16p13.3	8.42	8.63	0.37	0.56	-0.21	0.009731	0.114	Under-expressed
CNN1	19p13.2	6.97	7.75	1.47	1.9	-0.77	0.009737	0.114	Under-expressed
RGS2	1q31.2	9.15	9.81	1.15	1.77	-0.66	0.009765	0.114	Under-expressed
LPAR6	13q14.2	8.27	8.76	1.07	0.92	-0.49	0.009769	0.114	Under-expressed
DISC1	1q42.2	7.04	7.49	0.98	0.85	-0.45	0.00979	0.115	Under-expressed
SNHG12	1p35.3	8.38	7.97	0.82	0.88	0.4	0.009818	0.115	Over-expressed
FAM20B	1q25.2	11.23	10.96	0.55	0.6	0.27	0.009849	0.115	Over-expressed
TMEM59	1p32.3	12.03	12.28	0.5	0.52	-0.24	0.009906	0.115	Under-expressed
ANKRD29	18q11.2	3.77	4.42	1.29	1.53	-0.65	0.009906	0.115	Under-expressed
AKAP12	6q25.1	7.72	8.44	1.53	1.5	-0.73	0.009956	0.116	Under-expressed
TMEM163	2q21.3	4.49	5.17	1.39	1.45	-0.67	0.009963	0.116	Under-expressed
PLA2G4A	1q31.1	6.55	7.6	2.36	1.73	-1.05	0.01	0.116	Under-expressed
PARVA	11p15.3	10.47	10.77	0.65	0.57	-0.3	0.01	0.116	Under-expressed
SLC7A8	14q11.2	8.47	9.05	1.2	1.29	-0.59	0.01	0.116	Under-expressed
SLC16A1	1p13.2	10.76	10.18	1.14	1.35	0.58	0.01	0.116	Over-expressed
LRRFIP1	2q37.3	10.91	11.24	0.7	0.67	-0.33	0.0101	0.117	Under-expressed
SHISAL2A	1p32.3	2.7	3.36	1.35	1.46	-0.66	0.0101	0.117	Under-expressed
LOC727896	18p11.31	5.29	4.97	0.69	0.68	0.33	0.0101	0.117	Over-expressed
TBC1D8	2q11.2	8.99	9.44	0.9	1	-0.44	0.0102	0.117	Under-expressed
TTC7B	14q32.11	8.46	8.16	0.58	0.73	0.3	0.0102	0.117	Over-expressed
OR51E1	11p15.4	4.3	4.85	1.16	1.13	-0.55	0.0102	0.117	Under-expressed
GM2A	5q33.1	10.89	11.26	0.8	0.75	-0.37	0.0102	0.117	Under-expressed
FBRS	16p11.2	10.38	10.62	0.51	0.54	-0.25	0.0102	0.117	Under-expressed
PLK4	4q28.1	8.47	8.1	0.63	1	0.36	0.0102	0.117	Over-expressed
ETFBKMT	12p11.21	4.97	5.31	0.72	0.68	-0.34	0.0102	0.117	Under-expressed
LPCAT2	16q12.2	8.52	8.98	0.94	1.04	-0.46	0.0102	0.118	Under-expressed
DACT3	19q13.32	5.54	6.16	1.33	1.26	-0.62	0.0103	0.118	Under-expressed
FAM171A1	10p13	10.57	10.02	1.06	1.33	0.55	0.0103	0.118	Over-expressed
CCL22	16q21	5.98	6.85	1.93	1.56	-0.87	0.0103	0.118	Under-expressed
OLFML2B	1q23.3	9.5	10.01	1.05	1.13	-0.51	0.0103	0.118	Under-expressed
SKP2	5p13.2	8.55	8.06	1	1.1	0.49	0.0103	0.118	Over-expressed
FNTA	8p11.21	11.15	10.82	0.68	0.74	0.33	0.0103	0.118	Over-expressed
YRDC	1p34.3	9.15	8.88	0.58	0.59	0.28	0.0104	0.118	Over-expressed
POLA1	Xp22.11-p21.3	9.35	9.04	0.66	0.63	0.31	0.0104	0.118	Over-expressed
FKBP11	12q13.12	8.91	9.35	0.91	0.95	-0.44	0.0104	0.118	Under-expressed
MAPK10	4q21.3	4.8	5.89	2.35	2.2	-1.09	0.0104	0.119	Under-expressed
SH3D21	1p34.3	6.88	6.4	0.97	1.08	0.48	0.0104	0.119	Over-expressed
C1QTNF2	5q33.3	3.83	4.67	1.73	1.82	-0.83	0.0104	0.119	Under-expressed
DBIL5P	17p13.3	3.65	3.13	1.07	1.11	0.52	0.0105	0.119	Over-expressed
PARL	3q27.1	10.22	9.95	0.55	0.56	0.26	0.0105	0.119	Over-expressed
PAMR1	11p13	5.16	5.84	1.38	1.49	-0.67	0.0105	0.119	Under-expressed
SIX4	14q23.1	8.56	8.17	0.72	1	0.39	0.0105	0.119	Over-expressed
CCT3	1q22	13.58	13.33	0.5	0.59	0.25	0.0105	0.119	Over-expressed
TMBIM6	12q13.12	13.61	13.85	0.43	0.59	-0.23	0.0105	0.119	Under-expressed
RGL1	1q25.3	8.79	9.23	0.97	0.8	-0.44	0.0105	0.119	Under-expressed
HOPX	4q12	6.78	7.34	1.12	1.28	-0.56	0.0106	0.119	Under-expressed
PRELID3A	18p11.21	6.73	6.27	0.9	1.1	0.46	0.0106	0.12	Over-expressed
CENPK	5q12.3	6.81	6.42	0.75	0.98	0.39	0.0106	0.12	Over-expressed
FMO4	1q24.3	6.34	6.87	1.15	1.04	-0.53	0.0107	0.12	Under-expressed
SLC35G1	10q23.33	6.61	6.19	0.89	0.87	0.42	0.0107	0.12	Over-expressed
TMEM86A	11p15.1	7.53	8	0.81	1.27	-0.46	0.0107	0.121	Under-expressed
PARS2	1p32.3	7.7	7.47	0.44	0.58	0.23	0.0107	0.121	Over-expressed
FCMR	1q32.1	7.05	7.8	1.6	1.62	-0.76	0.0107	0.121	Under-expressed
PDGFC	4q32.1	8.31	8.93	1.34	1.3	-0.63	0.0107	0.121	Under-expressed
CCT6P1	7q11.21	6.56	6.23	0.74	0.61	0.33	0.0108	0.121	Over-expressed
MRPL11	11q13.2	10.06	9.75	0.66	0.6	0.3	0.0108	0.121	Over-expressed
FAM72D	1q21.1	7.21	6.61	1.16	1.48	0.6	0.0108	0.121	Over-expressed
ACPP	3q22.1	3.71	4.56	1.77	1.89	-0.85	0.0108	0.121	Under-expressed
FSD1L	9q31.2	6.23	5.69	1.21	1.02	0.55	0.0108	0.121	Over-expressed
NCAPH	2q11.2	9.25	8.86	0.7	1.03	0.39	0.0108	0.121	Over-expressed
CCDC14	3q21.1	10.37	9.99	0.75	0.92	0.38	0.0108	0.121	Over-expressed
NUSAP1	15q15.1	10.41	10.04	0.64	0.99	0.36	0.0108	0.121	Over-expressed
VWA5A	11q24.2	8.26	8.87	1.35	1.15	-0.61	0.0108	0.121	Under-expressed
HSD17B2	16q23.3	4.62	5.74	2.31	2.46	-1.11	0.0109	0.121	Under-expressed
MPHOSPH6	16q23.3	8.79	9.12	0.61	0.89	-0.33	0.0109	0.121	Under-expressed
PM20D2	6q15	9.51	8.93	1.21	1.27	0.58	0.0109	0.121	Over-expressed
ATG2A	11q13.1	9.38	9.12	0.54	0.57	0.26	0.0109	0.121	Over-expressed
NUP205	7q33	11.28	10.95	0.69	0.76	0.33	0.0109	0.121	Over-expressed
SRPK1	6p21.31	11.47	11.15	0.64	0.8	0.33	0.0109	0.121	Over-expressed
MS4A7	11q12.2	7.95	8.48	1.17	1.03	-0.53	0.011	0.121	Under-expressed
CCDC159	19p13.2	6.38	6.8	0.81	1.03	-0.42	0.011	0.121	Under-expressed
RDH14	2p24.2	9	8.78	0.46	0.49	0.22	0.011	0.122	Over-expressed
C10ORF25	10q11.21	6.04	5.63	0.86	0.87	0.41	0.0111	0.123	Over-expressed
RASSF5	1q32.1	8.75	9.26	1.1	1.08	-0.51	0.0111	0.123	Under-expressed
VASN	16p13.3	8.95	9.49	1.1	1.21	-0.53	0.0111	0.123	Under-expressed
RPRD1A	18q12.2	10.53	10.22	0.64	0.74	0.32	0.0111	0.123	Over-expressed
IQCB1	3q13.33|3q21.1	9.45	9.13	0.69	0.65	0.32	0.0112	0.123	Over-expressed
SMPDL3A	6q22.31	7.21	7.7	1.03	1.1	-0.49	0.0112	0.123	Under-expressed
ABHD1	2p23.3	3.29	2.55	1.6	1.56	0.75	0.0112	0.123	Over-expressed
WDR35	2p24.1	9.05	8.65	0.85	0.89	0.4	0.0112	0.124	Over-expressed
TUSC2	3p21.31	8.65	8.89	0.48	0.59	-0.24	0.0112	0.124	Under-expressed
C16ORF71	16p13.3	2.97	3.51	1.12	1.25	-0.54	0.0113	0.124	Under-expressed
ZNF594	17p13.2	7.44	7.06	0.78	0.92	0.39	0.0113	0.124	Over-expressed
LENG9	19q13.42	6.47	6.94	0.98	1.05	-0.47	0.0113	0.124	Under-expressed
ZNF777	7q36.1	9.18	8.93	0.51	0.55	0.25	0.0113	0.124	Over-expressed
SLC14A1	18q12.3	3.26	4.09	1.75	1.81	-0.83	0.0113	0.124	Under-expressed
ITM2B	13q14.2	12.54	12.83	0.58	0.74	-0.3	0.0113	0.124	Under-expressed
PDLIM1	10q23.33	10.55	11.01	0.99	0.94	-0.46	0.0113	0.124	Under-expressed
CLIC2	Xq28	7.51	8.03	1.06	1.18	-0.52	0.0113	0.124	Under-expressed
EGFL7	9q34.3	7.81	8.39	1.19	1.32	-0.58	0.0113	0.124	Under-expressed
PNO1	2p14	9.69	9.48	0.4	0.49	0.2	0.0113	0.124	Over-expressed
APIP	11p13	8.94	8.58	0.81	0.7	0.36	0.0114	0.124	Over-expressed
KIAA0513	16q24.1	8.19	8.73	1.22	0.93	-0.54	0.0114	0.124	Under-expressed
SLC41A3	3q21.2-q21.3	10.29	10.01	0.59	0.62	0.28	0.0114	0.124	Over-expressed
KLHL24	3q27.1	10.66	10.34	0.66	0.77	0.32	0.0114	0.124	Over-expressed
RPA1	17p13.3	11.38	11.17	0.43	0.5	0.21	0.0114	0.124	Over-expressed
GLDN	15q21.2	3.41	4.31	2	1.7	-0.9	0.0114	0.124	Under-expressed
AGMAT	1p36.21	5.82	5.34	0.9	1.26	0.48	0.0114	0.124	Over-expressed
IPO4	14q12	10.42	10.15	0.54	0.63	0.27	0.0115	0.124	Over-expressed
PPP1R9A	7q21.3	9	8.48	0.8	1.59	0.52	0.0115	0.124	Over-expressed
FAM86JP	3q21.2	6.21	5.81	0.88	0.83	0.4	0.0115	0.124	Over-expressed
SNORD1C	17q25.1	5.07	4.59	1.04	1.01	0.48	0.0116	0.125	Over-expressed
GMFG	19q13.2	7.74	8.22	1	1.1	-0.48	0.0116	0.126	Under-expressed
PODN	1p32.3	8.02	8.84	1.86	1.52	-0.82	0.0117	0.126	Under-expressed
SLC35D2	9q22.32	8.75	8.43	0.73	0.58	0.32	0.0117	0.126	Over-expressed
VN1R1	19q13.43	3.48	2.92	1.22	1.15	0.56	0.0117	0.126	Over-expressed
GBA2	9p13.3	9.97	9.7	0.61	0.49	0.27	0.0117	0.126	Over-expressed
RRP12	10q24.1	10.31	10.03	0.58	0.61	0.28	0.0117	0.126	Over-expressed
FAM214B	9p13.3	8.57	8.86	0.6	0.64	-0.29	0.0117	0.126	Under-expressed
PTK6	20q13.33	6.09	7.17	2.41	2.06	-1.08	0.0117	0.126	Under-expressed
ROBO1	3p12.3	9.12	9.74	1.38	1.23	-0.62	0.0117	0.126	Under-expressed
ZBTB4	17p13.1	10.33	10.57	0.52	0.49	-0.24	0.0117	0.126	Under-expressed
MGAT2	14q21.3	9.38	9.61	0.48	0.5	-0.23	0.0118	0.126	Under-expressed
NINL	20p11.21	8.67	8.16	1.09	1.07	0.5	0.0118	0.127	Over-expressed
PGS1	17q25.3	9.2	8.96	0.5	0.54	0.24	0.0119	0.127	Over-expressed
GNGT2	17q21.32	4.11	4.6	1.09	0.94	-0.49	0.0119	0.127	Under-expressed
CPSF3	2p25.1	10.45	10.18	0.56	0.61	0.27	0.0119	0.127	Over-expressed
DPP4	2q24.2	6.46	7.34	2	1.59	-0.88	0.0119	0.127	Under-expressed
ZNF664	12q24.31	12.03	11.69	0.72	0.72	0.33	0.0119	0.127	Over-expressed
ZNF286B	17p11.2	6.17	5.62	1.05	1.42	0.55	0.012	0.128	Over-expressed
ZNF714	19p12	7.97	7.43	1.18	1.1	0.54	0.012	0.128	Over-expressed
CHP1	15q15.1	10.98	11.25	0.57	0.59	-0.27	0.0121	0.128	Under-expressed
DPT	1q24.2	7.58	8.48	2.06	1.57	-0.9	0.0121	0.128	Under-expressed
NSUN5	7q11.23	9.6	9.29	0.7	0.64	0.32	0.0121	0.128	Over-expressed
CD200	3q13.2	7.35	7.93	1.34	1	-0.58	0.0121	0.128	Under-expressed
HLA-DQB2	6p21.32	6.34	7.17	1.69	1.99	-0.83	0.0121	0.128	Under-expressed
DDX55	12q24.31	9.16	8.9	0.57	0.53	0.26	0.0121	0.128	Over-expressed
RHOH	4p14	6.25	7.02	1.64	1.69	-0.77	0.0121	0.128	Under-expressed
ACOT7	1p36.31	9.72	9.38	0.68	0.88	0.35	0.0121	0.128	Over-expressed
GIMAP6	7q36.1	7.93	8.5	1.28	1.13	-0.57	0.0121	0.128	Under-expressed
ECM2	9q22.31	7.04	7.75	1.66	1.17	-0.71	0.0122	0.128	Under-expressed
PIGX	3q29	9.6	9.28	0.73	0.62	0.32	0.0122	0.129	Over-expressed
RCAN2	6p12.3	7.35	7.86	1.13	1.02	-0.51	0.0122	0.129	Under-expressed
KIF14	1q32.1	8.86	8.37	0.89	1.32	0.49	0.0122	0.129	Over-expressed
CREBZF	11q14.1	10.32	10.01	0.68	0.63	0.31	0.0122	0.129	Over-expressed
DLG4	17p13.1	7.06	7.41	0.76	0.75	-0.35	0.0122	0.129	Under-expressed
NEGR1	1p31.1	5.4	6.36	2.3	1.45	-0.97	0.0123	0.129	Under-expressed
ANKMY2	7p21.1	7.89	8.19	0.61	0.73	-0.3	0.0123	0.129	Under-expressed
TMEM88	17p13.1	3.81	4.38	1.14	1.39	-0.57	0.0123	0.129	Under-expressed
F2RL3	19p13.11	5.66	6.19	1.08	1.26	-0.53	0.0123	0.129	Under-expressed
RRP1	21q22.3	10.15	9.75	0.82	0.92	0.39	0.0123	0.129	Over-expressed
CADPS2	7q31.32	8.33	9.03	1.58	1.37	-0.7	0.0124	0.129	Under-expressed
RTN2	19q13.32	6.82	7.36	1.21	1.09	-0.55	0.0124	0.129	Under-expressed
CIAO2A	15q22.31	9.8	9.55	0.54	0.5	0.24	0.0124	0.13	Over-expressed
FRAT2	10q24.1	9.12	8.79	0.71	0.73	0.33	0.0124	0.13	Over-expressed
ARMH4	14q23.1	5.37	6.03	1.53	1.19	-0.66	0.0125	0.13	Under-expressed
PIK3C3	18q12.3	9.19	8.92	0.61	0.57	0.27	0.0125	0.13	Over-expressed
SRPX	Xp11.4	7.51	8.12	1.34	1.32	-0.61	0.0125	0.13	Under-expressed
PTX3	3q25.32	7.39	6.37	2.13	2.4	1.03	0.0126	0.131	Over-expressed
ATOX1	5q33.1	9.47	9.85	0.83	0.79	-0.38	0.0126	0.131	Under-expressed
HVCN1	12q24.11	6.74	7.14	0.72	1.14	-0.4	0.0126	0.131	Under-expressed
ACYP1	14q24.3	6.8	6.38	0.9	0.89	0.41	0.0126	0.131	Over-expressed
NTN1	17p13.1	9.03	8.41	1.16	1.71	0.62	0.0126	0.131	Over-expressed
COMMD2	3q25.1	10.24	9.96	0.62	0.6	0.28	0.0126	0.131	Over-expressed
ANKRD49	11q21	8.21	7.96	0.52	0.61	0.25	0.0126	0.131	Over-expressed
RGS3	9q32	9.69	9.94	0.49	0.65	-0.25	0.0126	0.131	Under-expressed
NAAA	4q21.1	8.55	9	0.97	0.99	-0.45	0.0126	0.131	Under-expressed
LTBP2	14q24.3	10.65	11.15	1.11	1.1	-0.51	0.0127	0.131	Under-expressed
NDUFAF1	15q15.1	7.77	7.99	0.41	0.6	-0.22	0.0127	0.131	Under-expressed
ADD1	4p16.3	11.6	11.82	0.47	0.48	-0.22	0.0127	0.131	Under-expressed
ZFYVE16	5q14.1	9.25	9.55	0.66	0.63	-0.3	0.0127	0.131	Under-expressed
UBE2T	1q32.1	9.58	9.16	0.72	1.18	0.41	0.0127	0.131	Over-expressed
PGF	14q24.3	7.01	7.48	0.85	1.3	-0.47	0.0127	0.131	Under-expressed
PRSS27	16p13.3	6.08	6.93	1.84	1.8	-0.84	0.0127	0.131	Under-expressed
AP3B1	5q14.1	10.01	10.22	0.47	0.43	-0.21	0.0128	0.131	Under-expressed
ORC4	2q23.1	9.31	9.08	0.51	0.47	0.23	0.0128	0.131	Over-expressed
SERPINF1	17p13.3	10.81	11.37	1.26	1.1	-0.56	0.0128	0.131	Under-expressed
CIT	12q24.23	9.35	9.02	0.58	0.91	0.32	0.0128	0.131	Over-expressed
POM121	7q11.23	11.35	11.12	0.52	0.47	0.23	0.0128	0.131	Over-expressed
ST3GAL2	16q22.1	8.38	8.69	0.53	0.88	-0.3	0.0128	0.131	Under-expressed
NAT1	8p22	5.71	6.38	1.47	1.38	-0.66	0.0128	0.131	Under-expressed
BMP2	20p12.3	5.09	5.93	1.86	1.73	-0.84	0.0128	0.131	Under-expressed
HSPD1	2q33.1	13.45	13.18	0.54	0.68	0.27	0.0128	0.131	Over-expressed
GLIPR1	12q21.2	9.08	9.57	1.13	0.87	-0.49	0.0129	0.132	Under-expressed
ABCC9	12p12.1	6.47	7.16	1.57	1.33	-0.69	0.0129	0.132	Under-expressed
FRY	13q13.1	7.61	8.2	1.35	1.12	-0.59	0.0129	0.132	Under-expressed
FUT1	19q13.33	7.22	6.73	0.98	1.2	0.48	0.0129	0.132	Over-expressed
TCF19	6p21.33	10.15	9.74	0.88	0.95	0.42	0.0129	0.132	Over-expressed
TTYH3	7p22.3	11.32	11.7	0.79	0.88	-0.38	0.013	0.132	Under-expressed
SGCD	5q33.2-q33.3	6.56	7.29	1.69	1.3	-0.73	0.013	0.133	Under-expressed
RPS27L	15q22.2	9.34	9.58	0.48	0.58	-0.24	0.013	0.133	Under-expressed
COBLL1	2q24.3	8.7	9.14	0.89	1.08	-0.44	0.013	0.133	Under-expressed
SIDT2	11q23.3	9.47	9.8	0.78	0.6	-0.34	0.0131	0.133	Under-expressed
ARHGAP32	11q24.3	9.7	10.05	0.71	0.87	-0.35	0.0131	0.133	Under-expressed
HNRNPA3P1	10q11.21	7.14	6.9	0.52	0.55	0.24	0.0131	0.133	Over-expressed
LZTS1	8p21.3	7.75	8.27	1.19	0.96	-0.52	0.0131	0.133	Under-expressed
HLA-DMA	6p21.32	10.03	10.54	1.12	1.13	-0.52	0.0131	0.133	Under-expressed
DNAJA3	16p13.3	10.23	10.47	0.55	0.46	-0.24	0.0131	0.133	Under-expressed
POM121C	7q11.23	10	9.76	0.53	0.47	0.24	0.0132	0.133	Over-expressed
DGKA	12q13.2	8.42	8.84	0.87	0.99	-0.42	0.0132	0.134	Under-expressed
CIRBP	19p13.3	11.06	11.34	0.53	0.79	-0.28	0.0132	0.134	Under-expressed
MGC57346	17q21.31	7.61	7.31	0.66	0.64	0.3	0.0133	0.134	Over-expressed
UBTD2	5q35.1	9.5	9.76	0.6	0.52	-0.26	0.0133	0.134	Under-expressed
PRDM15	21q22.3	8.18	7.98	0.47	0.37	0.2	0.0134	0.135	Over-expressed
FIBIN	11p14.2	7.63	8.35	1.65	1.37	-0.72	0.0134	0.135	Under-expressed
C1ORF115	1q41	8.68	9.3	1.36	1.33	-0.62	0.0134	0.135	Under-expressed
THAP12	11q13.5	10.7	10.42	0.61	0.62	0.28	0.0134	0.135	Over-expressed
PIP5K1A	1q21.3	11.1	10.82	0.59	0.65	0.28	0.0134	0.135	Over-expressed
TARS2	1q21.2	9.83	9.54	0.69	0.54	0.3	0.0134	0.135	Over-expressed
ACSS3	12q21.31	6.1	6.92	1.69	2.03	-0.82	0.0135	0.136	Under-expressed
MSMO1	4q32.3	9.62	10.05	0.94	0.96	-0.43	0.0135	0.136	Under-expressed
ALX3	1p13.3	5.24	4.57	1.45	1.46	0.66	0.0135	0.136	Over-expressed
KCNK6	19q13.2	7.41	7.97	1.29	1.09	-0.56	0.0136	0.136	Under-expressed
CCDC77	12p13.33	8.59	8.2	0.84	0.9	0.39	0.0136	0.136	Over-expressed
C1QTNF6	22q12.3	8.7	9.18	1.05	1.04	-0.48	0.0136	0.136	Under-expressed
XPO5	6p21.1	11.35	11.06	0.57	0.79	0.3	0.0136	0.136	Over-expressed
DMD	Xp21.2-p21.1	8.15	8.8	1.35	1.58	-0.65	0.0136	0.136	Under-expressed
CEP78	9q21.2	8.67	8.37	0.64	0.71	0.3	0.0137	0.136	Over-expressed
DLG2	11q14.1	3.32	4.24	2.21	1.52	-0.93	0.0137	0.136	Under-expressed
FBN1	15q21.1	10.93	11.62	1.59	1.29	-0.69	0.0137	0.136	Under-expressed
NT5C2	10q24.32-q24.33	11.08	10.82	0.57	0.58	0.26	0.0137	0.136	Over-expressed
PFDN5	12q13.13	11.46	11.73	0.55	0.65	-0.26	0.0137	0.136	Under-expressed
NUBP2	16p13.3	9.44	9.82	0.81	0.84	-0.37	0.0137	0.136	Under-expressed
ITPRIPL2	16p12.3	10.04	10.54	1.2	0.85	-0.51	0.0138	0.137	Under-expressed
KIF20B	10q23.31	9.05	8.68	0.78	0.88	0.37	0.0138	0.137	Over-expressed
MRTO4	1p36.13	10.42	10.14	0.6	0.64	0.28	0.0138	0.137	Over-expressed
PLK2	5q11.2	10.09	10.53	0.96	1.04	-0.45	0.0138	0.137	Under-expressed
CD59	11p13	13.55	13.94	0.8	0.94	-0.39	0.0139	0.137	Under-expressed
ARHGEF3	3p14.3	9.1	9.46	0.81	0.69	-0.35	0.0139	0.137	Under-expressed
LRFN4	11q13.2	9.48	8.93	1.18	1.24	0.55	0.0139	0.137	Over-expressed
HAGH	16p13.3	8.62	8.98	0.83	0.75	-0.37	0.0139	0.137	Under-expressed
PGM5	9q21.11	4.55	5.45	2.1	1.73	-0.91	0.0139	0.137	Under-expressed
MYO19	17q12	9.92	9.64	0.6	0.65	0.28	0.0139	0.137	Over-expressed
MED30	8q24.11	8.47	8.13	0.73	0.81	0.34	0.014	0.138	Over-expressed
ORMDL3	17q21.1	10.24	10.49	0.48	0.67	-0.25	0.014	0.138	Under-expressed
KMO	1q43	6.35	7.11	1.7	1.6	-0.76	0.014	0.138	Under-expressed
SPRYD4	12q13.3	7.85	8.15	0.68	0.64	-0.3	0.014	0.138	Under-expressed
ZDHHC18	1p36.11	10.27	10.05	0.44	0.58	0.22	0.0141	0.139	Over-expressed
DPEP2	16q22.1	4.37	4.98	1.3	1.39	-0.6	0.0141	0.139	Under-expressed
C19ORF57	19p13.12	6.98	6.42	1.14	1.4	0.56	0.0142	0.139	Over-expressed
HOXB4	17q21.32	4.81	5.56	1.72	1.47	-0.75	0.0142	0.139	Under-expressed
PPM1E	17q22	5.3	4.28	2.36	1.94	1.02	0.0142	0.139	Over-expressed
GATA2	3q21.3	5.18	6.04	1.9	1.93	-0.87	0.0142	0.139	Under-expressed
ENPP1	6q23.2	8.16	8.82	1.46	1.43	-0.66	0.0142	0.139	Under-expressed
TARBP1	1q42.2	10.39	10.01	0.83	0.86	0.38	0.0142	0.139	Over-expressed
DCUN1D1	3q26.33	9.63	9.35	0.58	0.66	0.27	0.0142	0.139	Over-expressed
VCAN	5q14.2-q14.3	11.77	12.41	1.5	1.19	-0.64	0.0142	0.139	Under-expressed
TCF25	16q24.3	10.76	11	0.49	0.58	-0.24	0.0142	0.139	Under-expressed
BEX2	Xq22.2	8.04	7.37	1.44	1.58	0.67	0.0142	0.139	Over-expressed
VAX2	2p13.3	5.8	5.05	1.44	2.08	0.76	0.0143	0.139	Over-expressed
PARP6	15q23	10.05	9.73	0.74	0.58	0.31	0.0143	0.139	Over-expressed
NUDT9	4q22.1	8.97	9.26	0.62	0.69	-0.29	0.0143	0.139	Under-expressed
PID1	2q36.3	5.97	6.62	1.42	1.44	-0.65	0.0143	0.139	Under-expressed
CPSF7	11q12.2	11.18	10.98	0.48	0.38	0.2	0.0144	0.14	Over-expressed
CDYL2	16q23.2	4.61	5.36	1.83	1.17	-0.75	0.0144	0.14	Under-expressed
MRPS34	16p13.3	9.82	10.22	0.89	0.84	-0.4	0.0144	0.14	Under-expressed
CFH	1q31.3	9.3	9.89	1.34	1.15	-0.58	0.0145	0.14	Under-expressed
MAPK3	16p11.2	10.08	10.28	0.46	0.45	-0.21	0.0145	0.141	Under-expressed
ZNF256	19q13.43	7.15	6.78	0.74	0.97	0.37	0.0145	0.141	Over-expressed
ORC5	7q22.1-q22.2	9	8.79	0.44	0.54	0.21	0.0146	0.141	Over-expressed
FOPNL	16p13.11	9.44	9.73	0.72	0.44	-0.29	0.0146	0.141	Under-expressed
MAP7D2	Xp22.12	5.64	4.49	2.47	2.66	1.14	0.0146	0.141	Over-expressed
ERCC6L	Xq13.1	7.97	7.59	0.73	1.03	0.38	0.0146	0.141	Over-expressed
ATPAF2	17p11.2	7.59	7.9	0.71	0.6	-0.31	0.0146	0.141	Under-expressed
RPP38-DT	10p13	3.15	2.72	0.92	1.05	0.44	0.0146	0.141	Over-expressed
HERC3	4q22.1	8.34	8.79	0.96	1.03	-0.44	0.0146	0.141	Under-expressed
P2RY8	Xp22.33 and Yp11.2	6.55	7.18	1.36	1.43	-0.62	0.0146	0.141	Under-expressed
DIRAS3	1p31.3	3.77	4.62	1.83	1.94	-0.84	0.0147	0.141	Under-expressed
MPV17L	16p13.11	4.99	5.94	1.87	2.56	-0.95	0.0147	0.141	Under-expressed
MYOM2	8p23.3	2.8	3.78	1.95	2.61	-0.98	0.0147	0.141	Under-expressed
SOCS2	12q22	6.77	7.38	1.34	1.36	-0.61	0.0147	0.141	Under-expressed
SUMO3	21q22.3	11.83	11.58	0.57	0.5	0.25	0.0147	0.142	Over-expressed
HCFC1	Xq28	11.3	11.11	0.42	0.47	0.2	0.0148	0.142	Over-expressed
KCNMB4	12q15	5.15	5.85	1.62	1.37	-0.7	0.0148	0.142	Under-expressed
CDK2	12q13.2	10.05	9.76	0.64	0.63	0.29	0.0149	0.142	Over-expressed
FMR1	Xq27.3	10.5	10.24	0.58	0.58	0.26	0.0149	0.143	Over-expressed
TSPAN18	11p11.2	8.35	8.86	1.13	1.14	-0.51	0.015	0.143	Under-expressed
RPS2	16p13.3	13.62	14.02	0.91	0.87	-0.4	0.015	0.143	Under-expressed
MLKL	16q23.1	7.83	8.22	0.91	0.75	-0.39	0.015	0.143	Under-expressed
TMEM173	5q31.2	8.72	9.14	0.94	0.93	-0.42	0.015	0.143	Under-expressed
INCENP	11q12.3	9.53	9.18	0.74	0.83	0.35	0.015	0.143	Over-expressed
FAM200A	7q22.1	7.73	7.5	0.52	0.48	0.23	0.015	0.143	Over-expressed
ZNF695	1q44	7.37	6.77	1.32	1.39	0.61	0.015	0.143	Over-expressed
CCNB1	5q13.2	10.64	10.33	0.6	0.86	0.31	0.015	0.143	Over-expressed
UQCRC2	16p12.2	11.34	11.62	0.68	0.48	-0.28	0.0151	0.144	Under-expressed
CDCA4	14q32.33	9.47	9.17	0.61	0.79	0.3	0.0151	0.144	Over-expressed
TRIM17	1q42.13	5.59	4.67	2.07	1.99	0.92	0.0151	0.144	Over-expressed
FRMD6	14q22.1	9.37	9.85	1.14	0.92	-0.48	0.0151	0.144	Under-expressed
NRTN	19p13.3	5.57	4.67	1.94	2.15	0.9	0.0151	0.144	Over-expressed
ZSCAN12P1	6p22.1	5.63	5.08	1.2	1.29	0.55	0.0152	0.144	Over-expressed
CXCL2	4q13.3	4.59	5.38	1.72	1.77	-0.78	0.0152	0.144	Under-expressed
TEX30	13q33.1	8.29	7.93	0.78	0.85	0.36	0.0152	0.144	Over-expressed
CD37	19q13.33	8.15	8.74	1.29	1.41	-0.6	0.0153	0.144	Under-expressed
FANCE	6p21.31	8.1	7.72	0.83	0.91	0.39	0.0153	0.145	Over-expressed
RSL1D1	16p13.13	11.9	12.13	0.53	0.46	-0.23	0.0153	0.145	Under-expressed
DENND4B	1q21.3	10.23	10.01	0.52	0.45	0.22	0.0153	0.145	Over-expressed
ASF1B	19p13.12	9.67	9.3	0.78	0.91	0.37	0.0154	0.145	Over-expressed
PPP1R8	1p35.3	10.34	10.18	0.33	0.43	0.16	0.0154	0.145	Over-expressed
TTC28	22q12.1	7.78	8.26	1.08	1.02	-0.48	0.0154	0.145	Under-expressed
MAML3	4q31.1	7.05	7.59	1.27	1.05	-0.54	0.0154	0.145	Under-expressed
BCL2L13	22q11.21	10.1	10.32	0.53	0.42	-0.22	0.0155	0.146	Under-expressed
APH1A	1q21.2	12.93	12.68	0.58	0.56	0.26	0.0155	0.146	Over-expressed
PSMC3IP	17q21.2	7.27	6.87	0.9	0.9	0.4	0.0155	0.146	Over-expressed
ORC6	16q11.2	8.33	7.96	0.68	1.08	0.37	0.0156	0.146	Over-expressed
CDKN2D	19p13.2	8.28	7.89	0.85	0.94	0.39	0.0156	0.147	Over-expressed
NID1	1q42.3	10.45	10.94	1.09	1.1	-0.49	0.0156	0.147	Under-expressed
FBXL17	5q21.3	8.15	8.49	0.84	0.59	-0.35	0.0156	0.147	Under-expressed
BCL3	19q13.32	9.67	10.06	0.94	0.76	-0.4	0.0157	0.147	Under-expressed
CCDC142	2p13.1	7.65	7.39	0.55	0.64	0.26	0.0157	0.147	Over-expressed
TEX264	3p21.2	9.47	9.82	0.77	0.8	-0.35	0.0157	0.147	Under-expressed
ZFP36L1	14q24.1	12.44	12.78	0.81	0.62	-0.34	0.0157	0.147	Under-expressed
TBC1D10B	16p11.2	10.4	10.58	0.38	0.47	-0.18	0.0157	0.147	Under-expressed
HOXA3	7p15.2	4.76	5.76	2.4	1.8	-1	0.0157	0.147	Under-expressed
ZXDC	3q21.3	10.14	9.96	0.41	0.4	0.18	0.0157	0.147	Over-expressed
STOM	9q33.2	11.54	11.89	0.82	0.73	-0.35	0.0158	0.147	Under-expressed
GHR	5p13.1-p12	6.23	6.96	1.68	1.56	-0.73	0.0158	0.147	Under-expressed
POLD3	11q13.4	9.49	9.21	0.64	0.61	0.28	0.0158	0.147	Over-expressed
PRIM1	12q13.3	7.76	7.41	0.75	0.85	0.35	0.0158	0.147	Over-expressed
TPPP3	16q22.1	6.55	7.13	1.23	1.42	-0.58	0.0158	0.147	Under-expressed
CREB3L4	1q21.3	9.61	10	0.73	1.15	-0.39	0.0158	0.147	Under-expressed
NAV1	1q32.1	9.6	10.04	0.98	0.98	-0.44	0.0159	0.147	Under-expressed
ASNS	7q21.3	10.34	9.94	0.84	1	0.4	0.0159	0.147	Over-expressed
IMPA2	18p11.21	10.1	9.64	0.97	1.18	0.46	0.0159	0.147	Over-expressed
TMPRSS3	21q22.3	9.37	8.26	2.49	2.56	1.12	0.0159	0.147	Over-expressed
THUMPD2	2p22.1|2p22-p21	8.15	7.93	0.49	0.51	0.22	0.0159	0.147	Over-expressed
CPNE8	12q12	7.17	7.81	1.54	1.19	-0.64	0.0159	0.147	Under-expressed
NSMCE3	15q13.1	8.22	8.45	0.47	0.56	-0.22	0.016	0.147	Under-expressed
PRMT5	14q11.2	10.53	10.28	0.56	0.57	0.25	0.016	0.147	Over-expressed
OLFML2A	9q33.3	8.67	9.21	1.26	1.12	-0.54	0.016	0.147	Under-expressed
LYL1	19p13.13	5.55	5.99	0.82	1.29	-0.44	0.016	0.148	Under-expressed
PRPF4	9q32	9.96	9.71	0.59	0.51	0.25	0.016	0.148	Over-expressed
UTP14A	Xq26.1	9.6	9.37	0.5	0.52	0.22	0.016	0.148	Over-expressed
SCAI	9q33.3	8.16	7.81	0.84	0.69	0.35	0.0162	0.149	Over-expressed
NDUFV1	11q13.2	11.2	10.88	0.75	0.71	0.33	0.0162	0.149	Over-expressed
VPS18	15q15.1	9.09	9.31	0.44	0.62	-0.22	0.0162	0.149	Under-expressed
NICN1	3p21.31	7.49	7.75	0.55	0.63	-0.26	0.0162	0.149	Under-expressed
RBBP6	16p12.1	10.55	10.75	0.45	0.44	-0.2	0.0162	0.149	Under-expressed
SLC6A8	Xq28	10.72	10.32	0.82	1.09	0.4	0.0163	0.149	Over-expressed
DPYD	1p21.3	7.93	8.53	1.4	1.21	-0.6	0.0163	0.149	Under-expressed
LURAP1	1p34.1	2.93	3.49	1.32	1.15	-0.56	0.0163	0.15	Under-expressed
SPRY4	5q31.3	8.68	9.12	0.97	1.03	-0.44	0.0163	0.15	Under-expressed
ADO	10q21.3	9.57	9.32	0.59	0.51	0.25	0.0163	0.15	Over-expressed
ZNF180	19q13.31	7.77	7.46	0.71	0.67	0.31	0.0164	0.15	Over-expressed
SMC6	2p24.2	10.31	10.06	0.56	0.57	0.25	0.0164	0.15	Over-expressed
TCP10L	21q22.11	4.27	3.77	1.04	1.26	0.49	0.0164	0.15	Over-expressed
SUPT16H	14q11.2	11.87	11.64	0.54	0.45	0.23	0.0164	0.15	Over-expressed
RAB42	1p35.3	5.71	5.18	1.16	1.26	0.53	0.0164	0.15	Over-expressed
KCNE2	21q22.11	3.75	3.34	0.85	1.07	0.41	0.0165	0.15	Over-expressed
NTN4	12q22	8.42	9.13	1.61	1.57	-0.71	0.0165	0.15	Under-expressed
NXPH3	17q21.33	4.62	5.27	1.45	1.47	-0.65	0.0165	0.151	Under-expressed
ECE2	3q27.1	9.01	8.58	0.99	0.94	0.43	0.0166	0.151	Over-expressed
AIFM2	10q22.1	8.86	8.55	0.65	0.84	0.32	0.0166	0.151	Over-expressed
IFT140	16p13.3	8.54	8.84	0.65	0.77	-0.31	0.0166	0.151	Under-expressed
AKR1C3	10p15.1	7.5	8.41	2.16	1.78	-0.91	0.0166	0.151	Under-expressed
VRK1	14q32.2	8.91	8.65	0.55	0.69	0.26	0.0166	0.151	Over-expressed
TDRKH	1q21.3	9.4	9.04	0.71	1.03	0.36	0.0166	0.151	Over-expressed
MEOX1	17q21.31	4.93	5.76	1.71	2.19	-0.83	0.0167	0.151	Under-expressed
RAC2	22q13.1	9.15	9.75	1.36	1.33	-0.6	0.0167	0.151	Under-expressed
UBL3	13q12.3	9.52	9.83	0.67	0.77	-0.31	0.0167	0.151	Under-expressed
ZFP30	19q13.12	8.18	7.79	0.88	0.9	0.39	0.0167	0.151	Over-expressed
GULP1	2q32.1-q32.2	6.06	6.81	1.82	1.36	-0.75	0.0167	0.151	Under-expressed
ARPC3	12q24.11	11.83	12.02	0.36	0.57	-0.19	0.0167	0.151	Under-expressed
POT1	7q31.33	9.3	9.05	0.55	0.64	0.26	0.0167	0.151	Over-expressed
LYVE1	11p15.4	4.72	5.44	1.68	1.51	-0.72	0.0167	0.151	Under-expressed
COX7A1	19q13.12	5.18	5.79	1.4	1.38	-0.62	0.0168	0.151	Under-expressed
TPCN1	12q24.13	9.27	9.56	0.62	0.73	-0.29	0.0168	0.151	Under-expressed
FRG1	4q35.2	9.03	9.25	0.47	0.53	-0.22	0.0168	0.151	Under-expressed
TRMT10C	3q12.3	9.64	9.41	0.47	0.59	0.23	0.0168	0.151	Over-expressed
TGM1	14q12	5.81	4.95	1.94	2	0.86	0.0168	0.151	Over-expressed
SMIM29	6p21.31	8.18	8.49	0.66	0.78	-0.31	0.0168	0.151	Under-expressed
ERMN	2q24.1	3.76	4.37	1.24	1.65	-0.61	0.0168	0.151	Under-expressed
SYN1	Xp11.3-p11.23	5.08	4.44	1.51	1.26	0.64	0.0168	0.151	Over-expressed
TAOK2	16p11.2	10	10.22	0.47	0.51	-0.22	0.0169	0.151	Under-expressed
NDUFAB1	16p12.2	9.93	10.18	0.59	0.52	-0.25	0.0169	0.151	Under-expressed
KCTD10	12q24.11	10.42	10.61	0.43	0.41	-0.19	0.0169	0.152	Under-expressed
PIGL	17p11.2	5.38	5.73	0.82	0.74	-0.35	0.017	0.152	Under-expressed
KCNQ1	11p15.5-p15.4	6.8	7.33	1.16	1.28	-0.53	0.017	0.152	Under-expressed
PPP3CA	4q24	10.07	10.38	0.71	0.7	-0.31	0.017	0.152	Under-expressed
TNKS1BP1	11q12.1	11.91	12.17	0.6	0.63	-0.27	0.0171	0.152	Under-expressed
DNAJC17	15q15.1	7.24	7.56	0.67	0.81	-0.32	0.0171	0.152	Under-expressed
PWP2	21q22.3	10.25	9.97	0.61	0.69	0.28	0.0171	0.152	Over-expressed
DARS2	1q25.1	9.98	9.65	0.71	0.79	0.32	0.0171	0.152	Over-expressed
BAIAP2L1	7q21.3-q22.1	10.39	10.14	0.46	0.73	0.25	0.0171	0.152	Over-expressed
APRT	16q24.3	10.52	10.86	0.73	0.87	-0.34	0.0171	0.152	Under-expressed
NEXN	1p31.1	7.24	7.73	1.14	1.03	-0.49	0.0172	0.153	Under-expressed
GMEB1	1p35.3	7.78	7.55	0.53	0.53	0.23	0.0172	0.153	Over-expressed
HENMT1	1p13.3	9.29	8.96	0.75	0.75	0.33	0.0172	0.153	Over-expressed
NUP133	1q42.13	10.78	10.53	0.54	0.6	0.25	0.0172	0.153	Over-expressed
NQO1	16q22.1	9.84	10.53	1.53	1.66	-0.69	0.0173	0.153	Under-expressed
VPS39	15q15.1	10.06	10.25	0.39	0.49	-0.19	0.0173	0.153	Under-expressed
ERCC2	19q13.32	8.7	8.45	0.58	0.6	0.26	0.0173	0.153	Over-expressed
SLC25A15	13q14.11	9	8.68	0.76	0.63	0.32	0.0173	0.153	Over-expressed
PFAS	17p13.1	8.77	8.51	0.62	0.6	0.27	0.0173	0.153	Over-expressed
TANGO6	16q22.1	7.56	7.85	0.66	0.63	-0.29	0.0173	0.153	Under-expressed
SGO2	2q33.1	8.76	8.43	0.7	0.84	0.33	0.0173	0.153	Over-expressed
PDLIM3	4q35.1	8.62	9.22	1.36	1.36	-0.6	0.0173	0.153	Under-expressed
FANCI	15q26.1	10.53	10.18	0.8	0.8	0.35	0.0173	0.153	Over-expressed
ZNF496	1q44	8.68	8.35	0.73	0.79	0.33	0.0173	0.153	Over-expressed
DUSP10	1q41	7.77	8.28	1.17	1.18	-0.51	0.0173	0.153	Under-expressed
GOLGA2P7	15q25.2	8.86	8.47	0.85	1.01	0.4	0.0174	0.153	Over-expressed
SLC5A3	21q22.11	9.98	9.57	0.93	0.93	0.41	0.0174	0.153	Over-expressed
HECW2	2q32.3	7.22	7.7	1.15	0.92	-0.48	0.0174	0.153	Under-expressed
KDR	4q12	9.06	9.49	1.02	0.91	-0.43	0.0174	0.153	Under-expressed
MTCH1	6p21.2	12.31	12.05	0.56	0.61	0.25	0.0175	0.153	Over-expressed
MAP1LC3B2	12q24.22	7.79	8.03	0.55	0.55	-0.24	0.0175	0.153	Under-expressed
TNIK	3q26.2-q26.31	6.6	7.3	1.65	1.43	-0.7	0.0175	0.154	Under-expressed
CEP112	17q24.1	5.92	6.42	1.19	1.04	-0.5	0.0175	0.154	Under-expressed
TAGLN	11q23.3	12.12	12.78	1.54	1.43	-0.66	0.0176	0.154	Under-expressed
PPARA	22q13.31	9.31	8.96	0.8	0.82	0.35	0.0176	0.154	Over-expressed
RGN	Xp11.3	5.33	4.3	2.44	2.08	1.03	0.0176	0.154	Over-expressed
FBXL5	4p15.32	10.32	10.56	0.55	0.51	-0.24	0.0176	0.154	Under-expressed
GIMAP1	7q36.1	6	6.55	1.22	1.35	-0.55	0.0177	0.154	Under-expressed
THAP1	8p11.21	8.02	7.8	0.5	0.55	0.22	0.0177	0.154	Over-expressed
PGP	16p13.3	8.42	8.76	0.76	0.8	-0.34	0.0177	0.154	Under-expressed
TMEM18	2p25.3	9.32	9.05	0.62	0.65	0.28	0.0177	0.154	Over-expressed
ATF7	12q13.13	10.06	10.31	0.58	0.5	-0.24	0.0177	0.154	Under-expressed
CLK2	1q22	10	9.77	0.51	0.57	0.23	0.0177	0.155	Over-expressed
GIMAP5	7q36.1	7.76	8.32	1.28	1.32	-0.57	0.0178	0.155	Under-expressed
CD52	1p36.11	7.84	8.56	1.64	1.62	-0.72	0.0178	0.155	Under-expressed
ATP6V0E2-AS1	7q36.1	5.72	5.21	1.16	1.17	0.51	0.0178	0.155	Over-expressed
ABCB10	1q42.13	9.27	8.97	0.68	0.67	0.3	0.0178	0.155	Over-expressed
SERPING1	11q12.1	12.12	12.56	1.02	0.98	-0.44	0.0178	0.155	Under-expressed
ZNF550	19q13.43	7.81	7.47	0.77	0.72	0.33	0.0178	0.155	Over-expressed
COL5A3	19p13.2	8.66	9.25	1.36	1.35	-0.59	0.0178	0.155	Under-expressed
CDKAL1	6p22.3	9.16	8.73	1.03	0.9	0.43	0.0179	0.155	Over-expressed
GLTP	12q24.11	9.99	10.23	0.52	0.57	-0.24	0.0179	0.155	Under-expressed
MAP3K21	1q42.2	8.82	8.26	1.25	1.32	0.56	0.0179	0.155	Over-expressed
PLCH2	1p36.32	5.27	6.02	1.53	2.07	-0.75	0.0179	0.155	Under-expressed
DGLUCY	14q32.11	8.43	8.81	0.88	0.89	-0.39	0.0179	0.155	Under-expressed
F10	13q34	3.21	3.88	1.42	1.69	-0.66	0.0179	0.155	Under-expressed
CRYBG3	3q11.2	7.38	8.01	1.53	1.13	-0.62	0.018	0.155	Under-expressed
GPR155	2q31.1	6.96	7.4	1.04	0.98	-0.45	0.018	0.156	Under-expressed
DDO	6q21	3.99	4.52	1.19	1.23	-0.52	0.0181	0.156	Under-expressed
IGFBP6	12q13.13	6.23	6.76	1.03	1.55	-0.53	0.0181	0.156	Under-expressed
CDCA3	12p13.31	9.16	8.73	0.9	1.14	0.43	0.0182	0.157	Over-expressed
ZNF71	19q13.43	8.06	7.79	0.59	0.66	0.27	0.0182	0.157	Over-expressed
HES6	2q37.3	7.46	6.88	1.3	1.41	0.58	0.0182	0.157	Over-expressed
HSPB1P1	9q21.13	7.03	7.6	1.18	1.55	-0.57	0.0182	0.157	Under-expressed
KHDC4	1q22	10.33	10.07	0.55	0.69	0.26	0.0182	0.157	Over-expressed
TAF5L	1q42.13	10.07	9.83	0.56	0.53	0.24	0.0182	0.157	Over-expressed
TATDN1	8q24.13	9.4	9.07	0.76	0.72	0.33	0.0183	0.157	Over-expressed
PAX8-AS1	2q14.1	5.27	6.12	1.88	2.1	-0.85	0.0183	0.157	Under-expressed
PSMD8	19q13.2	11.9	11.65	0.58	0.55	0.25	0.0183	0.157	Over-expressed
SYNPO	5q33.1	10.22	10.56	0.81	0.74	-0.34	0.0184	0.158	Under-expressed
ENO2	12p13.31	9.34	8.75	1.39	1.29	0.59	0.0184	0.158	Over-expressed
HPDL	1p34.1	6.95	6.2	1.58	2.02	0.75	0.0184	0.158	Over-expressed
GNAI3	1p13.3	11.54	11.33	0.48	0.49	0.21	0.0184	0.158	Over-expressed
PKD1	16p13.3	10.01	10.31	0.65	0.76	-0.3	0.0185	0.158	Under-expressed
DIAPH3	13q21.2	8.52	8.07	0.95	1.22	0.45	0.0185	0.158	Over-expressed
POU2F2	19q13.2	6.5	7.01	1.13	1.27	-0.51	0.0185	0.158	Under-expressed
PIGZ	3q29	7.1	6.61	1.18	0.97	0.49	0.0185	0.158	Over-expressed
COL27A1	9q32	8.8	8.08	1.68	1.59	0.72	0.0186	0.158	Over-expressed
FN3K	17q25.3	8.58	8.19	0.84	1.01	0.39	0.0187	0.159	Over-expressed
TTL	2q14.1	10.15	9.84	0.77	0.56	0.31	0.0187	0.159	Over-expressed
SLC6A1	3p25.3	3.28	3.9	1.5	1.28	-0.62	0.0187	0.159	Under-expressed
PLD4	14q32.33	4.78	5.68	2.01	2.25	-0.91	0.0187	0.159	Under-expressed
PLPP3	1p32.2	9.77	10.16	0.88	0.95	-0.39	0.0187	0.159	Under-expressed
DCUN1D5	11q22.3	9.4	9.1	0.67	0.73	0.3	0.0187	0.159	Over-expressed
CKS2	9q22.2	10.12	9.76	0.76	0.97	0.36	0.0188	0.159	Over-expressed
TMCC2	1q32.1	7.8	7.12	1.51	1.73	0.69	0.0188	0.159	Over-expressed
CCRL2	3p21.31	5.55	6	1.08	0.95	-0.45	0.0188	0.16	Under-expressed
FGF1	5q31.3	6.86	7.4	1.2	1.32	-0.54	0.0188	0.16	Under-expressed
NR3C1	5q31.3	9.61	9.99	0.92	0.79	-0.38	0.0188	0.16	Under-expressed
TMEM186	16p13.2	8.03	8.29	0.65	0.51	-0.26	0.0189	0.16	Under-expressed
ANG	14q11.2	6.88	7.34	1.05	1.09	-0.46	0.0189	0.16	Under-expressed
CKAP5	11p11.2	12.16	11.84	0.76	0.69	0.32	0.0189	0.16	Over-expressed
SF3B6	2p23.3	11.11	10.82	0.65	0.67	0.28	0.019	0.161	Over-expressed
HLX	1q41	6.56	6.99	0.94	1.12	-0.43	0.019	0.161	Under-expressed
LINC00341	14q32.13	5.9	6.4	1.22	1.05	-0.51	0.019	0.161	Under-expressed
MVB12B	9q33.3	8.31	7.96	0.79	0.85	0.35	0.019	0.161	Over-expressed
PAQR5	15q23	7.37	6.78	1.28	1.52	0.59	0.0191	0.161	Over-expressed
EPCAM	2p21	12.99	12.51	0.81	1.55	0.47	0.0191	0.161	Over-expressed
CYYR1	21q21.3	8.27	8.88	1.43	1.34	-0.61	0.0191	0.161	Under-expressed
REM1	20q11.21	4.27	4.9	1.34	1.73	-0.64	0.0191	0.161	Under-expressed
TRIM36	5q22.3	5.6	6.32	1.72	1.53	-0.72	0.0192	0.162	Under-expressed
PCNA	20p12.3	11.8	11.53	0.63	0.65	0.27	0.0193	0.162	Over-expressed
ZNF165	6p22.1	7.31	6.88	0.83	1.27	0.43	0.0193	0.162	Over-expressed
YWHAQ	2p25.1	13.38	13.14	0.56	0.59	0.24	0.0193	0.162	Over-expressed
ZNF551	19q13.43	7.11	6.67	0.98	1.08	0.44	0.0193	0.162	Over-expressed
CCDC102B	18q22.1-q22.2	5.78	6.16	0.9	0.82	-0.38	0.0193	0.162	Under-expressed
TCEAL7	Xq22.2	3.4	4.02	1.42	1.45	-0.62	0.0193	0.162	Under-expressed
PARP2	14q11.2	9.08	8.85	0.53	0.58	0.24	0.0193	0.162	Over-expressed
TMEM133	11q22.1	5.69	6.11	1.03	0.78	-0.42	0.0193	0.162	Under-expressed
SKAP2	7p15.2	8.75	9.27	1.27	1.02	-0.52	0.0193	0.162	Under-expressed
TNFRSF1A	12p13.31	11.08	11.33	0.6	0.51	-0.25	0.0194	0.162	Under-expressed
RBCK1	20p13	10.09	10.42	0.81	0.7	-0.34	0.0194	0.162	Under-expressed
HOXD1	2q31.1	2.67	3.48	2.01	1.53	-0.81	0.0194	0.162	Under-expressed
DGCR11	22q11.21	4.76	5.09	0.75	0.8	-0.33	0.0194	0.162	Under-expressed
TMEM26	10q21.2	4.83	5.31	1.08	1.23	-0.49	0.0194	0.162	Under-expressed
CYB5D2	17p13.2	7.51	7.85	0.82	0.76	-0.35	0.0195	0.162	Under-expressed
MRPL40	22q11.21	8.99	9.25	0.57	0.68	-0.26	0.0195	0.163	Under-expressed
MLST8	16p13.3	9.61	9.9	0.71	0.58	-0.29	0.0196	0.163	Under-expressed
CPNE5	6p21.2	6.21	6.84	1.46	1.47	-0.63	0.0196	0.163	Under-expressed
USP36	17q25.3	10.66	10.41	0.59	0.52	0.25	0.0196	0.163	Over-expressed
HLA-E	6p22.1	12.7	13.08	0.87	0.92	-0.38	0.0196	0.163	Under-expressed
NOD1	7p14.3	8.2	8.46	0.63	0.51	-0.25	0.0197	0.163	Under-expressed
AHNAK	11q12.3	13.5	13.95	1.01	1.12	-0.45	0.0197	0.164	Under-expressed
SNX18	5q11.2	9.23	9.54	0.72	0.69	-0.3	0.0197	0.164	Under-expressed
COMMD10	5q23.1	7.88	8.14	0.63	0.5	-0.26	0.0198	0.164	Under-expressed
SNX33	15q24.2	9.17	9.43	0.62	0.56	-0.26	0.0198	0.164	Under-expressed
LMAN2	5q35.3	11.31	11.6	0.66	0.72	-0.29	0.0198	0.164	Under-expressed
HEG1	3q21.2	10	10.47	1.13	1	-0.47	0.0199	0.164	Under-expressed
KYNU	2q22.2	7.37	8.19	1.94	1.87	-0.83	0.0199	0.164	Under-expressed
R3HDM4	19p13.3	10.32	10.64	0.76	0.69	-0.32	0.0199	0.164	Under-expressed
MECR	1p35.3	8.93	8.64	0.65	0.72	0.29	0.0199	0.164	Over-expressed
ZNF567	19q13.12	7.74	7.4	0.77	0.83	0.34	0.0199	0.164	Over-expressed
STAT4	2q32.2-q32.3	5.38	6.1	1.76	1.44	-0.72	0.0199	0.164	Under-expressed
RASGRP4	19q13.2	3.91	4.46	1.34	1.13	-0.55	0.02	0.164	Under-expressed
DNAH2	17p13.1	6.22	5.23	2.34	2.28	1	0.02	0.164	Over-expressed
TMEM219	16p11.2	10.61	10.87	0.63	0.57	-0.26	0.02	0.164	Under-expressed
FLT3LG	19q13.33	5.96	6.47	1.15	1.24	-0.51	0.02	0.164	Under-expressed
DPYSL3	5q32	11.16	11.68	1.31	0.98	-0.52	0.02	0.164	Under-expressed
TGFB1	19q13.2	9.36	9.71	0.7	0.99	-0.35	0.02	0.165	Under-expressed
SLC16A8	22q13.1	3.58	2.76	1.95	1.8	0.82	0.02	0.165	Over-expressed
SEC62	3q26.2	11.43	11.66	0.54	0.51	-0.23	0.0201	0.165	Under-expressed
COL4A1	13q34	12.83	13.21	0.87	0.92	-0.38	0.0201	0.165	Under-expressed
ZNF525	19q13.42	8.4	8.07	0.8	0.66	0.33	0.0201	0.165	Over-expressed
MRVI1	11p15.4	7.37	7.94	1.39	1.19	-0.57	0.0202	0.165	Under-expressed
HPRT1	Xq26.2-q26.3	10.14	9.89	0.49	0.74	0.25	0.0202	0.165	Over-expressed
SLC9A9	3q24	6.41	6.87	1.09	0.98	-0.45	0.0202	0.165	Under-expressed
BCAR1	16q23.1	9.87	10.17	0.66	0.76	-0.3	0.0202	0.165	Under-expressed
HP1BP3	1p36.12	11.9	11.68	0.53	0.42	0.21	0.0202	0.165	Over-expressed
PPM1G	2p23.3	12.07	11.87	0.41	0.56	0.2	0.0202	0.165	Over-expressed
WAC	10p12.1|10p12.1-p11.2	11.95	11.72	0.51	0.56	0.22	0.0202	0.165	Over-expressed
PGAM5	12q24.33	9.38	9.11	0.61	0.64	0.27	0.0203	0.165	Over-expressed
TRIM6	11p15.4	5.87	6.57	1.77	1.27	-0.7	0.0203	0.165	Under-expressed
CALHM5	6q22.1	6	6.57	1.43	1.09	-0.57	0.0203	0.166	Under-expressed
EMP3	19q13.33	8.76	9.1	0.76	0.93	-0.35	0.0203	0.166	Under-expressed
RCC1	1p35.3	10.66	10.36	0.63	0.83	0.3	0.0204	0.166	Over-expressed
B4GALNT4	11p15.5	9	8.45	1.3	1.24	0.55	0.0204	0.166	Over-expressed
SCN4B	11q23.3	5.56	6.23	1.6	1.49	-0.67	0.0205	0.166	Under-expressed
TCF4	18q21.2	9.55	10.04	1.21	0.98	-0.49	0.0205	0.166	Under-expressed
EIF2B5	3q27.1	10.49	10.31	0.4	0.43	0.18	0.0205	0.167	Over-expressed
VSIR	10q22.1	8.99	9.42	0.99	1.01	-0.43	0.0205	0.167	Under-expressed
ARID3A	19p13.3	5.64	6.11	1.18	0.88	-0.47	0.0205	0.167	Under-expressed
GK5	3q23	9.49	9.17	0.74	0.71	0.31	0.0206	0.167	Over-expressed
CD22	19q13.12	5.24	6.13	1.97	2.3	-0.89	0.0206	0.167	Under-expressed
ZMYM1	1p34.3	8.38	8.11	0.64	0.64	0.27	0.0207	0.167	Over-expressed
SEC22C	3p22.1	8.8	9	0.46	0.48	-0.2	0.0207	0.167	Under-expressed
2009-03-01	12q14.1	7.8	8.13	0.79	0.72	-0.33	0.0207	0.167	Under-expressed
SVIP	11p14.3	8.76	8.42	0.67	0.99	0.33	0.0207	0.167	Over-expressed
RBMS3	3p24.1	3.75	4.47	1.77	1.43	-0.72	0.0208	0.168	Under-expressed
RGS14	5q35.3	7.91	8.28	0.82	0.94	-0.37	0.0208	0.168	Under-expressed
DDX1	2p24.3	11.57	11.39	0.41	0.45	0.18	0.0208	0.168	Over-expressed
NT5C3B	17q21.2	9.55	9.21	0.65	1.06	0.34	0.0208	0.168	Over-expressed
LRIG1	3p14.1	10.21	10.57	0.84	0.86	-0.36	0.021	0.169	Under-expressed
MARCKSL1	1p35.1	13.3	13	0.63	0.84	0.3	0.021	0.169	Over-expressed
CENPE	4q24	9.46	9.06	0.85	1.14	0.4	0.021	0.169	Over-expressed
CHRD	3q27.1	5.36	5.95	1.37	1.46	-0.6	0.0211	0.169	Under-expressed
TSR1	17p13.3	10.61	10.4	0.49	0.5	0.21	0.0211	0.169	Over-expressed
MAST4	5q12.3	6.9	7.57	1.67	1.32	-0.67	0.0211	0.169	Under-expressed
TRIM62	1p35.1	7.38	7.7	0.74	0.78	-0.32	0.0211	0.169	Under-expressed
CCR6	6q27	5.31	5.89	1.3	1.5	-0.58	0.0211	0.169	Under-expressed
ADAMTS4	1q23.3	9.28	9.8	1.21	1.23	-0.52	0.0211	0.169	Under-expressed
CLNS1A	11q14.1	11.09	10.81	0.61	0.72	0.28	0.0211	0.169	Over-expressed
LINC00909	18q22.3	7.6	7.28	0.76	0.7	0.32	0.0211	0.169	Over-expressed
PNMA3	Xq28	5.7	4.8	2.07	2.2	0.9	0.0212	0.169	Over-expressed
CASP7	10q25.3	9.05	9.36	0.72	0.75	-0.31	0.0212	0.169	Under-expressed
LRRC37B	17q11.2	7.22	6.95	0.63	0.65	0.27	0.0212	0.169	Over-expressed
PPIL2	22q11.21	9.83	10.02	0.46	0.46	-0.2	0.0212	0.169	Under-expressed
MMP12	11q22.2	7.57	6.47	2.46	2.85	1.1	0.0212	0.17	Over-expressed
HNRNPH3	10q21.3	11.34	11.16	0.45	0.39	0.18	0.0213	0.17	Over-expressed
LRRC8D	1p22.2	10.54	10.23	0.66	0.9	0.32	0.0213	0.17	Over-expressed
SUMF1	3p26.1	9.46	9.76	0.7	0.71	-0.3	0.0213	0.17	Under-expressed
GLMN	1p22.1	7.67	7.4	0.61	0.66	0.27	0.0214	0.17	Over-expressed
SGSH	17q25.3	9.22	9.45	0.49	0.67	-0.23	0.0214	0.17	Under-expressed
CCDC114	19q13.33	3.93	3.32	1.43	1.47	0.61	0.0214	0.17	Over-expressed
FBXO17	19q13.2	8.09	7.45	1.51	1.53	0.64	0.0214	0.17	Over-expressed
SLC45A4	8q24.3	9.21	8.88	0.81	0.76	0.34	0.0214	0.17	Over-expressed
TFB2M	1q44	9.31	9.02	0.68	0.69	0.29	0.0214	0.17	Over-expressed
MYBL2	20q13.12	11.2	10.75	0.89	1.37	0.45	0.0214	0.17	Over-expressed
CCHCR1	6p21.33	9.57	9.19	0.92	0.87	0.38	0.0215	0.17	Over-expressed
NAMPT	7q22.3	11.04	11.36	0.64	0.99	-0.33	0.0215	0.17	Under-expressed
RIC8B	12q23.3	8.5	8.23	0.68	0.55	0.27	0.0215	0.17	Over-expressed
ATF7IP2	16p13.2-p13.13	6.14	6.8	1.71	1.17	-0.66	0.0215	0.17	Under-expressed
WDHD1	14q22.2-q22.3	8.72	8.37	0.75	0.96	0.35	0.0215	0.171	Over-expressed
MAP1A	15q15.3	7.74	8.2	1.1	1.04	-0.46	0.0216	0.171	Under-expressed
LEF1	4q25	7.49	8.01	1.31	1.05	-0.52	0.0216	0.171	Under-expressed
TMEM175	4p16.3	7.82	8.13	0.69	0.81	-0.31	0.0216	0.171	Under-expressed
TIAF1	17q11.2	8.28	8.67	0.91	1	-0.4	0.0216	0.171	Under-expressed
ZFPM2	8q23.1	5.35	6.07	1.82	1.36	-0.72	0.0217	0.171	Under-expressed
ATAD3A	1p36.33	10	9.67	0.72	0.95	0.34	0.0217	0.171	Over-expressed
SMS	Xp22.11	11.51	11.25	0.57	0.72	0.26	0.0217	0.172	Over-expressed
NEK8	17q11.2	5.75	6.07	0.72	0.81	-0.32	0.0217	0.172	Under-expressed
SREK1IP1	5q12.3	8.56	8.79	0.52	0.58	-0.23	0.0218	0.172	Under-expressed
PSAT1	9q21.2	10.08	9.46	1.35	1.73	0.62	0.0218	0.172	Over-expressed
SELL	1q24.2	7.62	8.41	1.86	1.9	-0.79	0.0218	0.172	Under-expressed
PDE4D	5q11.2-q12.1	7.13	7.76	1.61	1.19	-0.63	0.0218	0.172	Under-expressed
HDAC2	6q21	12.03	11.74	0.6	0.85	0.29	0.0219	0.172	Over-expressed
KRT10	17q21.2	8.39	8.78	0.78	1.14	-0.38	0.022	0.173	Under-expressed
ZNF500	16p13.3	7.49	7.71	0.5	0.59	-0.22	0.022	0.173	Under-expressed
ZNF543	19q13.43	7.09	6.8	0.67	0.68	0.29	0.022	0.173	Over-expressed
SRP14P1	12p13.31	1.73	2.12	0.9	0.97	-0.39	0.022	0.173	Under-expressed
PELO	5q11.2	8.49	8.74	0.62	0.52	-0.25	0.022	0.173	Under-expressed
IRAK4	12q12	8.5	8.75	0.58	0.57	-0.24	0.022	0.173	Under-expressed
HHEX	10q23.33	6.19	6.59	0.91	1.01	-0.4	0.0221	0.173	Under-expressed
RND2	17q21.31	6.07	5.09	2.31	2.32	0.98	0.0222	0.173	Over-expressed
EPB41L4A	5q22.1-q22.2	7.38	7.88	1.16	1.21	-0.5	0.0222	0.173	Under-expressed
MMAA	4q31.21	7.63	7.87	0.57	0.59	-0.24	0.0222	0.173	Under-expressed
ELMOD2	4q31.1	7.17	7.47	0.74	0.62	-0.3	0.0222	0.173	Under-expressed
TMEM38A	19p13.11	7.07	6.56	1.1	1.45	0.51	0.0222	0.173	Over-expressed
MYL12A	18p11.31	12.65	12.9	0.64	0.53	-0.26	0.0222	0.173	Under-expressed
NPR1	1q21.3	6.49	7.02	1.25	1.25	-0.53	0.0222	0.173	Under-expressed
LINC01106	2q13	5.76	5.28	1.12	1.17	0.48	0.0222	0.173	Over-expressed
TSR3	16p13.3	9.35	9.69	0.83	0.75	-0.34	0.0223	0.173	Under-expressed
ABHD14A	3p21.2	7.1	7.5	0.94	0.96	-0.4	0.0223	0.173	Under-expressed
SPTBN2	11q13.2	10.79	10.4	0.91	0.98	0.39	0.0223	0.173	Over-expressed
GAMT	19p13.3	6.14	6.87	1.66	1.91	-0.73	0.0223	0.173	Under-expressed
FBXO5	6q25.2	8.58	8.21	0.87	0.94	0.37	0.0223	0.173	Over-expressed
KLHL3	5q31.2	5.84	6.2	0.85	0.87	-0.36	0.0223	0.173	Under-expressed
HNRNPM	19p13.2	12.31	12.14	0.4	0.44	0.17	0.0225	0.175	Over-expressed
C18ORF25	18q21.1	9.45	9.23	0.49	0.57	0.22	0.0225	0.175	Over-expressed
SLC39A11	17q24.3-q25.1	9.69	10	0.7	0.83	-0.31	0.0226	0.175	Under-expressed
WDFY2	13q14.3	7.69	7.93	0.54	0.65	-0.24	0.0226	0.175	Under-expressed
CIART	1q21.2	7.99	7.38	1.38	1.57	0.61	0.0226	0.175	Over-expressed
LYRM9	17q11.2	6.47	6.83	0.85	0.85	-0.36	0.0226	0.175	Under-expressed
SLC25A20	3p21.31	7.83	8.1	0.67	0.63	-0.28	0.0227	0.175	Under-expressed
KLHL2	4q32.3	7.98	8.39	1.01	0.9	-0.41	0.0227	0.175	Under-expressed
TRIM28	19q13.43	12.7	12.45	0.58	0.61	0.25	0.0227	0.175	Over-expressed
UBE2MP1	16p11.2	6.6	6.37	0.54	0.62	0.24	0.0227	0.176	Over-expressed
BGN	Xq28	13.21	13.68	1.05	1.24	-0.47	0.0227	0.176	Under-expressed
SSBP2	5q14.1	7.78	8.13	0.86	0.85	-0.36	0.0228	0.176	Under-expressed
POLL	10q24.32	8.65	8.38	0.61	0.7	0.27	0.0228	0.176	Over-expressed
CELF1	11p11.2	11.09	10.86	0.57	0.47	0.23	0.0229	0.176	Over-expressed
ARHGAP23	17q12	8.59	8.96	0.91	0.89	-0.38	0.0229	0.177	Under-expressed
PDCD7	15q22.31	9.17	8.95	0.53	0.49	0.22	0.0229	0.177	Over-expressed
TAL1	1p33	4.51	5.15	1.61	1.23	-0.63	0.023	0.177	Under-expressed
ABHD15	17q11.2	7.61	7.94	0.82	0.71	-0.33	0.023	0.177	Under-expressed
MIS18A	21q22.11	8.85	8.57	0.66	0.71	0.28	0.023	0.177	Over-expressed
ENPEP	4q25	6.92	7.46	1.32	1.19	-0.54	0.023	0.177	Under-expressed
ARHGAP10	4q31.23	7.89	8.31	1.04	0.91	-0.42	0.023	0.177	Under-expressed
SRRT	7q22.1	11.2	10.99	0.53	0.46	0.21	0.0231	0.177	Over-expressed
NUDT12	5q21.2	6.65	7.31	1.74	1.11	-0.66	0.0231	0.177	Under-expressed
SMYD4	17p13.3	8.03	7.83	0.49	0.42	0.2	0.0231	0.177	Over-expressed
CCNG2	4q21.1	9.92	10.23	0.71	0.74	-0.3	0.0231	0.177	Under-expressed
APOL2	22q12.3	9.43	9.82	0.94	0.87	-0.38	0.0231	0.177	Under-expressed
SNRPD1	18q11.2	10.46	10.22	0.55	0.6	0.24	0.0231	0.177	Over-expressed
AMDHD2	16p13.3	7.35	7.74	0.91	0.92	-0.38	0.0232	0.177	Under-expressed
ARHGAP15	2q22.2-q22.3	5.87	6.44	1.34	1.37	-0.57	0.0232	0.177	Under-expressed
RECQL4	8q24.3	9.53	9.12	0.88	1.17	0.41	0.0232	0.177	Over-expressed
TAF5	10q24.33	7.57	7.32	0.57	0.69	0.26	0.0233	0.178	Over-expressed
ZNF420	19q13.12	7.46	7.09	0.86	0.97	0.38	0.0233	0.178	Over-expressed
BMS1P2	10q11.22	6.21	5.85	0.86	0.87	0.36	0.0233	0.178	Over-expressed
F3	1p21.3	7.71	8.3	1.29	1.59	-0.58	0.0233	0.178	Under-expressed
SMC2	9q31.1	10.04	9.68	0.83	0.89	0.36	0.0234	0.178	Over-expressed
SMPD1	11p15.4	8.92	9.23	0.74	0.79	-0.32	0.0234	0.178	Under-expressed
RAB24	5q35.3	8.34	8.69	0.79	0.96	-0.35	0.0234	0.178	Under-expressed
CNTLN	9p22.2	8.03	7.54	1.23	1	0.49	0.0234	0.178	Over-expressed
OSBPL10	3p23	8.38	8.81	1.08	0.89	-0.43	0.0234	0.178	Under-expressed
ZNF575	19q13.31	4.84	5.16	0.74	0.79	-0.32	0.0234	0.178	Under-expressed
GLI3	7p14.1	8.21	8.84	1.65	1.08	-0.63	0.0234	0.178	Under-expressed
SDF2	17q11.2	9.4	9.59	0.45	0.51	-0.19	0.0234	0.178	Under-expressed
SPAG5	17q11.2	10	9.69	0.56	1	0.3	0.0235	0.178	Over-expressed
GTF2H4	6p21.33	9.26	9.04	0.49	0.56	0.21	0.0235	0.178	Over-expressed
NOL10	2p25.1	10.23	10.02	0.46	0.54	0.2	0.0235	0.178	Over-expressed
TIMELESS	12q13.3	10.16	9.88	0.69	0.68	0.29	0.0235	0.178	Over-expressed
RINL	19q13.2	7.77	7.35	0.98	1.03	0.42	0.0235	0.178	Over-expressed
PARD6B	20q13.13	7.85	7.51	0.64	1.08	0.34	0.0236	0.178	Over-expressed
MRPL3	3q22.1	11.39	11.18	0.43	0.63	0.21	0.0236	0.178	Over-expressed
SMPD4	2q21.1	11.3	11.07	0.57	0.44	0.22	0.0236	0.179	Over-expressed
CROT	7q21.12	7.47	7.93	0.98	1.35	-0.46	0.0237	0.179	Under-expressed
LBR	1q42.12	10.84	10.55	0.66	0.73	0.29	0.0237	0.179	Over-expressed
SETD7	4q31.1	10.42	10.76	0.85	0.77	-0.34	0.0237	0.179	Under-expressed
IL16	15q25.1	8.14	8.66	1.23	1.32	-0.52	0.0237	0.179	Under-expressed
ZDHHC8P1	22q11.23	5.5	4.9	1.44	1.45	0.6	0.0238	0.179	Over-expressed
RFC2	7q11.23	10.21	9.95	0.6	0.68	0.26	0.0239	0.18	Over-expressed
ACOX3	4p16.1	8.57	8.92	0.9	0.69	-0.35	0.024	0.18	Under-expressed
FBXO36	2q36.3	5.63	6.01	0.93	0.86	-0.38	0.024	0.181	Under-expressed
GPN1	2p23.3	10.39	10.21	0.4	0.5	0.18	0.024	0.181	Over-expressed
SEPTIN1	16p11.2	6.42	7.04	1.45	1.58	-0.62	0.024	0.181	Under-expressed
CPEB2	4p15.32	7.89	8.31	1.02	0.95	-0.42	0.024	0.181	Under-expressed
UHRF1	19p13.3	9.28	8.88	0.88	1.12	0.4	0.0241	0.181	Over-expressed
ADAMTS6	5q12.3	4.83	5.27	1.06	1.01	-0.44	0.0242	0.181	Under-expressed
PTPRN2	7q36.3	5.1	5.74	1.6	1.35	-0.64	0.0242	0.181	Under-expressed
MTA3	2p21	10.11	9.87	0.58	0.54	0.24	0.0242	0.181	Over-expressed
DPM1	20q13.13	9.67	9.47	0.46	0.55	0.2	0.0242	0.181	Over-expressed
TGFB1I1	16p11.2	8.2	8.61	0.93	1.14	-0.41	0.0244	0.182	Under-expressed
ZNF772	19q13.43	7.37	6.88	1.16	1.24	0.49	0.0244	0.183	Over-expressed
SMC1A	Xp11.22	11.85	11.54	0.8	0.62	0.31	0.0245	0.183	Over-expressed
ATG16L1	2q37.1	9.12	9.31	0.41	0.59	-0.2	0.0245	0.183	Under-expressed
ADAM19	5q33.3	8.79	9.27	1.2	1.06	-0.48	0.0246	0.183	Under-expressed
RHOC	1p13.2	11.93	12.25	0.77	0.71	-0.31	0.0246	0.183	Under-expressed
PLIN3	19p13.3	10.56	10.81	0.61	0.61	-0.25	0.0248	0.185	Under-expressed
CST3	20p11.21	11.05	11.45	0.89	1.14	-0.4	0.0249	0.185	Under-expressed
F13A1	6p25.1	7.95	8.87	2.44	1.68	-0.93	0.0249	0.185	Under-expressed
TMSB4XP8	4q22.1	14.44	14.8	0.88	0.87	-0.36	0.0249	0.186	Under-expressed
ABI3	17q21.32	7.27	7.68	0.95	1.01	-0.4	0.025	0.186	Under-expressed
ETHE1	19q13.31	8.66	8.98	0.79	0.75	-0.32	0.025	0.186	Under-expressed
PPFIA4	1q32.1	6.41	5.89	1.16	1.46	0.52	0.025	0.186	Over-expressed
FAM189B	1q22	10.49	10.14	0.84	0.89	0.36	0.025	0.186	Over-expressed
ADRA2A	10q25.2	6.18	6.96	1.96	1.7	-0.78	0.025	0.186	Under-expressed
TRIL	7p14.3	8.16	8.79	1.54	1.5	-0.63	0.025	0.186	Under-expressed
OLA1	2q31.1	11.26	11.03	0.56	0.57	0.23	0.025	0.186	Over-expressed
NR2F2	15q26.2	9.77	10.19	1.02	0.99	-0.42	0.025	0.186	Under-expressed
MMS22L	6q16.1	8.94	8.56	0.84	1.02	0.37	0.025	0.186	Over-expressed
CCDC96	4p16.1	4.98	5.38	0.95	1.03	-0.4	0.0251	0.186	Under-expressed
CLSPN	1p34.3	7.95	7.29	1.56	1.67	0.66	0.0251	0.186	Over-expressed
KRBA1	7q36.1	8.07	7.78	0.66	0.8	0.29	0.0251	0.186	Over-expressed
PXN	12q24.23	10.84	11.09	0.58	0.69	-0.25	0.0251	0.186	Under-expressed
LRBA	4q31.3	10.28	10.6	0.74	0.81	-0.32	0.0251	0.186	Under-expressed
OS9	12q13.3-q14.1	12.37	12.58	0.5	0.55	-0.21	0.0252	0.186	Under-expressed
JADE3	Xp11.3	9.41	9.15	0.56	0.8	0.27	0.0252	0.186	Over-expressed
RAB31	18p11.22	10.38	10.8	1.04	0.93	-0.42	0.0252	0.186	Under-expressed
SSRP1	11q12.1	12.51	12.28	0.49	0.68	0.23	0.0252	0.186	Over-expressed
MON1A	3p21.31	7.51	7.75	0.58	0.64	-0.25	0.0252	0.186	Under-expressed
IST1	16q22.2	11.23	11.4	0.43	0.4	-0.17	0.0253	0.186	Under-expressed
RNF141	11p15.4|11p15	9.49	9.77	0.67	0.72	-0.28	0.0254	0.187	Under-expressed
TMEM246	9q31.1	3.94	4.6	1.71	1.35	-0.66	0.0254	0.187	Under-expressed
PAXIP1-AS2	7q36.2	5.2	5.51	0.75	0.74	-0.31	0.0254	0.187	Under-expressed
DLG1	3q29	10.73	10.46	0.66	0.62	0.27	0.0254	0.187	Over-expressed
NUP85	17q25.1	10.09	9.86	0.54	0.55	0.22	0.0254	0.187	Over-expressed
FAM102A	9q34.11	10.91	11.17	0.64	0.65	-0.27	0.0255	0.187	Under-expressed
UTP18	17q21.33	9.85	9.63	0.55	0.52	0.22	0.0255	0.187	Over-expressed
C9ORF116	9q34.3	4.88	5.45	1.45	1.25	-0.57	0.0255	0.187	Under-expressed
GAS2L1	22q12.2	9.17	9.55	0.98	0.8	-0.38	0.0255	0.187	Under-expressed
USP47	11p15.3	10.45	10.69	0.6	0.52	-0.24	0.0255	0.187	Under-expressed
LINC02591	1q21.1	6.72	7.3	1.5	1.2	-0.58	0.0255	0.187	Under-expressed
ERAP2	5q15	8.36	9.18	2.08	1.8	-0.82	0.0256	0.187	Under-expressed
POLE2	14q21.3	7.06	6.71	0.71	1.08	0.35	0.0256	0.187	Over-expressed
TANK	2q24.2	9.83	10.1	0.61	0.72	-0.27	0.0256	0.187	Under-expressed
DDX18	2q14.1	11.27	11.03	0.59	0.55	0.24	0.0256	0.187	Over-expressed
KNTC1	12q24.31	9.53	9.23	0.69	0.8	0.3	0.0256	0.187	Over-expressed
TBL3	16p13.3	9.66	9.96	0.77	0.62	-0.3	0.0256	0.187	Under-expressed
PIK3IP1	22q12.2	8.91	9.25	0.74	0.98	-0.34	0.0258	0.188	Under-expressed
TMEM127	2q11.2	10.94	11.12	0.45	0.41	-0.18	0.0258	0.188	Under-expressed
CDC123	10p14-p13	11.18	10.87	0.79	0.67	0.31	0.0258	0.188	Over-expressed
BDKRB2	14q32.2	6.95	7.48	1.39	1.1	-0.54	0.0259	0.188	Under-expressed
AFF1	4q21.3-q22.1	9.84	10.19	0.88	0.8	-0.35	0.0259	0.188	Under-expressed
C10ORF95	10q24.32	3.44	2.94	1.25	1.13	0.5	0.026	0.189	Over-expressed
PLCB1	20p12.3	7.21	7.88	1.73	1.41	-0.67	0.026	0.189	Under-expressed
STX4	16p11.2	9.31	9.55	0.56	0.63	-0.24	0.026	0.189	Under-expressed
BBS4	15q24.1	7.55	7.82	0.62	0.7	-0.27	0.026	0.189	Under-expressed
EXO1	1q43	9.06	8.65	0.85	1.26	0.41	0.026	0.189	Over-expressed
MAMSTR	19q13.33	5.31	4.76	1.33	1.33	0.55	0.026	0.189	Over-expressed
PLAAT4	11q12.3	8.78	9.57	1.99	1.84	-0.8	0.026	0.189	Under-expressed
EHD3	2p23.1	7.73	8.08	0.85	0.87	-0.35	0.026	0.189	Under-expressed
HRH1	3p25.3	7.03	7.42	0.95	0.99	-0.4	0.026	0.189	Under-expressed
SMIM1	1p36.32	3.41	3.93	1.18	1.47	-0.52	0.0261	0.189	Under-expressed
NDFIP1	5q31.3	11.03	11.18	0.32	0.44	-0.15	0.0261	0.189	Under-expressed
MIR22HG	17p13.3	6.43	6.8	0.93	0.81	-0.37	0.0261	0.189	Under-expressed
SLC22A18	11p15.4	7.15	7.64	1.17	1.27	-0.49	0.0261	0.189	Under-expressed
MAGEF1	3q27.1	10.57	10.28	0.7	0.74	0.29	0.0261	0.189	Over-expressed
MTUS1	8p22	9.69	10.17	1.14	1.24	-0.48	0.0262	0.189	Under-expressed
SEC16A	9q34.3	11.36	11.57	0.43	0.66	-0.21	0.0262	0.189	Under-expressed
TET1	10q21.3	7.14	6.6	1.31	1.3	0.54	0.0262	0.189	Over-expressed
ENHO	9p13.3	6.52	5.78	1.72	1.99	0.74	0.0263	0.189	Over-expressed
UBP1	3p22.3	11.14	10.91	0.58	0.5	0.23	0.0263	0.189	Over-expressed
MOCS3	20q13.13	8.12	7.91	0.5	0.52	0.21	0.0263	0.189	Over-expressed
RAB8B	15q22.2	8.84	9.18	0.88	0.75	-0.35	0.0263	0.189	Under-expressed
PON2	7q21.3	10.22	10.51	0.69	0.79	-0.3	0.0263	0.19	Under-expressed
LOC642846	12p13.31	7.84	7.45	1	0.9	0.4	0.0263	0.19	Over-expressed
BIRC5	17q25.3	9.89	9.46	0.91	1.32	0.43	0.0263	0.19	Over-expressed
PTGDS	9q34.3	7.09	7.95	2	2.28	-0.86	0.0264	0.19	Under-expressed
POGZ	1q21.3	11.5	11.25	0.6	0.65	0.25	0.0264	0.19	Over-expressed
ETS1	11q24.3	11.08	11.49	1.03	0.91	-0.41	0.0264	0.19	Under-expressed
TSPAN1	1p34.1	5.54	6.42	1.82	2.72	-0.88	0.0265	0.19	Under-expressed
ZNF607	19q13.12	8.25	7.89	0.84	0.91	0.35	0.0265	0.19	Over-expressed
ZSCAN21	7q22.1	7.99	7.82	0.43	0.41	0.17	0.0265	0.19	Over-expressed
OSBPL5	11p15.4	8.86	9.14	0.64	0.8	-0.28	0.0265	0.19	Under-expressed
AMER1	Xq11.2	8.93	8.6	0.84	0.81	0.34	0.0265	0.19	Over-expressed
NUP58	13q12.13	10.32	10.04	0.71	0.68	0.29	0.0267	0.191	Over-expressed
DUSP5	10q25.2	8.56	9	1.07	1.09	-0.44	0.0267	0.191	Under-expressed
NAPA	19q13.32-q13.33	11.28	11.51	0.59	0.58	-0.24	0.0267	0.191	Under-expressed
PCDHB12	5q31.3	3.77	4.38	1.59	1.24	-0.61	0.0268	0.191	Under-expressed
ZFYVE9	1p32.3	9.37	9.09	0.68	0.68	0.28	0.0268	0.191	Over-expressed
ZNF90	19p12	7.72	7.29	0.98	1.18	0.43	0.0268	0.192	Over-expressed
KIAA1324	1p13.3	10.16	11.05	2.18	2.21	-0.89	0.0268	0.192	Under-expressed
TBX6	16p11.2	4.04	4.53	1.24	1.13	-0.49	0.0269	0.192	Under-expressed
KLC3	19q13.32	7.58	7.05	1.26	1.4	0.53	0.0269	0.192	Over-expressed
USP6NL	10p14	10.08	9.78	0.7	0.77	0.3	0.0269	0.192	Over-expressed
FZD10	12q24.33	4.05	4.87	2.04	1.95	-0.82	0.0269	0.192	Under-expressed
MTHFD1L	6q25.1	9.8	9.43	0.85	1.04	0.37	0.027	0.192	Over-expressed
TRAF7	16p13.3	11.19	11.42	0.56	0.55	-0.23	0.027	0.192	Under-expressed
LINC00324	17p13.1	5.05	5.38	0.74	0.9	-0.32	0.027	0.192	Under-expressed
EIPR1	2p25.3	9.13	8.87	0.63	0.64	0.26	0.027	0.192	Over-expressed
DRC3	17p11.2	3.49	4.07	1.45	1.3	-0.57	0.027	0.192	Under-expressed
WDR12	2q33.2	9.43	9.18	0.61	0.63	0.25	0.027	0.192	Over-expressed
RNF138	18q12.1	9.63	9.34	0.75	0.67	0.3	0.0271	0.192	Over-expressed
MMACHC	1p34.1	7.97	7.75	0.47	0.64	0.22	0.0271	0.192	Over-expressed
NOC3L	10q23.33	9.02	8.78	0.61	0.55	0.24	0.0271	0.192	Over-expressed
RNF220	1p34.1	10.61	10.42	0.45	0.5	0.19	0.0271	0.192	Over-expressed
LINC02035	3q21.1	7.19	6.9	0.72	0.67	0.29	0.0273	0.193	Over-expressed
GVINP1	11p15.4	5.78	6.56	2.05	1.59	-0.78	0.0273	0.193	Under-expressed
SF1	11q13.1	12.2	12.08	0.3	0.32	0.12	0.0273	0.193	Over-expressed
MLLT10	10p12.31	9.76	9.5	0.57	0.75	0.26	0.0273	0.193	Over-expressed
PLEKHG6	12p13.31	8.83	8.25	1.38	1.54	0.58	0.0274	0.194	Over-expressed
SLC44A4	6p21.33	4.65	5.91	2.98	3.3	-1.25	0.0274	0.194	Under-expressed
PELI3	11q13.2	8.06	7.75	0.8	0.66	0.31	0.0275	0.194	Over-expressed
LINGO1	15q24.3	8.06	7.39	1.61	1.71	0.67	0.0275	0.194	Over-expressed
INTS4P2	7q11.21	3.52	3.2	0.67	0.99	0.32	0.0275	0.194	Over-expressed
TBX3	12q24.21	8.54	9.21	1.77	1.26	-0.66	0.0275	0.194	Under-expressed
KCTD12	13q22.3	10.34	10.75	1.02	0.92	-0.4	0.0275	0.194	Under-expressed
CRAMP1	16p13.3	9.41	9.63	0.51	0.62	-0.22	0.0275	0.194	Under-expressed
RPL32P3	3q21.3	7.27	6.92	0.92	0.78	0.36	0.0275	0.194	Over-expressed
SNAP29	22q11.21	9.83	10.01	0.46	0.45	-0.18	0.0276	0.194	Under-expressed
ANKRD34A	1q21.1	4.12	4.56	0.99	1.3	-0.44	0.0276	0.194	Under-expressed
WNT11	11q13.5	6.4	5.57	2.01	2.1	0.83	0.0276	0.194	Over-expressed
ATAD5	17q11.2	7.54	7.17	0.85	1.02	0.37	0.0276	0.194	Over-expressed
ABCB4	7q21.12	3.65	4.11	1	1.35	-0.46	0.0276	0.194	Under-expressed
PDHB	3p14.3	9.91	10.06	0.36	0.36	-0.15	0.0277	0.194	Under-expressed
PMS1	2q32.2	8.61	8.36	0.62	0.56	0.24	0.0277	0.194	Over-expressed
ELOVL4	6q14.1	6.63	5.84	2.02	1.76	0.79	0.0278	0.195	Over-expressed
PPIC	5q23.2	9.61	9.99	1.01	0.73	-0.38	0.0278	0.195	Under-expressed
RTN4	2p16.1	12.33	12.52	0.45	0.49	-0.19	0.0278	0.195	Under-expressed
S1PR3	9q22.1	8.56	8.99	1.08	1.02	-0.43	0.0278	0.195	Under-expressed
NMB	15q25.2	7.6	7.13	1.17	1.16	0.47	0.0278	0.195	Over-expressed
MAPT	17q21.31	6.4	7.25	2.15	1.95	-0.85	0.0279	0.195	Under-expressed
PNPLA6	19p13.2	10.27	10	0.68	0.64	0.27	0.0279	0.195	Over-expressed
VDAC3	8p11.21	11.45	11.14	0.71	0.85	0.31	0.0279	0.195	Over-expressed
BTD	3p25.1	7.93	8.21	0.7	0.66	-0.28	0.0279	0.195	Under-expressed
RPS3	11q13.4	14.7	14.34	0.93	0.77	0.36	0.028	0.195	Over-expressed
MFSD13A	10q24.32	7.04	6.7	0.84	0.79	0.34	0.028	0.195	Over-expressed
PPIE	1p34.2	9.98	9.77	0.49	0.54	0.21	0.0281	0.195	Over-expressed
MAP3K7CL	21q21.3	5.75	6.13	0.94	0.92	-0.38	0.0281	0.195	Under-expressed
MSANTD3	9q31.1	8.8	8.57	0.53	0.64	0.23	0.0281	0.195	Over-expressed
RHCE	1p36.11	4.67	3.97	1.67	1.85	0.7	0.0281	0.195	Over-expressed
IFFO1	12p13.31	6.74	7.14	0.94	1.09	-0.4	0.0281	0.195	Under-expressed
CEP131	17q25.3	8.91	8.52	0.88	1.08	0.38	0.0281	0.195	Over-expressed
BASP1	5p15.1	8.74	9.25	1.3	1.16	-0.51	0.0281	0.195	Under-expressed
IER3	6p21.33	9.97	10.45	1.11	1.3	-0.47	0.0281	0.195	Under-expressed
CCDC90B	11q14.1	9.55	9.36	0.48	0.43	0.19	0.0282	0.196	Over-expressed
HTR2B	2q37.1	3.65	4.19	1.33	1.39	-0.54	0.0282	0.196	Under-expressed
TMEM38B	9q31.2	7.38	6.89	1.21	1.14	0.48	0.0282	0.196	Over-expressed
MPV17	2p23.3	9.58	9.83	0.56	0.69	-0.24	0.0282	0.196	Under-expressed
MCM5	22q12.3	10.85	10.56	0.73	0.65	0.28	0.0284	0.197	Over-expressed
SNHG10	14q32.13	6.58	6.24	0.82	0.87	0.34	0.0284	0.197	Over-expressed
HLA-DPA1	6p21.32	12.01	12.52	1.28	1.27	-0.52	0.0284	0.197	Under-expressed
CENPQ	6p12.3	7.48	7.17	0.81	0.65	0.31	0.0285	0.197	Over-expressed
GDI2	10p15.1	13.36	13.11	0.62	0.62	0.25	0.0285	0.197	Over-expressed
ACVR1	2q24.1	9.4	9.7	0.77	0.63	-0.3	0.0286	0.197	Under-expressed
AQP3	9p13.3	8.4	9.22	1.89	2.26	-0.81	0.0286	0.197	Under-expressed
HNRNPCL3	1p36.21	3.76	3.49	0.68	0.63	0.27	0.0286	0.197	Over-expressed
AK5	1p31.1	4.69	5.69	2.49	2.42	-1	0.0286	0.197	Under-expressed
COL15A1	9q22.33	10.53	11.05	1.37	1.03	-0.52	0.0287	0.198	Under-expressed
GPSM3	6p21.32	8.53	8.92	0.93	1.08	-0.39	0.0288	0.198	Under-expressed
ITGA2	5q11.2	8.64	9.23	1.48	1.42	-0.59	0.0288	0.198	Under-expressed
FAM174A	5q21.1	7.18	7.46	0.68	0.77	-0.29	0.0288	0.198	Under-expressed
[truncated: 11,771 more rows]

## Sheet: TNBC RPPA enrichment
Gene	Cytoband	Mean in altered group	Mean in unaltered group	SD in altered group	SD in unaltered group	Log Ratio	p-Value	q-Value	Tendency
CCNB1	5q13.2	0.46	-0.11	0.64	0.9	0.57	2.546e-05	0.00337	Over-expressed
CCNE1	19q12	0.31	-0.23	0.76	0.52	0.54	2.97e-05	0.00337	Over-expressed
PDK1_PS241	2q31.1	-0.23	0	0.34	0.29	-0.24	5.53e-05	0.004184	Under-expressed
BRD4	19p13.12	0.13	-0.28	0.56	0.63	0.41	0.000111	0.004768	Over-expressed
PDK1	2q31.1	-0.07	0.06	0.19	0.2	-0.13	0.0001218	0.004768	Under-expressed
MSH6	2p16.3	0.53	0.03	0.68	0.75	0.49	0.000126	0.004768	Over-expressed
ARID1A	1p36.11	0.2	0.04	0.26	0.26	0.16	0.0008672	0.0281	Over-expressed
AR	Xq12	-0.39	0	0.6	0.77	-0.4	0.001	0.0284	Under-expressed
PCNA	20p12.3	0.02	-0.13	0.27	0.24	0.15	0.001487	0.0342	Over-expressed
FOXM1	12p13.33	0.55	0.23	0.58	0.53	0.32	0.001507	0.0342	Over-expressed
FASN	17q25.3	-0.31	0.18	0.82	1	-0.49	0.002168	0.0447	Under-expressed
CDKN2A	9p21.3	0.97	0.44	1	0.89	0.52	0.002742	0.0519	Over-expressed
XRCC1	19q13.31	0.05	-0.1	0.31	0.25	0.15	0.003339	0.0583	Over-expressed
MAPK8_PT183	10q11.22	-0.01	0.1	0.22	0.22	-0.11	0.00401	0.065	Under-expressed
CCNE2	8q22.1	-0.02	-0.26	0.54	0.35	0.25	0.005156	0.078	Over-expressed
MTOR_PS2448	1p36.2	-0.07	0.02	0.19	0.21	-0.1	0.006248	0.0855	Under-expressed
RPS6	9p22.1	-0.02	-0.31	0.54	0.66	0.29	0.006401	0.0855	Over-expressed
EGFR	7p11.2	-0.09	0.11	0.23	0.61	-0.19	0.007899	0.0914	Under-expressed
COL6A1	21q22.3	0.34	0.63	0.55	0.69	-0.28	0.008779	0.0914	Under-expressed
AKT1_2_3_PS473	14q32.32	-0.21	0.24	0.91	1.06	-0.45	0.008856	0.0914	Under-expressed
EGFR_PY1068	7p12	0.04	0.25	0.3	0.64	-0.21	0.009593	0.0947	Under-expressed
CASP8	2q33.1	-0.09	0.02	0.26	0.17	-0.11	0.0118	0.11	Under-expressed
CDKN1B	12p13.1	0.19	0.03	0.41	0.3	0.17	0.0137	0.11	Over-expressed
ASNS	7q21.3	0.62	0.36	0.56	0.68	0.27	0.0138	0.11	Over-expressed
CDK1_PY15	10q21.1	0.16	-0.01	0.4	0.36	0.17	0.0139	0.11	Over-expressed
DIRAS3	1p31.3	0.04	0.16	0.28	0.26	-0.12	0.0144	0.11	Under-expressed
RBM15	1p13.3	0.08	-0.23	0.67	0.77	0.3	0.0162	0.11	Over-expressed
SMAD3	15q22.33	-0.16	-0.28	0.31	0.27	0.13	0.0163	0.11	Over-expressed
G6PD	Xq28	-0.15	0.02	0.36	0.48	-0.17	0.0166	0.11	Under-expressed
ACACA_PS79	17q21	-0.06	0.18	0.53	0.61	-0.24	0.0166	0.11	Under-expressed
ACACB_PS79	12q24.11	-0.06	0.18	0.53	0.61	-0.24	0.0166	0.11	Under-expressed
ADAR	1q21.3	0.2	0.02	0.44	0.41	0.18	0.0169	0.11	Over-expressed
RB1	13q14.2	-0.17	-0.07	0.24	0.2	-0.1	0.0172	0.11	Under-expressed
MAPK14_PT180_Y182	6p21.3-p21.2	0	0.22	0.52	0.52	-0.22	0.0175	0.11	Under-expressed
CDK1	10q21.2	0.06	-0.04	0.23	0.21	0.09	0.0197	0.121	Over-expressed
IRS1	2q36.3	-0.07	0.05	0.27	0.31	-0.12	0.0204	0.122	Under-expressed
MET	7q31.2	-0.07	0.1	0.49	0.18	-0.17	0.0233	0.136	Under-expressed
RPS6_PS240_S244	9p21	-0.04	0.23	0.68	0.69	-0.27	0.0262	0.141	Under-expressed
TP53	17p13.1	0.28	0.07	0.57	0.43	0.21	0.0269	0.141	Over-expressed
CLDN7	17p13.1	0.25	-0.18	1.2	0.77	0.43	0.0274	0.141	Over-expressed
RAB11A	15q22.31	0.14	0.26	0.29	0.34	-0.12	0.0279	0.141	Under-expressed
RAB11B	19p13.2	0.14	0.26	0.29	0.34	-0.12	0.0279	0.141	Under-expressed
PECAM1	17q23.3	0.1	0.18	0.18	0.24	-0.08	0.0279	0.141	Under-expressed
CAV1	7q31.2	-0.74	-0.37	0.94	1.01	-0.37	0.0304	0.15	Under-expressed
EIF4EBP1	8p11.23	0.34	0.12	0.61	0.51	0.22	0.0319	0.152	Over-expressed
SYK	9q22.2	0.37	0.05	0.89	0.73	0.32	0.0326	0.152	Over-expressed
RPS6KB1_PT389	17q23.1	0.02	0.15	0.3	0.37	-0.12	0.0334	0.152	Under-expressed
CDKN1A	6p21.2	0.01	0.13	0.31	0.3	-0.12	0.0335	0.152	Under-expressed
FOXO3_PS318_S321	6q21	0.08	0.14	0.14	0.17	-0.06	0.0384	0.169	Under-expressed
INPP4B	4q31.21	-0.28	-0.06	0.58	0.64	-0.22	0.0386	0.169	Under-expressed
ARAF_PS299	Xp11.4-p11.2	0.14	0.23	0.23	0.28	-0.09	0.0436	0.181	Under-expressed
SMAD1	4q31.21	0.03	-0.07	0.3	0.29	0.11	0.0442	0.181	Over-expressed
PIK3R1	5q13.1	-0.09	0.04	0.37	0.33	-0.13	0.0445	0.181	Under-expressed
PIK3R2	19p13.11	-0.09	0.04	0.37	0.33	-0.13	0.0445	0.181	Under-expressed
DIABLO	12q24.31	-0.39	-0.54	0.4	0.42	0.15	0.0464	0.181	Over-expressed
ACACA	17q12	-0.18	0.03	0.54	0.65	-0.21	0.0465	0.181	Under-expressed
CHEK2	22q12.1	0.04	-0.1	0.39	0.44	0.14	0.0483	0.181	Over-expressed
CHEK2_PT68	22q12.1	0.25	0.17	0.21	0.24	0.08	0.0484	0.181	Over-expressed
TUBA1B	12q13.12	-0.08	-0.38	0.78	0.94	0.29	0.049	0.181	Over-expressed
TSC2_PT1462	16p13.3	-0.01	0.09	0.26	0.32	-0.1	0.0493	0.181	Under-expressed
EGFR_PY1173	7p12	-0.01	0.06	0.13	0.32	-0.08	0.0531	0.189	Under-expressed
GAPDH	12p13.31	-0.47	-0.93	1.34	1.34	0.46	0.0534	0.189	Over-expressed
DPP4	2q24.2	0	0.08	0.2	0.32	-0.08	0.0558	0.195	Under-expressed
SETD2	3p21.31	-0.03	0.05	0.26	0.2	-0.08	0.0569	0.196	Under-expressed
COPS5	8q13.1	-0.02	0.08	0.31	0.29	-0.1	0.0605	0.203	Under-expressed
BRCA2	13q13.1	0.07	-0.01	0.22	0.23	0.08	0.0607	0.203	Over-expressed
SHC1_PY317	1q21	0.08	0.16	0.21	0.25	-0.07	0.0634	0.205	Under-expressed
MAP2K1_PS217_S221	15q22.1-q22.33	0.09	0.23	0.42	0.39	-0.14	0.0638	0.205	Under-expressed
NDRG1_PT346	8q24.3	0.44	0.76	0.93	1	-0.31	0.064	0.205	Under-expressed
JAK2	9p24.1	-0.06	-0.18	0.36	0.37	0.12	0.0694	0.219	Over-expressed
XRCC5	2q35	-0.08	-0.21	0.41	0.41	0.13	0.0705	0.219	Over-expressed
MSH2	2p21-p16.3	0.23	0.05	0.6	0.48	0.18	0.0735	0.225	Over-expressed
MYH9_PS1943	22q13.1	0.02	0.15	0.45	0.32	-0.13	0.0768	0.229	Under-expressed
MAPK9	5q35.3	-0.21	-0.11	0.29	0.33	-0.1	0.0775	0.229	Under-expressed
BRAF	7q34	-0.14	-0.29	0.49	0.51	0.16	0.0777	0.229	Over-expressed
BRAF_PS445	7q34	-0.01	-0.09	0.26	0.31	0.08	0.0854	0.249	Over-expressed
LCK	1p35.2	0.16	0.33	0.56	0.55	-0.17	0.0865	0.249	Under-expressed
PTEN	10q23.31	-0.25	-0.02	0.86	0.54	-0.23	0.0906	0.257	Under-expressed
PEA15_PS116	1q21.1	-0.29	-0.19	0.3	0.4	-0.1	0.108	0.301	Under-expressed
STMN1	1p36.11	0.24	0.16	0.26	0.27	0.07	0.111	0.307	Over-expressed
BCL2L11	2q13	0.17	0.03	0.53	0.42	0.14	0.115	0.312	Over-expressed
FN1	2q35	0.7	0.87	0.54	0.71	-0.17	0.119	0.312	Under-expressed
DVL3	3q27.1	0.08	-0.02	0.34	0.38	0.1	0.121	0.312	Over-expressed
AKT1_PT308	14q32.32	-0.07	0.17	0.85	0.95	-0.24	0.121	0.312	Under-expressed
AKT2_PT308	19q13.1-q13.2	-0.07	0.17	0.85	0.95	-0.24	0.121	0.312	Under-expressed
AKT3_PT308	1q44	-0.07	0.17	0.85	0.95	-0.24	0.121	0.312	Under-expressed
EIF4G1	3q27.1	0.1	-0.02	0.46	0.41	0.12	0.125	0.32	Over-expressed
GAB2	11q14.1	0.24	0.08	0.62	0.57	0.16	0.133	0.336	Over-expressed
GSK3A	19q13.2	-0.06	-0.14	0.3	0.29	0.08	0.14	0.347	Over-expressed
GSK3B	3q13.33	-0.06	-0.14	0.3	0.29	0.08	0.14	0.347	Over-expressed
RAF1	3p25.2	0.1	0.03	0.28	0.23	0.07	0.145	0.353	Over-expressed
MAPK1_PT202_Y204	22q11.21	0.18	0.38	0.79	0.78	-0.2	0.156	0.373	Under-expressed
MAPK3_PT202_Y204	16p11.2	0.18	0.38	0.79	0.78	-0.2	0.156	0.373	Under-expressed
EIF4EBP1_PT70	8p12	0.06	0	0.22	0.23	0.06	0.159	0.376	Over-expressed
ERBB3_PY1289	12q13	0.05	0	0.22	0.16	0.05	0.166	0.389	Over-expressed
PREX1	20q13.13	0.09	0.21	0.51	0.45	-0.12	0.173	0.398	Under-expressed
MYH11	16p13.11	-0.36	0.02	1.73	1.33	-0.39	0.173	0.398	Under-expressed
PRKCA_PS657	17q22-q23.2	-0.28	-0.19	0.38	0.4	-0.09	0.177	0.402	Under-expressed
BAP1	3p21.1	-0.1	-0.2	0.44	0.33	0.1	0.181	0.407	Over-expressed
BAD_PS112	11q13.1	0.16	0.1	0.28	0.21	0.06	0.183	0.408	Over-expressed
TIGAR	12p13.32	0.01	-0.05	0.31	0.2	0.06	0.188	0.415	Over-expressed
PRKCB_PS660	16p11.2	-0.18	-0.04	0.63	0.49	-0.14	0.191	0.416	Under-expressed
STK11	19p13.3	0.02	0.07	0.23	0.21	-0.05	0.193	0.416	Under-expressed
CDH1	16q22.1	-0.29	-0.46	0.66	0.85	0.17	0.195	0.417	Over-expressed
YWHAB	20q13.12	0.07	0.12	0.21	0.2	-0.05	0.199	0.423	Under-expressed
KIT	4q12	0.97	0.75	1.07	0.8	0.22	0.204	0.429	Over-expressed
EEF2K	16p12.2	-0.23	-0.14	0.44	0.38	-0.09	0.21	0.438	Under-expressed
RAB25	1q22	0.32	0.18	0.71	0.63	0.14	0.232	0.479	Over-expressed
IRF1	5q31.1	0.07	0.01	0.29	0.28	0.06	0.24	0.49	Over-expressed
MAPK14	6p21.31	0.06	0.11	0.26	0.19	-0.05	0.254	0.515	Under-expressed
ERBB2_PY1248	17q12	-0.01	0.06	0.28	0.4	-0.07	0.257	0.517	Under-expressed
CHEK1_PS296	11q24.2	0.14	0.1	0.23	0.2	0.04	0.263	0.522	Over-expressed
CDKN1B_PT157	12p13.1-p12	0.15	0.12	0.14	0.2	0.03	0.264	0.522	Over-expressed
ETS1	11q24.3	-0.21	-0.09	0.61	0.64	-0.12	0.271	0.527	Under-expressed
SRC	20q11.23	0.07	0	0.39	0.31	0.07	0.274	0.527	Over-expressed
SNAI1	20q13.13	0.06	0.13	0.41	0.26	-0.07	0.276	0.527	Under-expressed
MTOR	1p36.22	-0.17	-0.23	0.32	0.27	0.06	0.276	0.527	Over-expressed
MYC	8q24.21	0.34	0.44	0.54	0.59	-0.11	0.287	0.541	Under-expressed
ERBB3	12q13.2	-0.08	-0.01	0.34	0.44	-0.07	0.289	0.541	Under-expressed
BID	22q11.21	0.08	0.12	0.22	0.27	-0.04	0.298	0.554	Under-expressed
PARK7	1p36.23	-0.2	-0.14	0.29	0.35	-0.06	0.303	0.558	Under-expressed
CASP3	4q35.1	-0.03	-0.09	0.37	0.32	0.06	0.305	0.558	Over-expressed
CDH2	18q12.1	0.02	0.09	0.38	0.41	-0.07	0.319	0.575	Under-expressed
ITGA2	5q11.2	-0.05	0.02	0.44	0.36	-0.07	0.319	0.575	Under-expressed
TGM2	20q11.23	-0.41	-0.34	0.42	0.32	-0.07	0.338	0.592	Under-expressed
KDR	4q12	0.1	0.17	0.41	0.4	-0.07	0.339	0.592	Under-expressed
SCD	10q24.31	-0.07	-0.02	0.28	0.3	-0.05	0.341	0.592	Under-expressed
GSK3A_PS9	19q13.2	-0.15	-0.04	0.66	0.66	-0.11	0.342	0.592	Under-expressed
GSK3B_PS9	3q13.3	-0.15	-0.04	0.66	0.66	-0.11	0.342	0.592	Under-expressed
MRE11	11q21	0.18	0.22	0.18	0.25	-0.03	0.344	0.592	Under-expressed
RPS6_PS235_S236	9p21	0.07	0.17	0.53	0.66	-0.1	0.347	0.592	Under-expressed
ANXA1	9q21.13	0.08	0.2	0.71	0.67	-0.11	0.353	0.598	Under-expressed
BAK1	6p21.31	-0.04	-0.11	0.4	0.42	0.07	0.358	0.602	Over-expressed
TFRC	3q29	-0.65	-0.79	0.88	0.91	0.14	0.366	0.61	Over-expressed
CCND1	11q13.3	0.03	0.06	0.21	0.22	-0.03	0.383	0.634	Under-expressed
PRKAA1_PT172	5p12	-0.27	-0.18	0.61	0.54	-0.09	0.39	0.641	Under-expressed
RAF1_PS338	3p25	-0.05	-0.03	0.13	0.17	-0.02	0.4	0.653	Under-expressed
NFKB1_PS536	4q24	0.49	0.38	0.69	0.79	0.1	0.419	0.679	Over-expressed
YWHAZ	8q22.3	0.15	0.09	0.41	0.33	0.05	0.422	0.679	Over-expressed
PEA15	1q23.2	-0.09	-0.05	0.33	0.26	-0.04	0.437	0.698	Under-expressed
EIF4EBP1_PT37_T46	8p12	0.27	0.19	0.67	0.57	0.09	0.444	0.704	Over-expressed
PRKCD_PS664	3p21.31	-0.06	-0.04	0.17	0.19	-0.02	0.447	0.704	Under-expressed
NF2	22q12.2	-0.39	-0.34	0.35	0.39	-0.05	0.457	0.704	Under-expressed
RAD51	15q15.1	0.02	-0.03	0.35	0.32	0.04	0.458	0.704	Over-expressed
ERRFI1	1p36.23	0.04	0	0.29	0.23	0.03	0.462	0.704	Over-expressed
NRG1	8p12	0	0.03	0.21	0.26	-0.03	0.463	0.704	Under-expressed
ERCC5	13q33.1	-0.1	-0.15	0.4	0.36	0.05	0.464	0.704	Over-expressed
MAPK1	22q11.22	-0.32	-0.26	0.51	0.41	-0.06	0.465	0.704	Under-expressed
EPPK1	8q24.3	0.65	0.83	1.44	1.35	-0.18	0.468	0.704	Under-expressed
JUN_PS73	1p32-p31	0.1	0.14	0.26	0.22	-0.03	0.472	0.705	Under-expressed
AKT1S1_PT246	19q13.33	-0.01	0.01	0.22	0.2	-0.03	0.476	0.706	Under-expressed
GATA3	10p14	0.24	0.32	0.67	0.61	-0.08	0.479	0.706	Under-expressed
RPS6KB1	17q23.1	-0.07	-0.11	0.34	0.32	0.04	0.483	0.707	Over-expressed
YBX1_PS102	1p34	0.02	0.05	0.23	0.24	-0.03	0.496	0.72	Under-expressed
ESR1_PS118	6q25.1	-0.41	-0.44	0.27	0.21	0.03	0.498	0.72	Over-expressed
TP53BP1	15q15.3	-0.43	-0.48	0.48	0.44	0.06	0.501	0.72	Over-expressed
HSPA1A	6p21.33	0.54	0.64	0.9	0.89	-0.1	0.524	0.748	Under-expressed
BIRC2	11q22.2	-0.01	-0.04	0.26	0.21	0.03	0.54	0.766	Over-expressed
PARP1	1q42.12	-0.06	-0.01	0.51	0.31	-0.05	0.552	0.776	Under-expressed
ACVRL1	12q13.13	0.15	0.17	0.18	0.22	-0.02	0.554	0.776	Under-expressed
STAT5A	17q21.2	0.62	0.51	1.09	0.84	0.1	0.56	0.776	Over-expressed
PGR	11q22.1	-0.13	-0.12	0.14	0.15	-0.01	0.565	0.776	Under-expressed
RPS6KA1_PT359_S363	1p	0.16	0.19	0.29	0.31	-0.03	0.566	0.776	Under-expressed
FOXO3	6q21	0.13	0.15	0.21	0.24	-0.02	0.573	0.776	Under-expressed
ESR1	6q25.1-q25.2	-1.15	-1.07	0.81	0.66	-0.08	0.575	0.776	Under-expressed
TSC1	9q34.13	0.06	0.01	0.56	0.3	0.05	0.579	0.776	Over-expressed
ABL1	9q34.12	-0.02	-0.04	0.2	0.23	0.02	0.581	0.776	Over-expressed
CDKN1B_PT198	12p13.1-p12	0.13	0.14	0.18	0.22	-0.02	0.584	0.776	Under-expressed
BAX	19q13.33	-0.12	-0.15	0.29	0.25	0.03	0.585	0.776	Over-expressed
NOTCH1	9q34.3	0.16	0.19	0.28	0.3	-0.03	0.589	0.777	Under-expressed
WWTR1	3q25.1	0.09	0.12	0.31	0.26	-0.03	0.613	0.805	Under-expressed
RPS6KA1	1p36.11	0.04	0.01	0.34	0.33	0.03	0.624	0.814	Over-expressed
TSC2	16p13.3	-0.17	-0.14	0.41	0.36	-0.03	0.633	0.814	Under-expressed
RICTOR	5p13.1	-0.2	-0.24	0.56	0.5	0.04	0.643	0.814	Over-expressed
YWHAE	17p13.3	0.04	0.05	0.15	0.14	-0.01	0.647	0.814	Under-expressed
CASP7	10q25.3	0.18	0.26	1.06	0.9	-0.08	0.648	0.814	Under-expressed
ARAF	Xp11.3	0.14	0.12	0.24	0.24	0.02	0.654	0.814	Over-expressed
PRKAA1	5p13.1	-0.36	-0.34	0.24	0.25	-0.02	0.657	0.814	Under-expressed
SRSF1	17q22	-0.03	-0.05	0.25	0.24	0.02	0.657	0.814	Over-expressed
NRAS	1p13.2	0.06	0.08	0.29	0.25	-0.02	0.658	0.814	Under-expressed
ERCC1	19q13.32	-0.1	-0.08	0.2	0.16	-0.01	0.66	0.814	Under-expressed
SRC_PY416	20q12-q13	0.06	0.09	0.41	0.37	-0.03	0.66	0.814	Under-expressed
EEF2	19p13.3	-0.32	-0.35	0.44	0.51	0.04	0.668	0.819	Over-expressed
SRC_PY527	20q12-q13	0.14	0.19	0.72	0.65	-0.05	0.672	0.82	Under-expressed
PTPN11_PY542	12q24	0.02	0.04	0.27	0.32	-0.02	0.681	0.827	Under-expressed
MS4A1	11q12.2	0.01	0	0.23	0.23	0.02	0.697	0.84	Over-expressed
CHEK1_PS345	11q24.2	-0.02	-0.04	0.23	0.24	0.02	0.7	0.84	Over-expressed
XBP1	22q12.1|22q12	0.05	0.04	0.22	0.2	0.01	0.707	0.845	Over-expressed
YBX1	1p34.2	-0.08	-0.06	0.26	0.31	-0.02	0.717	0.853	Under-expressed
MET_PY1235	7q31	-0.01	-0.02	0.11	0.15	0.01	0.728	0.859	Over-expressed
RPTOR	17q25.3	-0.03	-0.05	0.31	0.24	0.02	0.73	0.859	Over-expressed
PIK3CA	3q26.32	0.1	0.12	0.22	0.4	-0.02	0.737	0.859	Under-expressed
PRKCA	17q24.2	-0.38	-0.36	0.4	0.42	-0.02	0.739	0.859	Under-expressed
BCL2A1	15q25.1	0.25	0.27	0.37	0.37	-0.02	0.741	0.859	Under-expressed
EIF4EBP1_PS65	8p12	-0.15	-0.13	0.25	0.27	-0.01	0.758	0.874	Under-expressed
CTNNB1	3p22.1	-0.44	-0.41	0.77	0.68	-0.03	0.793	0.91	Under-expressed
STAT3_PY705	17q21.31	0.14	0.16	0.38	0.36	-0.02	0.803	0.916	Under-expressed
EIF4E	4q23	-0.01	0	0.23	0.24	-0.01	0.81	0.92	Under-expressed
PXN	12q24.23	-0.23	-0.21	0.35	0.45	-0.02	0.817	0.923	Under-expressed
ANXA7	10q22.2	0.01	0.01	0.15	0.17	-0.01	0.833	0.937	Under-expressed
AKT1	14q32.33	-0.08	-0.07	0.47	0.41	-0.02	0.851	0.943	Under-expressed
AKT2	19q13.2	-0.08	-0.07	0.47	0.41	-0.02	0.851	0.943	Under-expressed
AKT3	1q43-q44	-0.08	-0.07	0.47	0.41	-0.02	0.851	0.943	Under-expressed
SQSTM1	5q35.3	0.01	0.03	0.71	0.51	-0.02	0.864	0.949	Under-expressed
PRDX1	1p34.1	0.13	0.14	0.4	0.3	-0.01	0.865	0.949	Under-expressed
BCL2L1	20q11.21	-0.21	-0.21	0.18	0.19	0	0.879	0.959	Over-expressed
BCL2	18q21.33	0.02	0.01	0.61	0.53	0.01	0.893	0.97	Over-expressed
RB1_PS807_S811	13q14.2	-0.32	-0.3	0.58	0.63	-0.01	0.904	0.97	Under-expressed
BECN1	17q21.31	0.05	0.05	0.18	0.22	0	0.906	0.97	Under-expressed
SMAD4	18q21.2	-0.05	-0.04	0.17	0.14	0	0.91	0.97	Under-expressed
PDCD4	10q25.2	0.21	0.2	0.56	0.54	0.01	0.914	0.97	Over-expressed
CDH3	16q22.1	0.16	0.17	0.23	0.22	0	0.916	0.97	Under-expressed
ERBB2	17q12	-0.29	-0.28	0.49	0.55	-0.01	0.92	0.97	Under-expressed
YAP1_PS127	11q13	-0.05	-0.06	0.8	0.52	0.01	0.923	0.97	Over-expressed
IGFBP2	2q35	-0.48	-0.47	0.84	0.82	-0.01	0.93	0.973	Under-expressed
SERPINE1	7q22.1	0.46	0.45	0.75	0.79	0.01	0.939	0.974	Over-expressed
GSK3A_PS21_S9	19q13.2	-0.07	-0.07	0.74	0.67	0.01	0.944	0.974	Over-expressed
GSK3B_PS21_S9	3q13.3	-0.07	-0.07	0.74	0.67	0.01	0.944	0.974	Over-expressed
MAP2K1	15q22.31	0.23	0.22	0.41	0.4	0	0.976	0.992	Over-expressed
ATM	11q22.3	0.11	0.12	0.82	0.64	0	0.983	0.992	Under-expressed
COG3	13q14.13	-0.15	-0.15	0.33	0.38	0	0.984	0.992	Over-expressed
RAD50	5q31.1	-0.34	-0.34	0.35	0.26	0	0.987	0.992	Over-expressed
RICTOR_PT1135	5p13.1	0.12	0.12	0.22	0.29	0	0.988	0.992	Under-expressed
YAP1	11q22.1	-0.05	-0.05	0.3	0.29	0	0.99	0.992	Over-expressed
CHEK1	11q24.2	0.12	0.12	0.35	0.2	0	0.992	0.992	Over-expressed

## Sheet: TNBC GEX Pathway
pathway	p-value	q-value	source	external_id	members_input_overlap	members_input_overlap_geneids	size	effective_size
Cell Cycle	7.10474e-18	1.35629e-14	Reactome	R-HSA-1640170	POLA2; MAD2L1; HAUS5; RFC5; CEP57; RAD9A; DSN1; POLE; NCAPG2; FOXM1; FBXL7; CCND2; CDCA5; KIF2C; GINS1; XPO1; GINS4; TPX2; DNA2; NEK2; HAUS6; ESCO2; SMC3; CCNE1; CDT1; SMC4; SKA1; POLD1; CDKN2A; RFC4; ESPL1; AURKA; AURKB; MRE11; CDCA8; HJURP; NUP210; CHEK1; CENPO; RARA; MCM10; BUB1; NUP107; CDC25C; CENPF; CDC25A; CCNA2; CENPA; ZWINT; BLM; CDC45; RUVBL1; MCM3; TERF2IP; RAD21; TOPBP1; ZWILCH; ORC1;…	54801; 55388; 1869; 54386; 57122; 4085; 9493; 9133; 55055; 993; 2305; 1763; 286826; 4751; 84296; 1058; 23225; 10926; 7316; 11200; 4172; 995; 55355; 55143; 983; 898; 5883; 1063; 147841; 51512; 8607; 22974; 84515; 6790; 83540; 81620; 5985; 5424; 9126; 54892; 5426; 894; 4361; 220134; 9212; 23649; 91687; 64151; 7514; 151648; 9700; 8318; 10112; 55920; 10051; 1029; 79980; 699; 1111; 23354; 7468; 4171; …	564	563
Cell Cycle Checkpoints	7.51058e-16	7.16884e-13	Reactome	R-HSA-69620	MAD2L1; RFC5; ZWINT; RAD9A; DSN1; CDKN2A; KIF2C; CDC7; XPO1; DNA2; CCNA2; MRE11; CCNE1; SKA1; AURKB; RFC4; CDCA8; CHEK2; CHEK1; CENPO; MCM10; BUB1; NUP107; CDC25C; CENPF; CDC25A; CENPA; ORC1; BLM; MCM6; MCM7; MCM2; ZWILCH; MCM8; NUF2; CCNB2; RCC2; TOPBP1; SGO1; GTSE1; CDC20; CDK1; CENPL; DBF4; UBC; CDC45; MCM3; NSD2; SPC25; SPC24	995; 55143; 55388; 983; 9212; 898; 5883; 1063; 57122; 57405; 11130; 890; 147841; 51512; 7316; 4175; 7514; 9133; 7468; 84515; 55055; 993; 151648; 8318; 4171; 83540; 1763; 4085; 55920; 8317; 991; 5985; 220134; 1058; 641; 1029; 4176; 10926; 79980; 699; 1111; 11073; 11004; 11200; 4998; 79172; 5984; 4172; 91687; 4361	250	249
Cell Cycle, Mitotic	1.25409e-15	7.98021e-13	Reactome	R-HSA-69278	POLA2; MAD2L1; HAUS5; RFC5; CEP57; NUF2; DSN1; POLE; NCAPG2; FOXM1; FBXL7; CDCA5; KIF2C; CDC7; XPO1; GINS4; TPX2; DNA2; NEK2; HAUS6; ESCO2; SMC3; CCNE1; CDT1; SMC4; SKA1; POLD1; CDKN2A; ESPL1; AURKA; AURKB; ZWINT; CDCA8; NUP210; TOP2A; CENPO; MCM10; BUB1; NUP107; CDC25C; CENPF; CDC25A; CCNA2; CENPA; ORC1; MCM7; CDC45; CCND2; MCM3; MCM2; RAD21; ZWILCH; MCM8; CCNB2; RCC2; GINS1; E2F1; LIN9; MCM6; S…	54801; 55388; 1869; 57122; 4085; 9493; 9133; 55055; 993; 10051; 2305; 1763; 286826; 4751; 9212; 84296; 1058; 10926; 7316; 4172; 995; 55143; 983; 898; 1063; 147841; 51512; 22974; 84515; 6790; 83540; 5985; 5424; 5426; 9126; 54892; 894; 220134; 23649; 91687; 23225; 64151; 81620; 7514; 151648; 9700; 8318; 10112; 55920; 1029; 79980; 699; 23354; 4171; 9702; 157570; 57405; 890; 11130; 4175; 23194; 5885;…	481	480
Retinoblastoma Gene in Cancer	9.09062e-13	4.3385e-10	Wikipathways	WP2446	DNMT1; STMN1; RFC5; RFC4; POLE; CDC7; TTK; CCNA2; SMC3; CCNE1; CDT1; KIF4A; FANCG; CHEK1; CDC25A; ORC1; MCM7; MCM6; MCM3; CCNB2; E2F1; RBBP7; CDK1; CDC45; HLTF; TOP2A	3925; 1786; 5984; 5985; 993; 6596; 983; 81620; 24137; 7272; 9126; 7153; 9133; 1869; 2189; 4175; 4176; 4172; 5426; 1111; 890; 898; 8317; 8318; 4998; 5931	89	89
Activation of ATR in response to replication stress	2.66149e-11	8.67117e-09	Reactome	R-HSA-176187	MCM10; CDC25C; RFC4; CDC25A; RFC5; ORC1; MCM7; MCM6; DBF4; MCM2; MCM8; CDC45; MCM3; CDC7; RAD9A; CHEK1	995; 10926; 4175; 55388; 8317; 1111; 993; 84515; 5985; 5883; 4998; 4171; 5984; 4172; 8318; 4176	37	37
DNA Replication	2.72536e-11	8.67117e-09	Reactome	R-HSA-69306	POLA2; RFC5; RFC4; POLE; FEN1; CDC7; DNA2; CCNA2; CCNE1; CDT1; POLD1; MCM10; ORC1; MCM7; MCM6; MCM3; MCM2; MCM8; GINS1; GINS4; DBF4; UBC; CDC45	81620; 1763; 4998; 5426; 4175; 55388; 8317; 5985; 4176; 4172; 898; 7316; 84515; 23649; 10926; 5424; 4171; 2237; 84296; 5984; 890; 9837; 8318	80	80
Cell cycle - Homo sapiens (human)	1.09248e-10	2.97935e-08	KEGG	path:hsa04110	TGFB3; MAD2L1; CDC7; CCNA2; SMC3; CCNE1; TTK; ESPL1; CHEK2; CHEK1; CDKN2A; BUB1; RAD21; CDC25C; CDC25A; ORC1; MCM7; MCM6; MCM3; MCM2; CCNB2; E2F1; CCND2; CDC20; CDK1; DBF4; CDC45; CREBBP	1029; 4171; 4172; 1387; 4175; 4176; 4998; 1111; 7272; 8317; 8318; 10926; 699; 5885; 898; 1869; 890; 894; 7043; 9126; 9133; 11200; 983; 991; 993; 995; 9700; 4085	124	124
Resolution of Sister Chromatid Cohesion	1.39661e-10	3.33266e-08	Reactome	R-HSA-2500257	MAD2L1; ZWINT; NUF2; DSN1; KIF2C; XPO1; SMC3; RAD21; SKA1; AURKB; CDCA5; CDCA8; CENPO; CENPL; BUB1; NUP107; CENPF; CENPA; ZWILCH; CCNB2; RCC2; SGO1; CDC20; CDK1; SPC25; SPC24	55143; 983; 9212; 1063; 57405; 57122; 11130; 147841; 4085; 5885; 55055; 9133; 7514; 151648; 220134; 83540; 55920; 11004; 991; 1058; 9126; 79980; 699; 113130; 91687; 79172	109	109
S Phase	2.12108e-10	4.49905e-08	Reactome	R-HSA-69242	POLA2; RFC5; RFC4; POLE; FEN1; DNA2; CCNA2; ESCO2; SMC3; CCNE1; CDT1; POLD1; CDCA5; RAD21; CDC25A; ORC1; MCM7; MCM6; MCM3; MCM2; MCM8; GINS1; GINS4; UBC; CDC45	898; 23649; 890; 81620; 4175; 5426; 5885; 4998; 84515; 993; 9837; 8318; 4171; 1763; 5985; 5424; 84296; 9126; 4176; 157570; 113130; 7316; 2237; 5984; 4172	103	103
DNA Replication	2.65453e-10	5.06749e-08	Wikipathways	WP466	POLA2; MCM10; POLD1; RFC5; RFC4; CDT1; ORC1; MCM7; MCM6; POLE; MCM3; MCM2; UBC; CDC45; DBF4; CDC7	7316; 23649; 5426; 5984; 5985; 81620; 55388; 8317; 8318; 4175; 4176; 4171; 4172; 5424; 10926; 4998	42	42
DNA strand elongation	3.92141e-10	6.80543e-08	Reactome	R-HSA-69190	POLA2; DNA2; GINS4; POLD1; RFC5; RFC4; MCM7; MCM6; GINS1; FEN1; MCM2; CDC45; MCM3; MCM8	1763; 4175; 23649; 84515; 5985; 5424; 2237; 84296; 5984; 4172; 9837; 8318; 4176; 4171	32	32
Cell Cycle	1.31741e-09	2.09578e-07	Wikipathways	WP179	TGFB3; CDC7; CCNA2; SMC3; CCNE1; TTK; ESPL1; CHEK2; CHEK1; CDKN2A; BUB1; RAD21; CDC25C; CDC25A; ORC1; MCM7; MCM6; MCM3; MCM2; CCNB2; E2F1; CCND2; CDC20; CDK1; DBF4; CDC45	699; 995; 991; 993; 7043; 9700; 983; 11200; 9126; 9133; 7272; 1869; 4175; 4176; 4171; 4172; 1029; 10926; 5885; 1111; 890; 894; 898; 8317; 8318; 4998	120	120
Synthesis of DNA	2.33488e-09	3.42869e-07	Reactome	R-HSA-69239	POLA2; DNA2; CCNA2; GINS4; POLD1; RFC5; RFC4; CCNE1; CDT1; ORC1; MCM7; MCM6; POLE; GINS1; MCM3; MCM2; UBC; CDC45; FEN1; MCM8	81620; 1763; 4175; 5985; 4176; 4172; 898; 7316; 84515; 23649; 4998; 5424; 5426; 4171; 2237; 84296; 5984; 890; 9837; 8318	75	75
DNA Replication Pre-Initiation	3.92452e-09	4.99461e-07	Reactome	R-HSA-69002	POLA2; MCM10; CDT1; ORC1; MCM7; MCM6; POLE; DBF4; MCM2; UBC; CDC45; MCM3; MCM8; CDC7	81620; 10926; 4175; 5426; 55388; 8317; 7316; 84515; 23649; 4998; 4172; 8318; 4176; 4171	37	37
M/G1 Transition	3.92452e-09	4.99461e-07	Reactome	R-HSA-68874	POLA2; MCM10; CDT1; ORC1; MCM7; MCM6; POLE; DBF4; MCM2; UBC; CDC45; MCM3; MCM8; CDC7	81620; 10926; 4175; 5426; 55388; 8317; 7316; 84515; 23649; 4998; 4172; 8318; 4176; 4171	37	37
G2/M Checkpoints	5.36882e-09	6.40568e-07	Reactome	R-HSA-69481	RFC5; RFC4; RAD9A; CDC7; DNA2; CHEK2; CHEK1; MCM10; CDC25C; MRE11; CDC25A; ORC1; BLM; MCM6; MCM7; MCM2; MCM8; CCNB2; TOPBP1; GTSE1; CDK1; DBF4; CDC45; MCM3; NSD2	995; 55388; 983; 5883; 4175; 51512; 9133; 84515; 993; 8318; 4171; 1763; 8317; 5985; 641; 4176; 10926; 1111; 11073; 11200; 7468; 4998; 5984; 4172; 4361	120	119
Separation of Sister Chromatids	6.70563e-09	7.53003e-07	Reactome	R-HSA-2467813	MAD2L1; ZWINT; NUF2; DSN1; KIF2C; XPO1; SMC3; RAD21; SKA1; ESPL1; AURKB; CDCA5; CDCA8; CENPO; CENPL; BUB1; NUP107; CENPF; CENPA; ZWILCH; RCC2; SGO1; CDC20; UBC; SPC25; SPC24	55143; 9212; 91687; 57122; 57405; 11130; 147841; 4085; 5885; 55055; 7514; 151648; 9700; 83540; 55920; 11004; 991; 220134; 1058; 9126; 79980; 699; 113130; 7316; 1063; 79172	129	129
Mitotic Prometaphase	7.70489e-09	7.61112e-07	Reactome	R-HSA-68877	MAD2L1; HAUS5; ZWINT; NUF2; DSN1; KIF2C; XPO1; NEK2; HAUS6; SMC3; RAD21; SMC4; SKA1; AURKB; CEP57; CDCA8; CENPO; CENPL; BUB1; NUP107; CENPF; CDCA5; CENPA; ZWILCH; CCNB2; RCC2; SGO1; CDC20; CDK1; NCAPG; SPC25; SPC24	55143; 54801; 983; 9702; 9212; 1063; 64151; 57122; 57405; 11130; 147841; 4085; 5885; 55055; 9133; 7514; 151648; 83540; 55920; 991; 11004; 10051; 220134; 1058; 9126; 79980; 699; 4751; 23354; 113130; 91687; 79172	186	186
Mitotic G1-G1/S phases	7.79006e-09	7.61112e-07	Reactome	R-HSA-453279	POLA2; POLE; CDKN2A; CDC7; CCNA2; CCNE1; CDT1; TOP2A; MCM10; CDC25A; ORC1; MCM7; MCM6; MCM3; MCM2; MCM8; E2F1; LIN9; CCND2; CDK1; DBF4; UBC; CDC45	55388; 983; 898; 1869; 890; 81620; 4175; 5426; 4998; 84515; 993; 8318; 7153; 4171; 8317; 286826; 1029; 4176; 10926; 23649; 7316; 4172; 894	104	104
Activation of the pre-replicative complex	7.97393e-09	7.61112e-07	Reactome	R-HSA-68962	POLA2; MCM10; CDT1; ORC1; MCM7; MCM6; POLE; DBF4; MCM2; CDC45; MCM3; MCM8; CDC7	81620; 10926; 4175; 5426; 55388; 8317; 84515; 23649; 4998; 4172; 8318; 4176; 4171	33	33
G1/S Transition	1.87311e-08	1.70274e-06	Reactome	R-HSA-69206	POLA2; MCM10; CCNA2; E2F1; CDK1; CDC25A; CCNE1; CDT1; ORC1; MCM7; MCM6; POLE; DBF4; MCM2; UBC; CDC45; MCM3; MCM8; CDC7	81620; 8318; 5426; 4175; 55388; 8317; 983; 898; 1869; 993; 23649; 7316; 84515; 10926; 4998; 4176; 890; 4172; 4171	76	76
FOXM1 transcription factor network	2.625e-08	2.27779e-06	PID	foxm1pathway	CCNB2; CDKN2A; LAMA4; FOS; CENPF; CCNE1; CENPA; CDK1; FOXM1; AURKB; NEK2; CHEK2; CCNA2; CREBBP	3910; 1387; 983; 9133; 9212; 898; 11200; 4751; 2353; 1063; 1058; 890; 2305; 1029	42	42
Unwinding of DNA	3.32583e-08	2.76044e-06	Reactome	R-HSA-176974	GINS1; GINS4; MCM7; MCM6; MCM3; MCM2; CDC45; MCM8	84515; 4175; 4172; 9837; 8318; 4176; 4171; 84296	12	12
Mitotic Anaphase	3.96607e-08	3.13635e-06	Reactome	R-HSA-68882	MAD2L1; ZWINT; NUF2; DSN1; KIF2C; XPO1; SMC3; RAD21; SKA1; ESPL1; AURKB; CDCA5; CDCA8; CENPO; CENPL; BUB1; NUP107; CENPF; CENPA; ZWILCH; RCC2; SGO1; CDC20; UBC; SPC25; SPC24	55143; 9212; 91687; 57122; 57405; 11130; 147841; 4085; 5885; 55055; 7514; 151648; 9700; 83540; 55920; 11004; 991; 220134; 1058; 9126; 79980; 699; 113130; 7316; 1063; 79172	140	140
Amplification of signal from unattached kinetochores via a MAD2 inhibitory signal	4.27161e-08	3.13635e-06	Reactome	R-HSA-141444	XPO1; CENPO; RCC2; MAD2L1; BUB1; NUP107; ZWINT; SGO1; NUF2; DSN1; CENPA; CDC20; SKA1; CENPL; KIF2C; AURKB; CENPF; ZWILCH; CDCA8; SPC25; SPC24	55143; 9212; 1063; 57405; 57122; 11130; 147841; 4085; 55055; 7514; 151648; 220134; 83540; 55920; 991; 11004; 1058; 79980; 699; 91687; 79172	96	96
Amplification of signal from the kinetochores	4.27161e-08	3.13635e-06	Reactome	R-HSA-141424	XPO1; CENPO; RCC2; MAD2L1; BUB1; NUP107; ZWINT; SGO1; NUF2; DSN1; CENPA; CDC20; SKA1; CENPL; KIF2C; AURKB; CENPF; ZWILCH; CDCA8; SPC25; SPC24	55143; 9212; 1063; 57405; 57122; 11130; 147841; 4085; 55055; 7514; 151648; 220134; 83540; 55920; 991; 11004; 1058; 79980; 699; 91687; 79172	96	96
Mitotic Metaphase and Anaphase	4.61414e-08	3.26237e-06	Reactome	R-HSA-2555396	MAD2L1; ZWINT; NUF2; DSN1; KIF2C; XPO1; SMC3; RAD21; SKA1; ESPL1; AURKB; CDCA5; CDCA8; CENPO; CENPL; BUB1; NUP107; CENPF; CENPA; ZWILCH; RCC2; SGO1; CDC20; UBC; SPC25; SPC24	55143; 9212; 91687; 57122; 57405; 11130; 147841; 4085; 5885; 55055; 7514; 151648; 9700; 83540; 55920; 11004; 991; 220134; 1058; 9126; 79980; 699; 113130; 7316; 1063; 79172	141	141
RHO GTPases Activate Formins	4.92888e-08	3.36044e-06	Reactome	R-HSA-5663220	MAD2L1; ZWINT; DSN1; RHOB; KIF2C; XPO1; NUF2; SKA1; DVL3; AURKB; CDCA8; CENPO; CENPL; BUB1; NUP107; CENPF; CENPA; ZWILCH; RCC2; SGO1; CDC20; ACTB; SPC25; SPC24	55143; 9212; 1063; 57405; 57122; 11130; 147841; 4085; 388; 55055; 7514; 60; 83540; 55920; 11004; 991; 220134; 1058; 79980; 699; 1857; 91687; 79172; 151648	123	123
Transcriptional Regulation by TP53	7.36822e-08	4.85032e-06	Reactome	R-HSA-3700989	LRPPRC; RFC5; RFC4; USP2; ERCC3; MSH2; USP7; CASP10; ELOB; MAPK11; TNRC6A; TSC2; RARA; TPX2; DNA2; CCNA2; BTG2; FAS; CCNE1; JUN; SGK1; AURKA; AURKB; CHEK2; RAD9A; CHEK1; CDKN2A; FOS; CDC25C; MRE11; CNOT10; BLM; POLR2D; ING2; E2F7; TOPBP1; E2F1; PIP4K2A; TBP; RBBP7; E2F8; CDK1; FANCD2; UBC; PDPK1; RHEB; CREBBP	1869; 9099; 2071; 3622; 7832; 7316; 11200; 7874; 4436; 995; 6446; 983; 898; 5883; 22974; 2353; 6790; 5433; 27327; 10128; 25904; 11073; 5985; 4361; 3725; 9212; 6009; 1387; 2177; 1029; 1111; 5914; 5305; 890; 355; 7249; 5931; 1763; 79733; 6908; 6923; 5600; 641; 144455; 5170; 5984; 843	374	371
Aurora B signaling	1.62584e-07	1.03458e-05	PID	aurora_b_pathway	BUB1; RACGAP1; SGO1; SMC4; KIF23; AURKA; AURKB; NCAPG; STMN1; CDCA8; CENPA; KIF2C; KIF20A	10112; 699; 55143; 9493; 9212; 10051; 6790; 11004; 151648; 64151; 1058; 3925; 29127	41	41
Gastric Cancer Network 1	1.83023e-07	1.12707e-05	Wikipathways	WP2361	E2F7; TPX2; RUVBL1; LIN9; ECT2; NUP107; CENPF; KIF15; ACTL6A; AURKA; TOP2A	56992; 8607; 1894; 86; 22974; 7153; 144455; 57122; 6790; 1063; 286826	29	29
DNA replication - Homo sapiens (human)	2.63161e-07	1.56992e-05	KEGG	path:hsa03030	POLA2; DNA2; MCM6; RFC5; RFC4; RNASEH1; MCM7; POLD1; POLE; FEN1; MCM2; MCM3	5424; 5426; 2237; 5985; 4175; 4171; 4172; 4176; 246243; 5984; 23649; 1763	36	36
ATR signaling pathway	3.70106e-07	2.14101e-05	PID	atr_pathway	CCNA2; TOPBP1; TIPIN; CDC25C; RFC4; CDC25A; MCM7; RFC5; MCM2; FANCD2; RAD9A; CHEK1	1111; 11073; 993; 995; 5985; 5883; 54962; 5984; 890; 2177; 4176; 4171	37	37
Mitotic G1-G1-S phases	4.32357e-07	2.42756e-05	Wikipathways	WP1858	CCNA2; E2F1; CDC25A; CCNE1; CDT1; ORC1; CDK1; CDC45; TOP2A	890; 993; 898; 983; 7153; 1869; 81620; 8318; 4998	20	20
Mitotic Spindle Checkpoint	7.89078e-07	4.30385e-05	Reactome	R-HSA-69618	XPO1; CENPO; RCC2; MAD2L1; BUB1; NUP107; ZWINT; SGO1; NUF2; DSN1; CENPA; CDC20; SKA1; CENPL; KIF2C; AURKB; CENPF; ZWILCH; CDCA8; SPC25; SPC24	55143; 9212; 1063; 57405; 57122; 11130; 147841; 4085; 55055; 7514; 151648; 83540; 55920; 11004; 991; 220134; 1058; 79980; 699; 91687; 79172	113	113
DNA Double-Strand Break Repair	1.44071e-06	7.43548e-05	Reactome	R-HSA-5693532	POLQ; RFC5; RFC4; RAD9A; GEN1; POLE; FEN1; DCLRE1C; DNA2; CCNA2; SLX4; TIPIN; RAD51AP1; CHEK2; POLD1; CHEK1; MRE11; PARP1; PAXIP1; BLM; UBE2I; TOPBP1; KPNA2; UBC; NSD2; EME1	5984; 5883; 890; 3838; 7316; 5426; 22976; 7468; 10635; 10721; 1763; 54962; 7329; 146956; 348654; 5985; 5424; 641; 64421; 84464; 1111; 11200; 2237; 142; 11073; 4361	169	167
G1 to S cell cycle control	1.44114e-06	7.43548e-05	Wikipathways	WP45	POLA2; CCNE1; E2F1; MCM6; CDC25A; CCND2; CDKN2A; ORC1; MCM7; CDK1; POLE; CREB3L1; MCM3; MCM2; CDC45	23649; 983; 993; 4176; 90993; 894; 898; 1869; 8318; 4171; 4175; 4172; 5426; 1029; 4998	64	64
Signaling by Rho GTPases	2.30953e-06	0.000116023	Reactome	R-HSA-194315	MYH11; MAD2L1; MYH14; KDM1A; ZWINT; DSN1; STARD13; AKAP13; ZWILCH; BUB1; ARHGAP6; IQGAP2; IQGAP3; XPO1; ARHGEF5; ECT2; RACGAP1; NUF2; SKA1; DVL3; ARHGDIB; KIF2C; AURKB; ARHGAP24; CDCA8; CENPO; CENPL; FGD1; ARHGEF15; NUP107; CDC25C; CENPF; CENPA; ARHGEF39; RHOJ; RHOB; DEPDC1B; RCC2; RASGRF2; SGO1; CDC20; ARHGAP17; STARD8; ARHGAP11A; PDPK1; ACTB; SPC25; SPC24	57122; 4085; 55114; 55055; 1058; 4629; 29127; 995; 55143; 1063; 147841; 9824; 60; 83540; 397; 83478; 10788; 2245; 79784; 9212; 91687; 388; 5924; 22899; 7514; 151648; 57381; 55920; 220134; 7984; 79980; 699; 11214; 9754; 57405; 11130; 1894; 395; 23028; 90627; 11004; 991; 55789; 5170; 128239; 1857; 84904; 79172	435	430
Regulation of TP53 Activity	2.69742e-06	0.000132035	Reactome	R-HSA-5633007	RFC5; RFC4; USP2; USP7; MAPK11; PIP4K2A; TPX2; DNA2; CCNA2; AURKA; AURKB; CHEK2; RAD9A; CHEK1; CDKN2A; MRE11; BLM; ING2; TOPBP1; SGK1; TBP; RBBP7; CDK1; UBC; PDPK1	1763; 983; 22974; 9212; 890; 9099; 6790; 5931; 3622; 6446; 6908; 5305; 5985; 5600; 641; 1029; 5170; 1111; 5883; 7316; 11200; 5984; 11073; 7874; 4361	162	162
HDR through Homologous Recombination (HRR)	3.26178e-06	0.000155669	Reactome	R-HSA-5685942	DNA2; SLX4; TOPBP1; POLD1; RFC5; MRE11; RAD9A; RFC4; GEN1; BLM; RAD51AP1; POLE; UBC; EME1; CHEK1	1763; 5426; 1111; 11073; 146956; 10635; 7316; 348654; 5985; 5883; 5424; 4361; 5984; 641; 84464	69	68
DNA Repair	5.0899e-06	0.000236991	Reactome	R-HSA-73894	POLQ; RFC5; RFC4; MSH2; ERCC3; CHEK1; GEN1; POLE; FEN1; FANCD2; DCLRE1B; DCLRE1C; DNA2; CCNA2; SLX4; TIPIN; RAD51AP1; FANCG; POLD1; CHEK2; RAD9A; KPNA2; MRE11; PARP1; PAXIP1; BLM; POLR2D; RUVBL1; USP7; UBE2I; MPG; TOPBP1; ACTL6A; ISY1; UBC; ACTB; NSD2; EME1	4436; 2189; 4350; 57461; 86; 5984; 890; 641; 11200; 54962; 5985; 3838; 7468; 2071; 64858; 10721; 5433; 60; 1763; 7329; 146956; 348654; 5424; 2177; 11073; 84464; 5426; 8607; 64421; 1111; 10635; 5883; 7316; 22976; 2237; 142; 7874; 4361	320	317
Assembly of the pre-replicative complex	5.69816e-06	0.000258995	Reactome	R-HSA-68867	CDT1; ORC1; MCM7; MCM6; MCM3; MCM2; UBC; MCM8	81620; 84515; 4175; 4172; 4998; 4176; 7316; 4171	20	20
Orc1 removal from chromatin	5.96151e-06	0.000264663	Reactome	R-HSA-68949	CCNA2; CDT1; ORC1; MCM7; MCM6; MCM3; MCM2; UBC; MCM8	81620; 4175; 7316; 84515; 4998; 890; 4172; 4176; 4171	26	26
Homology Directed Repair	6.99157e-06	0.000303339	Reactome	R-HSA-5693538	POLQ; RFC5; RFC4; RAD9A; GEN1; POLE; FEN1; DNA2; CCNA2; SLX4; TIPIN; RAD51AP1; POLD1; CHEK1; MRE11; PARP1; BLM; UBE2I; TOPBP1; UBC; NSD2; EME1	5883; 890; 7316; 5426; 10635; 10721; 1763; 54962; 7329; 146956; 348654; 5985; 5424; 641; 84464; 1111; 7468; 2237; 142; 5984; 11073; 4361	141	139
DNA Damage Response	1.60936e-05	0.000672151	Wikipathways	WP707	CCNB2; CCNE1; E2F1; CDC25C; MRE11; RAD9A; CCND2; CASP8; CDK1; FANCD2; FAS; CHEK2; CDC25A; CHEK1	983; 5883; 11200; 4361; 1111; 2177; 995; 894; 993; 898; 9133; 1869; 841; 355	68	68
Generic Transcription Pathway	1.61964e-05	0.000672151	Reactome	R-HSA-212436	LRPPRC; RAD9A; CASP10; TNRC6A; RARA; TPX2; STUB1; ZNF786; ZNF263; MED14; ZNF662; PIP4K2A; CDKN2A; ZNF419; NR2C1; RSPO3; PCGF6; ZNF282; CCND2; RBBP7; YEATS4; MAF; ZNF37A; ZNF213; ZNF212; ITGA5; DEK; ZNF597; EED; CCNE1; JUN; NR5A2; ZNF764; CHEK2; CLDN5; CHEK1; FOS; CDC25C; MRE11; CNOT10; PARP1; BLM; POLR2D; ING2; UBE2I; TBP; ATAD2; ZNF703; ZNF112; CREBBP; HDAC6; RFC5; RFC4; ELOB; MAPK11; FANCD2; TS…	1876; 54925; 1869; 27327; 2071; 9099; 4855; 3622; 7122; 7832; 9212; 10013; 4094; 11073; 4005; 5931; 8089; 2494; 57335; 7316; 11200; 5433; 7874; 4436; 995; 983; 898; 10127; 5883; 9440; 182; 22974; 2353; 10432; 6790; 7913; 7988; 6446; 84108; 10128; 7587; 25904; 23462; 9572; 5985; 57541; 389114; 894; 4361; 3725; 146434; 7760; 8427; 79744; 7329; 25888; 7771; 10273; 80139; 2177; 92595; 1029; 1387; 111…	1107	1099
Activation of E2F1 target genes at G1/S	1.79211e-05	0.000712738	Reactome	R-HSA-539107	E2F1; CDC25A; CCNE1; CDT1; ORC1; CDK1; CDC45	81620; 4998; 1869; 8318; 898; 983; 993	17	17
G1/S-Specific Transcription	1.79211e-05	0.000712738	Reactome	R-HSA-69205	E2F1; CDC25A; CCNE1; CDT1; ORC1; CDK1; CDC45	81620; 4998; 1869; 8318; 898; 983; 993	17	17
Cellular senescence - Homo sapiens (human)	2.20711e-05	0.00085987	KEGG	path:hsa04218	TGFB3; RAD9A; RRAS; FOXO1; FOXM1; MAPK11; TSC2; CCNA2; CCNE1; PIK3R1; CHEK2; CHEK1; TGFBR2; CDKN2A; MRE11; CDC25A; ITPR1; CCNB2; LIN9; E2F1; CCND2; CDK1; RHEB	1029; 2305; 5883; 7249; 1111; 6237; 286826; 3708; 5295; 2308; 4361; 1869; 898; 6009; 890; 894; 7043; 7048; 9133; 11200; 983; 5600; 993	160	160
M Phase	2.39385e-05	0.000913973	Reactome	R-HSA-68886	MAD2L1; HAUS5; ZWINT; NUF2; DSN1; NCAPG2; KIF2C; XPO1; NEK2; HAUS6; SMC3; RAD21; SMC4; SKA1; ESPL1; AURKB; CEP57; CDCA8; NUP210; CENPO; CENPL; BUB1; NUP107; CENPF; CDCA5; CENPA; ZWILCH; CCNB2; RCC2; SGO1; KIF23; CDC20; CDK1; UBC; NCAPG; KIF20A; SPC25; SPC24	54801; 983; 9212; 55143; 64151; 57122; 57405; 11130; 147841; 4085; 5885; 9493; 23225; 9133; 55055; 7514; 4751; 10051; 151648; 9700; 220134; 83540; 10112; 55920; 1063; 79980; 991; 11004; 1058; 9702; 9126; 54892; 699; 23354; 113130; 7316; 91687; 79172	340	339
miRNA Regulation of DNA Damage Response	2.47459e-05	0.000926272	Wikipathways	WP1530	CCNB2; CCNE1; E2F1; CDC25C; MRE11; CDC25A; CCND2; CASP8; MCM7; CDK1; MIR17HG; FANCD2; FAS; CHEK2; RAD9A; CHEK1	407975; 995; 993; 983; 11200; 2177; 9133; 1869; 4176; 841; 4361; 5883; 1111; 894; 898; 355	89	89
cdk regulation of dna replication	2.79352e-05	0.00102554	BioCarta	mcmpathway	CCNE1; CDT1; ORC1; MCM7; MCM6; MCM3; MCM2	81620; 4175; 4172; 4998; 4176; 4171; 898	18	18
Regulation of TP53 Activity through Phosphorylation	4.34562e-05	0.00156524	Reactome	R-HSA-6804756	TPX2; DNA2; CCNA2; TOPBP1; RFC5; TBP; RAD9A; RFC4; BLM; AURKA; AURKB; UBC; CHEK1; CHEK2; MRE11; MAPK11	9212; 5883; 890; 22974; 6790; 1763; 6908; 5985; 5600; 641; 1111; 11073; 7316; 11200; 5984; 4361	93	93
Gene expression (Transcription)	5.56584e-05	0.00196763	Reactome	R-HSA-74160	LRPPRC; NCBP2; RAD9A; CASP10; POLR3E; TNRC6A; RARA; TPX2; ZNF703; DNMT1; ZNF786; ZNF263; MED14; ZNF473; PIP4K2A; CDKN2A; AURKB; NR2C1; RSPO3; PCGF6; CD3EAP; ZNF282; CCND2; RBBP7; YEATS4; UBC; ACTB; ZNF37A; ZNF213; ZNF212; ITGA5; DEK; ZNF597; EED; CCNE1; JUN; NR5A2; ZNF764; CHEK2; CLDN5; CHEK1; FOS; CDC25C; MRE11; CNOT10; PARP1; BLM; POLR2D; ING2; UBE2I; ZC3H8; TBP; ATAD2; STUB1; MAF; ZNF112; CREB…	22936; 7122; 4094; 7874; 995; 6790; 7913; 7988; 6446; 10128; 25904; 7978; 7019; 79101; 1029; 1387; 8427; 2146; 890; 84524; 5600; 57122; 3622; 4005; 8089; 7316; 5433; 84108; 22974; 5985; 142; 4361; 23168; 23225; 25888; 92595; 10013; 86; 1786; 79733; 8317; 641; 29028; 8726; 84870; 348327; 5984; 1876; 1869; 9099; 7832; 57335; 11200; 4436; 983; 10127; 10849; 2353; 27327; 1788; 23462; 9572; 389114; 89…	1373	1364
Pathways in cancer - Homo sapiens (human)	5.70017e-05	0.00197848	KEGG	path:hsa05200	PDGFRB; TGFB3; PDGFA; MSH2; MGST2; FOXO1; IGF1; ELOB; IFNGR1; EDNRA; FLT4; EDNRB; RARA; HEYL; FZD4; IL7; MECOM; FAS; CCNE1; JUN; GNG11; PTGER3; DVL3; PIK3R1; CXCR4; JAG1; DAPK2; TGFBR2; CDKN2A; LAMA4; IL4R; FOS; DLL4; VEGFC; RASGRP3; HEY1; ADCY4; EPAS1; BMP4; E2F1; ADCY3; NOTCH4; CCND2; ADCY9; CASP8; F2R; PTGER4; IL3RA; WNT5A; LPAR1; CREBBP	196883; 2122; 2149; 109; 115; 8322; 4258; 182; 2308; 2324; 2353; 4436; 355; 652; 2791; 4855; 6923; 841; 894; 898; 7043; 7048; 23462; 1029; 5154; 5159; 23604; 5295; 25780; 7424; 54567; 7474; 1387; 3459; 3479; 3563; 3566; 3574; 5733; 5734; 3725; 7852; 5914; 1857; 3910; 1869; 1902; 1909; 1910; 26508; 2034	526	526
ATM pathway	6.72293e-05	0.0022918	PID	atm_pathway	CDC25C; MRE11; CDC25A; BLM; RAD9A; FANCD2; SMC3; CHEK2; DCLRE1C	995; 64421; 993; 11200; 5883; 2177; 641; 9126; 4361	34	34
Fluid shear stress and atherosclerosis - Homo sapiens (human)	7.36005e-05	0.00246497	KEGG	path:hsa05418	PDGFA; ACVR2B; BMP4; PECAM1; CAV2; MGST2; FOS; JUN; MAP3K5; MEF2C; MAPK11; KLF2; PIK3R1; CDH5; ACTB; PLAT; DUSP1; THBD; IL1R1; CAV1	5154; 5175; 60; 93; 4208; 4217; 10365; 652; 3725; 4258; 5295; 2353; 1843; 857; 858; 5327; 7056; 5600; 3554; 1003	139	139
TP53 Regulates Transcription of Cell Cycle Genes	8.28396e-05	0.00272657	Reactome	R-HSA-6791312	RARA; E2F7; CNOT10; CCNA2; BTG2; E2F1; CDC25C; CCNE1; E2F8; CDK1; AURKA	995; 5914; 898; 983; 79733; 1869; 6790; 7832; 25904; 890; 144455	51	51
Regulation of sister chromatid separation at the metaphase-anaphase transition	8.93652e-05	0.0028915	Wikipathways	WP4240	MAD2L1; BUB1; RAD21; SMC3; CDC20; ESPL1	991; 4085; 9126; 699; 5885; 9700	15	15
PLK1 signaling events	0.000108955	0.0034198	PID	plk1_pathway	TPX2; BUB1; ECT2; CDC25C; SGO1; CDC20; CDK1; AURKA; SPC24; KIF20A	10112; 699; 983; 1894; 22974; 995; 991; 6790; 151648; 147841	44	44
Regulation of TP53 Degradation	0.000109276	0.0034198	Reactome	R-HSA-6804757	CDKN2A; CCNA2; SGK1; USP2; USP7; CDK1; UBC; PDPK1; CHEK2	6446; 5170; 983; 1029; 7316; 11200; 9099; 890; 7874	36	36
HDR through Homologous Recombination (HR) or Single Strand Annealing (SSA)	0.000121925	0.00375411	Reactome	R-HSA-5693567	UBE2I; DNA2; CCNA2; SLX4; TOPBP1; TIPIN; RFC5; RFC4; RAD9A; GEN1; BLM; RAD51AP1; POLE; MRE11; UBC; NSD2; EME1; POLD1; CHEK1	5883; 890; 7316; 5426; 10635; 1763; 54962; 7329; 146956; 348654; 5985; 5424; 641; 84464; 1111; 7468; 5984; 11073; 4361	135	133
p53 signaling pathway - Homo sapiens (human)	0.000134438	0.00403595	KEGG	path:hsa04115	GTSE1; CCNB2; CDKN2A; SHISA5; FAS; CCNE1; CASP8; CDK1; IGF1; TSC2; CCND2; CHEK2; CHEK1	1029; 983; 898; 51246; 3479; 355; 9133; 11200; 841; 51512; 1111; 7249; 894	72	72
Polo-like kinase mediated events	0.000136344	0.00403595	Reactome	R-HSA-156711	CCNB2; LIN9; CDC25C; CENPF; CDC25A; FOXM1	995; 2305; 9133; 1063; 286826; 993	16	16
Regulation of TP53 Expression and Degradation	0.000137421	0.00403595	Reactome	R-HSA-6806003	CDKN2A; CCNA2; SGK1; USP2; USP7; CDK1; UBC; PDPK1; CHEK2	6446; 5170; 983; 1029; 7316; 11200; 9099; 890; 7874	37	37
RNA Polymerase II Transcription	0.000152623	0.00441452	Reactome	R-HSA-73857	LRPPRC; NCBP2; RAD9A; CASP10; TNRC6A; RARA; TPX2; STUB1; ZNF786; ZNF263; MED14; ZNF662; PIP4K2A; CDKN2A; ZNF419; NR2C1; RSPO3; PCGF6; ZNF282; CCND2; RBBP7; YEATS4; MAF; ZNF37A; ZNF213; ZNF212; ITGA5; DEK; ZNF597; EED; CCNE1; JUN; NR5A2; ZNF764; CHEK2; CLDN5; CHEK1; FOS; CDC25C; MRE11; CNOT10; PARP1; BLM; POLR2D; ING2; UBE2I; ZC3H8; TBP; ATAD2; ZNF703; ZNF112; CREBBP; HDAC6; RFC5; RFC4; ELOB; MAPK…	1876; 54925; 1869; 22936; 10127; 27327; 9099; 4855; 2071; 3622; 7122; 7832; 9212; 4094; 11073; 348327; 4005; 5931; 8089; 2494; 57335; 7316; 11200; 5433; 7874; 4436; 995; 983; 898; 5883; 9440; 182; 22974; 2353; 10432; 6790; 7913; 7988; 7760; 6446; 84108; 10128; 7587; 25904; 23462; 9572; 5985; 57541; 142; 389114; 894; 4361; 23168; 3725; 6009; 146434; 22916; 8427; 10273; 10013; 79744; 7329; 25888; 7…	1236	1228
Extension of Telomeres	0.000161927	0.00448153	Reactome	R-HSA-180786	POLA2; DNA2; RUVBL1; RFC5; RFC4; POLD1; POLE; FEN1	1763; 5426; 23649; 5985; 5424; 2237; 5984; 8607	30	30
ATM Signaling Network in Development and Disease	0.000161983	0.00448153	Wikipathways	WP3878	TSC2; BUB1; MRE11; RNF40; CDK1; AURKB; MAP3K5; CHEK2; DCLRE1C; CHEK1	4361; 983; 11200; 7249; 1111; 9212; 699; 9810; 4217; 64421	46	46
Switching of origins to a post-replicative state	0.000161983	0.00448153	Reactome	R-HSA-69052	CCNA2; CCNE1; CDT1; ORC1; MCM7; MCM6; MCM3; MCM2; UBC; MCM8	81620; 4175; 898; 7316; 84515; 4998; 890; 4172; 4176; 4171	46	46
G1/S DNA Damage Checkpoints	0.000168904	0.00460624	Reactome	R-HSA-69615	CDKN2A; CCNA2; CDC25A; CCNE1; UBC; CHEK2; CHEK1	1111; 993; 7316; 11200; 890; 1029; 898	23	23
Human T-cell leukemia virus 1 infection - Homo sapiens (human)	0.000181622	0.00488334	KEGG	path:hsa05166	TGFB3; MAD2L1; IL1R1; XPO1; CCNA2; CCNE1; JUN; ESPL1; PIK3R1; MSX1; CHEK2; CHEK1; TGFBR2; CDKN2A; FOS; ADCY4; CCNB2; E2F1; ADCY3; TBP; CCND2; ADCY9; CDC20; ZFP36; CREB3L1; CREBBP	1029; 1111; 90993; 109; 115; 3725; 5295; 3554; 6908; 196883; 2353; 1869; 7514; 1387; 7538; 890; 894; 898; 7043; 4487; 7048; 9133; 11200; 991; 9700; 4085	219	219
E2F transcription factor network	0.000206117	0.00546497	PID	e2f_pathway	E2F7; E2F6; CDKN2A; CCNA2; HIC1; E2F1; CDC25A; CCNE1; ORC1; CDK1; MCM3; TOPBP1; CREBBP	1876; 3090; 1387; 983; 993; 4998; 1869; 890; 4172; 11073; 144455; 1029; 898	75	75
Mitotic G2-G2/M phases	0.000219819	0.00574842	Reactome	R-HSA-453274	XPO1; CCNB2; TPX2; HAUS5; CCNA2; LIN9; E2F1; CDK1; CDC25C; CEP57; CDC25A; GTSE1; FBXL7; HAUS6; FOXM1; AURKA; UBC; CENPF; NEK2	995; 54801; 983; 9702; 1869; 1063; 890; 23194; 51512; 9133; 7514; 993; 6790; 2305; 4751; 286826; 22974; 23354; 7316	139	139
Telomere C-strand (Lagging Strand) Synthesis	0.000227203	0.00586124	Reactome	R-HSA-174417	POLA2; DNA2; RFC5; RFC4; POLD1; POLE; FEN1	1763; 5426; 23649; 5985; 5424; 2237; 5984	24	24
G0 and Early G1	0.000300687	0.00755278	Reactome	R-HSA-1538133	CCNA2; LIN9; E2F1; CDC25A; CCNE1; CDK1; TOP2A	983; 286826; 898; 993; 1869; 890; 7153	25	25
Cyclin A/B1/B2 associated events during G2/M transition	0.000300687	0.00755278	Reactome	R-HSA-69273	XPO1; CCNB2; CCNA2; CDC25C; CDC25A; CDK1; FOXM1	995; 983; 9133; 7514; 993; 890; 2305	25	25
Progesterone-mediated oocyte maturation - Homo sapiens (human)	0.00032289	0.00800516	KEGG	path:hsa04914	ADCY4; CCNB2; IGF1; BUB1; ADCY3; CDC25C; STK10; ADCY9; CDK1; MAD2L1; AURKA; PIK3R1; CCNA2; CDC25A; MAPK11	109; 115; 6790; 6793; 5295; 699; 196883; 995; 890; 3479; 9133; 983; 5600; 993; 4085	99	99
Homologous DNA Pairing and Strand Exchange	0.000384654	0.00941416	Reactome	R-HSA-5693579	DNA2; TOPBP1; RFC5; RFC4; RAD9A; BLM; RAD51AP1; MRE11; CHEK1	1763; 1111; 11073; 10635; 5985; 5883; 5984; 641; 4361	42	42
ATM Signaling Pathway	0.000400658	0.00968172	Wikipathways	WP2516	CDC25C; CDC25A; CCNE1; JUN; CDK1; RAD9A	995; 993; 898; 983; 5883; 3725	19	19
Intracellular signaling by second messengers	0.000461872	0.010913	Reactome	R-HSA-9006925	PDGFRB; KDM1A; OTUD3; USP7; FOXO1; EZH2; TNRC6A; EED; TSC2; STUB1; PDE1B; PDE1A; JUN; PIK3R1; PIP4K2A; PDGFA; USP13; SNAI2; ITPR1; ADCY4; ADCY3; RBBP7; ADCY9; MECOM; UBC; PDPK1; RHEB	3725; 2146; 5159; 5305; 196883; 6009; 6591; 5136; 8975; 5931; 5295; 109; 23252; 7249; 2308; 27327; 23028; 10273; 5154; 8726; 5153; 5170; 2122; 115; 3708; 7316; 7874	245	245
Kinesins	0.000463046	0.010913	Reactome	R-HSA-983189	RACGAP1; KIF23; KIF18B; KIF15; KIF11; KIF4A; KIF20A; KIF2C; KIFC1	10112; 3833; 9493; 56992; 3832; 11004; 24137; 29127; 146909	43	43
Oocyte meiosis - Homo sapiens (human)	0.000492125	0.0114569	KEGG	path:hsa04114	ADCY4; CCNB2; IGF1; BUB1; FBXO43; ADCY3; CDC25C; SGO1; CCNE1; ADCY9; CDC20; CDK1; MAD2L1; ESPL1; AURKA; ITPR1; SMC3	151648; 109; 115; 3708; 6790; 699; 983; 196883; 9700; 898; 3479; 9126; 9133; 286151; 991; 995; 4085	125	125
Transcriptional Regulation by E2F6	0.000509893	0.0117275	Reactome	R-HSA-8953750	E2F6; E2F1; PCGF6; RBBP7; EZH2; EED; CDC7; CHEK1	1876; 8317; 1111; 2146; 84108; 1869; 5931; 8726	35	35
G2/M Transition	0.000519913	0.011751	Reactome	R-HSA-69275	XPO1; CCNB2; TPX2; HAUS5; CCNA2; UBC; LIN9; CDK1; CDC25C; CEP57; CDC25A; GTSE1; FBXL7; HAUS6; FOXM1; AURKA; CENPF; NEK2	995; 54801; 983; 9702; 1063; 890; 23194; 51512; 9133; 7514; 993; 6790; 2305; 4751; 286826; 22974; 23354; 7316	137	137
Ubiquitin Mediated Degradation of Phosphorylated Cdc25A	0.000535537	0.011751	Reactome	R-HSA-69601	CDC25A; CHEK1; CHEK2; UBC	7316; 11200; 993; 1111	8	8
p53-Independent DNA Damage Response	0.000535537	0.011751	Reactome	R-HSA-69610	CDC25A; CHEK1; CHEK2; UBC	7316; 11200; 993; 1111	8	8
p53-Independent G1/S DNA damage checkpoint	0.000535537	0.011751	Reactome	R-HSA-69613	CDC25A; CHEK1; CHEK2; UBC	7316; 11200; 993; 1111	8	8
Lagging Strand Synthesis	0.000545902	0.0117525	Reactome	R-HSA-69186	POLA2; DNA2; RFC5; RFC4; POLD1; FEN1	1763; 5984; 5985; 23649; 5424; 2237	20	20
TGF_beta_Receptor	0.000547918	0.0117525	NetPath	Pathway_TGF_beta_Receptor	XPO1; TGFBR2; CCNE1; CCNB2; FOSB; FOS; JUN; UBE2I; ENG; MEF2C; CDK1; FOXO1; TGFB3; CREBBP; PIK3R1; SNX4; PDPK1; ZEB1; CDC25A; ING2; CAV1	3725; 7048; 983; 2354; 9133; 2353; 7514; 993; 5295; 3622; 857; 2022; 7329; 2308; 4208; 8723; 898; 5170; 1387; 7043; 6935	174	173
RHO GTPase Effectors	0.000557677	0.0118289	Reactome	R-HSA-195258	KDM1A; MAD2L1; MYH14; MYH11; ZWINT; DSN1; RHOB; IQGAP2; IQGAP3; XPO1; NUF2; SKA1; DVL3; KIF2C; AURKB; CDCA8; CENPO; CENPL; BUB1; NUP107; CDC25C; CENPF; CENPA; ZWILCH; RCC2; SGO1; CDC20; PDPK1; ACTB; SPC25; SPC24	995; 55143; 9212; 991; 1063; 57405; 57122; 11130; 147841; 4085; 388; 55055; 7514; 60; 83540; 55920; 23028; 79980; 220134; 1058; 699; 5170; 4629; 128239; 1857; 10788; 79784; 11004; 79172; 151648; 91687	301	300
TP53 Regulates Transcription of Genes Involved in G1 Cell Cycle Arrest	0.000661042	0.0137185	Reactome	R-HSA-6804116	E2F7; CCNE1; CCNA2; E2F1; E2F8	890; 1869; 144455; 79733; 898	14	14
Endothelins	0.000673568	0.0137185	PID	endothelinpathway	ADCY4; PRKCH; FOS; ADCY3; JUN; ADCY9; GNAZ; GNA14; TRPC6; EDNRA; EDNRB	1909; 5583; 3725; 9630; 1910; 115; 2353; 7225; 196883; 109; 2781	64	64
Regulation of retinoblastoma protein	0.000673568	0.0137185	PID	rb_1pathway	DNMT1; CCNA2; E2F1; TBP; CCNE1; JUN; MEF2C; CDKN2A; CCND2; MAPK11; CREBBP	3725; 4208; 1387; 898; 6908; 1869; 5600; 890; 1786; 894; 1029	64	64
Rho GTPase cycle	0.000675506	0.0137185	Reactome	R-HSA-194840	STARD13; AKAP13; ECT2; RASGRF2; ARHGAP17; RACGAP1; ARHGEF5; ARHGEF39; RHOJ; STARD8; ARHGDIB; ARHGAP11A; ARHGAP24; FGD1; RHOB; ARHGAP6; DEPDC1B; ARHGEF15	388; 1894; 5924; 22899; 395; 9824; 9754; 397; 57381; 90627; 7984; 55789; 83478; 55114; 11214; 2245; 84904; 29127	144	140
PTEN Regulation	0.000749464	0.0150603	Reactome	R-HSA-6807070	KDM1A; USP7; STUB1; JUN; OTUD3; MECOM; USP13; EZH2; TNRC6A; UBC; SNAI2; EED; RHEB; RBBP7	3725; 6591; 2146; 23252; 6009; 8975; 5931; 27327; 23028; 8726; 10273; 2122; 7316; 7874	96	96
Fanconi anemia pathway	0.000780278	0.0155162	PID	fanconi_pathway	BLM; TOPBP1; RFC5; RFC4; RAD9A; FANCG; FANCD2; MRE11; CHEK1	2189; 1111; 11073; 5985; 5883; 5984; 2177; 641; 4361	46	46
Prostate cancer - Homo sapiens (human)	0.00083253	0.0163845	KEGG	path:hsa05215	PDGFA; IGF1; PDGFD; E2F1; PDGFRB; CCNE1; ERG; PLAT; FOXO1; CREB3L1; PIK3R1; PDPK1; ZEB1; CREBBP	2078; 5154; 5159; 5170; 90993; 5295; 5327; 2308; 6935; 1869; 1387; 898; 3479; 80310	97	97
Integrated Breast Cancer Pathway	0.000880327	0.0171484	Wikipathways	WP1984	RASGRP3; E2F1; RAD54L; CDC25A; JUN; CASP8; FOXO1; AURKA; TFPI; TSC2; ODC1	25780; 7035; 2308; 4953; 7249; 8438; 993; 1869; 3725; 841; 6790	66	66
superpathway of pyrimidine ribonucleotides <i>de novo</i> biosynthesis	0.00094688	0.0182515	HumanCyc	PWY0-162	NME4; CAD; UMPS; CTPS1; NME3	1503; 4832; 4833; 7372; 790	15	15
role of brca1 brca2 and atr in cancer susceptibility	0.000956077	0.0182515	BioCarta	atrbrcapathway	MRE11; RAD9A; FANCG; FANCD2; CHEK2; CHEK1	2189; 1111; 11200; 5883; 2177; 4361	22	22
Presynaptic phase of homologous DNA pairing and strand exchange	0.00109679	0.0206923	Reactome	R-HSA-5693616	DNA2; TOPBP1; RFC5; RFC4; RAD9A; BLM; MRE11; CHEK1	1763; 1111; 11073; 5985; 5883; 5984; 641; 4361	39	39
Chromosome Maintenance	0.00110561	0.0206923	Reactome	R-HSA-73886	RARA; POLA2; CENPL; HJURP; RFC5; RFC4; RBBP7; CENPA; POLD1; POLE; DNA2; FEN1; TERF2IP; CENPO; RUVBL1	5914; 55355; 23649; 91687; 54386; 8607; 5426; 5931; 1763; 5985; 5424; 1058; 79172; 2237; 5984	112	111
Signal Transduction	0.00120659	0.0223629	Reactome	R-HSA-162582	PIP4K2A; NCBP2; PDGFRB; WLS; PCSK5; RAPGEF4; TNRC6A; RAPGEF3; KIF2C; CAV1; EEF2K; RGS5; PTGER4; ARHGEF5; FSTL3; PTGER3; PDE7B; ARHGAP24; CDH5; CENPO; CAB39L; CENPL; ARHGEF15; NUF2; CENPF; CXCR4; RAMP3; RAMP2; P2RY14; SNAI2; DEPDC1B; ABHD6; ADCY4; CASP10; CX3CR1; GPR4; DUSP6; EIF4G1; ADCY3; RBBP7; ADCY9; FOXA1; F2R; STARD8; UBC; ACTB; YBX1; SGO1; SPC25; MAPK11; RASGRP3; STARD13; PRKCH; ZWINT; FRS3…	9787; 1902; 196883; 2354; 5583; 79980; 1843; 7874; 55143; 5734; 1063; 3955; 5136; 9824; 8322; 83478; 55114; 11214; 2245; 79784; 5327; 7048; 10272; 57406; 5745; 6591; 7474; 388; 5924; 22899; 51083; 7514; 857; 57381; 25780; 51308; 1387; 2149; 2146; 525; 90627; 51377; 11004; 142; 5600; 5138; 84904; 7905; 7433; 9630; 57122; 23252; 9212; 94; 5154; 3708; 7316; 5433; 81617; 92840; 10266; 3910; 27115; 64…	2647	2633
cyclins and cell cycle regulation	0.0012339	0.0224335	BioCarta	cellcyclepathway	CCND2; E2F1; CDC25A; CCNE1; CDK1; CDKN2A	894; 983; 993; 1869; 1029; 898	23	23
caspase cascade in apoptosis	0.0012339	0.0224335	BioCarta	caspasepathway	LMNB2; CASP4; PARP1; CASP8; CASP10; ARHGDIB	84823; 837; 841; 397; 142; 843	23	23
HDR through MMEJ (alt-NHEJ)	0.00146993	0.0263423	Reactome	R-HSA-5685939	MRE11; FEN1; PARP1; POLQ	142; 10721; 2237; 4361	10	10
FasL/ CD95L signaling	0.0015326	0.0263423	Reactome	R-HSA-75157	CASP10; FAS; CASP8	355; 841; 843	5	5
PLK3 signaling events	0.0015326	0.0263423	PID	plk3_pathway	CDC25C; CCNE1; CHEK2	995; 11200; 898	5	5
Mitotic G2-G2-M phases	0.0015326	0.0263423	Wikipathways	WP1859	CCNB2; CDC25A; CENPF	9133; 1063; 993	5	5
G Protein Signaling Pathways	0.00153832	0.0263423	Wikipathways	WP35	ADCY4; PRKCH; ADCY3; PDE1B; PDE1A; GNG11; GNAZ; ADCY9; RRAS; GNA14; PDE7B; AKAP13; ITPR1	5583; 2791; 5153; 115; 2781; 196883; 109; 11214; 5136; 3708; 9630; 27115; 6237	92	92
APC/C-mediated degradation of cell cycle proteins	0.00154549	0.0263423	Reactome	R-HSA-174143	MAD2L1; NEK2; CDC20; CDK1; AURKA; AURKB; UBC; CCNA2	4085; 4751; 983; 991; 9212; 7316; 6790; 890	41	41
Regulation of mitotic cell cycle	0.00154549	0.0263423	Reactome	R-HSA-453276	MAD2L1; NEK2; CDC20; CDK1; AURKA; AURKB; UBC; CCNA2	4085; 4751; 983; 991; 9212; 7316; 6790; 890	41	41
Resolution of AP sites via the multiple-nucleotide patch replacement pathway	0.00156947	0.0265143	Reactome	R-HSA-110373	RFC5; RFC4; PARP1; POLD1; POLE; FEN1	5426; 5985; 5424; 2237; 142; 5984	24	24
Resolution of D-loop Structures through Holliday Junction Intermediates	0.00181896	0.0304596	Reactome	R-HSA-5693568	DNA2; SLX4; MRE11; GEN1; BLM; RAD51AP1; EME1	1763; 146956; 10635; 348654; 641; 84464; 4361	34	33
Human papillomavirus infection - Homo sapiens (human)	0.00206884	0.0341602	KEGG	path:hsa05165	PDGFRB; HDAC6; ITGA5; FOXO1; TSC2; HEYL; FZD4; PTGER4; FAS; CCNE1; DVL3; PIK3R1; ATP6V1B1; JAG1; ATP6V0C; LAMA4; CCNA2; WNT5A; HEY1; LFNG; E2F1; NOTCH4; TBP; CCND2; ATP6V1E1; CASP8; TLR3; CREB3L1; ATP6V0E1; VWF; RHEB; CREBBP	527; 529; 2308; 5295; 5159; 3955; 7249; 3678; 5734; 8322; 4855; 6908; 7450; 10013; 8992; 7474; 1857; 3910; 1869; 182; 355; 1387; 90993; 6009; 890; 894; 898; 23462; 26508; 841; 7098; 525	339	339
Direct p53 effectors	0.00207574	0.0341602	PID	p53downstreampathway	CASP10; BTG2; E2F1; DUSP1; FAS; MSH2; JUN; CSE1L; FOXA1; HIC1; CEBPZ; SNAI2; PYCARD; TSC2; TADA2B; CREBBP; CAV1	4436; 3725; 6591; 3169; 1869; 29108; 355; 7249; 857; 10153; 7832; 1434; 1387; 93624; 3090; 1843; 843	143	142
Pyrimidine metabolism	0.00209452	0.0341747	Wikipathways	WP4022	NME4; POLA2; UMPS; CTPS1; POLD1; DCTD; POLR2D; POLE; POLR3E; TK2; NME3; CAD	55718; 4833; 5433; 1635; 790; 5426; 1503; 23649; 5424; 7084; 7372; 4832	84	84
Fas Ligand (FasL) pathway and Stress induction of Heat Shock Proteins (HSP) regulation	0.00212847	0.0344344	Wikipathways	WP314	LMNB2; FAS; JUN; PARP1; CASP8; CASP10; ARHGDIB; ACTB	397; 355; 142; 3725; 60; 843; 841; 84823	43	43
LPA receptor mediated events	0.0021824	0.0345772	PID	lysophospholipid_pathway	ADCY4; FOS; SLC9A3R2; ADCY3; JUN; ADCY9; GNAZ; GNA14; PIK3R1; LPAR1	3725; 9630; 115; 9351; 2353; 1902; 5295; 196883; 109; 2781	64	63
Myometrial Relaxation and Contraction Pathways	0.00219263	0.0345772	Wikipathways	WP289	ACTA2; PRKCH; ITPR1; GJA1; CNN2; RYR1; ADCY4; ADCY3; JUN; GNG11; RAMP3; ADCY9; RGS5; IGFBP4; ACTB; LPAR1; FOS; RAMP2	1265; 5583; 8490; 3487; 60; 59; 196883; 2791; 115; 6261; 109; 1902; 3725; 2697; 2353; 10266; 10268; 3708	155	155
Establishment of Sister Chromatid Cohesion	0.00220975	0.0345772	Reactome	R-HSA-2468052	ESCO2; SMC3; RAD21; CDCA5	9126; 113130; 5885; 157570	11	11
role of ran in mitotic spindle regulation	0.00220975	0.0345772	BioCarta	ranmspathway	KIF15; TPX2; AURKA; KPNA2	56992; 6790; 22974; 3838	11	11
S1P2 pathway	0.00244355	0.0373179	PID	s1p_s1p2_pathway	FOS; JUN; GNAZ; GNA14; PIK3R1; CDH5	3725; 9630; 1003; 2353; 5295; 2781	26	26
ALK1 signaling events	0.00244355	0.0373179	PID	alk1pathway	TGFBR2; ACVR2B; TGFB3; ENG; ACVRL1; CAV1	7048; 7043; 2022; 94; 857; 93	26	26
Downregulation of TGF-beta receptor signaling	0.00244355	0.0373179	Reactome	R-HSA-2173788	XPO1; TGFBR2; STUB1; PMEPA1; UBC; UCHL5	10273; 7048; 51377; 7316; 7514; 56937	26	26
Resolution of D-Loop Structures	0.00260185	0.0394201	Reactome	R-HSA-5693537	DNA2; SLX4; MRE11; GEN1; BLM; RAD51AP1; EME1	1763; 146956; 10635; 348654; 641; 84464; 4361	36	35
Processing of DNA double-strand break ends	0.00273696	0.0411407	Reactome	R-HSA-5693607	UBE2I; DNA2; CCNA2; TOPBP1; TIPIN; RFC5; RFC4; RAD9A; BLM; MRE11; UBC; NSD2; CHEK1	5883; 890; 7316; 1763; 54962; 7329; 5985; 641; 1111; 7468; 5984; 11073; 4361	99	98
VEGFA-VEGFR2 Signaling Pathway	0.00278077	0.0414726	Wikipathways	WP3888	ACP1; FOXO1; ERG; TXNIP; CAV1; HERPUD1; MMRN2; JUN; INPP4B; MAP3K5; PIK3R1; JAG1; CDH5; ARHGEF15; RHOJ; DLL4; IGFBP7; PBK; GJA1; NOTCH4; MEF2C; RND1; FAS; PDPK1	5170; 3490; 3725; 182; 9709; 52; 4208; 2308; 2078; 4217; 1003; 857; 10628; 8821; 54567; 79812; 2697; 5295; 55872; 22899; 27289; 355; 4855; 57381	236	236
Validated targets of C-MYC transcriptional activation	0.00282929	0.0418692	PID	myc_activpathway	CREBBP; RUVBL1; SUPT7L; MYCT1; CDC25A; CCND2; ODC1; ACTL6A; HMGA1; EIF4G1; CDCA7; CAD	86; 9913; 8607; 790; 80177; 993; 83879; 1981; 4953; 1387; 3159; 894	87	87
Integrin-linked kinase signaling	0.00287164	0.0421689	PID	ilk_pathway	XPO1; RUVBL1; JUN; PARP1; ILKAP; AURKA; GIT2; ZEB1	3725; 9815; 7514; 6790; 80895; 6935; 142; 8607	45	45
Signaling by NOTCH4	0.00293972	0.0428392	Wikipathways	WP2721	ACTA2; FLT4; HEY1	23462; 59; 2324	6	6
Enzymatic degradation of Dopamine by monoamine oxidase	0.00303273	0.0435299	Reactome	R-HSA-379398	MAOA; COMT	4128; 1312	2	2
UMP biosynthesis	0.00303273	0.0435299	HumanCyc	PWY-5686	UMPS; CAD	7372; 790	2	2
Condensation of Prometaphase Chromosomes	0.00317121	0.045178	Reactome	R-HSA-2514853	NCAPG; CCNB2; SMC4; CDK1	10051; 9133; 983; 64151	12	12
Androgen receptor signaling pathway	0.00342621	0.0484491	Wikipathways	WP138	PLPP1; UBE2I; KDM1A; STUB1; RAD9A; CCNE1; JUN; FOXO1; PIK3R1; RHOB; CREBBP; CAV1	3725; 1387; 2308; 388; 10273; 857; 8611; 5295; 5883; 7329; 898; 23028	89	89
HDR through Single Strand Annealing (SSA)	0.00362063	0.0498963	Reactome	R-HSA-5685938	DNA2; TOPBP1; RFC5; RFC4; RAD9A; BLM; MRE11	1763; 11073; 5985; 5883; 5984; 641; 4361	37	37
Resolution of Abasic Sites (AP sites)	0.00362063	0.0498963	Reactome	R-HSA-73933	MPG; RFC5; RFC4; PARP1; POLD1; POLE; FEN1	5426; 5985; 5424; 2237; 142; 5984; 4350	37	37
Base Excision Repair	0.00362063	0.0498963	Reactome	R-HSA-73884	MPG; RFC5; RFC4; PARP1; POLD1; POLE; FEN1	5426; 5985; 5424; 2237; 142; 5984; 4350	37	37
Nucleotide Excision Repair	0.0036331	0.0498963	Reactome	R-HSA-5696398	UBE2I; RUVBL1; POLR2D; RFC5; RFC4; ERCC3; PARP1; USP7; POLD1; POLE; ACTL6A; ISY1; UBC; ACTB	57461; 86; 8607; 7316; 5426; 2071; 60; 7329; 5985; 5424; 5433; 142; 5984; 7874	113	113
Regulation of Telomerase	0.00387895	0.0528922	PID	telomerasepathway	SMG5; E2F1; FOS; JUN; RAD9A; RBBP7; BLM; PIF1; TERF2IP; MRE11	5931; 2353; 80119; 5883; 1869; 54386; 23381; 641; 3725; 4361	68	68
Iron uptake and transport	0.00418675	0.0566844	Reactome	R-HSA-917937	ATP6V0C; ABCG2; SLC40A1; UBC; ATP6V1E1; CYBRD1; ATP6V0E1; ATP6V1B1; HMOX2	525; 529; 527; 8992; 3163; 79901; 7316; 9429; 30061	58	58
APC:Cdc20 mediated degradation of cell cycle proteins prior to satisfation of the cell cycle checkpoint	0.00437991	0.0573072	Reactome	R-HSA-179419	MAD2L1; CCNA2; CDC20; CDK1; UBC; NEK2	4085; 983; 4751; 991; 7316; 890	29	29
Chk1/Chk2(Cds1) mediated inactivation of Cyclin B:Cdk1 complex	0.00438285	0.0573072	Reactome	R-HSA-75035	CDC25C; CDK1; CHEK2; CHEK1	995; 11200; 1111; 983	13	13
TP53 Regulates Transcription of Cell Cycle Genes	0.00438285	0.0573072	Wikipathways	WP3804	CDC25C; E2F7; BTG2; E2F1	995; 144455; 1869; 7832	13	13
b cell survival pathway	0.00438285	0.0573072	BioCarta	bcellsurvivalpathway	PDPK1; ZBTB7A; CCT4; PIK3R1	5295; 51341; 5170; 10575	13	13
Receptor-ligand binding initiates the second proteolytic cleavage of Notch receptor	0.00438285	0.0573072	Reactome	R-HSA-156988	NOTCH4; JAG1; DLL4; UBC	7316; 54567; 182; 4855	13	13
PCNA-Dependent Long Patch Base Excision Repair	0.00487262	0.0620122	Reactome	R-HSA-5651801	RFC5; RFC4; POLE; FEN1; POLD1	5984; 5985; 5426; 5424; 2237	21	21
p53-Dependent G1 DNA Damage Response	0.00487262	0.0620122	Reactome	R-HSA-69563	CCNA2; CDKN2A; CHEK2; CCNE1; UBC	7316; 11200; 890; 1029; 898	21	21
p53-Dependent G1/S DNA damage checkpoint	0.00487262	0.0620122	Reactome	R-HSA-69580	CCNA2; CDKN2A; CHEK2; CCNE1; UBC	7316; 11200; 890; 1029; 898	21	21
Neovascularisation processes	0.00487262	0.0620122	Wikipathways	WP4331	FLT4; JAG1; DLL4; ACVRL1; CXCR4	54567; 2324; 182; 94; 7852	21	21
PDGF receptor signaling network	0.00493453	0.0623842	PID	pdgf_pathway	PDGFRB; PDGFD; PDGFA	5159; 5154; 80310	7	7
Photodynamic therapy-induced AP-1 survival signaling.	0.0056171	0.0696201	Wikipathways	WP3611	CDKN2A; CCNA2; FOS; FAS; CCNE1; JUN; MAP3K5; MAPK11	5600; 3725; 890; 4217; 898; 1029; 355; 2353	50	50
Vibrio cholerae infection - Homo sapiens (human)	0.0056171	0.0696201	KEGG	path:hsa05110	ATP6V0C; ADCY3; ATP6V1E1; ADCY9; ATP6V0E1; ATP6V1B1; ACTB; SEC61A2	55176; 525; 527; 529; 8992; 60; 109; 115	50	50
G2/M DNA damage checkpoint	0.0058478	0.0696201	Reactome	R-HSA-69473	DNA2; TOPBP1; CDC25C; RFC4; RAD9A; RFC5; BLM; CDK1; MRE11; NSD2; CHEK2; CHEK1	995; 983; 5883; 1763; 5985; 641; 1111; 11073; 11200; 7468; 5984; 4361	96	95
Removal of the Flap Intermediate	0.00587157	0.0696201	Reactome	R-HSA-69166	POLA2; DNA2; FEN1; POLD1	1763; 23649; 5424; 2237	14	14
Polymerase switching on the C-strand of the telomere	0.00587157	0.0696201	Reactome	R-HSA-174411	RFC5; RFC4; POLD1; POLA2	5984; 23649; 5985; 5424	14	14
Polymerase switching	0.00587157	0.0696201	Reactome	R-HSA-69091	RFC5; RFC4; POLD1; POLA2	5984; 23649; 5985; 5424	14	14
Leading Strand Synthesis	0.00587157	0.0696201	Reactome	R-HSA-69109	RFC5; RFC4; POLD1; POLA2	5984; 23649; 5985; 5424	14	14
CDT1 association with the CDC6:ORC:origin complex	0.00587157	0.0696201	Reactome	R-HSA-68827	MCM8; CDT1; ORC1; UBC	7316; 84515; 4998; 81620	14	14
Mitotic Telophase/Cytokinesis	0.00587157	0.0696201	Reactome	R-HSA-68884	SMC3; RAD21; KIF23; KIF20A	9126; 9493; 10112; 5885	14	14
SEMA3A-Plexin repulsion signaling by inhibiting Integrin adhesion	0.00587157	0.0696201	Reactome	R-HSA-399955	SEMA3A; RRAS; RND1; PLXNA4	10371; 6237; 91584; 27289	14	14
E2F mediated regulation of DNA replication	0.00602455	0.0705574	Reactome	R-HSA-113510	POLA2; CDK1; ORC1; E2F1; MCM8	983; 84515; 23649; 4998; 1869	22	22
superpathway of pyrimidine deoxyribonucleotides <i>de novo</i> biosynthesis	0.00602455	0.0705574	HumanCyc	PWY-7211	NME4; CAD; UMPS; CTPS1; NME3	4833; 1503; 4832; 7372; 790	22	22
APC/C:Cdc20 mediated degradation of mitotic proteins	0.00618281	0.0719325	Reactome	R-HSA-176409	MAD2L1; CCNA2; CDC20; CDK1; UBC; NEK2	4085; 983; 4751; 991; 7316; 890	31	31
Global Genome Nucleotide Excision Repair (GG-NER)	0.00621732	0.0719325	Reactome	R-HSA-5696399	UBE2I; RUVBL1; RFC5; RFC4; ERCC3; PARP1; POLD1; POLE; ACTL6A; UBC; ACTB	7329; 5426; 86; 7316; 5985; 5424; 2071; 142; 5984; 8607; 60	84	84
Pyrimidine nucleotides nucleosides metabolism	0.00634864	0.0730094	INOH	None	NME4; UMPS; CTPS1; NME3; DCTD; TK2; ABAT; CAD	1635; 4833; 1503; 7084; 4832; 7372; 18; 790	51	51
Homologous recombination - Homo sapiens (human)	0.00653516	0.0742597	KEGG	path:hsa03440	RAD54B; TOPBP1; RAD54L; MRE11; BLM; POLD1; EME1	641; 4361; 146956; 5424; 25788; 11073; 8438	41	41
Dual Incision in GG-NER	0.00653516	0.0742597	Reactome	R-HSA-5696400	RFC5; RFC4; ERCC3; PARP1; POLD1; POLE; UBC	5426; 2071; 7316; 5985; 5424; 142; 5984	41	41
Transcriptional misregulation in cancer - Homo sapiens (human)	0.00658428	0.0743751	KEGG	path:hsa05202	RARA; PDGFA; DUSP6; TGFBR2; LMO2; CCND2; FLI1; PLAT; MEF2C; FOXO1; ERG; TSPAN7; IGF1; MAF; BAIAP3; NFKBIZ; NSD2; ZEB1; FUT8	2078; 5154; 4208; 7102; 6935; 64332; 5327; 8938; 2308; 2313; 5914; 7468; 7048; 1848; 2530; 894; 3479; 4005; 4094	186	185
Activation of APC/C and APC/C:Cdc20 mediated degradation of mitotic proteins	0.00726266	0.0795505	Reactome	R-HSA-176814	MAD2L1; CCNA2; CDC20; CDK1; UBC; NEK2	4085; 983; 4751; 991; 7316; 890	32	32
DAG and IP3 signaling	0.00726266	0.0795505	Reactome	R-HSA-1489509	ADCY4; ADCY3; PDE1B; PDE1A; ADCY9; ITPR1	5153; 115; 3708; 5136; 196883; 109	32	32
Gastric Cancer Network 2	0.00726266	0.0795505	Wikipathways	WP2363	LMNB2; RFC4; ATAD2; CEBPZ; TOP2A; DSCC1	7153; 5984; 10153; 84823; 79075; 29028	32	32
TGF-beta receptor signaling activates SMADs	0.00726266	0.0795505	Reactome	R-HSA-2173789	XPO1; TGFBR2; STUB1; PMEPA1; UBC; UCHL5	10273; 7048; 51377; 7316; 7514; 56937	32	32
White fat cell differentiation	0.00726266	0.0795505	Wikipathways	WP4149	RARA; MECOM; FOXO1; ZNF423; EBF1; KLF2	23090; 10365; 1879; 2308; 5914; 2122	32	32
MECP2 and Associated Rett Syndrome	0.00729247	0.0795505	Wikipathways	WP3584	GRID1; E2F1; SGK1; SMC3; MEF2C; EZH2; CSRP1; YBX1; FUT8	1869; 9126; 4208; 1465; 6446; 2146; 2894; 4904; 2530	63	63
PIP3 activates AKT signaling	0.00740862	0.0803583	Reactome	R-HSA-1257604	PDGFRB; PDGFA; TSC2; UBC; TNRC6A; KDM1A; STUB1; RBBP7; OTUD3; JUN; MECOM; USP13; FOXO1; EZH2; PIK3R1; PDPK1; SNAI2; EED; RHEB; PIP4K2A; USP7	3725; 2146; 5159; 5305; 6009; 6591; 8975; 5931; 5295; 23252; 7249; 2308; 27327; 23028; 5154; 8726; 10273; 5170; 2122; 7316; 7874	214	214
Oxidative Stress Induced Senescence	0.00757393	0.0816872	Wikipathways	WP3404	EED; CDKN2A; EZH2	1029; 2146; 8726	8	8
Processive synthesis on the lagging strand	0.00766237	0.0817176	Reactome	R-HSA-69183	POLA2; DNA2; FEN1; POLD1	1763; 23649; 5424; 2237	15	15
Early Phase of HIV Life Cycle	0.00766237	0.0817176	Reactome	R-HSA-162594	FEN1; HMGA1; PSIP1; CXCR4	11168; 7852; 2237; 3159	15	15
Apoptosis - Homo sapiens (human)	0.00792116	0.0840083	KEGG	path:hsa04210	LMNB2; TUBA8; FOS; FAS; CTSO; JUN; PARP1; CASP8; MAP3K5; CASP10; IL3RA; PIK3R1; PDPK1; ACTB; ITPR1	5170; 60; 51807; 4217; 3708; 142; 5295; 843; 2353; 3725; 84823; 355; 3563; 841; 1519	136	136
Semaphorin interactions	0.00808295	0.0852505	Reactome	R-HSA-373755	SEMA3A; MYH11; MYH14; SEMA5A; PLXNA4; RRAS; RND1; RHOB; SEMA6D	388; 91584; 10371; 4629; 27289; 79784; 9037; 6237; 80031	64	64
mTOR signaling pathway - Homo sapiens (human)	0.00851803	0.0878628	KEGG	path:hsa04150	CAB39L; IGF1; FZD4; SGK1; ATP6V1E1; DVL3; WDR24; PDPK1; DEPTOR; PIK3R1; TELO2; ATP6V1B1; WNT5A; RHEB; TSC2; NPRL3	525; 529; 7249; 8322; 5170; 9894; 81617; 84219; 6446; 64798; 5295; 7474; 1857; 6009; 3479; 8131	151	150
Deposition of new CENPA-containing nucleosomes at the centromere	0.00851875	0.0878628	Reactome	R-HSA-606279	RARA; CENPO; CENPL; HJURP; RBBP7; CENPA; RUVBL1	5914; 8607; 55355; 91687; 79172; 5931; 1058	43	43
Nucleosome assembly	0.00851875	0.0878628	Reactome	R-HSA-774815	RARA; CENPO; CENPL; HJURP; RBBP7; CENPA; RUVBL1	5914; 8607; 55355; 91687; 79172; 5931; 1058	43	43
Leukocyte transendothelial migration - Homo sapiens (human)	0.00857692	0.0878628	KEGG	path:hsa04670	PECAM1; ESAM; JAM2; JAM3; CXCR4; CLDN5; RAPGEF4; MAPK11; PIK3R1; RAPGEF3; ACTB; CDH5; THY1	5175; 60; 58494; 7852; 5295; 10411; 11069; 90952; 7070; 83700; 7122; 5600; 1003	112	112
Phosphorylation of proteins involved in the G2/M transition by Cyclin A:Cdc2 complexes	0.00876482	0.0878628	Reactome	R-HSA-170145	CDK1; CCNA2	983; 890	3	3
Enzymatic degradation of dopamine by COMT	0.00876482	0.0878628	Reactome	R-HSA-379397	MAOA; COMT	4128; 1312	3	3
Pyrimidine biosynthesis	0.00876482	0.0878628	Reactome	R-HSA-500753	UMPS; CAD	7372; 790	3	3
Integration of viral DNA into host genomic DNA	0.00876482	0.0878628	Reactome	R-HSA-175567	PSIP1; HMGA1	11168; 3159	3	3
Autointegration results in viral DNA circles	0.00876482	0.0878628	Reactome	R-HSA-177539	PSIP1; HMGA1	11168; 3159	3	3
Gap junction - Homo sapiens (human)	0.00879088	0.0878628	KEGG	path:hsa04540	ADCY4; PDGFA; TUBA8; PDGFD; ADCY3; GJA1; LPAR1; ADCY9; CDK1; ITPR1; PDGFRB	5154; 5159; 51807; 109; 115; 3708; 2697; 196883; 1902; 80310; 983	88	88
Sema4D in semaphorin signaling	0.00887786	0.08827	Reactome	R-HSA-400685	RRAS; RHOB; RND1; MYH14; MYH11	388; 4629; 27289; 79784; 6237	24	24
Pyrimidine metabolism - Homo sapiens (human)	0.00946225	0.093593	KEGG	path:hsa00240	NME4; POLA2; UMPS; CTPS1; NME3; DCTD; POLD1; POLE; POLR3E; TK2; POLR2D; CAD	23649; 1635; 7372; 4832; 4833; 790; 5424; 5426; 5433; 55718; 7084; 1503	101	101
PLC beta mediated events	0.00966153	0.0945839	Reactome	R-HSA-112043	ADCY4; ADCY3; PDE1B; PDE1A; ADCY9; GNAZ; ITPR1	5153; 115; 3708; 5136; 196883; 2781; 109	44	44
Signaling by NOTCH3	0.00966153	0.0945839	Reactome	R-HSA-9012852	DLGAP5; DLL4; UBC; JAG1; YBX1; CREBBP; HEY1	9787; 1387; 182; 4904; 7316; 54567; 23462	44	44
Transcription of E2F targets under negative control by DREAM complex	0.00977805	0.0952363	Reactome	R-HSA-1362277	CDC25A; E2F1; LIN9; TOP2A	286826; 7153; 993; 1869	16	16

## Sheet: TNBC RPPA Pathway 
pathway	p-value	q-value	source	external_id	members_input_overlap	members_input_overlap_geneids	size	effective_size
FOXM1 transcription factor network	2.29186e-09	6.94958e-07	PID	foxm1pathway	XRCC1; CCNB1; CCNE1; FOXM1; CDKN2A	7515; 898; 891; 2305; 1029	42	42
Mitotic G1-G1/S phases	3.90426e-09	6.94958e-07	Reactome	R-HSA-453279	PCNA; CCNB1; CDKN2A; CCNE2; CCNE1; AKT1	207; 898; 9134; 1029; 5111; 891	104	104
G1 to S cell cycle control	2.01675e-08	2.39321e-06	Wikipathways	WP45	PCNA; CCNE2; CCNB1; CCNE1; CDKN2A	5111; 891; 9134; 898; 1029	64	64
G1/S Transition	4.83794e-08	3.71303e-06	Reactome	R-HSA-69206	PCNA; AKT1; CCNB1; CCNE1; CCNE2	207; 898; 5111; 891; 9134	76	76
Cellular senescence - Homo sapiens (human)	5.21494e-08	3.71303e-06	KEGG	path:hsa04218	CCNB1; CDKN2A; CCNE2; CCNE1; AKT1; FOXM1	1029; 2305; 207; 891; 898; 9134	160	160
Signaling Pathways in Glioblastoma	7.55871e-08	4.48484e-06	Wikipathways	WP2261	AKT1; CDKN2A; CCNE1; EGFR; MSH6	2956; 207; 898; 1956; 1029	83	83
Retinoblastoma Gene in Cancer	1.07518e-07	5.46806e-06	Wikipathways	WP2446	CCNE2; PCNA; CCNB1; CCNE1; MSH6	2956; 9134; 5111; 891; 898	89	89
Prostate cancer - Homo sapiens (human)	1.65821e-07	7.37903e-06	KEGG	path:hsa05215	CCNE2; AKT1; AR; EGFR; CCNE1	207; 367; 898; 1956; 9134	97	97
Pathways in cancer - Homo sapiens (human)	2.09153e-07	8.27318e-06	KEGG	path:hsa05200	CDKN2A; CCNE2; CCNE1; EGFR; MSH6; AKT1; AR; MAPK8	367; 5599; 898; 2956; 9134; 1029; 207; 1956	526	526
Gastrin	2.52876e-07	9.00239e-06	NetPath	Pathway_Gastrin	AKT1; MAPK8; EGFR; RPS6	207; 6194; 1956; 5599	41	41
RAGE	3.70765e-07	1.19993e-05	NetPath	Pathway_RAGE	AKT1; MAPK8; CCNE1; EGFR	207; 1956; 898; 5599	45	45
Cell Cycle	4.81e-07	1.32253e-05	Wikipathways	WP179	CCNE2; PCNA; CCNB1; CDKN2A; CCNE1	9134; 1029; 5111; 891; 898	120	120
il-2 receptor beta chain in t cell activation	4.82947e-07	1.32253e-05	BioCarta	il2rbpathway	PCNA; AKT1; CCNB1; CCNE1	207; 5111; 898; 891	48	48
Cell cycle - Homo sapiens (human)	5.66353e-07	1.35427e-05	KEGG	path:hsa04110	PCNA; CCNE2; CCNB1; CDKN2A; CCNE1	1029; 898; 891; 5111; 9134	124	124
Photodynamic therapy-induced AP-1 survival signaling.	5.70618e-07	1.35427e-05	Wikipathways	WP3611	MAPK8; CCNE1; EGFR; CDKN2A	898; 1956; 5599; 1029	50	50
TP53 Regulates Transcription of Cell Cycle Genes	6.18646e-07	1.37649e-05	Reactome	R-HSA-6791312	CCNE2; PCNA; CCNB1; CCNE1	9134; 898; 5111; 891	51	51
Hepatitis B - Homo sapiens (human)	1.18982e-06	2.49162e-05	KEGG	path:hsa05161	CCNE2; AKT1; MAPK8; CCNE1; PCNA	207; 898; 5599; 9134; 5111	144	144
Leptin	1.36793e-06	2.70545e-05	NetPath	Pathway_Leptin	AKT1; MAPK8; EGFR; RPS6	207; 6194; 1956; 5599	62	62
Non-small cell lung cancer	1.76122e-06	3.29998e-05	Wikipathways	WP4255	PDK1; AKT1; CDKN2A; EGFR	5163; 207; 1956; 1029	66	66
Cell Cycle, Mitotic	2.00781e-06	3.57391e-05	Reactome	R-HSA-69278	PCNA; CCNB1; CDKN2A; CCNE2; CCNE1; AKT1; FOXM1	207; 2305; 891; 898; 1029; 5111; 9134	481	480
p53 signaling pathway - Homo sapiens (human)	2.50105e-06	4.03537e-05	KEGG	path:hsa04115	CCNE2; CCNB1; CDKN2A; CCNE1	1029; 898; 9134; 891	72	72
p53-Dependent G1 DNA Damage Response	2.92342e-06	4.03537e-05	Reactome	R-HSA-69563	CCNE2; CDKN2A; CCNE1	9134; 1029; 898	21	21
p53-Dependent G1/S DNA damage checkpoint	2.92342e-06	4.03537e-05	Reactome	R-HSA-69580	CCNE2; CDKN2A; CCNE1	9134; 1029; 898	21	21
TGF_beta_Receptor	2.94088e-06	4.03537e-05	NetPath	Pathway_TGF_beta_Receptor	PDK1; AKT1; MAPK8; AR; CCNE1	207; 367; 5599; 898; 5163	174	173
Pancreatic cancer - Homo sapiens (human)	2.94718e-06	4.03537e-05	KEGG	path:hsa05212	AKT1; MAPK8; CDKN2A; EGFR	1029; 1956; 5599; 207	75	75
E2F transcription factor network	2.94718e-06	4.03537e-05	PID	e2f_pathway	CCNE2; XRCC1; CDKN2A; CCNE1	9134; 7515; 1029; 898	75	75
IL2	3.10823e-06	4.09826e-05	NetPath	Pathway_IL2	AKT1; MAPK8; CCNE1; RPS6	207; 6194; 5599; 898	76	76
cyclins and cell cycle regulation	3.88603e-06	4.77044e-05	BioCarta	cellcyclepathway	CCNB1; CDKN2A; CCNE1	891; 1029; 898	23	23
G1/S DNA Damage Checkpoints	3.88603e-06	4.77044e-05	Reactome	R-HSA-69615	CCNE2; CDKN2A; CCNE1	9134; 1029; 898	23	23
PI3K-Akt Signaling Pathway	4.29773e-06	5.09998e-05	Wikipathways	WP4172	RPS6; CCNE2; CCNE1; EGFR; AKT1; COL6A1	207; 9134; 6194; 1291; 898; 1956	340	339
G0 and Early G1	5.03805e-06	5.57461e-05	Reactome	R-HSA-1538133	CCNE2; PCNA; CCNE1	9134; 5111; 898	25	25
Colorectal cancer - Homo sapiens (human)	5.10039e-06	5.57461e-05	KEGG	path:hsa05210	AKT1; MAPK8; EGFR; MSH6	207; 2956; 1956; 5599	86	86
Generic Transcription Pathway	5.16748e-06	5.57461e-05	Reactome	R-HSA-212436	PCNA; CCNB1; CDKN2A; CCNE2; ARID1A; CCNE1; EGFR; AKT1; AR	207; 891; 8289; 898; 367; 1029; 5111; 1956; 9134	1107	1099
PI3K-Akt signaling pathway - Homo sapiens (human)	5.42699e-06	5.62783e-05	KEGG	path:hsa04151	AKT1; CCNE2; CCNE1; EGFR; RPS6; COL6A1	6194; 207; 898; 9134; 1291; 1956	354	353
Cell Cycle	5.79296e-06	5.62783e-05	Reactome	R-HSA-1640170	PCNA; CCNB1; CDKN2A; CCNE2; CCNE1; AKT1; FOXM1	207; 2305; 891; 898; 1029; 5111; 9134	564	563
Androgen receptor signaling pathway	5.84915e-06	5.62783e-05	Wikipathways	WP138	AKT1; AR; EGFR; CCNE1	1956; 367; 207; 898	89	89
Pancreatic adenocarcinoma pathway	5.84915e-06	5.62783e-05	Wikipathways	WP4263	AKT1; MAPK8; CDKN2A; EGFR	1956; 5599; 1029; 207	89	89
ErbB Signaling Pathway	6.67633e-06	6.25466e-05	Wikipathways	WP673	PDK1; AKT1; MAPK8; EGFR	1956; 5599; 5163; 207	92	92
Transcriptional Regulation by TP53	7.22359e-06	6.59384e-05	Reactome	R-HSA-3700989	PCNA; CCNB1; CDKN2A; CCNE2; CCNE1; AKT1	207; 891; 898; 1029; 5111; 9134	374	371
Cyclin E associated events during G1/S transition	7.97624e-06	6.92571e-05	Reactome	R-HSA-69202	CCNE2; AKT1; CCNE1	9134; 207; 898	29	29
Cyclin A:Cdk2-associated events at S phase entry	7.97624e-06	6.92571e-05	Reactome	R-HSA-69656	CCNE2; AKT1; CCNE1	9134; 207; 898	29	29
HIF-1 signaling pathway - Homo sapiens (human)	9.30474e-06	7.70906e-05	KEGG	path:hsa04066	PDK1; RPS6; EGFR; AKT1	5163; 6194; 207; 1956	100	100
Human T-cell leukemia virus 1 infection - Homo sapiens (human)	9.31151e-06	7.70906e-05	KEGG	path:hsa05166	CCNE2; AKT1; MAPK8; CDKN2A; CCNE1	1029; 207; 5599; 898; 9134	219	219
S Phase	1.04641e-05	8.46643e-05	Reactome	R-HSA-69242	CCNE2; AKT1; CCNE1; PCNA	207; 898; 9134; 5111	103	103
Phosphorylation of proteins involved in G1/S transition by active Cyclin E:Cdk2 complexes	1.08586e-05	8.59036e-05	Reactome	R-HSA-69200	CCNE2; CCNE1	9134; 898	4	4
ErbB1 downstream signaling	1.17269e-05	8.8825e-05	PID	erbb1_downstream_pathway	AKT1; MAPK8; EGFR; RPS6	207; 1956; 5599; 6194	107	106
JAK-STAT	1.17269e-05	8.8825e-05	Wikipathways	WP2593	PDK1; AKT1; MAPK8; EGFR	1956; 5599; 5163; 207	106	106
RNA Polymerase II Transcription	1.29089e-05	9.57408e-05	Reactome	R-HSA-73857	PCNA; CCNB1; CDKN2A; CCNE2; ARID1A; CCNE1; EGFR; AKT1; AR	207; 891; 8289; 898; 367; 1029; 5111; 1956; 9134	1236	1228
DNA Damage Response (only ATM dependent)	1.35813e-05	9.86722e-05	Wikipathways	WP710	PDK1; AKT1; MAPK8; CDKN2A	5599; 207; 1029; 5163	110	110
Oocyte meiosis - Homo sapiens (human)	2.25047e-05	0.000160234	KEGG	path:hsa04114	CCNE2; CCNB1; AR; CCNE1	891; 367; 898; 9134	125	125
Fc Epsilon Receptor I Signaling in Mast Cells	2.47787e-05	0.000172965	SMPDB	SMP00358	PDK1; AKT1; MAPK8	5163; 207; 5599	42	42
FoxO signaling pathway - Homo sapiens (human)	2.70667e-05	0.000185303	KEGG	path:hsa04068	AKT1; MAPK8; EGFR; CCNB1	207; 5599; 891; 1956	132	131
Gene expression (Transcription)	3.03815e-05	0.000204072	Reactome	R-HSA-74160	PCNA; CCNB1; CDKN2A; CCNE2; ARID1A; CCNE1; EGFR; AKT1; AR	207; 891; 1029; 1956; 8289; 5111; 9134; 898; 367	1373	1364
Insulin signaling pathway - Homo sapiens (human)	3.22748e-05	0.000212775	KEGG	path:hsa04910	AKT1; MAPK8; FASN; RPS6	2194; 207; 6194; 5599	137	137
Thymic Stromal LymphoPoietin (TSLP) Signaling Pathway	3.48476e-05	0.000225559	Wikipathways	WP2203	AKT1; MAPK8; RPS6	207; 6194; 5599	47	47
AndrogenReceptor	3.8184e-05	0.000242741	NetPath	Pathway_AndrogenReceptor	AKT1; CCNE1; EGFR; AR	207; 1956; 898; 367	143	143
FoxO family signaling	4.20129e-05	0.000262396	PID	foxopathway	AKT1; MAPK8; CCNB1	207; 5599; 891	50	50
Gastric cancer - Homo sapiens (human)	4.48509e-05	0.000275292	KEGG	path:hsa05226	CCNE2; AKT1; CCNE1; EGFR	207; 898; 1956; 9134	149	149
Cushing syndrome - Homo sapiens (human)	5.10276e-05	0.000307895	KEGG	path:hsa04934	CCNE2; CDKN2A; EGFR; CCNE1	1029; 898; 1956; 9134	154	154
Signaling by PTK6	5.29838e-05	0.000309217	Reactome	R-HSA-8848021	AKT1; CCNE1; EGFR	207; 1956; 898	54	54
Signaling by Non-Receptor Tyrosine Kinases	5.29838e-05	0.000309217	Reactome	R-HSA-9006927	AKT1; CCNE1; EGFR	207; 1956; 898	54	54
EGF-EGFR Signaling Pathway	6.21757e-05	0.000357009	Wikipathways	WP437	PCNA; AKT1; MAPK8; EGFR	1956; 5599; 5111; 207	162	162
DNA Mismatch Repair	6.48846e-05	0.000365364	Wikipathways	WP531	PCNA; MSH6	5111; 2956	9	9
p53 pathway	6.56834e-05	0.000365364	PID	p53regulationpathway	AKT1; MAPK8; CDKN2A	207; 1029; 5599	58	58
Kit receptor signaling pathway	6.91422e-05	0.000378686	Wikipathways	WP304	AKT1; MAPK8; RPS6	207; 5599; 6194	59	59
Hepatocellular carcinoma - Homo sapiens (human)	7.16346e-05	0.000386393	KEGG	path:hsa05225	AKT1; ARID1A; CDKN2A; EGFR	1029; 8289; 207; 1956	168	168
Human papillomavirus infection - Homo sapiens (human)	7.60177e-05	0.000400046	KEGG	path:hsa05165	COL6A1; AKT1; CCNE1; EGFR; CCNE2	207; 1291; 1956; 898; 9134	339	339
Coregulation of Androgen receptor activity	7.64132e-05	0.000400046	PID	ar_pathway	AKT1; CDKN2A; AR	207; 367; 1029	61	61
Cellular responses to stress	8.14815e-05	0.000420397	Reactome	R-HSA-2262752	CCNE2; CDKN2A; CCNE1; MAPK8; AR	898; 1029; 9134; 367; 5599	345	344
Association Between Physico-Chemical Features and Toxicity Associated Pathways	9.24196e-05	0.000456963	Wikipathways	WP3680	AKT1; MAPK8; EGFR	207; 5599; 1956	65	65
Oncostatin M Signaling Pathway	9.24196e-05	0.000456963	Wikipathways	WP2374	AKT1; MAPK8; RPS6	207; 5599; 6194	65	65
Central carbon metabolism in cancer - Homo sapiens (human)	9.24196e-05	0.000456963	KEGG	path:hsa05230	PDK1; AKT1; EGFR	1956; 5163; 207	65	65
Human Thyroid Stimulating Hormone (TSH) signaling pathway	9.67366e-05	0.000459177	Wikipathways	WP2032	AKT1; CCNE1; RPS6	207; 898; 6194	66	66
AGE-RAGE pathway	9.67366e-05	0.000459177	Wikipathways	WP2324	AKT1; MAPK8; EGFR	207; 1956; 5599	66	66
Non-small cell lung cancer - Homo sapiens (human)	9.67366e-05	0.000459177	KEGG	path:hsa05223	AKT1; CDKN2A; EGFR	1029; 1956; 207	66	66
EGFR Inhibitor Pathway, Pharmacodynamics	0.000101183	0.000473965	PharmGKB	PA162356267	AKT1; MAPK8; EGFR	1956; 207; 5599	67	67
AMP-activated Protein Kinase (AMPK) Signaling	0.000105762	0.000476597	Wikipathways	WP1403	AKT1; CCNB1; FASN	891; 2194; 207	68	68
RAC1-PAK1-p38-MMP2 Pathway	0.000105762	0.000476597	Wikipathways	WP3303	AKT1; MAPK8; EGFR	5599; 207; 1956	68	68
DNA Damage Response	0.000105762	0.000476597	Wikipathways	WP707	CCNE2; CCNB1; CCNE1	9134; 891; 898	68	68
Cellular Senescence	0.000110831	0.000493197	Reactome	R-HSA-2559583	CCNE2; MAPK8; CCNE1; CDKN2A	898; 9134; 5599; 1029	189	188
Prolactin	0.00011532	0.000506838	NetPath	Pathway_Prolactin	AKT1; MAPK8; EGFR	207; 1956; 5599	70	70
Alpha6Beta4Integrin	0.000120303	0.000516	NetPath	Pathway_Alpha6Beta4Integrin	AKT1; AR; EGFR	207; 367; 1956	71	71
Glioma - Homo sapiens (human)	0.000120303	0.000516	KEGG	path:hsa05214	AKT1; CDKN2A; EGFR	1029; 207; 1956	71	71
Melanoma - Homo sapiens (human)	0.000125425	0.00052531	KEGG	path:hsa05218	AKT1; CDKN2A; EGFR	207; 1029; 1956	72	72
Androgen Receptor Network in Prostate Cancer	0.000125425	0.00052531	Wikipathways	WP2263	ARID1A; AR; MAPK8	367; 8289; 5599	72	72
Chromosomal and microsatellite instability in colorectal cancer	0.000130687	0.000540984	Wikipathways	WP4216	AKT1; MAPK8; MSH6	207; 2956; 5599	73	73
IL6	0.000136091	0.000548081	NetPath	Pathway_IL6	AKT1; MAPK8; AR	207; 5599; 367	74	74
Focal adhesion - Homo sapiens (human)	0.000138062	0.000548081	KEGG	path:hsa04510	COL6A1; AKT1; MAPK8; EGFR	207; 1291; 1956; 5599	199	199
p53 signaling pathway	0.000140122	0.000548081	BioCarta	p53pathway	PCNA; CCNE1	898; 5111	13	13
Epstein-Barr virus infection - Homo sapiens (human)	0.000140758	0.000548081	KEGG	path:hsa05169	CCNE2; AKT1; MAPK8; CCNE1	207; 5599; 898; 9134	201	200
Transcriptional regulation by RUNX2	0.000141639	0.000548081	Reactome	R-HSA-8878166	AKT1; CCNB1; AR	207; 891; 367	75	75
Synthesis of DNA	0.000141639	0.000548081	Reactome	R-HSA-69239	CCNE2; PCNA; CCNE1	9134; 5111; 898	75	75
Leptin signaling pathway	0.000147332	0.00055798	Wikipathways	WP2034	AKT1; MAPK8; RPS6	207; 5599; 6194	76	76
Prolactin Signaling Pathway	0.000147332	0.00055798	Wikipathways	WP2037	AKT1; MAPK8; RPS6	207; 6194; 5599	76	76
Mismatch repair (MMR) directed by MSH2:MSH6 (MutSalpha)	0.000163342	0.000599482	Reactome	R-HSA-5358565	PCNA; MSH6	2956; 5111	15	14
fig-met-1-last-solution	0.000163342	0.000599482	Wikipathways	WP3961	PDK1; FASN	5163; 2194	14	14
TP53 Regulates Transcription of Genes Involved in G1 Cell Cycle Arrest	0.000163342	0.000599482	Reactome	R-HSA-6804116	CCNE2; CCNE1	9134; 898	14	14
p73 transcription factor network	0.0001653	0.000600478	PID	p73pathway	CCNE2; CCNB1; FASN	891; 9134; 2194	79	79
DNA Replication	0.000171592	0.000617037	Reactome	R-HSA-69306	PCNA; CCNE2; CCNE1	5111; 898; 9134	80	80
Mismatch Repair	0.000188317	0.000670408	Reactome	R-HSA-5358508	PCNA; MSH6	2956; 5111	16	15
Cellular responses to external stimuli	0.000192642	0.000679016	Reactome	R-HSA-8953897	CCNE2; CDKN2A; CCNE1; MAPK8; AR	898; 1029; 9134; 367; 5599	414	413
ErbB signaling pathway - Homo sapiens (human)	0.00020539	0.000716851	KEGG	path:hsa04012	AKT1; MAPK8; EGFR	1956; 207; 5599	85	85
Pathways in clear cell renal cell carcinoma	0.000212629	0.000734913	Wikipathways	WP4018	FASN; EGFR; AKT1	1956; 2194; 207	86	86
Polo-like kinase mediated events	0.000215043	0.000736107	Reactome	R-HSA-156711	CCNB1; FOXM1	2305; 891	16	16
miRNA Regulation of DNA Damage Response	0.000235336	0.000797903	Wikipathways	WP1530	CCNE2; CCNB1; CCNE1	9134; 891; 898	89	89
Activation of E2F1 target genes at G1/S	0.000243515	0.000810199	Reactome	R-HSA-539107	PCNA; CCNE1	5111; 898	17	17
G1/S-Specific Transcription	0.000243515	0.000810199	Reactome	R-HSA-69205	PCNA; CCNE1	5111; 898	17	17
TNFalpha	0.000257228	0.0008479	NetPath	Pathway_TNFalpha	PDK1; AKT1; MAPK8; EGFR	207; 1956; 5599; 5163	234	234
Small cell lung cancer - Homo sapiens (human)	0.000267981	0.000875241	KEGG	path:hsa05222	CCNE2; AKT1; CCNE1	207; 898; 9134	93	93
TP53 Regulates Transcription of Genes Involved in G2 Cell Cycle Arrest	0.000273729	0.000877907	Reactome	R-HSA-6804114	PCNA; CCNB1	891; 5111	18	18
SCF(Skp2)-mediated degradation of p27/p21	0.000273729	0.000877907	Reactome	R-HSA-187577	CCNE2; CCNE1	9134; 898	18	18
ATM Signaling Pathway	0.000305682	0.000971632	Wikipathways	WP2516	CCNB1; CCNE1	891; 898	19	19
Progesterone-mediated oocyte maturation - Homo sapiens (human)	0.00032223	0.00100626	KEGG	path:hsa04914	AKT1; CCNB1; MAPK8	207; 891; 5599	99	99
Choline metabolism in cancer - Homo sapiens (human)	0.00032223	0.00100626	KEGG	path:hsa05231	AKT1; MAPK8; EGFR	207; 1956; 5599	99	99
Cell Cycle Checkpoints	0.000326043	0.00100931	Reactome	R-HSA-69620	CCNE2; CDKN2A; CCNE1; CCNB1	898; 9134; 1029; 891	250	249
Mitotic G1-G1-S phases	0.000339368	0.00102386	Wikipathways	WP1858	PCNA; CCNE1	5111; 898	20	20
Hereditary leiomyomatosis and renal cell carcinoma pathway	0.000339368	0.00102386	Wikipathways	WP4206	PDK1; RPS6	5163; 6194	20	20
egf signaling pathway	0.000339368	0.00102386	BioCarta	egfpathway	MAPK8; EGFR	5599; 1956	20	20
E-cadherin signaling in keratinocytes	0.000374783	0.00110267	PID	ecadherin_keratinocyte_pathway	AKT1; EGFR	207; 1956	21	21
TSLP	0.000374783	0.00110267	NetPath	Pathway_TSLP	AKT1; MAPK8	207; 5599	21	21
Neovascularisation processes	0.000374783	0.00110267	Wikipathways	WP4331	AKT1; MAPK8	5599; 207	21	21
inhibition of cellular proliferation by gleevec	0.000411923	0.00119223	BioCarta	gleevecpathway	AKT1; MAPK8	207; 5599	22	22
hypoxia and p53 in the cardiovascular system	0.000411923	0.00119223	BioCarta	p53hypoxiapathway	AKT1; MAPK8	207; 5599	22	22
IL11	0.000450784	0.00128383	NetPath	Pathway_IL11	AKT1; RPS6	207; 6194	23	23
Mismatch repair - Homo sapiens (human)	0.000450784	0.00128383	KEGG	path:hsa03430	PCNA; MSH6	2956; 5111	23	23
tumor suppressor arf inhibits ribosomal biogenesis	0.000491361	0.00138829	BioCarta	arfpathway	AKT1; CDKN2A	207; 1029	24	24
Relationship between inflammation, COX-2 and EGFR	0.00053365	0.00143924	Wikipathways	WP4483	AKT1; EGFR	207; 1956	25	25
skeletal muscle hypertrophy is regulated via akt-mtor pathway	0.00053365	0.00143924	BioCarta	igf1mtorpathway	AKT1; RPS6	207; 6194	25	25
mtor signaling pathway	0.00053365	0.00143924	BioCarta	mtorpathway	AKT1; RPS6	207; 6194	25	25
Cyclin A/B1/B2 associated events during G2/M transition	0.00053365	0.00143924	Reactome	R-HSA-69273	CCNB1; FOXM1	891; 2305	25	25
cell cycle: g1/s check point	0.00053365	0.00143924	BioCarta	g1pathway	CDKN2A; CCNE1	898; 1029	25	25
Gap-filling DNA repair synthesis and ligation in GG-NER	0.00053365	0.00143924	Reactome	R-HSA-5696397	PCNA; XRCC1	5111; 7515	25	25
Steatosis AOP	0.000577646	0.00153464	Wikipathways	WP4011	AKT1; FASN	2194; 207	26	26
EPO Receptor Signaling	0.000577646	0.00153464	Wikipathways	WP581	PDK1; AKT1	5163; 207	26	26
Follicle Stimulating Hormone (FSH) signaling pathway	0.000623346	0.00164379	Wikipathways	WP2035	AKT1; RPS6	207; 6194	27	27
MicroRNAs in cancer - Homo sapiens (human)	0.000651718	0.00166983	KEGG	path:hsa05206	CCNE2; CDKN2A; EGFR; CCNE1	1029; 898; 9134; 1956	299	299
influence of ras and rho proteins on g1 to s transition	0.000670746	0.00166983	BioCarta	raccycdpathway	AKT1; CCNE1	207; 898	28	28
role of erbb2 in signal transduction and oncology	0.000670746	0.00166983	BioCarta	her2pathway	AKT1; EGFR	207; 1956	28	28
Reelin signaling pathway	0.000670746	0.00166983	PID	reelinpathway	AKT1; MAPK8	207; 5599	28	28
TWEAK	0.000670746	0.00166983	NetPath	Pathway_TWEAK	AKT1; MAPK8	207; 5599	28	28
EGF	0.000670746	0.00166983	INOH	None	MAPK8; EGFR	1956; 5599	28	28
DNA Damage/Telomere Stress Induced Senescence	0.000670746	0.00166983	Reactome	R-HSA-2559586	CCNE2; CCNE1	9134; 898	28	28
CDK-mediated phosphorylation and removal of Cdc6	0.000670746	0.00166983	Reactome	R-HSA-69017	CCNE2; CCNE1	9134; 898	28	28
BCR	0.000699592	0.00171989	NetPath	Pathway_BCR	AKT1; MAPK8; RPS6	207; 5599; 6194	129	129
Relaxin signaling pathway - Homo sapiens (human)	0.000715498	0.00171989	KEGG	path:hsa04926	AKT1; MAPK8; EGFR	207; 1956; 5599	130	130
Downregulation of ERBB2 signaling	0.00071984	0.00171989	Reactome	R-HSA-8863795	AKT1; EGFR	207; 1956	29	29
Nephrin/Neph1 signaling in the kidney podocyte	0.00071984	0.00171989	PID	nephrin_neph1_pathway	AKT1; MAPK8	207; 5599	29	29
Lipid Metabolism Pathway	0.00071984	0.00171989	Wikipathways	WP3965	AKT1; FASN	2194; 207	29	29
BARD1 signaling events	0.00071984	0.00171989	PID	bard1pathway	PCNA; CCNE1	5111; 898	29	29
Measles - Homo sapiens (human)	0.000731633	0.00172491	KEGG	path:hsa05162	CCNE2; AKT1; CCNE1	207; 898; 9134	132	131
Angiopoietin Like Protein 8 Regulatory Pathway	0.000731633	0.00172491	Wikipathways	WP3915	AKT1; MAPK8; FASN	5599; 2194; 207	131	131
TGF-beta Signaling Pathway	0.000747999	0.00173634	Wikipathways	WP366	PDK1; AKT1; MAPK8	5599; 5163; 207	132	132
Extracellular vesicle-mediated signaling in recipient cells	0.000770624	0.00173634	Wikipathways	WP2870	AKT1; EGFR	207; 1956	30	30
Retinoic acid receptors-mediated signaling	0.000770624	0.00173634	PID	retinoic_acid_pathway	AKT1; MAPK8	207; 5599	30	30
Activation of BH3-only proteins	0.000770624	0.00173634	Reactome	R-HSA-114452	AKT1; MAPK8	207; 5599	30	30
Factors and pathways affecting insulin-like growth factor (IGF1)-Akt signaling	0.000770624	0.00173634	Wikipathways	WP3850	PDK1; AKT1	5163; 207	30	30
PI3K-AKT-mTOR signaling pathway and therapeutic opportunities	0.000770624	0.00173634	Wikipathways	WP3844	PDK1; AKT1	5163; 207	30	30
T-Cell Receptor and Co-stimulatory Signaling	0.000770624	0.00173634	Wikipathways	WP2583	PDK1; AKT1	5163; 207	30	30
DNA Repair	0.000811545	0.00181704	Reactome	R-HSA-73894	XRCC1; PCNA; MAPK8; MSH6	7515; 5599; 5111; 2956	320	317
Nongenotropic Androgen signaling	0.000823095	0.00182001	PID	ar_nongenomic_pathway	AKT1; AR	207; 367	31	31
Tumor suppressor activity of SMARCB1	0.000823095	0.00182001	Wikipathways	WP4204	ARID1A; CDKN2A	8289; 1029	31	31
Direct p53 effectors	0.000924664	0.00203198	PID	p53downstreampathway	PCNA; CCNB1; EGFR	1956; 5111; 891	143	142
Base excision repair - Homo sapiens (human)	0.000933079	0.00203789	KEGG	path:hsa03410	XRCC1; PCNA	7515; 5111	33	33
Brain-Derived Neurotrophic Factor (BDNF) signaling pathway	0.000962903	0.0020902	Wikipathways	WP2380	RPS6; MAPK8; AKT1	5599; 6194; 207	144	144
CD40/CD40L signaling	0.000990584	0.00213726	PID	cd40_pathway	AKT1; MAPK8	207; 5599	34	34
FAS (CD95) signaling pathway	0.00104976	0.00223781	PID	faspathway	AKT1; MAPK8	207; 5599	35	35
angiotensin ii mediated activation of jnk pathway via pyk2 dependent signaling	0.00104976	0.00223781	BioCarta	at1rpathway	MAPK8; EGFR	1956; 5599	35	35
Regulation of TP53 Degradation	0.0011106	0.00233948	Reactome	R-HSA-6804757	AKT1; CDKN2A	207; 1029	36	36
CRH	0.0011106	0.00233948	NetPath	Pathway_CRH	AKT1; MAPK8	207; 5599	36	36
Regulation of TP53 Expression and Degradation	0.0011731	0.00240013	Reactome	R-HSA-6806003	AKT1; CDKN2A	207; 1029	37	37
trefoil factors initiate mucosal healing	0.0011731	0.00240013	BioCarta	tffpathway	AKT1; EGFR	207; 1956	37	37
IL2 signaling events mediated by PI3K	0.0011731	0.00240013	PID	il2_pi3kpathway	AKT1; RPS6	207; 6194	37	37
Resolution of Abasic Sites (AP sites)	0.0011731	0.00240013	Reactome	R-HSA-73933	PCNA; XRCC1	5111; 7515	37	37
Base Excision Repair	0.0011731	0.00240013	Reactome	R-HSA-73884	PCNA; XRCC1	5111; 7515	37	37
Intracellular Signalling Through Adenosine Receptor A2a and Adenosine	0.00123725	0.00250263	SMPDB	SMP00320	AKT1; MAPK8	5599; 207	38	38
Intracellular Signalling Through Adenosine Receptor A2b and Adenosine	0.00123725	0.00250263	SMPDB	SMP00321	AKT1; MAPK8	5599; 207	38	38
Association of TriC/CCT with target proteins during biosynthesis	0.00130306	0.00261082	Reactome	R-HSA-390471	CCNE2; CCNE1	9134; 898	39	39
Epithelial to mesenchymal transition in colorectal cancer	0.00130541	0.00261082	Wikipathways	WP4239	AKT1; MAPK8; FOXM1	5599; 2305; 207	160	160
ErbB2/ErbB3 signaling events	0.00137052	0.0026808	PID	erbb2erbb3pathway	AKT1; MAPK8	207; 5599	40	40
mTOR signalling	0.00137052	0.0026808	Reactome	R-HSA-165159	AKT1; RPS6	207; 6194	41	40
Bladder Cancer	0.00137052	0.0026808	Wikipathways	WP2828	CDKN2A; EGFR	1956; 1029	40	40
IL-5 Signaling Pathway	0.00137052	0.0026808	Wikipathways	WP127	RPS6; AKT1	6194; 207	40	40
TNF related weak inducer of apoptosis (TWEAK) Signaling Pathway	0.00143962	0.00278536	Wikipathways	WP2036	AKT1; MAPK8	207; 5599	41	41
Bladder cancer - Homo sapiens (human)	0.00143962	0.00278536	KEGG	path:hsa05219	CDKN2A; EGFR	1029; 1956	41	41
DNA Double-Strand Break Repair	0.00147655	0.00284135	Reactome	R-HSA-5693532	XRCC1; PCNA; MAPK8	7515; 5599; 5111	169	167
IL-2 Signaling Pathway	0.00151037	0.00289081	Wikipathways	WP49	AKT1; RPS6	207; 6194	42	42
Intrinsic Pathway for Apoptosis	0.00158274	0.00301314	Reactome	R-HSA-109606	AKT1; MAPK8	207; 5599	43	43
nfat and hypertrophy of the heart	0.00165675	0.00312066	BioCarta	nfatpathway	AKT1; MAPK8	207; 5599	44	44
Interleukin-11 Signaling Pathway	0.00165675	0.00312066	Wikipathways	WP2332	AKT1; RPS6	207; 6194	44	44
a6b1 and a6b4 Integrin signaling	0.00173239	0.00322896	PID	a6b1_a6b4_integrin_pathway	AKT1; EGFR	207; 1956	45	45
PDGF	0.00173239	0.00322896	INOH	None	AKT1; MAPK8	207; 5599	45	45
BDNF	0.00180965	0.00333801	NetPath	Pathway_BDNF	AKT1; MAPK8	207; 5599	46	46
Switching of origins to a post-replicative state	0.00180965	0.00333801	Reactome	R-HSA-69052	CCNE2; CCNE1	9134; 898	46	46
Validated transcriptional targets of deltaNp63 isoforms	0.00188853	0.00346556	PID	deltanp63pathway	CDKN2A; FASN	2194; 1029	48	47
IL-7 signaling	0.0019493	0.00354027	INOH	None	AKT1; MAPK8; EGFR	207; 1956; 5599	185	184
Ras Signaling	0.0019493	0.00354027	Wikipathways	WP4223	AKT1; MAPK8; EGFR	1956; 5599; 207	184	184
Ceramide signaling pathway	0.00196903	0.00354027	PID	ceramide_pathway	AKT1; MAPK8	207; 5599	48	48
agrin in postsynaptic differentiation	0.00196903	0.00354027	BioCarta	agrpathway	MAPK8; EGFR	1956; 5599	48	48
EPO signaling	0.00197972	0.00354161	INOH	None	AKT1; MAPK8; EGFR	207; 1956; 5599	186	185
VEGF	0.00204144	0.00363286	INOH	None	AKT1; MAPK8; EGFR	207; 1956; 5599	188	187
IL-3 Signaling Pathway	0.00205113	0.00363286	Wikipathways	WP286	AKT1; MAPK8	207; 5599	49	49
Signaling by ERBB2	0.00213485	0.00374387	Reactome	R-HSA-1227986	AKT1; EGFR	207; 1956	50	50
Angiopoietin receptor Tie2-mediated signaling	0.00213485	0.00374387	PID	angiopoietinreceptor_pathway	AKT1; MAPK8	207; 5599	50	50
Wnt Signaling Pathway	0.00222016	0.00385551	Wikipathways	WP363	AKT1; MAPK8	207; 5599	51	51
Regulation of Androgen receptor activity	0.00222016	0.00385551	PID	ar_tf_pathway	MAPK8; AR	367; 5599	51	51
Signaling events mediated by Stem cell factor receptor (c-Kit)	0.00230708	0.00398699	PID	kitpathway	AKT1; MAPK8	207; 5599	52	52
Signaling events mediated by PTP1B	0.00239559	0.00409224	PID	ptp1bpathway	AKT1; EGFR	207; 1956	53	53
keratinocyte differentiation	0.00239559	0.00409224	BioCarta	keratinocytepathway	MAPK8; EGFR	1956; 5599	53	53
Focal Adhesion	0.00240247	0.00409224	Wikipathways	WP306	AKT1; MAPK8; EGFR	5599; 207; 1956	198	198
Cardiac Hypertrophic Response	0.00248569	0.00419073	Wikipathways	WP2795	AKT1; MAPK8	207; 5599	54	54
IL1	0.00248569	0.00419073	NetPath	Pathway_IL1	AKT1; MAPK8	207; 5599	54	54
Viral carcinogenesis - Homo sapiens (human)	0.00250738	0.00419073	KEGG	path:hsa05203	CCNE2; CDKN2A; CCNE1	1029; 898; 9134	201	201
Proteoglycans in cancer - Homo sapiens (human)	0.00250738	0.00419073	KEGG	path:hsa05205	RPS6; EGFR; AKT1	6194; 207; 1956	201	201
RANKL-RANK (Receptor activator of NFKB (ligand)) Signaling Pathway	0.00257738	0.00426766	Wikipathways	WP2018	AKT1; MAPK8	207; 5599	55	55
IL-1 signaling pathway	0.00257738	0.00426766	Wikipathways	WP195	AKT1; MAPK8	207; 5599	55	55
Thromboxane A2 receptor signaling	0.00267065	0.00438133	PID	txa2pathway	AKT1; EGFR	207; 1956	57	56
Hepatitis C and Hepatocellular Carcinoma	0.00267065	0.00438133	Wikipathways	WP3646	AKT1; MAPK8	5599; 207	56	56
Endometrial cancer - Homo sapiens (human)	0.00286191	0.00465224	KEGG	path:hsa05213	AKT1; EGFR	1956; 207	58	58
Celecoxib Pathway, Pharmacodynamics	0.00286191	0.00465224	PharmGKB	PA152241951	PDK1; AKT1	5163; 207	58	58
Human immunodeficiency virus 1 infection - Homo sapiens (human)	0.00291634	0.00471916	KEGG	path:hsa05170	AKT1; CCNB1; MAPK8	891; 207; 5599	212	212
MET in type 1 papillary renal cell carcinoma	0.00295991	0.00476799	Wikipathways	WP4205	AKT1; MAPK8	207; 5599	59	59
Angiogenesis overview	0.00316059	0.0050456	Wikipathways	WP1993	AKT1; MAPK8	207; 5599	61	61
VEGF Signaling Pathway	0.00316059	0.0050456	PharmGKB	PA2032	AKT1; MAPK8	5599; 207	61	61
Fc-epsilon receptor I signaling in mast cells	0.00326326	0.00518626	PID	fcer1pathway	AKT1; MAPK8	207; 5599	62	62
Integrins in angiogenesis	0.0033675	0.00518973	PID	avb3_integrin_pathway	COL6A1; AKT1	207; 1291	63	63
Endometrial cancer	0.0033675	0.00518973	Wikipathways	WP4155	AKT1; EGFR	207; 1956	63	63
LPA receptor mediated events	0.0033675	0.00518973	PID	lysophospholipid_pathway	AKT1; EGFR	207; 1956	64	63
IL4	0.0033675	0.00518973	NetPath	Pathway_IL4	AKT1; MAPK8	207; 5599	63	63
MECP2 and Associated Rett Syndrome	0.0033675	0.00518973	Wikipathways	WP3584	AKT1; RPS6	207; 6194	63	63
T-Cell antigen Receptor (TCR) pathway during Staphylococcus aureus infection	0.0033675	0.00518973	Wikipathways	WP3863	PDK1; AKT1	5163; 207	63	63
Pathways Affected in Adenoid Cystic Carcinoma	0.0033675	0.00518973	Wikipathways	WP3651	AKT1; ARID1A	8289; 207	63	63
Human cytomegalovirus infection - Homo sapiens (human)	0.00345018	0.00526165	KEGG	path:hsa05163	AKT1; CDKN2A; EGFR	1029; 207; 1956	225	225
mTOR signaling pathway	0.00347328	0.00526165	PID	mtor_4pathway	AKT1; CCNE1	207; 898	65	64
Endothelins	0.00347328	0.00526165	PID	endothelinpathway	AKT1; MAPK8	207; 5599	64	64
Regulation of retinoblastoma protein	0.00347328	0.00526165	PID	rb_1pathway	CDKN2A; CCNE1	898; 1029	64	64
Ras signaling pathway - Homo sapiens (human)	0.00376097	0.00567333	KEGG	path:hsa04014	AKT1; MAPK8; EGFR	207; 5599; 1956	232	232
Fc epsilon RI signaling pathway - Homo sapiens (human)	0.00379989	0.00570785	KEGG	path:hsa04664	AKT1; MAPK8	207; 5599	68	67
Regulation of Telomerase	0.00391183	0.00573091	PID	telomerasepathway	AKT1; EGFR	207; 1956	68	68
BCR signaling pathway	0.00391183	0.00573091	PID	bcr_5pathway	AKT1; MAPK8	207; 5599	68	68
Wnt	0.00391183	0.00573091	NetPath	Pathway_Wnt	AKT1; MAPK8	207; 5599	69	68
Epithelial cell signaling in Helicobacter pylori infection - Homo sapiens (human)	0.00391183	0.00573091	KEGG	path:hsa05120	MAPK8; EGFR	1956; 5599	68	68
Sterol Regulatory Element-Binding Proteins (SREBP) signalling	0.00391183	0.00573091	Wikipathways	WP1982	AKT1; FASN	2194; 207	68	68
Gap-filling DNA repair synthesis and ligation in TC-NER	0.00391183	0.00573091	Reactome	R-HSA-6782210	PCNA; XRCC1	5111; 7515	68	68
VEGFA-VEGFR2 Signaling Pathway	0.00394605	0.00575734	Wikipathways	WP3888	RPS6; MAPK8; AKT1	5599; 6194; 207	236	236
Adipocytokine signaling pathway - Homo sapiens (human)	0.0040253	0.00584901	KEGG	path:hsa04920	AKT1; MAPK8	5599; 207	69	69
Prolactin signaling pathway - Homo sapiens (human)	0.0041403	0.00594334	KEGG	path:hsa04917	AKT1; MAPK8	207; 5599	70	70
p75(NTR)-mediated signaling	0.0041403	0.00594334	PID	p75ntrpathway	AKT1; MAPK8	207; 5599	71	70
KitReceptor	0.0041403	0.00594334	NetPath	Pathway_KitReceptor	RPS6; MAPK8	6194; 5599	70	70
Parkinsons Disease Pathway	0.00425683	0.00608606	Wikipathways	WP2371	CCNE2; CCNE1	9134; 898	71	71
MAPK Signaling Pathway	0.00443296	0.00631253	Wikipathways	WP382	AKT1; MAPK8; EGFR	5599; 207; 1956	246	246
Primary Focal Segmental Glomerulosclerosis FSGS	0.00449442	0.00637456	Wikipathways	WP2572	PCNA; AKT1	5111; 207	73	73
Fibroblast growth factor-1	0.00461548	0.00652029	NetPath	Pathway_Fibroblast__growth__factor-1	AKT1; MAPK8	207; 5599	74	74
Chronic myeloid leukemia - Homo sapiens (human)	0.00486213	0.00684157	KEGG	path:hsa05220	AKT1; CDKN2A	1029; 207	76	76
Regulation of nuclear SMAD2/3 signaling	0.0049877	0.00699064	PID	smad2_3nuclearpathway	AKT1; AR	207; 367	78	77
insulin	0.00511477	0.00714062	INOH	None	RPS6; AKT1	6194; 207	78	78
Glucocorticoid receptor regulatory network	0.00537337	0.00744327	PID	reg_gr_pathway	AKT1; MAPK8	207; 5599	80	80
Regulation of nuclear beta catenin signaling and target gene transcription	0.00537337	0.00744327	PID	betacatenin_nuc_pathway	CDKN2A; AR	367; 1029	80	80
Signaling events mediated by Hepatocyte Growth Factor Receptor (c-Met)	0.0055049	0.00756658	PID	met_pathway	AKT1; MAPK8	207; 5599	82	81
Transcription-Coupled Nucleotide Excision Repair (TC-NER)	0.0055049	0.00756658	Reactome	R-HSA-6781827	PCNA; XRCC1	5111; 7515	81	81
insulin Mam	0.0056379	0.00771959	INOH	None	RPS6; AKT1	6194; 207	82	82
Global Genome Nucleotide Excision Repair (GG-NER)	0.00590834	0.00805888	Reactome	R-HSA-5696399	PCNA; XRCC1	5111; 7515	84	84
C-MYB transcription factor network	0.00604576	0.00821485	PID	cmyb_pathway	CCNB1; CDKN2A	1029; 891	85	85
Apoptosis	0.00632499	0.00856158	Wikipathways	WP254	AKT1; CDKN2A	1029; 207	87	87
Apoptosis Modulation and Signaling	0.00690088	0.00930574	Wikipathways	WP1772	MAPK8; CDKN2A	5599; 1029	91	91
Corticotropin-releasing hormone signaling pathway	0.00704847	0.00943329	Wikipathways	WP2355	AKT1; MAPK8	5599; 207	92	92
T-Cell antigen Receptor (TCR) Signaling Pathway	0.00704847	0.00943329	Wikipathways	WP69	AKT1; MAPK8	5599; 207	92	92
GnRH signaling pathway - Homo sapiens (human)	0.00719749	0.00956085	KEGG	path:hsa04912	MAPK8; EGFR	1956; 5599	93	93
TNF alpha Signaling Pathway	0.00719749	0.00956085	Wikipathways	WP231	AKT1; MAPK8	5599; 207	93	93
MAPK signaling pathway - Homo sapiens (human)	0.00734171	0.0096884	KEGG	path:hsa04010	AKT1; MAPK8; EGFR	207; 1956; 5599	295	295
PI3K/AKT Signaling in Cancer	0.00734794	0.0096884	Reactome	R-HSA-2219528	AKT1; EGFR	207; 1956	94	94
PI5P, PP2A and IER3 Regulate PI3K/AKT Signaling	0.00780787	0.0102119	Reactome	R-HSA-6811558	AKT1; EGFR	207; 1956	97	97
Chaperonin-mediated protein folding	0.00780787	0.0102119	Reactome	R-HSA-390466	CCNE2; CCNE1	898; 9134	97	97
Focal Adhesion-PI3K-Akt-mTOR-signaling pathway	0.00783106	0.0102119	Wikipathways	WP3932	AKT1; EGFR; RPS6	207; 6194; 1956	302	302
B Cell Receptor Signaling Pathway	0.00796402	0.0103474	Wikipathways	WP23	AKT1; MAPK8	5599; 207	98	98
AGE-RAGE signaling pathway in diabetic complications - Homo sapiens (human)	0.00812158	0.0105138	KEGG	path:hsa04933	AKT1; MAPK8	207; 5599	99	99
JAK STAT pathway and regulation	0.00833948	0.0107567	INOH	None	AKT1; MAPK8; EGFR	207; 1956; 5599	310	309
Chagas disease (American trypanosomiasis) - Homo sapiens (human)	0.00860271	0.0109769	KEGG	path:hsa05142	AKT1; MAPK8	207; 5599	102	102
Toll-like Receptor Signaling Pathway	0.00860271	0.0109769	Wikipathways	WP75	AKT1; MAPK8	5599; 207	102	102
MicroRNAs in cardiomyocyte hypertrophy	0.00860271	0.0109769	Wikipathways	WP1544	AKT1; MAPK8	5599; 207	102	102
Protein folding	0.0087659	0.0111452	Reactome	R-HSA-391251	CCNE2; CCNE1	898; 9134	103	103
Negative regulation of the PI3K/AKT network	0.00893047	0.0111945	Reactome	R-HSA-199418	AKT1; EGFR	207; 1956	104	104
C-type lectin receptor signaling pathway - Homo sapiens (human)	0.00893047	0.0111945	KEGG	path:hsa04625	AKT1; MAPK8	207; 5599	104	104
Toll-like receptor signaling pathway - Homo sapiens (human)	0.00893047	0.0111945	KEGG	path:hsa04620	AKT1; MAPK8	207; 5599	104	104
JAK-STAT-Core	0.00893047	0.0111945	Signalink	None	MAPK8; EGFR	1956; 5599	104	104
EGF-Core	0.00909644	0.0113626	Signalink	None	MAPK8; EGFR	1956; 5599	105	105
Developmental Biology	0.00914939	0.0113887	Reactome	R-HSA-1266738	COL6A1; AKT1; MAPK8; EGFR	207; 1291; 1956; 5599	620	619
Senescence and Autophagy in Cancer	0.0092638	0.011491	Wikipathways	WP615	PCNA; CDKN2A	1029; 5111	106	106
Insulin resistance - Homo sapiens (human)	0.00943254	0.0116597	KEGG	path:hsa04931	AKT1; MAPK8	207; 5599	107	107
Thermogenesis	0.00960266	0.0118289	Wikipathways	WP4321	RPS6; ARID1A	8289; 6194	108	108
TNF signaling pathway - Homo sapiens (human)	0.00994702	0.0122108	KEGG	path:hsa04668	AKT1; MAPK8	207; 5599	110	110

## Sheet: TNBC common pathways
Common enriched pathways in CREBBPaltered TNBC in both GEX and RPPA data
FOXM1 transcription factor network
Mitotic G1-G1/S phases
G1 to S cell cycle control
G1/S Transition
Cellular senescence - Homo sapiens (human)
Retinoblastoma Gene in Cancer
Prostate cancer - Homo sapiens (human)
Pathways in cancer - Homo sapiens (human)
Cell Cycle
Cell cycle - Homo sapiens (human)
Photodynamic therapy-induced AP-1 survival signaling.
TP53 Regulates Transcription of Cell Cycle Genes
Cell Cycle, Mitotic
p53 signaling pathway - Homo sapiens (human)
p53-Dependent G1 DNA Damage Response
p53-Dependent G1/S DNA damage checkpoint
TGF_beta_Receptor
E2F transcription factor network
cyclins and cell cycle regulation
G1/S DNA Damage Checkpoints
G0 and Early G1
Generic Transcription Pathway
Androgen receptor signaling pathway
Transcriptional Regulation by TP53
Human T-cell leukemia virus 1 infection - Homo sapiens (human)
S Phase
RNA Polymerase II Transcription
Oocyte meiosis - Homo sapiens (human)
Gene expression (Transcription)
Human papillomavirus infection - Homo sapiens (human)
DNA Damage Response
Synthesis of DNA
TP53 Regulates Transcription of Genes Involved in G1 Cell Cycle Arrest
DNA Replication
Polo-like kinase mediated events
miRNA Regulation of DNA Damage Response
Activation of E2F1 target genes at G1/S
G1/S-Specific Transcription
ATM Signaling Pathway
Progesterone-mediated oocyte maturation - Homo sapiens (human)
Cell Cycle Checkpoints
Mitotic G1-G1-S phases
Neovascularisation processes
Cyclin A/B1/B2 associated events during G2/M transition
DNA Repair
Direct p53 effectors
Regulation of TP53 Degradation
Regulation of TP53 Expression and Degradation
Resolution of Abasic Sites (AP sites)
Base Excision Repair
DNA Double-Strand Break Repair
Switching of origins to a post-replicative state
LPA receptor mediated events
MECP2 and Associated Rett Syndrome
Endothelins
Regulation of retinoblastoma protein
Regulation of Telomerase
VEGFA-VEGFR2 Signaling Pathway
Global Genome Nucleotide Excision Repair (GG-NER)

## Sheet: BLCA Pheno data
Patient ID	Profiled in Mutations	Profiled in Putative copy-number alterations from GISTIC	CREBBPalterations
TCGA-5N-A9KI		Yes	Deep Deletion
TCGA-BT-A0S7	Yes	Yes	Deep Deletion
TCGA-C4-A0F6	Yes	Yes	Deep Deletion
TCGA-DK-AA76		Yes	Deep Deletion
TCGA-FD-A5BR	Yes	Yes	Deep Deletion
TCGA-G2-A2EF	Yes	Yes	Deep Deletion
TCGA-GV-A3QI	Yes	Yes	Deep Deletion
TCGA-KQ-A41P	Yes	Yes	Deep Deletion
TCGA-XF-A9SX		Yes	Deep Deletion
TCGA-DK-A1A3	Yes	Yes	Shallow Deletion
TCGA-FD-A3SP	Yes	Yes	Shallow Deletion
TCGA-BT-A3PJ	Yes	Yes	Shallow Deletion
TCGA-2F-A9KO		Yes	Shallow Deletion
TCGA-4Z-AA7M		Yes	Shallow Deletion
TCGA-4Z-AA7Q		Yes	Shallow Deletion
TCGA-4Z-AA7W		Yes	Shallow Deletion
TCGA-4Z-AA81		Yes	Shallow Deletion
TCGA-4Z-AA84		Yes	Shallow Deletion
TCGA-4Z-AA86		Yes	Shallow Deletion
TCGA-4Z-AA87		Yes	Shallow Deletion
TCGA-BL-A0C8	Yes	Yes	Shallow Deletion
TCGA-BL-A13J	Yes	Yes	Shallow Deletion
TCGA-BT-A2LA	Yes	Yes	Shallow Deletion
TCGA-BT-A2LB	Yes	Yes	Shallow Deletion
TCGA-BT-A3PH	Yes	Yes	Shallow Deletion
TCGA-BT-A20N	Yes	Yes	Shallow Deletion
TCGA-BT-A20R	Yes	Yes	Shallow Deletion
TCGA-BT-A20W	Yes	Yes	Shallow Deletion
TCGA-BT-A42C	Yes	Yes	Shallow Deletion
TCGA-BT-A42E	Yes	Yes	Shallow Deletion
TCGA-CF-A1HS	Yes	Yes	Shallow Deletion
TCGA-CF-A8HX		Yes	Shallow Deletion
TCGA-CF-A9FF		Yes	Shallow Deletion
TCGA-CF-A47T	Yes	Yes	Shallow Deletion
TCGA-CU-A0YN	Yes	Yes	Shallow Deletion
TCGA-CU-A3KJ	Yes	Yes	Shallow Deletion
TCGA-CU-A3QU	Yes	Yes	Shallow Deletion
TCGA-CU-A5W6	Yes	Yes	Shallow Deletion
TCGA-DK-A1AC	Yes	Yes	Shallow Deletion
TCGA-DK-A2HX	Yes	Yes	Shallow Deletion
TCGA-DK-A2I4	Yes	Yes	Shallow Deletion
TCGA-DK-A3IK	Yes	Yes	Shallow Deletion
TCGA-DK-A3IM	Yes	Yes	Shallow Deletion
TCGA-DK-A3IN	Yes	Yes	Shallow Deletion
TCGA-DK-A3IT	Yes	Yes	Shallow Deletion
TCGA-DK-A3IV	Yes	Yes	Shallow Deletion
TCGA-DK-A3WX	Yes	Yes	Shallow Deletion
TCGA-DK-A3X2	Yes	Yes	Shallow Deletion
TCGA-DK-A6B1	Yes	Yes	Shallow Deletion
TCGA-DK-A6B6	Yes	Yes	Shallow Deletion
TCGA-DK-AA6M		Yes	Shallow Deletion
TCGA-DK-AA6P		Yes	Shallow Deletion
TCGA-DK-AA6Q		Yes	Shallow Deletion
TCGA-DK-AA6R		Yes	Shallow Deletion
TCGA-DK-AA6S		Yes	Shallow Deletion
TCGA-DK-AA75		Yes	Shallow Deletion
TCGA-E5-A4U1	Yes	Yes	Shallow Deletion
TCGA-E7-A5KE	Yes	Yes	Shallow Deletion
TCGA-E7-A6ME	Yes	Yes	Shallow Deletion
TCGA-E7-A541	Yes	Yes	Shallow Deletion
TCGA-FD-A3B3	Yes	Yes	Shallow Deletion
TCGA-FD-A3B6	Yes	Yes	Shallow Deletion
TCGA-FD-A3SR	Yes	Yes	Shallow Deletion
TCGA-FD-A5BV	Yes	Yes	Shallow Deletion
TCGA-FD-A5BZ	Yes	Yes	Shallow Deletion
TCGA-FD-A6TD	Yes	Yes	Shallow Deletion
TCGA-FD-A6TE	Yes	Yes	Shallow Deletion
TCGA-FD-A6TF	Yes	Yes	Shallow Deletion
TCGA-FD-A6TH	Yes	Yes	Shallow Deletion
TCGA-FD-A6TK	Yes	Yes	Shallow Deletion
TCGA-FD-A43N	Yes	Yes	Shallow Deletion
TCGA-FD-A43U	Yes	Yes	Shallow Deletion
TCGA-FD-A43Y		Yes	Shallow Deletion
TCGA-FD-A62N	Yes	Yes	Shallow Deletion
TCGA-FD-A62O	Yes	Yes	Shallow Deletion
TCGA-FD-A62S	Yes	Yes	Shallow Deletion
TCGA-FJ-A3Z7	Yes	Yes	Shallow Deletion
TCGA-G2-A2EL	Yes	Yes	Shallow Deletion
TCGA-G2-A3IE	Yes	Yes	Shallow Deletion
TCGA-GC-A3YS	Yes	Yes	Shallow Deletion
TCGA-GD-A2C5	Yes	Yes	Shallow Deletion
TCGA-GD-A3OP	Yes	Yes	Shallow Deletion
TCGA-GD-A6C6	Yes	Yes	Shallow Deletion
TCGA-GU-A42R	Yes	Yes	Shallow Deletion
TCGA-GU-AATO		Yes	Shallow Deletion
TCGA-GU-AATP		Yes	Shallow Deletion
TCGA-GU-A762	Yes	Yes	Shallow Deletion
TCGA-GU-A766	Yes	Yes	Shallow Deletion
TCGA-GV-A3JW	Yes	Yes	Shallow Deletion
TCGA-GV-A3JZ	Yes	Yes	Shallow Deletion
TCGA-GV-A3QH	Yes	Yes	Shallow Deletion
TCGA-GV-A6ZA	Yes	Yes	Shallow Deletion
TCGA-H4-A2HQ	Yes	Yes	Shallow Deletion
TCGA-HQ-A2OE	Yes	Yes	Shallow Deletion
TCGA-HQ-A2OF	Yes	Yes	Shallow Deletion
TCGA-K4-A3WS	Yes	Yes	Shallow Deletion
TCGA-K4-A4AC	Yes	Yes	Shallow Deletion
TCGA-K4-A5RH	Yes	Yes	Shallow Deletion
TCGA-K4-A5RI	Yes	Yes	Shallow Deletion
TCGA-K4-A5RJ	Yes	Yes	Shallow Deletion
TCGA-K4-A6FZ	Yes	Yes	Shallow Deletion
TCGA-K4-A54R	Yes	Yes	Shallow Deletion
TCGA-K4-AAQO		Yes	Shallow Deletion
TCGA-KQ-A41O		Yes	Shallow Deletion
TCGA-KQ-A41S	Yes	Yes	Shallow Deletion
TCGA-LC-A66R	Yes	Yes	Shallow Deletion
TCGA-LT-A5Z6	Yes	Yes	Shallow Deletion
TCGA-MV-A51V	Yes	Yes	Shallow Deletion
TCGA-S5-A6DX	Yes	Yes	Shallow Deletion
TCGA-UY-A8OB		Yes	Shallow Deletion
TCGA-UY-A8OD		Yes	Shallow Deletion
TCGA-UY-A9PD		Yes	Shallow Deletion
TCGA-UY-A78M		Yes	Shallow Deletion
TCGA-UY-A78N	Yes	Yes	Shallow Deletion
TCGA-XF-A8HC		Yes	Shallow Deletion
TCGA-XF-A8HF		Yes	Shallow Deletion
TCGA-XF-A8HG		Yes	Shallow Deletion
TCGA-XF-A9SI		Yes	Shallow Deletion
TCGA-XF-A9SM		Yes	Shallow Deletion
TCGA-XF-A9SP		Yes	Shallow Deletion
TCGA-XF-A9ST		Yes	Shallow Deletion
TCGA-XF-A9SW		Yes	Shallow Deletion
TCGA-XF-A9SY		Yes	Shallow Deletion
TCGA-XF-A9SZ		Yes	Shallow Deletion
TCGA-XF-A9T0		Yes	Shallow Deletion
TCGA-XF-A9T3		Yes	Shallow Deletion
TCGA-XF-A9T6		Yes	Shallow Deletion
TCGA-XF-AAML		Yes	Shallow Deletion
TCGA-XF-AAMT		Yes	Shallow Deletion
TCGA-XF-AAMW		Yes	Shallow Deletion
TCGA-XF-AAMX		Yes	Shallow Deletion
TCGA-XF-AAMZ		Yes	Shallow Deletion
TCGA-XF-AAN0		Yes	Shallow Deletion
TCGA-XF-AAN2		Yes	Shallow Deletion
TCGA-XF-AAN3		Yes	Shallow Deletion
TCGA-XF-AAN7		Yes	Shallow Deletion
TCGA-YF-AA3M		Yes	Shallow Deletion
TCGA-ZF-A9R2		Yes	Shallow Deletion
TCGA-ZF-A9RM		Yes	Shallow Deletion
TCGA-ZF-A9RN		Yes	Shallow Deletion
TCGA-ZF-AA4N		Yes	Shallow Deletion
TCGA-ZF-AA4T		Yes	Shallow Deletion
TCGA-ZF-AA4V		Yes	Shallow Deletion
TCGA-ZF-AA51		Yes	Shallow Deletion
TCGA-ZF-AA53		Yes	Shallow Deletion
TCGA-ZF-AA54		Yes	Shallow Deletion
TCGA-ZF-AA58		Yes	Shallow Deletion
TCGA-BT-A20O	Yes	Yes	WT
TCGA-BT-A20T	Yes	Yes	WT
TCGA-DK-A1AD	Yes	Yes	WT
TCGA-C4-A0F0	Yes	Yes	WT
TCGA-CU-A3YL	Yes	Yes	WT
TCGA-FD-A3SL	Yes	Yes	WT
TCGA-C4-A0F1	Yes		WT
TCGA-DK-A2I1	Yes	Yes	WT
TCGA-FD-A3N5	Yes	Yes	WT
TCGA-FD-A3SM	Yes	Yes	WT
TCGA-GV-A3QG	Yes	Yes	WT
TCGA-BL-A3JM	Yes	Yes	WT
TCGA-BL-A13I	Yes	Yes	WT
TCGA-BT-A0YX	Yes	Yes	WT
TCGA-BT-A2LD	Yes	Yes	WT
TCGA-BT-A3PK	Yes	Yes	WT
TCGA-BT-A20J	Yes	Yes	WT
TCGA-BT-A20P	Yes	Yes	WT
TCGA-BT-A20Q	Yes	Yes	WT
TCGA-BT-A20U	Yes	Yes	WT
TCGA-BT-A20V	Yes	Yes	WT
TCGA-BT-A20X	Yes	Yes	WT
TCGA-BT-A42B	Yes	Yes	WT
TCGA-C4-A0EZ	Yes	Yes	WT
TCGA-CF-A1HR	Yes	Yes	WT
TCGA-CF-A3MF	Yes	Yes	WT
TCGA-CF-A3MG	Yes	Yes	WT
TCGA-CF-A3MH	Yes	Yes	WT
TCGA-CF-A3MI	Yes	Yes	WT
TCGA-CF-A5U8	Yes	Yes	WT
TCGA-CF-A5UA	Yes	Yes	WT
TCGA-CF-A27C	Yes	Yes	WT
TCGA-CF-A47S	Yes	Yes	WT
TCGA-CF-A47V	Yes	Yes	WT
TCGA-CF-A47W	Yes	Yes	WT
TCGA-CF-A47Y	Yes	Yes	WT
TCGA-CU-A72E	Yes	Yes	WT
TCGA-DK-A1A5	Yes	Yes	WT
TCGA-DK-A1A6	Yes	Yes	WT
TCGA-DK-A1AA	Yes	Yes	WT
TCGA-DK-A1AB	Yes	Yes	WT
TCGA-DK-A1AE	Yes	Yes	WT
TCGA-DK-A1AF	Yes	Yes	WT
TCGA-DK-A1AG	Yes	Yes	WT
TCGA-DK-A2I2	Yes	Yes	WT
TCGA-DK-A3IL	Yes	Yes	WT
TCGA-DK-A3IQ	Yes	Yes	WT
TCGA-DK-A3IU	Yes	Yes	WT
TCGA-DK-A3WW	Yes	Yes	WT
TCGA-DK-A3WY	Yes	Yes	WT
TCGA-DK-A3X1	Yes	Yes	WT
TCGA-DK-A6AW	Yes	Yes	WT
TCGA-DK-A6B0	Yes	Yes	WT
TCGA-DK-A6B2	Yes	Yes	WT
TCGA-DK-A6B5	Yes	Yes	WT
TCGA-E5-A2PC	Yes	Yes	WT
TCGA-E7-A3X6	Yes	Yes	WT
TCGA-E7-A3Y1	Yes	Yes	WT
TCGA-E7-A4XJ	Yes	Yes	WT
TCGA-E7-A5KF	Yes	Yes	WT
TCGA-E7-A6MF	Yes	Yes	WT
TCGA-E7-A7DU	Yes	Yes	WT
TCGA-E7-A7DV	Yes	Yes	WT
TCGA-E7-A677	Yes	Yes	WT
TCGA-E7-A678	Yes	Yes	WT
TCGA-FD-A3B4	Yes	Yes	WT
TCGA-FD-A3B5	Yes	Yes	WT
TCGA-FD-A3B7	Yes	Yes	WT
TCGA-FD-A3B8	Yes	Yes	WT
TCGA-FD-A3N6	Yes	Yes	WT
TCGA-FD-A3NA	Yes	Yes	WT
TCGA-FD-A3SJ	Yes	Yes	WT
TCGA-FD-A3SN	Yes	Yes	WT
TCGA-FD-A3SO	Yes	Yes	WT
TCGA-FD-A3SQ	Yes	Yes	WT
TCGA-FD-A3SS	Yes	Yes	WT
TCGA-FD-A5BS	Yes	Yes	WT
TCGA-FD-A5BX	Yes	Yes	WT
TCGA-FD-A5C0	Yes	Yes	WT
TCGA-FD-A5C1	Yes	Yes	WT
TCGA-FD-A6TA	Yes	Yes	WT
TCGA-FD-A6TB	Yes	Yes	WT
TCGA-FD-A6TG	Yes	Yes	WT
TCGA-FD-A6TI	Yes	Yes	WT
TCGA-FD-A43S	Yes	Yes	WT
TCGA-FD-A43X	Yes	Yes	WT
TCGA-FJ-A3Z9	Yes	Yes	WT
TCGA-FJ-A3ZE	Yes	Yes	WT
TCGA-FJ-A3ZF	Yes	Yes	WT
TCGA-FT-A61P	Yes	Yes	WT
TCGA-G2-A2EJ	Yes	Yes	WT
TCGA-G2-A2EK	Yes	Yes	WT
TCGA-G2-A2EO	Yes	Yes	WT
TCGA-G2-A2ES	Yes	Yes	WT
TCGA-G2-A3IB	Yes	Yes	WT
TCGA-G2-A3VY	Yes	Yes	WT
TCGA-GC-A3BM	Yes	Yes	WT
TCGA-GC-A3I6	Yes	Yes	WT
TCGA-GC-A3WC	Yes	Yes	WT
TCGA-GD-A3OQ	Yes	Yes	WT
TCGA-GD-A3OS	Yes	Yes	WT
TCGA-GD-A76B	Yes	Yes	WT
TCGA-GU-A763	Yes	Yes	WT
TCGA-GV-A3JV	Yes	Yes	WT
TCGA-GV-A3QF	Yes	Yes	WT
TCGA-GV-A3QK	Yes	Yes	WT
TCGA-GV-A40E	Yes	Yes	WT
TCGA-GV-A40G	Yes	Yes	WT
TCGA-H4-A2HO	Yes	Yes	WT
TCGA-HQ-A5ND	Yes	Yes	WT
TCGA-HQ-A5NE	Yes	Yes	WT
TCGA-K4-A3WU	Yes	Yes	WT
TCGA-K4-A3WV	Yes	Yes	WT
TCGA-K4-A4AB	Yes	Yes	WT
TCGA-K4-A6MB	Yes	Yes	WT
TCGA-KQ-A41N	Yes	Yes	WT
TCGA-KQ-A41Q	Yes	Yes	WT
TCGA-PQ-A6FI	Yes	Yes	WT
TCGA-R3-A69X	Yes	Yes	WT
TCGA-UY-A78K	Yes	Yes	WT
TCGA-UY-A78L	Yes	Yes	WT
TCGA-UY-A78O	Yes	Yes	WT

## Sheet: BLCA RPPA enrichment
Gene	Cytoband	Mean in altered group	Mean in unaltered group	SD in altered group	SD in unaltered group	Log Ratio	p-Value	q-Value	Tendency
PDK1_PS241	2q31.1	-0.1	0.08	0.29	0.29	-0.18	1.596e-06	0.0003303	Under-expressed
PCNA	20p12.3	0.02	-0.17	0.31	0.32	0.19	3.732e-06	0.0003862	Over-expressed
PDK1	2q31.1	-0.02	0.08	0.19	0.18	-0.1	1.282e-05	0.0008847	Under-expressed
CCNB1	5q13.2	0.15	-0.25	0.7	0.82	0.4	4.101e-05	0.002122	Over-expressed
TSC2_PT1462	16p13.3	-0.04	0.07	0.22	0.26	-0.11	0.0001837	0.007604	Under-expressed
MSH6	2p16.3	0.02	-0.24	0.61	0.58	0.26	0.0006026	0.0188	Over-expressed
PTEN	10q23.31	-0.13	0.1	0.54	0.55	-0.23	0.000718	0.0188	Under-expressed
BCL2L11	2q13	0.1	-0.1	0.41	0.48	0.19	0.0007269	0.0188	Over-expressed
FOXM1	12p13.33	0.09	-0.07	0.34	0.41	0.16	0.001067	0.0206	Over-expressed
ERRFI1	1p36.23	0.03	-0.04	0.2	0.17	0.07	0.001168	0.0206	Over-expressed
CDKN1B	12p13.1	0.05	-0.05	0.3	0.23	0.11	0.001174	0.0206	Over-expressed
GAB2	11q14.1	0.1	-0.07	0.43	0.43	0.18	0.001267	0.0206	Over-expressed
PEA15	1q23.2	0.06	-0.07	0.31	0.36	0.14	0.001365	0.0206	Over-expressed
XRCC1	19q13.31	-0.03	-0.14	0.29	0.29	0.12	0.001415	0.0206	Over-expressed
PRKCB_PS660	16p11.2	-0.08	0.12	0.45	0.53	-0.2	0.001495	0.0206	Under-expressed
STMN1	1p36.11	0.13	0.02	0.28	0.28	0.11	0.00203	0.0263	Over-expressed
PDCD4	10q25.2	-0.03	0.23	0.62	0.71	-0.26	0.002237	0.0265	Under-expressed
BAD_PS112	11q13.1	-0.05	0.06	0.28	0.33	-0.12	0.002302	0.0265	Under-expressed
KIT	4q12	0.05	0.24	0.44	0.58	-0.19	0.004171	0.0454	Under-expressed
CCNE1	19q12	0.13	-0.08	0.56	0.59	0.2	0.004913	0.0508	Over-expressed
NDRG1_PT346	8q24.3	0.05	0.38	0.92	0.98	-0.33	0.006139	0.0605	Under-expressed
RAF1	3p25.2	0.08	-0.02	0.32	0.25	0.09	0.007751	0.0716	Over-expressed
MAPK14_PT180_Y182	6p21.3-p21.2	-0.13	0.1	0.67	0.69	-0.23	0.00795	0.0716	Under-expressed
MAP2K1	15q22.31	0.06	-0.06	0.37	0.34	0.12	0.008687	0.0749	Over-expressed
IRS1	2q36.3	0.04	0.14	0.28	0.38	-0.11	0.0123	0.102	Under-expressed
IGFBP2	2q35	0.06	0.25	0.52	0.72	-0.19	0.0159	0.123	Under-expressed
PRKCD_PS664	3p21.31	-0.01	0.07	0.21	0.29	-0.08	0.0162	0.123	Under-expressed
BAX	19q13.33	0.05	-0.03	0.27	0.32	0.09	0.0168	0.123	Over-expressed
CDKN1A	6p21.2	-0.08	0.1	0.69	0.56	-0.18	0.0176	0.123	Under-expressed
CHEK1_PS345	11q24.2	-0.04	0.05	0.23	0.33	-0.09	0.018	0.123	Under-expressed
FN1	2q35	0.04	-0.21	0.83	0.91	0.26	0.0185	0.123	Over-expressed
CASP8	2q33.1	-0.04	0.03	0.24	0.25	-0.07	0.0233	0.143	Under-expressed
VHL	3p25.3	-0.42	-0.02	1.34	1.42	-0.39	0.0233	0.143	Under-expressed
CDKN1B_PT157	12p13.1-p12	0.01	0.05	0.13	0.12	-0.04	0.0235	0.143	Under-expressed
YBX1	1p34.2	0.07	-0.01	0.27	0.32	0.08	0.0265	0.149	Over-expressed
SMAD3	15q22.33	0	0.07	0.22	0.31	-0.08	0.028	0.149	Under-expressed
MAPK1	22q11.22	-0.01	-0.09	0.25	0.28	0.07	0.029	0.149	Over-expressed
MSH2	2p21-p16.3	-0.03	-0.14	0.4	0.37	0.1	0.029	0.149	Over-expressed
RAD51	15q15.1	0.02	-0.07	0.37	0.33	0.09	0.0303	0.149	Over-expressed
RPS6_PS235_S236	9p21	0	0.16	0.63	0.54	-0.16	0.0308	0.149	Under-expressed
SRC_PY527	20q12-q13	0.01	0.23	0.77	0.84	-0.22	0.0314	0.149	Under-expressed
AKT1_2_3_PS473	14q32.32	-0.04	0.12	0.54	0.62	-0.16	0.0316	0.149	Under-expressed
GAPDH	12p13.31	-0.08	0.14	0.61	0.9	-0.21	0.033	0.152	Under-expressed
CASP7	10q25.3	0.35	0.1	0.95	0.94	0.24	0.0379	0.171	Over-expressed
NOTCH1	9q34.3	0.04	0.11	0.26	0.27	-0.07	0.0398	0.175	Under-expressed
ERBB3_PY1289	12q13	0.07	0.11	0.19	0.18	-0.05	0.0457	0.197	Under-expressed
RPS6KA1_PT359_S363	1p	0.05	0.12	0.24	0.26	-0.06	0.0473	0.2	Under-expressed
TFRC	3q29	0.02	-0.18	0.7	0.91	0.2	0.051	0.211	Over-expressed
XRCC5	2q35	-0.16	-0.03	0.52	0.54	-0.13	0.0523	0.212	Under-expressed
G6PD	Xq28	0.1	0.28	0.63	0.84	-0.18	0.0541	0.213	Under-expressed
CDH1	16q22.1	-0.47	-0.16	1.32	1.32	-0.32	0.0547	0.213	Under-expressed
CHEK1	11q24.2	0.11	0.01	0.4	0.42	0.1	0.0557	0.213	Over-expressed
GSK3A_PS9	19q13.2	-0.12	0	0.5	0.55	-0.12	0.0631	0.233	Under-expressed
GSK3B_PS9	3q13.3	-0.12	0	0.5	0.55	-0.12	0.0631	0.233	Under-expressed
RPS6KA1	1p36.11	-0.04	0.04	0.32	0.37	-0.08	0.064	0.233	Under-expressed
MAPK8_PT183	10q11.22	0.03	0.1	0.29	0.32	-0.07	0.0666	0.238	Under-expressed
GSK3A	19q13.2	0	-0.06	0.25	0.25	0.06	0.0707	0.244	Over-expressed
GSK3B	3q13.33	0	-0.06	0.25	0.25	0.06	0.0707	0.244	Over-expressed
AKT1S1_PT246	19q13.33	0	0.04	0.2	0.24	-0.05	0.0872	0.296	Under-expressed
AKT1_PT308	14q32.32	0	0.1	0.46	0.46	-0.1	0.0916	0.296	Under-expressed
AKT2_PT308	19q13.1-q13.2	0	0.1	0.46	0.46	-0.1	0.0916	0.296	Under-expressed
AKT3_PT308	1q44	0	0.1	0.46	0.46	-0.1	0.0916	0.296	Under-expressed
SRC_PY416	20q12-q13	-0.03	0.07	0.55	0.5	-0.11	0.101	0.323	Under-expressed
SERPINE1	7q22.1	0.1	-0.11	1.09	1	0.21	0.105	0.329	Over-expressed
RB1_PS807_S811	13q14.2	-0.02	0.12	0.7	0.71	-0.14	0.112	0.347	Under-expressed
EEF2K	16p12.2	-0.05	0.06	0.5	0.62	-0.11	0.116	0.354	Under-expressed
NRAS	1p13.2	0.05	0.01	0.17	0.21	0.04	0.123	0.369	Over-expressed
CTNNB1	3p22.1	-0.26	-0.09	0.81	0.94	-0.17	0.13	0.385	Under-expressed
RPS6_PS240_S244	9p21	0.01	0.11	0.59	0.5	-0.1	0.144	0.421	Under-expressed
AR	Xq12	0.03	0.11	0.44	0.48	-0.08	0.171	0.49	Under-expressed
EIF4EBP1	8p11.23	-0.02	-0.09	0.42	0.46	0.07	0.173	0.49	Over-expressed
SRC	20q11.23	0	0.1	0.5	0.63	-0.1	0.177	0.494	Under-expressed
TUBA1B	12q13.12	0.04	-0.08	0.74	0.73	0.12	0.187	0.515	Over-expressed
CDK1	10q21.2	0.03	-0.01	0.25	0.26	0.04	0.2	0.543	Over-expressed
CAV1	7q31.2	0.23	0.07	1.01	1.06	0.16	0.203	0.543	Over-expressed
EIF4EBP1_PT37_T46	8p12	-0.04	0.07	0.67	0.77	-0.11	0.205	0.543	Under-expressed
ESR1_PS118	6q25.1	-0.04	0	0.18	0.21	-0.03	0.207	0.543	Under-expressed
TP53BP1	15q15.3	-0.11	-0.02	0.54	0.55	-0.08	0.215	0.543	Under-expressed
SMAD4	18q21.2	0.02	-0.01	0.22	0.19	0.03	0.216	0.543	Over-expressed
NF2	22q12.2	-0.04	0.01	0.31	0.33	-0.05	0.217	0.543	Under-expressed
ASNS	7q21.3	0.1	0	0.55	0.67	0.1	0.218	0.543	Over-expressed
CDKN1B_PT198	12p13.1-p12	0.03	0.01	0.17	0.21	0.03	0.236	0.576	Over-expressed
NFKB1_PS536	4q24	0.03	0.11	0.52	0.6	-0.08	0.236	0.576	Under-expressed
YAP1_PS127	11q13	0.03	0.13	0.66	0.67	-0.1	0.24	0.578	Under-expressed
SMAD1	4q31.21	0.05	0.01	0.28	0.25	0.04	0.252	0.599	Over-expressed
MYC	8q24.21	0.04	0.1	0.35	0.45	-0.06	0.256	0.601	Under-expressed
DIRAS3	1p31.3	0.08	0.11	0.22	0.23	-0.03	0.262	0.606	Under-expressed
ESR1	6q25.1-q25.2	0.05	0.1	0.31	0.36	-0.05	0.263	0.606	Under-expressed
TSC2	16p13.3	-0.11	-0.03	0.54	0.52	-0.07	0.269	0.607	Under-expressed
PXN	12q24.23	-0.07	0.01	0.69	0.55	-0.08	0.27	0.607	Under-expressed
ERBB2	17q12	-0.01	0.13	0.96	1.09	-0.14	0.273	0.607	Under-expressed
MAPK14	6p21.31	0	0.04	0.33	0.27	-0.04	0.279	0.615	Under-expressed
YAP1	11q22.1	0.05	0.01	0.34	0.33	0.04	0.287	0.624	Over-expressed
TP53	17p13.1	0.04	-0.02	0.43	0.45	0.06	0.289	0.624	Over-expressed
RB1	13q14.2	0.04	0.07	0.22	0.19	-0.03	0.293	0.625	Under-expressed
RAF1_PS338	3p25	0.09	0.06	0.22	0.2	0.03	0.309	0.652	Over-expressed
PRKAA1_PT172	5p12	0.03	-0.05	0.6	0.61	0.08	0.312	0.653	Over-expressed
TIGAR	12p13.32	0.01	0.04	0.18	0.31	-0.03	0.317	0.655	Under-expressed
EIF4EBP1_PS65	8p12	0.01	-0.03	0.28	0.3	0.04	0.328	0.665	Over-expressed
SYK	9q22.2	-0.03	0.04	0.6	0.61	-0.07	0.336	0.665	Under-expressed
GSK3A_PS21_S9	19q13.2	-0.07	0	0.52	0.6	-0.07	0.336	0.665	Under-expressed
GSK3B_PS21_S9	3q13.3	-0.07	0	0.52	0.6	-0.07	0.336	0.665	Under-expressed
CDH2	18q12.1	0.08	0.11	0.27	0.31	-0.03	0.337	0.665	Under-expressed
EGFR_PY1173	7p12	0.06	0.05	0.19	0.12	0.02	0.342	0.666	Over-expressed
MTOR_PS2448	1p36.2	-0.04	-0.01	0.25	0.25	-0.03	0.346	0.666	Under-expressed
RAD50	5q31.1	-0.07	-0.1	0.25	0.31	0.03	0.348	0.666	Over-expressed
ETS1	11q24.3	0	0.04	0.3	0.38	-0.04	0.352	0.668	Under-expressed
ERBB3	12q13.2	0.04	0.1	0.54	0.64	-0.07	0.37	0.697	Under-expressed
PARK7	1p36.23	0.05	0.08	0.23	0.26	-0.03	0.378	0.704	Under-expressed
PRKCA_PS657	17q22-q23.2	-0.03	0.02	0.51	0.55	-0.06	0.388	0.717	Under-expressed
CDH3	16q22.1	0.04	0.01	0.38	0.28	0.03	0.404	0.735	Over-expressed
KDR	4q12	-0.06	0	0.55	0.59	-0.06	0.405	0.735	Under-expressed
CCND1	11q13.3	0.07	0.1	0.36	0.26	-0.03	0.412	0.742	Under-expressed
BCL2L1	20q11.21	0.08	0.05	0.28	0.34	0.03	0.421	0.742	Over-expressed
DIABLO	12q24.31	-0.03	0.01	0.4	0.46	-0.04	0.423	0.742	Under-expressed
LCK	1p35.2	0.11	0.07	0.38	0.43	0.04	0.425	0.742	Over-expressed
PGR	11q22.1	0.05	0.07	0.2	0.22	-0.02	0.43	0.742	Under-expressed
INPP4B	4q31.21	0.07	0.14	0.74	0.85	-0.08	0.43	0.742	Under-expressed
YBX1_PS102	1p34	0.07	0.04	0.29	0.21	0.02	0.449	0.769	Over-expressed
ANXA7	10q22.2	0.03	0.06	0.25	0.23	-0.02	0.463	0.786	Under-expressed
EIF4EBP1_PT70	8p12	0.04	0.02	0.23	0.22	0.02	0.474	0.788	Over-expressed
BAP1	3p21.1	-0.09	-0.13	0.43	0.4	0.04	0.476	0.788	Over-expressed
WWTR1	3q25.1	0.1	0.08	0.25	0.29	0.02	0.477	0.788	Over-expressed
CHEK2_PT68	22q12.1	0.05	0.03	0.25	0.21	0.02	0.479	0.788	Over-expressed
XBP1	22q12.1|22q12	0.01	0.03	0.33	0.27	-0.03	0.488	0.79	Under-expressed
EIF4E	4q23	-0.04	-0.01	0.23	0.24	-0.02	0.491	0.79	Under-expressed
ACACA	17q12	-0.04	-0.09	0.62	0.62	0.05	0.492	0.79	Over-expressed
BAK1	6p21.31	-0.01	-0.03	0.27	0.29	0.02	0.506	0.799	Over-expressed
PRKAA1	5p13.1	-0.01	0.02	0.27	0.26	-0.02	0.511	0.799	Under-expressed
EEF2	19p13.3	-0.02	-0.05	0.39	0.44	0.03	0.511	0.799	Over-expressed
RPS6KB1	17q23.1	-0.04	-0.08	0.47	0.42	0.04	0.52	0.799	Over-expressed
PIK3R1	5q13.1	0.04	0.02	0.28	0.3	0.02	0.521	0.799	Over-expressed
PIK3R2	19p13.11	0.04	0.02	0.28	0.3	0.02	0.521	0.799	Over-expressed
SCD	10q24.31	0.01	0.04	0.29	0.27	-0.02	0.529	0.805	Under-expressed
TGM2	20q11.23	0.14	0.09	0.62	0.63	0.05	0.541	0.812	Over-expressed
EIF4G1	3q27.1	-0.03	-0.07	0.63	0.48	0.04	0.549	0.812	Over-expressed
MYH9_PS1943	22q13.1	-0.04	-0.07	0.48	0.33	0.03	0.554	0.812	Over-expressed
PEA15_PS116	1q21.1	0.05	0.08	0.34	0.31	-0.02	0.555	0.812	Under-expressed
PRKCA	17q24.2	-0.03	0.01	0.52	0.54	-0.04	0.564	0.812	Under-expressed
TSC1	9q34.13	-0.02	-0.04	0.37	0.33	0.02	0.565	0.812	Over-expressed
GATA3	10p14	0.16	0.1	0.89	0.89	0.06	0.567	0.812	Over-expressed
MS4A1	11q12.2	-0.03	-0.02	0.14	0.16	-0.01	0.571	0.812	Under-expressed
CHEK2	22q12.1	-0.04	-0.01	0.38	0.38	-0.03	0.572	0.812	Under-expressed
NRG1	8p12	0.05	0.08	0.31	0.31	-0.02	0.576	0.812	Under-expressed
RICTOR_PT1135	5p13.1	0.06	0.04	0.22	0.22	0.02	0.577	0.812	Over-expressed
HSPA1A	6p21.33	0.15	0.2	0.66	0.82	-0.05	0.589	0.823	Under-expressed
RPTOR	17q25.3	0.05	0.04	0.22	0.28	0.02	0.597	0.83	Over-expressed
CCNE2	8q22.1	-0.01	-0.03	0.27	0.34	0.02	0.609	0.84	Over-expressed
RPS6KB1_PT389	17q23.1	0.03	0.01	0.31	0.3	0.02	0.613	0.841	Over-expressed
FOXO3_PS318_S321	6q21	-0.01	0.01	0.23	0.23	-0.01	0.623	0.849	Under-expressed
DVL3	3q27.1	0.03	0.06	0.39	0.37	-0.02	0.634	0.854	Under-expressed
ANXA1	9q21.13	0.11	0.06	0.83	0.86	0.05	0.638	0.854	Over-expressed
SHC1_PY317	1q21	-0.07	-0.05	0.28	0.31	-0.02	0.643	0.854	Under-expressed
BCL2	18q21.33	0.05	0.07	0.26	0.36	-0.02	0.647	0.854	Under-expressed
JUN_PS73	1p32-p31	0.02	0.04	0.25	0.26	-0.01	0.648	0.854	Under-expressed
MYH11	16p13.11	-0.11	-0.04	1.5	1.55	-0.08	0.681	0.871	Under-expressed
BIRC2	11q22.2	-0.01	-0.02	0.22	0.23	0.01	0.684	0.871	Over-expressed
EGFR_PY1068	7p12	0.06	0.1	0.72	0.7	-0.04	0.684	0.871	Under-expressed
PIK3CA	3q26.32	0	-0.01	0.19	0.18	0.01	0.686	0.871	Over-expressed
AKT1	14q32.33	-0.06	-0.04	0.45	0.43	-0.02	0.69	0.871	Under-expressed
AKT2	19q13.2	-0.06	-0.04	0.45	0.43	-0.02	0.69	0.871	Under-expressed
AKT3	1q43-q44	-0.06	-0.04	0.45	0.43	-0.02	0.69	0.871	Under-expressed
ATM	11q22.3	-0.02	-0.05	0.6	0.71	0.03	0.728	0.902	Over-expressed
MRE11	11q21	0.06	0.05	0.21	0.21	0.01	0.729	0.902	Over-expressed
BECN1	17q21.31	0.02	0.03	0.22	0.21	-0.01	0.738	0.902	Under-expressed
FOXO3	6q21	0.03	0.03	0.18	0.2	-0.01	0.741	0.902	Under-expressed
MAPK1_PT202_Y204	22q11.21	0.14	0.11	0.68	0.79	0.03	0.741	0.902	Over-expressed
MAPK3_PT202_Y204	16p11.2	0.14	0.11	0.68	0.79	0.03	0.741	0.902	Over-expressed
RPS6	9p22.1	-0.14	-0.17	0.72	0.6	0.03	0.748	0.906	Over-expressed
RICTOR	5p13.1	0.37	0.32	1.38	1.36	0.05	0.774	0.912	Over-expressed
SETD2	3p21.31	-0.01	-0.02	0.24	0.29	0.01	0.779	0.912	Over-expressed
FASN	17q25.3	-0.14	-0.11	0.91	0.78	-0.03	0.78	0.912	Under-expressed
ACVRL1	12q13.13	0.07	0.06	0.32	0.31	0.01	0.783	0.912	Over-expressed
BRAF	7q34	-0.01	-0.03	0.62	0.64	0.02	0.786	0.912	Over-expressed
MAP2K1_PS217_S221	15q22.1-q22.33	0.06	0.04	0.31	0.37	0.01	0.791	0.912	Over-expressed
SQSTM1	5q35.3	0.04	0.02	0.56	0.57	0.02	0.792	0.912	Over-expressed
RAB11A	15q22.31	0.05	0.06	0.23	0.28	-0.01	0.793	0.912	Under-expressed
RAB11B	19p13.2	0.05	0.06	0.23	0.28	-0.01	0.793	0.912	Under-expressed
SNAI1	20q13.13	0.02	0.03	0.29	0.32	-0.01	0.802	0.917	Under-expressed
STAT5A	17q21.2	-0.04	-0.07	0.74	0.7	0.02	0.815	0.925	Over-expressed
COL6A1	21q22.3	0.11	0.09	0.5	0.56	0.02	0.818	0.925	Over-expressed
EGFR	7p11.2	-0.04	-0.05	0.53	0.5	0.01	0.833	0.925	Over-expressed
ACACA_PS79	17q21	-0.1	-0.08	0.63	0.63	-0.02	0.838	0.925	Under-expressed
ACACB_PS79	12q24.11	-0.1	-0.08	0.63	0.63	-0.02	0.838	0.925	Under-expressed
MTOR	1p36.22	-0.03	-0.02	0.33	0.31	-0.01	0.84	0.925	Under-expressed
SRSF1	17q22	-0.05	-0.04	0.3	0.31	-0.01	0.84	0.925	Under-expressed
ERBB2_PY1248	17q12	0.05	0.06	0.5	0.55	-0.01	0.856	0.934	Under-expressed
BID	22q11.21	0.1	0.1	0.23	0.25	0.01	0.857	0.934	Over-expressed
MET	7q31.2	0.02	0.02	0.25	0.26	-0.01	0.871	0.94	Under-expressed
STAT3_PY705	17q21.31	0.03	0.03	0.42	0.42	0.01	0.876	0.94	Over-expressed
ITGA2	5q11.2	0.02	0.01	0.56	0.52	0.01	0.877	0.94	Over-expressed
MAPK9	5q35.3	0	0	0.3	0.27	0	0.887	0.943	Over-expressed
PREX1	20q13.13	0.06	0.05	0.42	0.48	0.01	0.891	0.943	Over-expressed
PECAM1	17q23.3	0.03	0.04	0.26	0.29	0	0.893	0.943	Under-expressed
STK11	19p13.3	0.1	0.11	0.24	0.23	0	0.907	0.949	Under-expressed
CLDN7	17p13.1	-0.01	0	0.99	1.08	-0.01	0.908	0.949	Under-expressed
MET_PY1235	7q31	0.06	0.06	0.15	0.14	0	0.932	0.969	Under-expressed
ARAF_PS299	Xp11.4-p11.2	0.03	0.02	0.26	0.24	0	0.945	0.971	Over-expressed
YWHAZ	8q22.3	0.02	0.02	0.37	0.41	0	0.948	0.971	Over-expressed
YWHAB	20q13.12	0.03	0.03	0.17	0.22	0	0.949	0.971	Under-expressed
PRDX1	1p34.1	-0.01	-0.01	0.32	0.41	0	0.953	0.971	Under-expressed
YWHAE	17p13.3	0.03	0.03	0.14	0.15	0	0.978	0.991	Over-expressed
RAB25	1q22	-0.1	-0.1	0.7	0.69	0	0.982	0.991	Under-expressed
RBM15	1p13.3	-0.13	-0.13	0.67	0.7	0	0.99	0.991	Over-expressed
ERCC1	19q13.32	0.02	0.02	0.23	0.18	0	0.991	0.991	Over-expressed

## Sheet: UCEC Pheno data
Patient ID	Profiled in Mutations	Profiled in Putative copy-number alterations from GISTIC	CREBBPalterations
TCGA-A5-A0G5	Yes	Yes	Deep Deletion
TCGA-D1-A3JP		Yes	Deep Deletion
TCGA-EY-A3L3		Yes	Deep Deletion
TCGA-EY-A3QX		Yes	Deep Deletion
TCGA-KP-A3VZ		Yes	Deep Deletion
TCGA-PG-A7D5		Yes	Deep Deletion
TCGA-A5-A0GN	Yes	Yes	Shallow Deletion
TCGA-A5-A1OH		Yes	Shallow Deletion
TCGA-A5-A2K4		Yes	Shallow Deletion
TCGA-A5-A3LO		Yes	Shallow Deletion
TCGA-AJ-A2QM		Yes	Shallow Deletion
TCGA-AJ-A3BF		Yes	Shallow Deletion
TCGA-AJ-A3NH		Yes	Shallow Deletion
TCGA-AJ-A3TW		Yes	Shallow Deletion
TCGA-AJ-A23M	Yes	Yes	Shallow Deletion
TCGA-AP-A0LI	Yes	Yes	Shallow Deletion
TCGA-AP-A1DQ	Yes	Yes	Shallow Deletion
TCGA-AP-A05H	Yes	Yes	Shallow Deletion
TCGA-AP-A052	Yes	Yes	Shallow Deletion
TCGA-AW-A1PO		Yes	Shallow Deletion
TCGA-AX-A2H2		Yes	Shallow Deletion
TCGA-AX-A3FV		Yes	Shallow Deletion
TCGA-AX-A3G3		Yes	Shallow Deletion
TCGA-AX-A3GI		Yes	Shallow Deletion
TCGA-AX-A06B	Yes	Yes	Shallow Deletion
TCGA-B5-A0JT	Yes	Yes	Shallow Deletion
TCGA-B5-A0K3	Yes	Yes	Shallow Deletion
TCGA-B5-A0K8	Yes	Yes	Shallow Deletion
TCGA-B5-A0KB		Yes	Shallow Deletion
TCGA-B5-A1MS		Yes	Shallow Deletion
TCGA-B5-A1MY	Yes	Yes	Shallow Deletion
TCGA-B5-A3S1		Yes	Shallow Deletion
TCGA-B5-A5OE		Yes	Shallow Deletion
TCGA-B5-A11I	Yes	Yes	Shallow Deletion
TCGA-B5-A11P		Yes	Shallow Deletion
TCGA-BG-A18C	Yes	Yes	Shallow Deletion
TCGA-BK-A0CC	Yes	Yes	Shallow Deletion
TCGA-BK-A4ZD		Yes	Shallow Deletion
TCGA-BK-A139	Yes	Yes	Shallow Deletion
TCGA-D1-A0ZZ	Yes	Yes	Shallow Deletion
TCGA-D1-A1NU	Yes	Yes	Shallow Deletion
TCGA-D1-A3DG		Yes	Shallow Deletion
TCGA-D1-A3DH		Yes	Shallow Deletion
TCGA-D1-A3JQ		Yes	Shallow Deletion
TCGA-D1-A16I	Yes	Yes	Shallow Deletion
TCGA-D1-A16N	Yes	Yes	Shallow Deletion
TCGA-D1-A16S	Yes	Yes	Shallow Deletion
TCGA-D1-A179		Yes	Shallow Deletion
TCGA-DI-A1NN	Yes	Yes	Shallow Deletion
TCGA-DI-A1NO		Yes	Shallow Deletion
TCGA-DI-A2QY		Yes	Shallow Deletion
TCGA-E6-A8L9		Yes	Shallow Deletion
TCGA-EO-A1Y5	Yes	Yes	Shallow Deletion
TCGA-EO-A1Y7		Yes	Shallow Deletion
TCGA-EO-A1Y8	Yes	Yes	Shallow Deletion
TCGA-EO-A3B1		Yes	Shallow Deletion
TCGA-EY-A1GR		Yes	Shallow Deletion
TCGA-EY-A2OQ		Yes	Shallow Deletion
TCGA-EY-A210		Yes	Shallow Deletion
TCGA-EY-A212	Yes	Yes	Shallow Deletion
TCGA-FI-A2CY		Yes	Shallow Deletion
TCGA-FI-A2EU		Yes	Shallow Deletion
TCGA-FI-A2EX	Yes	Yes	Shallow Deletion
TCGA-FI-A2EY		Yes	Shallow Deletion
TCGA-FI-A3PX		Yes	Shallow Deletion
TCGA-H5-A2HR		Yes	Shallow Deletion
TCGA-KJ-A3U4		Yes	Shallow Deletion
TCGA-KP-A3W4		Yes	Shallow Deletion
TCGA-PG-A5BC		Yes	Shallow Deletion
TCGA-PG-A915		Yes	Shallow Deletion
TCGA-QS-A8F1		Yes	Shallow Deletion
TCGA-SL-A6J9		Yes	Shallow Deletion
TCGA-A5-A0GA	Yes	Yes	WT
TCGA-AP-A0LP	Yes	Yes	WT
TCGA-AP-A054	Yes	Yes	WT
TCGA-AP-A059	Yes	Yes	WT
TCGA-A5-A0G9	Yes	Yes	WT
TCGA-AP-A051	Yes	Yes	WT
TCGA-AP-A056	Yes	Yes	WT
TCGA-AX-A0J0	Yes	Yes	WT
TCGA-B5-A11N	Yes	Yes	WT
TCGA-B5-A11Y	Yes	Yes	WT
TCGA-BG-A0VT	Yes	Yes	WT
TCGA-BG-A18B	Yes	Yes	WT
TCGA-BS-A0TC	Yes	Yes	WT
TCGA-BS-A0UF	Yes	Yes	WT
TCGA-D1-A15X	Yes	Yes	WT
TCGA-D1-A16D	Yes	Yes	WT
TCGA-D1-A17Q	Yes	Yes	WT
TCGA-D1-A103	Yes	Yes	WT
TCGA-D1-A167	Yes	Yes	WT
TCGA-D1-A177	Yes	Yes	WT
TCGA-A5-A0GB	Yes	Yes	WT
TCGA-A5-A0GD	Yes	Yes	WT
TCGA-A5-A0GE	Yes	Yes	WT
TCGA-A5-A0GH	Yes	Yes	WT
TCGA-A5-A0GI	Yes	Yes	WT
TCGA-A5-A0GJ	Yes	Yes	WT
TCGA-A5-A0GM	Yes	Yes	WT
TCGA-A5-A0GQ	Yes	Yes	WT
TCGA-A5-A0GU	Yes	Yes	WT
TCGA-A5-A0GV	Yes	Yes	WT
TCGA-A5-A0GW	Yes	Yes	WT
TCGA-A5-A0GX	Yes	Yes	WT
TCGA-A5-A0R6	Yes	Yes	WT
TCGA-A5-A0R7	Yes	Yes	WT
TCGA-A5-A0R8	Yes	Yes	WT
TCGA-A5-A0R9	Yes	Yes	WT
TCGA-A5-A0RA	Yes	Yes	WT
TCGA-A5-A0VP	Yes	Yes	WT
TCGA-A5-A0VQ	Yes	Yes	WT
TCGA-AP-A0LD	Yes	Yes	WT
TCGA-AP-A0LE	Yes	Yes	WT
TCGA-AP-A0LF	Yes	Yes	WT
TCGA-AP-A0LG	Yes	Yes	WT
TCGA-AP-A0LH	Yes	Yes	WT
TCGA-AP-A0LJ	Yes	Yes	WT
TCGA-AP-A0LL	Yes	Yes	WT
TCGA-AP-A0LM	Yes	Yes	WT
TCGA-AP-A0LN	Yes	Yes	WT
TCGA-AP-A0LT	Yes	Yes	WT
TCGA-AP-A0LV	Yes	Yes	WT
TCGA-AP-A05A	Yes	Yes	WT
TCGA-AP-A05D	Yes	Yes	WT
TCGA-AP-A05J	Yes	Yes	WT
TCGA-AP-A05N	Yes	Yes	WT
TCGA-AP-A05P	Yes	Yes	WT
TCGA-AP-A053	Yes	Yes	WT
TCGA-AX-A0IS	Yes	Yes	WT
TCGA-AX-A0IW	Yes	Yes	WT
TCGA-AX-A0J1	Yes	Yes	WT
TCGA-AX-A2H5	Yes	Yes	WT
TCGA-AX-A2HF	Yes	Yes	WT
TCGA-AX-A05S	Yes	Yes	WT
TCGA-AX-A05T	Yes	Yes	WT
TCGA-AX-A05U	Yes	Yes	WT
TCGA-AX-A05W	Yes	Yes	WT
TCGA-AX-A05Y	Yes	Yes	WT
TCGA-AX-A05Z	Yes	Yes	WT
TCGA-AX-A06L	Yes	Yes	WT
TCGA-AX-A060	Yes	Yes	WT
TCGA-AX-A062	Yes	Yes	WT
TCGA-AX-A063	Yes	Yes	WT
TCGA-AX-A064	Yes	Yes	WT
TCGA-B5-A0JN	Yes	Yes	WT
TCGA-B5-A0JY	Yes	Yes	WT
TCGA-B5-A0JZ	Yes	Yes	WT
TCGA-B5-A0K0	Yes	Yes	WT
TCGA-B5-A0K1	Yes	Yes	WT
TCGA-B5-A0K2	Yes	Yes	WT
TCGA-B5-A0K4	Yes	Yes	WT
TCGA-B5-A0K7	Yes	Yes	WT
TCGA-B5-A0K9	Yes	Yes	WT
TCGA-B5-A1MU	Yes	Yes	WT
TCGA-B5-A11E	Yes	Yes	WT
TCGA-B5-A11F	Yes	Yes	WT
TCGA-B5-A11G	Yes	Yes	WT
TCGA-B5-A11H	Yes	Yes	WT
TCGA-B5-A11Q	Yes	Yes	WT
TCGA-B5-A11S	Yes	Yes	WT
TCGA-B5-A11U	Yes	Yes	WT
TCGA-B5-A11V	Yes	Yes	WT
TCGA-B5-A11W	Yes	Yes	WT
TCGA-B5-A11Z	Yes	Yes	WT
TCGA-B5-A121	Yes	Yes	WT
TCGA-BG-A0LW	Yes	Yes	WT
TCGA-BG-A0LX	Yes	Yes	WT
TCGA-BG-A0M0	Yes	Yes	WT
TCGA-BG-A0M2	Yes	Yes	WT
TCGA-BG-A0M3	Yes	Yes	WT
TCGA-BG-A0M4	Yes	Yes	WT
TCGA-BG-A0M6	Yes	Yes	WT
TCGA-BG-A0M7	Yes	Yes	WT
TCGA-BG-A0M8	Yes	Yes	WT
TCGA-BG-A0M9	Yes	Yes	WT
TCGA-BG-A0MC	Yes	Yes	WT
TCGA-BG-A0MG	Yes	Yes	WT
TCGA-BG-A0MS	Yes	Yes	WT
TCGA-BG-A0MT	Yes	Yes	WT
TCGA-BG-A0MU	Yes	Yes	WT
TCGA-BG-A0RY	Yes	Yes	WT
TCGA-BG-A0VV	Yes	Yes	WT
TCGA-BG-A0W1	Yes	Yes	WT
TCGA-BG-A0YU	Yes	Yes	WT
TCGA-BG-A0YV	Yes	Yes	WT
TCGA-BG-A2AE	Yes	Yes	WT
TCGA-BG-A18A	Yes	Yes	WT
TCGA-BG-A186	Yes	Yes	WT
TCGA-BG-A187	Yes	Yes	WT
TCGA-BK-A0C9	Yes	Yes	WT
TCGA-BK-A0CA	Yes	Yes	WT
TCGA-BK-A0CB	Yes	Yes	WT
TCGA-BK-A13C	Yes	Yes	WT
TCGA-BS-A0T9	Yes	Yes	WT
TCGA-BS-A0TA	Yes	Yes	WT
TCGA-BS-A0TD	Yes	Yes	WT
TCGA-BS-A0TG	Yes	Yes	WT
TCGA-BS-A0TI	Yes	Yes	WT
TCGA-BS-A0TJ	Yes	Yes	WT
TCGA-BS-A0U7	Yes	Yes	WT
TCGA-BS-A0U8	Yes	Yes	WT
TCGA-BS-A0U9	Yes	Yes	WT
TCGA-BS-A0UJ	Yes	Yes	WT
TCGA-BS-A0V7	Yes	Yes	WT
TCGA-D1-A0ZP	Yes	Yes	WT
TCGA-D1-A0ZR	Yes	Yes	WT
TCGA-D1-A0ZU	Yes	Yes	WT
TCGA-D1-A15V	Yes	Yes	WT
TCGA-D1-A15W	Yes	Yes	WT
TCGA-D1-A15Z	Yes	Yes	WT
TCGA-D1-A16B	Yes	Yes	WT
TCGA-D1-A16E	Yes	Yes	WT
TCGA-D1-A16G	Yes	Yes	WT
TCGA-D1-A16J	Yes	Yes	WT
TCGA-D1-A16O	Yes	Yes	WT
TCGA-D1-A16Q	Yes	Yes	WT
TCGA-D1-A16R	Yes	Yes	WT
TCGA-D1-A16X	Yes	Yes	WT
TCGA-D1-A16Y	Yes	Yes	WT
TCGA-D1-A17B	Yes	Yes	WT
TCGA-D1-A17C	Yes	Yes	WT
TCGA-D1-A17D	Yes	Yes	WT
TCGA-D1-A17F	Yes	Yes	WT
TCGA-D1-A17H	Yes	Yes	WT
TCGA-D1-A17K	Yes	Yes	WT
TCGA-D1-A17L	Yes	Yes	WT
TCGA-D1-A17M	Yes	Yes	WT
TCGA-D1-A17N	Yes	Yes	WT
TCGA-D1-A17R	Yes	Yes	WT
TCGA-D1-A17S	Yes	Yes	WT
TCGA-D1-A17T	Yes	Yes	WT
TCGA-D1-A17U	Yes	Yes	WT
TCGA-D1-A101	Yes	Yes	WT
TCGA-D1-A102	Yes	Yes	WT
TCGA-D1-A160	Yes	Yes	WT
TCGA-D1-A161	Yes	Yes	WT
TCGA-D1-A163	Yes	Yes	WT
TCGA-D1-A165	Yes	Yes	WT
TCGA-D1-A168	Yes	Yes	WT
TCGA-D1-A169	Yes	Yes	WT
TCGA-D1-A176	Yes	Yes	WT
TCGA-DI-A0WH	Yes	Yes	WT
TCGA-E6-A1LZ	Yes	Yes	WT
TCGA-EY-A1GS	Yes	Yes	WT
TCGA-FI-A2EW	Yes	Yes	WT

## Sheet: UCEC RPPA enrichment
Gene	Cytoband	Mean in altered group	Mean in unaltered group	SD in altered group	SD in unaltered group	Log Ratio	p-Value	q-Value	Tendency
ASNS	7q21.3	0.4	-0.2	0.67	0.49	0.6	5.5e-12	9.25e-10	Over-expressed
PDK1_PS241	2q31.1	-0.15	0.1	0.29	0.22	-0.26	8.94e-12	9.25e-10	Under-expressed
CCNB1	5q13.2	0.42	-0.37	0.83	0.9	0.79	4.01e-11	2.77e-09	Over-expressed
AKT1_2_3_PT308	14q32.32	-0.54	0.34	1.09	1.02	-0.87	3.24e-09	1.12e-07	Under-expressed
TP53	17p13.1	0.55	-0.06	0.81	0.6	0.61	4.43e-09	1.31e-07	Over-expressed
AKT1_2_3_PS473	14q32.32	-0.53	0.42	1.24	1.14	-0.95	9.59e-09	1.99e-07	Under-expressed
FOXM1	12p13.33	0.27	-0.1	0.5	0.42	0.37	1.4e-08	2.64e-07	Over-expressed
ESR1_PS118	6q25.1	-0.21	0.24	0.57	0.59	-0.45	1.91e-08	3.3e-07	Under-expressed
CHEK2_PT68	22q12.1	0.31	0.06	0.39	0.23	0.26	6.48e-08	1.033e-06	Over-expressed
ESR1	6q25.1-q25.2	-0.71	0.27	1.47	1.14	-0.98	1.65e-07	2.437e-06	Under-expressed
PIK3CA	3q26.32	0.21	-0.02	0.36	0.27	0.23	3.97e-07	5.478e-06	Over-expressed
CDH1	16q22.1	-0.44	0.06	0.77	0.64	-0.5	5.01e-07	6.487e-06	Under-expressed
TUBA1B	12q13.12	-0.4	0.22	0.94	0.82	-0.61	6.14e-07	7.474e-06	Under-expressed
CCNE1	19q12	0.39	-0.08	0.69	0.77	0.47	1.405e-06	1.616e-05	Over-expressed
RAD51	15q15.1	0.06	-0.07	0.2	0.22	0.13	2.493e-06	2.604e-05	Over-expressed
MYH9_PS1943	22q13.1	-0.05	0.15	0.34	0.26	-0.2	2.516e-06	2.604e-05	Under-expressed
PGR	11q22.1	-0.05	0.17	0.31	0.45	-0.22	6.102e-06	6.015e-05	Under-expressed
MAP2K1	15q22.31	0.07	-0.29	0.56	0.68	0.35	1.479e-05	0.0001391	Over-expressed
ITGA2	5q11.2	-0.16	0.08	0.38	0.43	-0.23	1.562e-05	0.0001405	Under-expressed
RPS6KA1	1p36.11	-0.07	0.11	0.33	0.28	-0.18	2.37e-05	0.0002044	Under-expressed
PCNA	20p12.3	0.19	-0.01	0.41	0.32	0.2	9.422e-05	0.0007802	Over-expressed
TSC2_PT1462	16p13.3	-0.08	0.11	0.37	0.39	-0.19	0.0001453	0.001157	Under-expressed
MSH2	2p21-p16.3	0.18	-0.01	0.4	0.35	0.19	0.0001763	0.001351	Over-expressed
BCL2L11	2q13	0.25	0.03	0.44	0.4	0.21	0.0001949	0.001441	Over-expressed
PRKAA1	5p13.1	-0.09	0.07	0.33	0.32	-0.16	0.0002304	0.001644	Under-expressed
BAX	19q13.33	-0.09	0.09	0.33	0.39	-0.17	0.0002566	0.00177	Under-expressed
MSH6	2p16.3	0.2	-0.07	0.63	0.46	0.27	0.0005367	0.003573	Over-expressed
TP53BP1	15q15.3	-0.27	-0.01	0.57	0.59	-0.27	0.0005523	0.003573	Under-expressed
SQSTM1	5q35.3	0.19	-0.04	0.51	0.51	0.23	0.0006924	0.004343	Over-expressed
PDCD4	10q25.2	-0.12	0.25	0.85	0.73	-0.37	0.0007466	0.004545	Under-expressed
PTEN	10q23.31	0.21	-0.1	0.67	0.69	0.3	0.00095	0.005619	Over-expressed
EIF4G1	3q27.1	-0.02	-0.25	0.56	0.51	0.23	0.00123	0.00707	Over-expressed
GAB2	11q14.1	0.15	-0.13	0.71	0.54	0.28	0.001285	0.007186	Over-expressed
CDK1	10q21.2	0.09	-0.02	0.26	0.27	0.11	0.001491	0.008124	Over-expressed
RAF1_PS338	3p25	-0.01	0.04	0.13	0.13	-0.05	0.001947	0.0103	Under-expressed
EIF4EBP1_PT37_T46	8p12	0.1	-0.15	0.63	0.6	0.25	0.002047	0.0106	Over-expressed
CHEK2	22q12.1	0.19	0.01	0.49	0.35	0.18	0.00211	0.0107	Over-expressed
ANXA1	9q21.13	-0.23	0.13	0.86	0.91	-0.36	0.002206	0.0109	Under-expressed
TIGAR	12p13.32	-0.09	0.01	0.26	0.27	-0.1	0.004696	0.0226	Under-expressed
EIF4EBP1	8p11.23	0.06	-0.11	0.46	0.44	0.17	0.005368	0.0253	Over-expressed
RAB25	1q22	-0.11	0.08	0.57	0.48	-0.2	0.005691	0.0258	Under-expressed
EEF2	19p13.3	-0.22	0.01	0.61	0.63	-0.23	0.00573	0.0258	Under-expressed
YAP1_PS127	11q13	-0.2	0.03	0.69	0.48	-0.23	0.006183	0.0272	Under-expressed
PDK1	2q31.1	-0.05	0.02	0.21	0.17	-0.07	0.006457	0.0278	Under-expressed
GATA3	10p14	0	0.11	0.28	0.36	-0.11	0.007964	0.0336	Under-expressed
YBX1	1p34.2	-0.09	0	0.27	0.27	-0.09	0.009955	0.0412	Under-expressed
PRDX1	1p34.1	0.08	-0.04	0.37	0.31	0.12	0.011	0.0448	Over-expressed
STK11	19p13.3	-0.06	0.01	0.18	0.19	-0.06	0.0116	0.0464	Under-expressed
MAPK1	22q11.22	-0.1	0.01	0.36	0.32	-0.11	0.0135	0.051	Under-expressed
EIF4E	4q23	0.03	-0.09	0.33	0.41	0.12	0.0138	0.051	Over-expressed
MAPK14	6p21.31	0.05	-0.04	0.3	0.26	0.09	0.0138	0.051	Over-expressed
GSK3A_PS9	19q13.2	-0.22	0.01	0.71	0.7	-0.23	0.0141	0.051	Under-expressed
GSK3B_PS9	3q13.3	-0.22	0.01	0.71	0.7	-0.23	0.0141	0.051	Under-expressed
PARK7	1p36.23	-0.07	0.03	0.32	0.26	-0.1	0.0143	0.0511	Under-expressed
PREX1	20q13.13	0.16	0	0.51	0.5	0.16	0.0148	0.0515	Over-expressed
CTNNB1	3p22.1	-0.33	-0.07	0.73	0.91	-0.26	0.0149	0.0515	Under-expressed
STAT5A	17q21.2	0.03	-0.18	0.68	0.63	0.21	0.0175	0.0592	Over-expressed
NF2	22q12.2	-0.1	0.02	0.42	0.31	-0.12	0.0177	0.0592	Under-expressed
PIK3R1	5q13.1	-0.07	0.04	0.37	0.33	-0.11	0.0186	0.0603	Under-expressed
PIK3R2	19p13.11	-0.07	0.04	0.37	0.33	-0.11	0.0186	0.0603	Under-expressed
CASP8	2q33.1	0.01	0.14	0.32	0.56	-0.13	0.0222	0.07	Under-expressed
TFRC	3q29	0.07	-0.2	0.94	0.83	0.27	0.0223	0.07	Over-expressed
VHL	3p25.3	0.27	-0.07	1.13	1.12	0.34	0.0231	0.0712	Over-expressed
BAP1	3p21.1	0.02	-0.09	0.36	0.38	0.11	0.0248	0.0754	Over-expressed
MYC	8q24.21	0.14	0.01	0.43	0.42	0.13	0.0265	0.0794	Over-expressed
MAPK14_PT180_Y182	6p21.3-p21.2	-0.27	-0.03	0.83	0.74	-0.23	0.0276	0.0816	Under-expressed
BCL2	18q21.33	0	0.16	0.55	0.55	-0.16	0.0285	0.0831	Under-expressed
HSPA1A	6p21.33	0.12	-0.07	0.69	0.62	0.19	0.0295	0.0848	Over-expressed
CDKN1B_PT157	12p13.1-p12	0.02	0	0.09	0.09	0.03	0.03	0.085	Over-expressed
COL6A1	21q22.3	0.07	0.16	0.35	0.32	-0.1	0.034	0.0951	Under-expressed
RB1	13q14.2	-0.04	0.04	0.19	0.42	-0.08	0.0348	0.0959	Under-expressed
DVL3	3q27.1	0.04	-0.05	0.34	0.28	0.09	0.0363	0.0988	Over-expressed
MYH11	16p13.11	0.17	0.69	1.87	1.94	-0.52	0.0387	0.103	Under-expressed
STMN1	1p36.11	0.06	0	0.25	0.24	0.07	0.0388	0.103	Over-expressed
NRG1	8p12	0.1	0.04	0.22	0.2	0.06	0.0404	0.106	Over-expressed
RPS6KB1_PT389	17q23.1	0.17	0.07	0.4	0.33	0.1	0.0435	0.113	Over-expressed
MTOR	1p36.22	0.02	-0.05	0.3	0.24	0.07	0.0499	0.127	Over-expressed
YWHAZ	8q22.3	0.06	-0.03	0.37	0.34	0.09	0.056	0.141	Over-expressed
RPTOR	17q25.3	0.03	-0.04	0.31	0.25	0.07	0.0662	0.165	Over-expressed
NFKB1_PS536	4q24	0.19	-0.01	0.89	0.77	0.2	0.0689	0.17	Over-expressed
CDKN1B	12p13.1	-0.04	0.04	0.34	0.37	-0.08	0.0756	0.182	Under-expressed
CCNE2	8q22.1	0	-0.07	0.3	0.27	0.07	0.0762	0.182	Over-expressed
STAT3_PY705	17q21.31	-0.03	0.07	0.44	0.42	-0.1	0.0768	0.182	Under-expressed
AR	Xq12	0.08	0.24	0.73	0.56	-0.16	0.0772	0.182	Under-expressed
SMAD1	4q31.21	-0.04	0.02	0.28	0.26	-0.06	0.0806	0.188	Under-expressed
RAB11A	15q22.31	0.01	0.06	0.21	0.22	-0.05	0.0832	0.189	Under-expressed
RAB11B	19p13.2	0.01	0.06	0.21	0.22	-0.05	0.0832	0.189	Under-expressed
SYK	9q22.2	-0.08	0.07	0.73	0.56	-0.15	0.0909	0.204	Under-expressed
EIF4EBP1_PT70	8p12	0.06	0.02	0.2	0.16	0.04	0.0915	0.204	Over-expressed
RPS6	9p22.1	-0.05	0.04	0.42	0.4	-0.09	0.0935	0.206	Under-expressed
KDR	4q12	-0.14	-0.04	0.49	0.46	-0.1	0.1	0.219	Under-expressed
MET	7q31.2	0.05	0.16	0.33	0.7	-0.11	0.109	0.235	Under-expressed
PRKCA_PS657	17q22-q23.2	-0.07	0.06	0.64	0.63	-0.13	0.111	0.237	Under-expressed
RAD50	5q31.1	-0.01	0.07	0.36	0.43	-0.08	0.115	0.243	Under-expressed
EIF4EBP1_PS65	8p12	0.04	-0.03	0.3	0.32	0.06	0.117	0.244	Over-expressed
BCL2L1	20q11.21	0.03	-0.02	0.26	0.28	0.06	0.119	0.244	Over-expressed
NOTCH1	9q34.3	0.04	-0.01	0.26	0.24	0.05	0.12	0.244	Over-expressed
GSK3A_PS21_S9	19q13.2	-0.25	-0.09	0.77	0.77	-0.16	0.123	0.244	Under-expressed
GSK3B_PS21_S9	3q13.3	-0.25	-0.09	0.77	0.77	-0.16	0.123	0.244	Under-expressed
NRAS	1p13.2	0.08	0.05	0.19	0.2	0.04	0.123	0.244	Over-expressed
RPS6_PS240_S244	9p21	0.08	-0.07	0.75	0.69	0.15	0.124	0.244	Over-expressed
XBP1	22q12.1|22q12	-0.01	0.04	0.22	0.22	-0.05	0.127	0.249	Under-expressed
CDKN1B_PT198	12p13.1-p12	-0.03	0	0.19	0.18	-0.04	0.132	0.255	Under-expressed
MS4A1	11q12.2	-0.02	0.02	0.2	0.22	-0.04	0.148	0.279	Under-expressed
RAF1	3p25.2	0	-0.05	0.27	0.2	0.05	0.148	0.279	Over-expressed
PECAM1	17q23.3	0.04	0	0.21	0.25	0.04	0.148	0.279	Over-expressed
ERBB3	12q13.2	0.08	-0.01	0.47	0.44	0.09	0.151	0.282	Over-expressed
MTOR_PS2448	1p36.2	0.03	-0.02	0.25	0.25	0.05	0.156	0.287	Over-expressed
CHEK1_PS345	11q24.2	0	-0.05	0.25	0.22	0.05	0.157	0.287	Over-expressed
INPP4B	4q31.21	0.05	0.15	0.53	0.51	-0.1	0.166	0.301	Under-expressed
XRCC1	19q13.31	0.09	0.04	0.29	0.25	0.05	0.172	0.308	Over-expressed
PRKCA	17q24.2	-0.06	0.06	0.69	0.64	-0.12	0.173	0.308	Under-expressed
TGM2	20q11.23	0.09	0.22	0.79	0.66	-0.13	0.192	0.34	Under-expressed
BAD_PS112	11q13.1	0.04	-0.02	0.37	0.29	0.06	0.202	0.353	Over-expressed
FOXO3_PS318_S321	6q21	0	0.04	0.2	0.22	-0.04	0.203	0.353	Under-expressed
ANXA7	10q22.2	0.04	0.08	0.29	0.21	-0.04	0.207	0.356	Under-expressed
ERBB3_PY1289	12q13	0.03	0.01	0.13	0.15	0.02	0.208	0.356	Over-expressed
CCND1	11q13.3	0	0.04	0.2	0.28	-0.04	0.21	0.356	Under-expressed
EGFR	7p11.2	-0.02	0.02	0.27	0.27	-0.04	0.217	0.365	Under-expressed
ETS1	11q24.3	-0.14	-0.04	0.57	0.6	-0.09	0.218	0.365	Under-expressed
RB1_PS807_S811	13q14.2	0.05	-0.06	0.71	0.66	0.11	0.222	0.368	Over-expressed
RICTOR_PT1135	5p13.1	0.02	0.05	0.18	0.16	-0.03	0.236	0.383	Under-expressed
ERBB2_PY1248	17q12	0.15	0.06	0.64	0.5	0.09	0.237	0.383	Over-expressed
CDKN1A	6p21.2	0.02	-0.03	0.33	0.25	0.05	0.237	0.383	Over-expressed
SRC_PY416	20q12-q13	0.04	0.1	0.38	0.44	-0.06	0.255	0.409	Under-expressed
CHEK1	11q24.2	0.07	0.02	0.24	0.33	0.04	0.259	0.411	Over-expressed
WWTR1	3q25.1	0.07	0.03	0.26	0.24	0.04	0.26	0.411	Over-expressed
RBM15	1p13.3	0.03	-0.04	0.54	0.49	0.07	0.289	0.453	Over-expressed
PRKAA1_PT172	5p12	-0.14	-0.04	0.64	0.71	-0.09	0.297	0.462	Under-expressed
AKT1S1_PT246	19q13.33	-0.07	-0.03	0.32	0.28	-0.04	0.32	0.494	Under-expressed
LCK	1p35.2	-0.02	0.02	0.4	0.3	-0.05	0.327	0.501	Under-expressed
EGFR_PY1173	7p12	-0.02	0	0.13	0.14	-0.02	0.331	0.504	Under-expressed
BIRC2	11q22.2	0	0.03	0.24	0.24	-0.03	0.334	0.504	Under-expressed
SNAI1	20q13.13	0.09	0.16	0.35	0.75	-0.07	0.339	0.508	Under-expressed
IGFBP2	2q35	0.16	0.03	1.11	1.08	0.14	0.351	0.518	Over-expressed
ERBB2	17q12	0.02	-0.09	0.99	0.78	0.11	0.353	0.518	Over-expressed
SCD	10q24.31	0.03	0	0.18	0.19	0.02	0.353	0.518	Over-expressed
XRCC5	2q35	-0.12	-0.07	0.42	0.35	-0.05	0.355	0.518	Under-expressed
ERCC1	19q13.32	-0.01	0.03	0.2	0.39	-0.03	0.359	0.519	Under-expressed
MAP2K1_PS217_S221	15q22.1-q22.33	0.07	0.13	0.52	0.45	-0.06	0.365	0.525	Under-expressed
SMAD4	18q21.2	0.04	0.06	0.2	0.21	-0.02	0.37	0.528	Under-expressed
SETD2	3p21.31	0.12	0.08	0.43	0.37	0.05	0.377	0.535	Over-expressed
DIRAS3	1p31.3	0.09	0.11	0.25	0.24	-0.03	0.382	0.539	Under-expressed
ACVRL1	12q13.13	-0.02	0.01	0.21	0.21	-0.02	0.385	0.539	Under-expressed
JUN_PS73	1p32-p31	0.06	0.03	0.27	0.29	0.03	0.408	0.566	Over-expressed
FASN	17q25.3	-0.01	-0.08	0.63	0.67	0.07	0.428	0.586	Over-expressed
FN1	2q35	0.05	-0.01	0.6	0.51	0.06	0.431	0.586	Over-expressed
MAPK1_PT202_Y204	22q11.21	0.08	0.16	0.88	0.78	-0.09	0.433	0.586	Under-expressed
MAPK3_PT202_Y204	16p11.2	0.08	0.16	0.88	0.78	-0.09	0.433	0.586	Under-expressed
PEA15_PS116	1q21.1	-0.01	0.05	0.54	0.64	-0.06	0.442	0.59	Under-expressed
CLDN7	17p13.1	-0.15	-0.06	0.91	0.81	-0.09	0.442	0.59	Under-expressed
CDH2	18q12.1	-0.03	0.01	0.33	0.38	-0.04	0.445	0.591	Under-expressed
ERRFI1	1p36.23	0.02	0	0.16	0.19	0.02	0.45	0.592	Over-expressed
TSC1	9q34.13	0.01	-0.02	0.28	0.26	0.03	0.453	0.592	Over-expressed
MAPK8_PT183	10q11.22	0.01	0.04	0.23	0.29	-0.03	0.455	0.592	Under-expressed
YWHAE	17p13.3	0.04	0.05	0.21	0.15	-0.02	0.465	0.602	Under-expressed
SMAD3	15q22.33	-0.04	-0.02	0.23	0.26	-0.02	0.472	0.603	Under-expressed
IRS1	2q36.3	-0.01	0.02	0.33	0.34	-0.03	0.474	0.603	Under-expressed
CASP7	10q25.3	0.21	0.12	0.95	0.93	0.09	0.475	0.603	Over-expressed
BID	22q11.21	-0.02	-0.04	0.18	0.2	0.02	0.48	0.605	Over-expressed
ATM	11q22.3	0.06	0.13	0.73	0.83	-0.07	0.486	0.61	Under-expressed
MET_PY1235	7q31	-0.03	-0.04	0.13	0.13	0.01	0.49	0.611	Over-expressed
DIABLO	12q24.31	0.03	-0.02	0.48	0.47	0.04	0.518	0.642	Over-expressed
SHC1_PY317	1q21	0.09	0.06	0.27	0.25	0.02	0.524	0.645	Over-expressed
BAK1	6p21.31	-0.11	-0.07	0.41	0.42	-0.03	0.537	0.65	Under-expressed
AKT1	14q32.33	-0.01	-0.05	0.43	0.33	0.03	0.54	0.65	Over-expressed
AKT2	19q13.2	-0.01	-0.05	0.43	0.33	0.03	0.54	0.65	Over-expressed
AKT3	1q43-q44	-0.01	-0.05	0.43	0.33	0.03	0.54	0.65	Over-expressed
EEF2K	16p12.2	-0.09	-0.04	0.65	0.59	-0.05	0.557	0.666	Under-expressed
G6PD	Xq28	0.13	0.09	0.66	0.5	0.05	0.569	0.675	Over-expressed
PRKCD_PS664	3p21.31	0.02	0	0.18	0.18	0.01	0.57	0.675	Over-expressed
RPS6_PS235_S236	9p21	0.03	-0.03	0.8	0.75	0.06	0.577	0.678	Over-expressed
RICTOR	5p13.1	0.18	0.11	0.85	0.92	0.06	0.597	0.698	Over-expressed
PEA15	1q23.2	-0.02	0	0.33	0.33	-0.02	0.605	0.703	Under-expressed
MAPK9	5q35.3	-0.07	-0.1	0.35	0.33	0.02	0.621	0.718	Over-expressed
KIT	4q12	0.15	0.12	0.49	0.42	0.03	0.628	0.722	Over-expressed
SERPINE1	7q22.1	0.08	0.05	0.54	0.52	0.03	0.646	0.739	Over-expressed
BECN1	17q21.31	0.04	0.03	0.18	0.15	0.01	0.654	0.743	Over-expressed
YAP1	11q22.1	-0.01	-0.02	0.29	0.22	0.02	0.657	0.743	Over-expressed
NDRG1_PT346	8q24.3	0.14	0.1	0.79	0.72	0.04	0.705	0.793	Over-expressed
MRE11	11q21	0.05	0.05	0.13	0.16	0.01	0.719	0.804	Over-expressed
RPS6KA1_PT359_S363	1p	0.04	0.06	0.37	0.33	-0.02	0.746	0.83	Under-expressed
EGFR_PY1068	7p12	0.11	0.13	0.51	0.41	-0.02	0.761	0.842	Under-expressed
SRSF1	17q22	0.03	0.02	0.17	0.17	0.01	0.78	0.857	Over-expressed
ARAF_PS299	Xp11.4-p11.2	0.06	0.06	0.19	0.17	0.01	0.782	0.857	Over-expressed
FOXO3	6q21	0.07	0.07	0.17	0.14	0.01	0.793	0.864	Over-expressed
PXN	12q24.23	-0.03	-0.02	0.41	0.44	-0.01	0.801	0.868	Under-expressed
PRKCB_PS660	16p11.2	-0.08	-0.09	0.48	0.47	0.01	0.814	0.878	Over-expressed
RPS6KB1	17q23.1	-0.02	-0.01	0.42	0.3	-0.01	0.821	0.88	Under-expressed
SRC	20q11.23	0	-0.01	0.37	0.33	0.01	0.835	0.891	Over-expressed
CDH3	16q22.1	0.08	0.07	0.26	0.21	0.01	0.846	0.893	Over-expressed
GSK3A	19q13.2	-0.04	-0.03	0.26	0.21	-0.01	0.85	0.893	Under-expressed
GSK3B	3q13.33	-0.04	-0.03	0.26	0.21	-0.01	0.85	0.893	Under-expressed
GAPDH	12p13.31	-0.1	-0.12	1.07	0.85	0.02	0.867	0.906	Over-expressed
SRC_PY527	20q12-q13	-0.02	-0.04	0.76	0.75	0.02	0.88	0.916	Over-expressed
TSC2	16p13.3	-0.09	-0.08	0.48	0.35	-0.01	0.885	0.916	Under-expressed
BRAF	7q34	-0.17	-0.16	0.64	0.6	-0.01	0.915	0.942	Under-expressed
ACACA	17q12	0	0.01	0.68	0.55	-0.01	0.925	0.948	Under-expressed
YWHAB	20q13.12	0.03	0.03	0.17	0.19	0	0.952	0.971	Under-expressed
YBX1_PS102	1p34	-0.01	-0.01	0.34	0.28	0	0.969	0.979	Under-expressed
ACACA_PS79	17q21	-0.03	-0.02	0.65	0.54	0	0.975	0.979	Under-expressed
ACACB_PS79	12q24.11	-0.03	-0.02	0.65	0.54	0	0.975	0.979	Under-expressed
CAV1	7q31.2	0.07	0.07	1	1.05	0	0.991	0.991	Under-expressed
